# Supplementary material for: Sequence Motif Analysis of PRDM9 and Short Inverted Repeats Suggests Their Contribution to Human Microdeletion and Microduplication Syndromes
Source: MDPI journal article supplement (doi:10.3390/biomedinformatics3020018), 2023-04-01
Supplement: s1 [file s1]

Archive with 6 entries (6 files):
- Supplemental Dataset S1.zip
- Supplemental Figures.pdf
- Table S1.xlsx
- Table S2.xlsx
- Table S3.xlsx
- Table S4.txt
