# Supplementary material for: Sequence Motif Analysis of PRDM9 and Short Inverted Repeats Suggests Their Contribution to Human Microdeletion and Microduplication Syndromes
Source: MDPI journal article supplement (doi:10.3390/biomedinformatics3020018), 2023-04-01
Supplement: s1 [file s1 › Supplemental Figures.pdf]

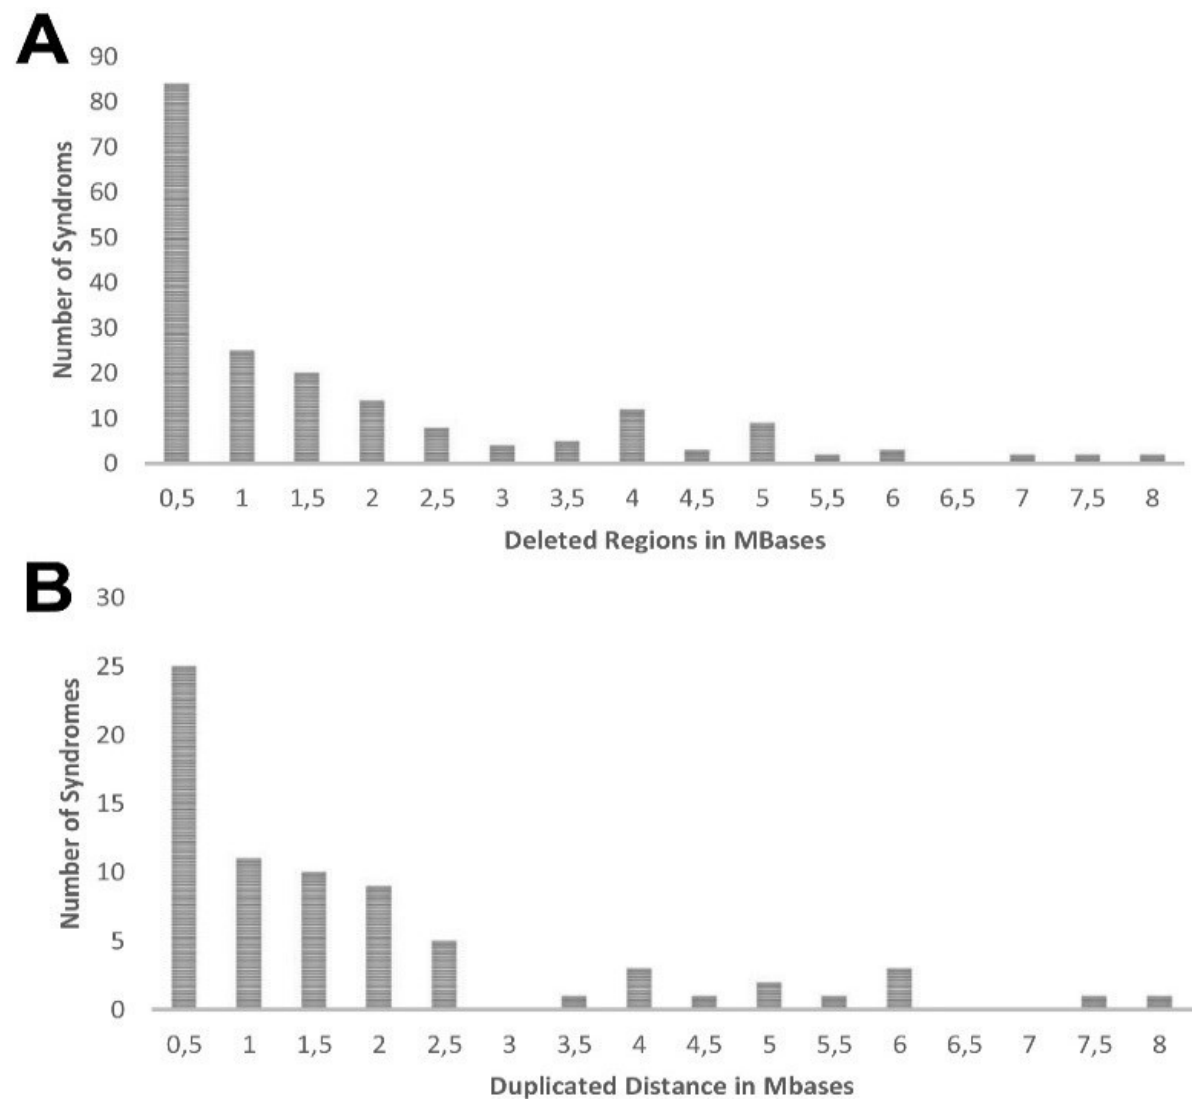

**Figure S1.** Frequency distribution graphs containing all microdeletion and microduplication syndromes. Most syndromes are associated with CNVs below 1 Mb

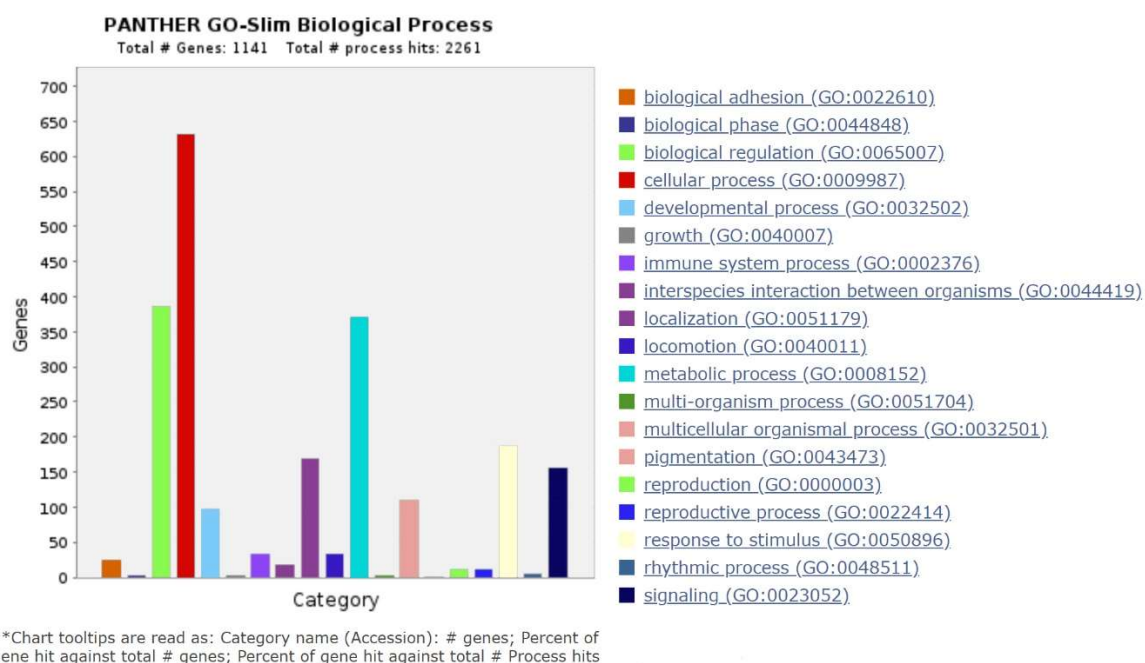

**Figure S2.** Gene Ontology (GO) pathway enrichment analysis. The relative abundance of metabolic pathways is shown in distinct color bars. A p-value < 0.05 and a Z-score > 3 or < -3 were considered significant.
