# Supplementary material for: Sequence Motif Analysis of PRDM9 and Short Inverted Repeats Suggests Their Contribution to Human Microdeletion and Microduplication Syndromes
Source: MDPI journal article supplement (doi:10.3390/biomedinformatics3020018), 2023-04-01
Supplement: s1 [file s1 › Table S1.xlsx]

## Sheet: Mdeletionhg38
chr1	10000	10077413	microdeletion 1p36 (GABRD)
chr1	97547412	99477412	microdeletion 1p21.3
chr1	146513386	147876376	microdeletion 1q21.1
chr1	145438643	145715643	thrombocytopenia
chr1	146573376	147393376	deletion 1q21.1
chr1	171868377	173832377	microdeletion 1q24q25
chr1	171733377	172333377	microdeletion 1q24.3
chr1	209642377	210210377	Van der Waude syndrome
chr1	223068377	223708377	microdeletion 1q41–42
chr1	244509377	244869377	corpus callosum agenesis microdeletion
chr2	16081549	16087549	Feingold syndrome
chr2	44530496	44588496	hypotonia-cystinuria syndrome
chr2	45168496	45172496	holoprosencephaly 2
chr2	50157496	50583496	NRXN1 microdeletion
chr2	57683496	61680496	microdeletion 2p15–16.1
chr2	63902496	65523496	microdeletion 2p14-p15
chr2	77743492	87237489	microdeletion 2q11.2
chr2	96726273	97676273	mesomelic dysplasia
chr2	100693568	108443568	microdeletion 2q11.2q13
chr2	110935711	110962711	nephronophthisis 1
chr2	111333937	113233529	microdeletion 2q13
chr2	124783530	125783530	autism-dyslexia microdeletion 2q14.3
chr2	145183530	145277530	Mowat–Wilson syndrome
chr2	149247530	149433530	microdeletion 2q23.1
chr2	153441754	157221754	microdeletion 2q23.3q24.1
chr2	165424754	166853754	microdeletion 2q24.3
chr2	176950754	177970754	synpolydactyly 1
chr3	60000	7020000	distal 3p deletion
chr3	10183000	10194000	Von Hippel Lindau disease
chr3	49144996	52244960	microdeletion 3p21.31
chr3	71081310	71876310	microdeletion 3p14.1p13
chr3	86986310	87325310	microdeletion 3p11.1p12.1
chr3	104917310	107417310	proximal 3q microdeletion syndrome
chr3	113852310	114433310	microdeletion 3q13.31
chr3	138663310	138665310	blepharophimosis, ptosis, and epicanthus inversus
chr3	147127310	147134310	Dandy–Walker syndrome
chr3	187387306	196595603	microdeletion 3q29
chr4	10000	2073202	Wolf–Hirschhorn syndrome
chr4	16973902	21137902	microdeletion 4p15.3
chr4	81730976	83130976	microdeletion 4q21.21q21.22
chr4	82008976	83381976	microdeletion 4q21
chr4	88928976	88998976	microdeletion 4q21.2q21.3
chr4	111538551	111559551	Rieger type 1
chr5	36961243	36997243	Cornelia de Lange syndrome
chr5	70242244	70250244	spinal muscular atrophy
chr5	86106244	86377244	microdeletion 5q14.3
chr5	88364244	90054244	microdeletion 5q14.3-q15
chr5	112101101	112221101	FAP
chr5	134194101	134435101	PITX1 microdeletion
chr5	139136816	141701816	microdeletion 5q31.3
chr5	172659394	172662394	microdeletion 5q35.1
chr5	174151394	174158394	parietal foramina
chr5	175130394	177456394	Sotos syndrome
chr6	20742021	21142021	microdeletion 6p22.3
chr6	32006021	32009021	adrenal hyperplasia
chr6	33165022	33978022	microdeletion 6p21.31
chr6	72593279	76253280	microdeletion 6q13–14
chr6	100836279	100911279	Prader–Willi like
chr6	155458308	158933012	microdeletion 6q25.2-q25.3
chr6	161768010	162864010	PARK2 microdeletion
chr6	165634010	170920075	microdeletion 6q27 anosmia
chr7	42000475	42276475	Greig cephalopolysyndactyly
chr7	72333064	74617064	Williams–Beuren syndrome
chr7	74962064	76662064	WBS-distal deletion (RHBDD2, HIP1)
chr7	95532064	96781064	split hand/foot malformation 1
chr7	101253280	104772764	microdeletion 7q22.1-q22.3
chr7	110866764	111478764	autism/dyslexia microdeletion 7q31.1
chr7	114297764	114302764	speech-language-disorder 1
chr7	155595239	155605239	holoprosencephaly 3
chr7	156797239	156803239	Currarino syndrome
chr8	8118590	11765591	microdeletion 8p23.1
chr8	20705720	24334110	microdeletion 8p21.2
chr8	24444110	31180458	microdeletion 8p12p21
chr8	61591446	61779446	CHARGE syndrome
chr8	65287446	68857446	microdeletion 8q12.3q13.2
chr8	70378446	70745446	mesomelia-synostoses syndrome
chr8	77226445	77766445	microdeletion 8q21.11
chr8	93140824	97870824	nablus mask-like facial syndrome
chr8	100620824	104490824	microdeletion 8q22.2q22.3
chr8	118811819	119123819	Langer–Giedion syndrome
chr9	10000	1058000	sex reversal syndrome 4
chr9	95380179	100060179	microdeletion 9q22.3
chr9	98244179	98279179	holoprosencephaly 7
chr9	129377179	129459179	nail-patella syndrome
chr9	130374179	130455179	early infantile epileptic encephalopathy 4
chr9	137810179	141080179	EHMT1
chr9	140353179	141153179	subtelomere deletion 9q
chr10	8096994	8116994	HDRS
chr10	21103994	21129994	Di George syndrome 2
chr10	81665020	88994020	microdeletion 10q22-q23
chr10	88685020	89623020	juvenile polyposis syndrome
chr11	2904424	2907424	Beckwith–Wiedemann syndrome
chr11	31810424	32510424	WAGR syndrome
chr11	43948424	46123424	Potocki–Shaffer syndrome
chr11	86656352	86666352	microdeletion 11q14.1
chr12	65069733	68645733	microdeletion 12q14
chr13	20812000	21012000	Noonan syndrome 1
chr13	23438000	24909000	microdeletion 13q12
chr13	32239000	32973000	spastic ataxia Charlevoix–Saguenay
chr13	48877999	49055999	microdeletion 13q12.3-q13.1
chr13	78470999	78492999	retinoblastoma
chr13	100633999	100638999	Hirschsprung disease 2
chr14	21850160	21877160	microdeletion 14q11.2
chr14	29230249	30930249	congenital Rett variant
chr14	54416250	61191247	microdeletion 14q22-q23
chr14	64854247	65401247	autism spherocytosis microdeletion
chr14	100393247	101504247	microdeletion 14q32.2
chr15	22798636	23088559	Prader–Willi syndrome Typ 1
chr15	23757907	28557405	Prader–Willi syndrome Typ 2
chr15	23757907	28557405	microdeletion 15q13.3
chr15	29209443	34160708	DMIS
chr15	50594708	50777708	microdeletion 15q21
chr15	72912946	74412947	microdeletion 15q24
chr15	74370947	76161945	microdeletion 15q24
chr15	78292945	82550945	orofacial clefting
chr15	85098996	85798996	microdeletion 15q25
chr15	93298996	93798996	microdeletion 15q26.1
chr15	94436996	98702477	Fryns syndrome
chr15	97798996	102521392	microdeletion 15q26.2
chr16	60000	833999	ATR-16-syndrome
chr16	2097999	2138999	PKDTS
chr16	3821999	3860999	Rubinstein–Taybi syndrome 1
chr16	14881499	16373499	microdeletion 16p13.1
chr16	21613499	29042499	microdeletion 16p11.2-p12.2
chr16	21942499	22462499	microdeletion 16p12.1
chr16	28772499	29112499	16q11.2 distal microdeletion
chr16	29643499	30151499	microdeletion 16p11.2
chr16	46843499	47021499	microdeletion 16q11.2-q12.1
chr16	67063499	67134499	microdeletion 16q21-q22
chr16	49460499	54168499	microdeletion 16q12.1-q12.2
chr16	84350499	86595499	microdeletion 16q24.1
chr16	89864499	89883499	FANCA deletion
chr17	0	2545250	Miller–Dieker syndrome
chr17	7488276	7996275	microdeletion 17p13.1
chr17	13914275	15434275	HNPP
chr17	16586275	20482408	Smith–Magenis syndrome
chr17	29077874	30218887	neurofibromatosis 1
chr17	29255874	34005887	microdeletion 17q11.2-q12
chr17	34902887	36075887	microdeletion 17q12a
chr17	34755887	36275614	renal cysts and diabetes syndrome
chr17	41831474	41836474	Van Buchem disease
chr17	43632217	44210223	microdeletion 17q21.3
chr17	44413366	45758001	microdeletion 17q21.31-q21.32
chr17	50945001	56845001	microdeletion 17q22-q23.2
chr17	64299538	68178405	microdeletion 17q24.2-q24.3
chr17	65829538	68082405	carney complex syndrome 1
chr18	3455000	3458000	holoprosencephaly 4
chr18	39246002	44246002	proximal 18q microdeletion
chr18	52932002	53131002	Pitt–Hopkins syndrome
chr18	72345012	74982012	microdeletion 18q22.3-q23
chr19	12932000	13243000	microdeletion 19p13.13
chr19	14258000	14578000	microdeletion 19p13.12
chr19	16624000	17693000	microdeletion 19p13.11
chr19	32608160	35508160	microdeletion 19q13.11
chr19	42364160	42375160	Diamond–Blackfan anemia
chr20	6959000	7064000	microdeletion 20p12.3
chr20	10530000	10721000	Alagille syndrome 1
chr20	50326593	51406593	microdeletion 20q13.13-q13.2
chr20	57466605	57486605	Albright hereditary osteodystrophy
chr20	61775555	62905556	microdeletion 20q13.33
chr21	21028129	21328129	microdeletion 21q21.1
chr21	35821130	36421130	platelet disorder
chr22	22116000	23696000	distal microdeletion 22q11.2
chr22	30000000	30095000	neurofibromatosis 2
chrX	5808000	6147000	X-Linked autism-2
chrX	6442000	8168000	Steroid sulphatase deficiency
chrX	8497000	8700000	Kallmann syndrome 1
chrX	11129079	11749079	MIDAS syndrome
chrX	16943079	17858079	Nance–Horan syndrome
chrX	23018079	23399079	microdeletion Xp22.11
chrX	30323079	30327079	X-linked congenital adrenal hypoplasia
chrX	30323079	30749079	complex glycerol kinase
chrX	32535079	33358079	muscular dystrophy Duchenne
chrX	46308056	46742056	Xp11.3 deletion syndrome
chrX	48367056	48379056	Goltz syndrome
chrX	72946275	73146275	X inactivation specific transcript
chrX	100603344	100610344	Bruton agammaglobulinemia
chrX	102722344	103211344	microdeletion Xq22.2
chrX	107327344	110352344	microdeletion Xq22.3q23
chrX	123480319	123507319	lymphoproliferative syndrome 1
chrX	146993308	147032308	fragile site mental retardation 1
chrX	147235308	147735308	microdeletion Xq28
chrY	2655000	2656000	Rett syndrome
chrY	14423992	15154606	sex-determining region Y
chrY	20238612	26065612	AZFb microdeletion
chrY	19964606	27793612	AZFb+c microdeletion
chrY	24977612	27793612	AZFc microdeletion

## Sheet: Mduplicationhg38
chr1	45818413	47035413	microduplication 1p34.1
chr1	146513386	147876376	microduplication 1q21.1
chr1	146573376	147393376	duplication 1q21.1 (GJA5)
chr2	3270993	3470993	microduplication 2p25.3
chr2	45346496	46046496	microduplication 2p21
chr2	50157496	50583496	NRXN1 microduplication
chr2	100693568	108443568	microduplication 2q11.2q13
chr2	110935711	110962711	microduplication 2q11.2q13
chr2	111333937	113233529	microduplication 2q13
chr2	124783530	125783530	microduplication 2q14.3
chr2	165424754	166853754	neonatal epilepsy microduplication
chr2	176950754	177970754	microduplication 2q31.1
chr3	195641603	197497603	microduplication 3q29
chr4	10000	197497603	microduplication 4p16.3
chr4	9840902	197497603	microduplication 4p16.1
chr4	90527977	197497603	Parkinson disease
chr4	157136550	197497603	4q32.1-q32.2 Triple/Duplication syndrome
chr5	36961243	197497603	NIPBL microduplication
chr5	126018101	197497603	ADLD
chr5	170289422	197497603	Pseudo trisomy 13 syndrome
chr5	175130394	197497603	microduplication 5q35
chr6	144261307	197497603	TNDM1
chr6	161768010	197497603	PARK2 microduplication
chr6	165634010	197497603	Chondroma
chr7	72333064	197497603	microduplication 7q11.23
chr7	156143239	197497603	TPTS
chr8	8118590	197497603	microduplication 8p23.1
chr8	53287447	197497603	microduplication 8q11.23
chr8	61591446	197497603	microduplication 8q12
chr9	71861180	197497603	microduplication 9q21.11
chr9	95380179	197497603	PTCH1 microduplication
chr9	137810179	197497603	microduplication 9q34 (EHMT1)
chr10	102987010	197497603	Split-Hand/Foot Malformation 3
chr11	2904424	197497603	SRS microduplication
chr11	31810424	197497603	microduplication 11p13
chr11	61453424	197497603	spinocerebellar ataxia type 20
chr12	8158733	197497603	microduplication 12p13.31
chr13	20812000	197497603	microduplication 13q12
chr14	29230249	197497603	microduplication 14q12
chr15	22798636	197497603	microduplication 15
chr15	23757907	197497603	microduplication 15
chr15	23757907	197497603	microduplication 15
chr15	30737708	197497603	microduplication 15q13.3
chr15	74370947	197497603	microduplication 15q24
chr16	2097999	197497603	tuberous sclerosis microduplication
chr16	3821999	197497603	Rubinstein–Taybi-microduplication
chr16	14881499	197497603	microduplication 16p13.1
chr16	21613499	197497603	microduplication 16p11.2-p12.2
chr16	21942499	197497603	microduplication 16p12.2
chr16	28772499	197497603	16q11.2 distal microduplication
chr16	29643499	197497603	microduplication 16p11.2
chr17	0	197497603	Miller–Dieker microduplication
chr17	13914275	197497603	Charcot–Marie–Tooth 1A
chr17	16586275	197497603	Potocki–Lupski syndrome
chr17	29077874	197497603	microduplication NF1
chr17	34755887	197497603	microduplication 17q12b
chr17	43632217	197497603	microduplication 17q21.31
chr17	58102218	197497603	microduplication 17q23.1–23.2
chr17	68130405	197497603	microduplication 17q24.3
chr19	9246000	197497603	Sotos-like microduplication 19p13.2
chr19	12932000	197497603	microduplication 19p13.13
chr21	27038129	197497603	microduplication 21q21.3
chr22	22116000	197497603	distal microduplication 22q11.2
chrX	30323079	197497603	DAX1 microduplication
chrX	53450275	197497603	17-beta-hydroxysteroid dehydrogenase X
chrX	67518275	197497603	microduplication Xq12q13.1
chrX	102722344	197497603	Pelizaeus–Merzbacher microduplication
chrX	139585334	197497603	X-linked hypopituitarism
chrX	152881806	197497603	MECP2 microduplication
chr21	38378130	197497603	Down Syndrome
