# Supplementary material for: Sequence Motif Analysis of PRDM9 and Short Inverted Repeats Suggests Their Contribution to Human Microdeletion and Microduplication Syndromes
Source: MDPI journal article supplement (doi:10.3390/biomedinformatics3020018), 2023-04-01
Supplement: s1 [file s1 › Table S2.xlsx]

## Sheet: PRDM9
chr2	203798060	203798191	CCACCATAACCCC
chr3	194043191	194043322
chr9	4329443	4329574
chr10	114467990	114468121
chr11	119572273	119572404
chr14	64621642	64621773
chr15	94094710	94094841
chr17	182780	182911
chr17	67053515	67053646
chr18	43496728	43496859
chr19	32137554	32137685
chr1	223477984	223478115	CCACCATCACCAC
chr2	64375539	64375670
chr2	64375548	64375679
chr2	64375627	64375758
chr2	64375671	64375802
chr2	64375703	64375834
chr2	64375712	64375843
chr2	64375741	64375872
chr2	64375750	64375881
chr2	64375779	64375910
chr2	64375788	64375919
chr2	64375817	64375948
chr2	64375826	64375957
chr2	64375896	64376027
chr2	64375905	64376036
chr2	64375934	64376065
chr2	64375943	64376074
chr2	64376007	64376138
chr2	64376016	64376147
chr2	64376048	64376179
chr2	64376057	64376188
chr2	64376086	64376217
chr2	64376095	64376226
chr2	64376127	64376258
chr2	64376226	64376357
chr2	86171357	86171488
chr2	96649309	96649440
chr2	111251455	111251586
chr2	111251476	111251607
chr2	112346170	112346301
chr2	112346214	112346345
chr2	112346229	112346360
chr2	112346238	112346369
chr2	112346262	112346393
chr2	112346271	112346402
chr2	112346283	112346414
chr2	112346292	112346423
chr2	112346307	112346438
chr2	112346316	112346447
chr2	112346331	112346462
chr2	112346340	112346471
chr2	112346349	112346480
chr2	112346364	112346495
chr2	112346373	112346504
chr2	112346388	112346519
chr2	112346397	112346528
chr2	112346412	112346543
chr2	112346421	112346552
chr2	112346478	112346609
chr2	112346559	112346690
chr2	112346592	112346723
chr2	112346636	112346767
chr2	112346645	112346776
chr2	112346657	112346788
chr2	112346678	112346809
chr2	112346687	112346818
chr2	112346699	112346830
chr2	112346708	112346839
chr2	112346723	112346854
chr2	112346732	112346863
chr2	112346817	112346948
chr2	112346940	112347071
chr2	112346958	112347089
chr2	112347000	112347131
chr2	112347015	112347146
chr2	112347045	112347176
chr2	112347081	112347212
chr2	124771662	124771793
chr2	188328022	188328153
chr2	199169581	199169712
chr2	201962610	201962741
chr2	203392210	203392341
chr2	204157527	204157658
chr2	231005182	231005313
chr2	231005242	231005373
chr2	231005314	231005445
chr2	231005383	231005514
chr2	231005425	231005556
chr2	231005452	231005583
chr2	231579535	231579666
chr2	240400677	240400808
chr3	9722841	9722972
chr3	49318871	49319002
chr3	87158400	87158531
chr3	195767508	195767639
chr3	195767520	195767651
chr3	195767556	195767687
chr3	195767565	195767696
chr3	195767662	195767793
chr3	195767695	195767826
chr3	195767713	195767844
chr3	195767749	195767880
chr3	195767767	195767898
chr3	195767812	195767943
chr3	195767821	195767952
chr3	195767833	195767964
chr3	197709246	197709377
chr4	1451790	1451921
chr4	1452592	1452723
chr4	1453210	1453341
chr4	1453252	1453383
chr4	1453536	1453667
chr5	7371341	7371472
chr5	7371558	7371689
chr5	7371645	7371776
chr5	7371984	7372115
chr5	7372091	7372222
chr5	7372196	7372327
chr5	7372259	7372390
chr5	7372403	7372534
chr5	7372448	7372579
chr5	7372469	7372600
chr5	7372484	7372615
chr5	7372511	7372642
chr5	7372571	7372702
chr5	7372607	7372738
chr5	7372664	7372795
chr5	7372738	7372869
chr5	7372789	7372920
chr5	7487262	7487393
chr5	7741448	7741579
chr5	9407838	9407969
chr5	9408136	9408267
chr5	9863114	9863245
chr5	177272081	177272212
chr6	3221909	3222040
chr6	3221952	3222083
chr6	3222039	3222170
chr6	3222075	3222206
chr6	3222178	3222309
chr6	5923613	5923744
chr6	6243039	6243170
chr6	33443376	33443507
chr6	157041778	157041909
chr6	157254052	157254183
chr6	157270095	157270226
chr6	157270524	157270655
chr6	157270592	157270723
chr6	165749273	165749404
chr6	167591154	167591285
chr6	167641428	167641559
chr6	167641464	167641595
chr6	167641473	167641604
chr6	167789987	167790118
chr6	167987583	167987714
chr6	168120001	168120132
chr6	168837648	168837779
chr6	169924363	169924494
chr7	76887628	76887759
chr8	8879824	8879955
chr8	11003247	11003378
chr8	23007167	23007298
chr8	26481226	26481357
chr8	28847351	28847482
chr8	93828250	93828381
chr8	100426458	100426589
chr8	100426467	100426598
chr8	117936456	117936587
chr9	399914	400045
chr9	399914	400045
chr9	399948	400079
chr9	399948	400079
chr9	399966	400097
chr9	399966	400097
chr9	399987	400118
chr9	399987	400118
chr9	400029	400160
chr9	400029	400160
chr9	400086	400217
chr9	400086	400217
chr9	400110	400241
chr9	400110	400241
chr9	400170	400301
chr9	400170	400301
chr9	400188	400319
chr9	400188	400319
chr9	400206	400337
chr9	400206	400337
chr9	400299	400430
chr9	400299	400430
chr9	400341	400472
chr9	400341	400472
chr9	400362	400493
chr9	400362	400493
chr9	400441	400572
chr9	400441	400572
chr9	400462	400593
chr9	400462	400593
chr9	400519	400650
chr9	400519	400650
chr9	400537	400668
chr9	400537	400668
chr9	400561	400692
chr9	400561	400692
chr9	400579	400710
chr9	400579	400710
chr9	400651	400782
chr9	400651	400782
chr9	400726	400857
chr9	400726	400857
chr9	400744	400875
chr9	400744	400875
chr9	400786	400917
chr9	400786	400917
chr9	400804	400935
chr9	400804	400935
chr9	400882	401013
chr9	400882	401013
chr9	400912	401043
chr9	400912	401043
chr9	401032	401163
chr9	401032	401163
chr9	1241720	1241851
chr9	6241294	6241425
chr9	95421987	95422118
chr9	95705709	95705840
chr9	95705842	95705973
chr10	82461272	82461403
chr10	86116981	86117112
chr10	86117077	86117208
chr10	86117230	86117361
chr10	86117561	86117692
chr10	123254453	123254584
chr10	123254590	123254721
chr10	123254713	123254844
chr10	123254830	123254961
chr10	123935801	123935932
chr10	130546898	130547029
chr10	131590671	131590802
chr10	131590845	131590976
chr10	131591220	131591351
chr11	45093556	45093687
chr11	116608421	116608552
chr11	120876201	120876332
chr11	131828406	131828537
chr11	134308188	134308319
chr11	134308315	134308446
chr11	134308324	134308455
chr11	134308381	134308512
chr11	134308424	134308555
chr12	65640437	65640568
chr13	23134575	23134706
chr13	99982062	99982193
chr14	28767376	28767507
chr14	59420137	59420268
chr14	100239404	100239535
chr14	100526971	100527102
chr14	100527200	100527331
chr15	31657632	31657763
chr15	35738210	35738341
chr15	73399549	73399680
chr15	93174567	93174698
chr15	98839334	98839465
chr15	101673436	101673567
chr16	23828350	23828481
chr16	25421830	25421961
chr16	26542497	26542628
chr16	26542592	26542723
chr16	29226849	29226980
chr16	29226938	29227069
chr16	29226953	29227084
chr16	29226971	29227102
chr16	46827210	46827341
chr16	51690295	51690426
chr16	85519597	85519728
chr16	85519627	85519758
chr16	86013910	86014041
chr17	18582436	18582567
chr17	30846083	30846214
chr17	46767482	46767613
chr17	46767482	46767613
chr17	56293285	56293416
chr18	3740952	3741083
chr18	3740993	3741124
chr18	3741056	3741187
chr18	3741097	3741228
chr18	3741265	3741396
chr18	5750698	5750829
chr18	13106322	13106453
chr18	42445629	42445760
chr18	44987012	44987143
chr18	77252816	77252947
chr18	77252831	77252962
chr18	77252858	77252989
chr18	77252885	77253016
chr18	77252894	77253025
chr18	77252906	77253037
chr18	77252915	77253046
chr18	77252924	77253055
chr18	77252960	77253091
chr18	77252969	77253100
chr19	34640629	34640760
chr19	34644406	34644537
chr20	63442567	63442698
chr20	63442597	63442728
chr20	63442678	63442809
chr20	63442825	63442956
chr20	63442834	63442965
chr20	63442912	63443043
chr20	63443138	63443269
chr20	63443278	63443409
chr20	63443401	63443532
chr20	63443524	63443655
chr20	63443548	63443679
chr20	64096747	64096878
chr20	64096789	64096920
chr20	64097065	64097196
chrX	17262940	17263071
chrX	23209458	23209589
chrX	109273401	109273532
chrY	20666974	20667105
chrY	20666974	20667105
chr2	58155693	58155824	CCACCATCCCCCC
chr2	177533325	177533456
chr3	5422820	5422951
chr3	5422820	5422951
chr6	166893857	166893988
chr7	96131188	96131319
chr9	135978329	135978460
chr9	137842257	137842388
chr9	137842257	137842388
chr9	137842284	137842415
chr9	137842284	137842415
chr9	137842391	137842522
chr9	137842391	137842522
chr9	137842418	137842549
chr9	137842418	137842549
chr9	137842467	137842598
chr9	137842467	137842598
chr9	137842520	137842651
chr9	137842520	137842651
chr9	137842622	137842753
chr9	137842622	137842753
chr9	137842674	137842805
chr9	137842674	137842805
chr10	121429718	121429849
chr15	81185075	81185206
chr15	85066509	85066640
chr15	100820733	100820864
chr16	27437373	27437504
chr17	2723059	2723190
chr19	33749390	33749521
chr19	33753563	33753694
chr19	33753581	33753712
chr19	33753613	33753744
chr19	33753792	33753923
chr22	23200406	23200537
chr2	235778202	235778333	CCACCATCGCCCC
chr3	188582928	188583059
chr9	136939668	136939799
chr10	133142000	133142131
chr11	120956846	120956977
chr11	129858332	129858463
chr16	28059536	28059667
chr1	58048555	58048686	CCACCATGACCAC
chr1	244420788	244420919
chr2	63751877	63752008
chr2	84632384	84632515
chr2	153262536	153262667
chr2	236665812	236665943
chr2	240450984	240451115
chr5	4574425	4574556
chr5	87050083	87050214
chr5	175888312	175888443
chr6	5609451	5609582
chr6	73704158	73704289
chr6	74555719	74555850
chr6	167201481	167201612
chr8	25218340	25218471
chr8	94200578	94200709
chr8	94418484	94418615
chr9	400951	401082
chr9	400951	401082
chr9	93060163	93060294
chr9	93621279	93621410
chr10	116697312	116697443
chr10	116717500	116717631
chr10	127947608	127947739
chr16	27075634	27075765
chr16	28219530	28219661
chr16	53986144	53986275
chr17	18426863	18426994
chr19	32183656	32183787
chr19	34961962	34962093
chrX	7398269	7398400
chrY	19896489	19896620
chrY	19896489	19896620
chr2	96796837	96796968	CCACCATGACCCC
chr2	165665121	165665252
chr2	238300219	238300350
chr3	13859550	13859681
chr3	51959672	51959803
chr5	1770191	1770322
chr5	177477891	177478022
chr6	5505269	5505400
chr6	168195035	168195166
chr6	168544141	168544272
chr7	104201162	104201293
chr8	21478525	21478656
chr9	4436399	4436530
chr9	11244917	11245048
chr9	93916614	93916745
chr10	84128569	84128700
chr10	112854415	112854546
chr10	124031845	124031976
chr11	46096997	46097128
chr18	10317431	10317562
chr18	10565699	10565830
chr18	75107685	75107816
chr1	57921766	57921897	CCACCATGGCCTC
chr1	171889165	171889296
chr2	63978806	63978937
chr2	64804529	64804660
chr2	79994811	79994942
chr2	81932700	81932831
chr2	124584607	124584738
chr2	184919377	184919508
chr2	197524665	197524796
chr2	239362527	239362658
chr3	6232366	6232497
chr3	10003738	10003869
chr3	51586304	51586435
chr3	190445887	190446018
chr3	192983472	192983603
chr4	18406654	18406785
chr4	18849201	18849332
chr5	2688319	2688450
chr5	10322274	10322405
chr5	10368759	10368890
chr5	176177324	176177455
chr6	33935130	33935261
chr6	168831726	168831857
chr6	169421961	169422092
chr8	23319870	23320001
chr8	30955706	30955837
chr8	94970868	94970999
chr8	95013292	95013423
chr8	102847781	102847912
chr9	5656056	5656187
chr9	15368270	15368401
chr9	93724209	93724340
chr9	95620849	95620980
chr10	80553104	80553235
chr10	111591740	111591871
chr10	114448796	114448927
chr10	115288708	115288839
chr10	124177074	124177205
chr11	116588059	116588190
chr11	119781721	119781852
chr11	120251160	120251291
chr11	121085224	121085355
chr11	123138841	123138972
chr11	134796346	134796477
chr14	58317684	58317815
chr14	59748975	59749106
chr15	25047670	25047801
chr15	27984158	27984289
chr15	92933792	92933923
chr15	94447563	94447694
chr16	24018237	24018368
chr16	25174098	25174229
chr16	29524769	29524900
chr16	30264753	30264884
chr16	31784014	31784145
chr16	85943303	85943434
chr17	2787138	2787269
chr17	35604295	35604426
chr17	37665769	37665900
chr17	44526482	44526613
chr17	45753046	45753177
chr17	58465208	58465339
chr18	6601107	6601238
chr18	11784260	11784391
chr18	13830157	13830288
chr18	45179300	45179431
chr18	75693029	75693160
chr19	14300989	14301120
chr19	17126256	17126387
chr19	33864295	33864426
chr22	22239452	22239583
chrX	110368027	110368158
chr1	172019590	172019721	CCACCCTACCCCC
chr2	60693699	60693830
chr2	101945869	101946000
chr2	165846352	165846483
chr2	234788875	234789006
chr3	12580382	12580513
chr3	14490012	14490143
chr3	196714073	196714204
chr5	1346604	1346735
chr6	20810800	20810931
chr6	167985525	167985656
chr8	10279444	10279575
chr8	20970195	20970326
chr8	27955259	27955390
chr9	1663200	1663331
chr9	97140698	97140829
chr9	135728802	135728933
chr9	138178514	138178645
chr10	121090629	121090760
chr11	44311819	44311950
chr11	117053595	117053726
chr14	58136820	58136951
chr15	27071236	27071367
chr15	74726341	74726472
chr15	78541607	78541738
chr16	14842453	14842584
chr16	16240941	16241072
chr16	52183513	52183644
chr17	14214853	14214984
chr17	17055453	17055584
chr17	34420121	34420252
chr17	47120636	47120767
chr17	58076567	58076698
chr18	10838164	10838295
chrX	7422154	7422285
chrX	11720598	11720729
chrX	17416116	17416247
chr6	156528796	156528927	CCACCCTAGCCGC
chr11	45655556	45655687
chr13	31857057	31857188
chr2	61094230	61094361	CCACCCTAGCCTC
chr2	105204362	105204493
chr2	196815016	196815147
chr2	202678362	202678493
chr2	203639903	203640034
chr2	232800633	232800764
chr2	236122003	236122134
chr3	1836163	1836294
chr3	51622272	51622403
chr4	17585474	17585605
chr4	17634129	17634260
chr5	3366565	3366696
chr5	139783993	139784124
chr6	166865330	166865461
chr7	73414953	73415084
chr7	74367512	74367643
chr8	66965500	66965631
chr8	94622094	94622225
chr9	6609680	6609811
chr10	86414214	86414345
chr10	119925593	119925724
chr10	132450369	132450500
chr11	116545993	116546124
chr11	118136713	118136844
chr11	123164355	123164486
chr12	66107006	66107137
chr15	25753828	25753959
chr15	27962241	27962372
chr16	28480240	28480371
chr16	86072137	86072268
chr17	38984506	38984637
chr17	43891085	43891216
chr17	55190933	55191064
chr17	58128143	58128274
chr18	7889525	7889656
chr18	13717329	13717460
chr1	98206850	98206981	CCACCCTATCCAC
chr2	233196491	233196622
chr5	4257774	4257905
chr5	4257783	4257914
chr5	6279360	6279491
chr6	6800325	6800456
chr8	29970105	29970236
chr9	137518906	137519037
chr9	137518906	137519037
chr15	80836088	80836219
chr16	27827974	27828105
chr18	14018557	14018688
chr1	145962054	145962185	CCACCCTCACCCC
chr1	223418593	223418724
chr2	59845093	59845224
chr2	63766944	63767075
chr2	101436440	101436571
chr2	101808477	101808608
chr2	101967575	101967706
chr2	104336042	104336173
chr2	201246550	201246681
chr2	203934119	203934250
chr2	231686311	231686442
chr2	232567513	232567644
chr2	233711333	233711464
chr2	233717138	233717269
chr2	233811914	233812045
chr2	240892019	240892150
chr3	12947386	12947517
chr3	13043361	13043492
chr3	50367897	50368028
chr4	19888905	19889036
chr5	2494326	2494457
chr5	141789090	141789221
chr5	141874705	141874836
chr5	175873058	175873189
chr6	4517204	4517335
chr6	7098262	7098393
chr6	33767757	33767888
chr6	162409423	162409554
chr6	166405340	166405471
chr6	166986196	166986327
chr6	168825574	168825705
chr6	169021908	169022039
chr7	101734027	101734158
chr7	102975297	102975428
chr8	22877573	22877704
chr8	25887192	25887323
chr8	27258092	27258223
chr8	65864900	65865031
chr8	67342471	67342602
chr8	94261781	94261912
chr9	4984437	4984568
chr9	12235473	12235604
chr9	15145562	15145693
chr9	16091218	16091349
chr9	93951522	93951653
chr9	94554098	94554229
chr9	135713998	135714129
chr9	136159075	136159206
chr10	104334704	104334835
chr10	105355126	105355257
chr10	107192370	107192501
chr10	110716257	110716388
chr10	111082232	111082363
chr10	113667895	113668026
chr10	114657755	114657886
chr10	123109577	123109708
chr10	123929582	123929713
chr10	131829795	131829926
chr10	133271948	133272079
chr11	124746004	124746135
chr11	126185482	126185613
chr11	132542569	132542700
chr11	132596922	132597053
chr11	134378537	134378668
chr14	54364360	54364491
chr15	73730993	73731124
chr15	74900353	74900484
chr15	98083528	98083659
chr16	23670043	23670174
chr16	23753113	23753244
chr16	24322102	24322233
chr16	27777991	27778122
chr16	30001299	30001430
chr16	85535710	85535841
chr17	1142806	1142937
chr17	15109742	15109873
chr17	17878430	17878561
chr17	19400389	19400520
chr17	31457628	31457759
chr17	32557556	32557687
chr17	34220486	34220617
chr17	35107262	35107393
chr17	35299425	35299556
chr17	38671604	38671735
chr17	57683741	57683872
chr17	57684726	57684857
chr17	58255946	58256077
chr18	2913050	2913181
chr19	13094993	13095124
chr19	33291988	33292119
chr22	22923410	22923541
chrX	8120785	8120916
chr2	240574028	240574159	CCACCCTCACCGC
chr2	240887382	240887513
chr3	3119495	3119626
chr8	29652470	29652601
chr9	136972724	136972855
chr11	117192159	117192290
chr14	100736602	100736733
chr18	76946987	76947118
chr1	59511184	59511315	CCACCCTCACCTC
chr2	96110747	96110878
chr2	100072315	100072446
chr2	111684350	111684481
chr2	124155926	124156057
chr2	155980006	155980137
chr2	199804473	199804604
chr3	13043231	13043362
chr3	13576774	13576905
chr3	51019565	51019696
chr4	653996	654127
chr4	1533577	1533708
chr4	81736587	81736718
chr5	1077096	1077227
chr5	10652105	10652236
chr5	140548748	140548879
chr6	2123220	2123351
chr6	21059251	21059382
chr7	73713256	73713387
chr8	10914930	10915061
chr8	66345006	66345137
chr8	93597587	93597718
chr9	94779292	94779423
chr9	96129212	96129343
chr9	137233731	137233862
chr9	138051047	138051178
chr10	120488700	120488831
chr10	124713059	124713190
chr10	132442888	132443019
chr11	116612439	116612570
chr11	119935680	119935811
chr11	125209805	125209936
chr11	125330602	125330733
chr11	128825193	128825324
chr11	129854438	129854569
chr12	66260963	66261094
chr12	67027977	67028108
chr14	58715024	58715155
chr14	59143260	59143391
chr15	26866289	26866420
chr15	73701213	73701344
chr15	74344008	74344139
chr15	92953423	92953554
chr16	50638224	50638355
chr16	84352298	84352429
chr17	15087497	15087628
chr17	18710382	18710513
chr17	42820876	42821007
chr17	46835500	46835631
chr17	57081578	57081709
chr19	13004700	13004831
chr19	17260962	17261093
chr19	32643362	32643493
chr20	63491343	63491474
chrX	6619183	6619314
chrY	12924868	12924999
chr1	55675144	55675275	CCACCCTCCCCAC
chr1	58083139	58083270
chr1	58247720	58247851
chr2	60083260	60083391
chr2	84428170	84428301
chr2	101108658	101108789
chr2	103153918	103154049
chr2	103532268	103532399
chr2	112358487	112358618
chr2	124067999	124068130
chr2	179751095	179751226
chr2	202998173	202998304
chr2	203627777	203627908
chr2	238098644	238098775
chr2	239976260	239976391
chr2	240461126	240461257
chr3	14277069	14277200
chr3	50602300	50602431
chr3	195173579	195173710
chr5	5880622	5880753
chr5	6696034	6696165
chr5	7277416	7277547
chr5	11300487	11300618
chr5	140618587	140618718
chr6	1324671	1324802
chr6	33988936	33989067
chr6	75214329	75214460
chr6	158002993	158003124
chr6	167498757	167498888
chr6	168457607	168457738
chr7	42040559	42040690
chr7	75404582	75404713
chr8	21525457	21525588
chr8	28426562	28426693
chr8	65587200	65587331
chr8	66515800	66515931
chr8	66743400	66743531
chr8	94839208	94839339
chr8	96224325	96224456
chr8	100384519	100384650
chr9	9698546	9698677
chr9	92889283	92889414
chr9	94922060	94922191
chr9	97146894	97147025
chr9	135613764	135613895
chr9	135756912	135757043
chr9	137515878	137516009
chr10	84852193	84852324
chr10	105990581	105990712
chr10	124129250	124129381
chr10	126597935	126598066
chr10	132931453	132931584
chr11	119695250	119695381
chr11	121723181	121723312
chr11	126308667	126308798
chr11	134025982	134026113
chr12	66769293	66769424
chr14	58022536	58022667
chr15	27136768	27136899
chr15	31156542	31156673
chr15	78741220	78741351
chr15	78781253	78781384
chr16	23371225	23371356
chr16	24813277	24813408
chr16	49502777	49502908
chr16	51260280	51260411
chr17	1594479	1594610
chr17	17121752	17121883
chr17	18028893	18029024
chr17	19414123	19414254
chr17	19416416	19416547
chr17	58117043	58117174
chr18	3453767	3453898
chr18	7516154	7516285
chr18	12780598	12780729
chr18	45589457	45589588
chr18	45590971	45591102
chr19	14203345	14203476
chr19	16899978	16900109
chr19	34364906	34365037
chr20	63445536	63445667
chr20	64066566	64066697
chrX	17549358	17549489
chrX	32787637	32787768
chrY	24181156	24181287
chrY	25462094	25462225
chr1	98048535	98048666	CCACCCTCCCCCC
chr1	145733423	145733554
chr1	172877720	172877851
chr2	79395327	79395458
chr2	80796525	80796656
chr2	165452401	165452532
chr2	176605663	176605794
chr2	177323754	177323885
chr2	231269810	231269941
chr2	241805495	241805626
chr2	241805608	241805739
chr2	241805721	241805852
chr2	241805941	241806072
chr2	241806093	241806224
chr2	241806128	241806259
chr2	241806163	241806294
chr2	241806471	241806602
chr2	241806584	241806715
chr2	241806697	241806828
chr2	241806927	241807058
chr2	241806962	241807093
chr3	16178613	16178744
chr3	190477819	190477950
chr3	196615976	196616107
chr4	34325	34456
chr5	26829	26960
chr5	8084302	8084433
chr5	89444166	89444297
chr5	142197110	142197241
chr6	1447527	1447658
chr6	33410901	33411032
chr6	74119520	74119651
chr6	156562319	156562450
chr6	165638116	165638247
chr6	168532366	168532497
chr8	11687259	11687390
chr8	28026191	28026322
chr9	9676212	9676343
chr9	16023775	16023906
chr9	136431150	136431281
chr10	111796494	111796625
chr10	112197573	112197704
chr10	127144236	127144367
chr10	133277208	133277339
chr11	45656657	45656788
chr11	118023440	118023571
chr11	120832010	120832141
chr11	123609582	123609713
chr11	124726871	124727002
chr15	24104018	24104149
chr15	81105159	81105290
chr15	98237573	98237704
chr15	101979827	101979958
chr16	29262336	29262467
chr16	30011792	30011923
chr16	32881864	32881995
chr16	86357912	86358043
chr17	14319865	14319996
chr17	35464359	35464490
chr17	43643822	43643953
chr17	66824346	66824477
chr17	68666408	68666539
chr18	5494596	5494727
chr18	9104660	9104791
chr19	33906171	33906302
chrX	108607423	108607554
chrY	25452963	25453094
chr2	80573474	80573605	CCACCCTCCCCTC
chr2	85662300	85662431
chr2	104825992	104826123
chr3	10294329	10294460
chr3	10407082	10407213
chr3	13517484	13517615
chr3	13614324	13614455
chr3	192734050	192734181
chr5	1733274	1733405
chr5	4147463	4147594
chr6	33200688	33200819
chr6	75253050	75253181
chr6	158359086	158359217
chr6	166308264	166308395
chr6	166665413	166665544
chr7	102071486	102071617
chr7	103807553	103807684
chr8	69543317	69543448
chr8	69565957	69566088
chr8	99982888	99983019
chr9	4759349	4759480
chr9	93296097	93296228
chr9	93296125	93296256
chr9	95603931	95604062
chr9	137168213	137168344
chr10	80418110	80418241
chr10	82152739	82152870
chr10	109943595	109943726
chr10	112709392	112709523
chr10	129939204	129939335
chr11	45208637	45208768
chr11	45407506	45407637
chr11	130676887	130677018
chr11	133082315	133082446
chr11	133082450	133082581
chr12	68002364	68002495
chr13	23789734	23789865
chr13	32235737	32235868
chr15	74244510	74244641
chr15	78768687	78768818
chr15	79052837	79052968
chr15	80572430	80572561
chr16	27228489	27228620
chr16	27228545	27228676
chr16	27228601	27228732
chr16	27228657	27228788
chr16	27228713	27228844
chr16	29662855	29662986
chr16	35234555	35234686
chr16	35251983	35252114
chr17	17625009	17625140
chr17	20495477	20495608
chr17	31541291	31541422
chr17	36432156	36432287
chr17	36453302	36453433
chr17	45815300	45815431
chr18	75460822	75460953
chr19	17076528	17076659
chr19	33012553	33012684
chr20	63307117	63307248
chrX	148208965	148209096
chr1	57481278	57481409	CCACCCTCGCCCC
chr1	223142478	223142609
chr2	144517939	144518070
chr2	153477137	153477268
chr3	50204759	50204890
chr3	194487397	194487528
chr5	139847428	139847559
chr5	139904503	139904634
chr5	176628310	176628441
chr6	1607977	1608108
chr8	10291606	10291737
chr8	10568443	10568574
chr9	94588623	94588754
chr10	110460510	110460641
chr10	118670496	118670627
chr11	45181017	45181148
chr11	125378742	125378873
chr17	36731316	36731447
chr19	16867746	16867877
chr22	21933909	21934040
chr7	42186270	42186401	CCACCCTCTCCGC
chr8	96709189	96709320
chr9	136231859	136231990
chr10	129716215	129716346
chr11	128878521	128878652
chr11	130639796	130639927
chr16	86444458	86444589
chrX	153910526	153910657
chr2	200376767	200376898	CCACCCTCTCCTC
chr2	231531100	231531231
chr2	237317615	237317746
chr2	237567159	237567290
chr2	239768404	239768535
chr2	241497943	241498074
chr3	3199883	3200014
chr3	187728536	187728667
chr3	194322491	194322622
chr4	17024432	17024563
chr5	175967603	175967734
chr5	176617197	176617328
chr6	2462637	2462768
chr6	6930698	6930829
chr6	165776593	165776724
chr6	167551619	167551750
chr6	169367107	169367238
chr7	96367413	96367544
chr8	21763597	21763728
chr8	22115125	22115256
chr8	22599134	22599265
chr8	22599178	22599309
chr8	23623720	23623851
chr9	93870653	93870784
chr9	135885306	135885437
chr10	84074469	84074600
chr10	114745088	114745219
chr10	116157573	116157704
chr10	116820465	116820596
chr10	123029348	123029479
chr10	130000864	130000995
chr10	130334676	130334807
chr10	130677748	130677879
chr10	131021702	131021833
chr10	133327719	133327850
chr11	119893581	119893712
chr11	126187038	126187169
chr11	126730312	126730443
chr15	43635247	43635378
chr15	82058597	82058728
chr16	23977326	23977457
chr16	26435557	26435688
chr16	28658197	28658328
chr16	28658260	28658391
chr16	28658323	28658454
chr16	28772322	28772453
chr16	28772385	28772516
chr16	28772448	28772579
chr16	29052241	29052372
chr16	29052304	29052435
chr16	29052367	29052498
chr16	51109359	51109490
chr16	86408084	86408215
chr17	1506648	1506779
chr17	2842742	2842873
chr17	57638126	57638257
chr18	2371853	2371984
chr18	8683113	8683244
chr18	10645721	10645852
chr18	14048392	14048523
chr19	17339342	17339473
chr22	23080077	23080208
chrY	24271384	24271515
chr1	98200416	98200547	CCACCCTGACCCC
chr2	106112003	106112134
chr2	196014499	196014630
chr2	202044132	202044263
chr2	233575649	233575780
chr2	236866931	236867062
chr3	14832013	14832144
chr3	49869001	49869132
chr5	11066406	11066537
chr5	176193609	176193740
chr6	2516282	2516413
chr6	167518507	167518638
chr7	75631509	75631640
chr7	101616093	101616224
chr8	21346761	21346892
chr8	28015072	28015203
chr8	100649363	100649494
chr9	8036075	8036206
chr9	135265035	135265166
chr10	119029138	119029269
chr10	124962260	124962391
chr10	132996448	132996579
chr10	132996469	132996600
chr10	132996504	132996635
chr10	132996546	132996677
chr11	45560708	45560839
chr12	67175324	67175455
chr13	23833968	23834099
chr14	100804228	100804359
chr15	31771606	31771737
chr15	78759775	78759906
chr16	33982562	33982693
chr17	15013191	15013322
chr17	16848824	16848955
chr17	17057679	17057810
chr17	18970936	18971067
chr17	18987559	18987690
chr17	20520499	20520630
chr17	35004188	35004319
chrX	153695097	153695228
chrX	153723321	153723452
chr2	60284232	60284363	CCACCCTGACCTC
chr2	85407880	85408011
chr2	202361938	202362069
chr2	235008171	235008302
chr2	240948329	240948460
chr3	8638946	8639077
chr3	15461391	15461522
chr3	195406518	195406649
chr5	139870956	139871087
chr5	141610485	141610616
chr5	177500041	177500172
chr6	4901895	4902026
chr6	168064142	168064273
chr8	8935597	8935728
chr8	24007720	24007851
chr8	26786148	26786279
chr9	13855983	13856114
chr9	14820698	14820829
chr10	128044633	128044764
chr10	128124344	128124475
chr10	130912196	130912327
chr11	44320660	44320791
chr11	116605065	116605196
chr11	117593233	117593364
chr11	124804947	124805078
chr12	66777149	66777280
chr15	26509631	26509762
chr15	74612526	74612657
chr15	79520624	79520755
chr16	52272697	52272828
chr17	37246757	37246888
chr17	39674655	39674786
chr17	46966578	46966709
chr18	78974	79105
chr18	79044	79175
chr18	46208654	46208785
chr19	33185115	33185246
chr20	63273013	63273144
chr20	63486797	63486928
chr20	64093138	64093269
chr22	22176963	22177094
chr22	23234188	23234319
chr1	172082976	172083107	CCACCCTGCCCAC
chr2	64695159	64695290
chr2	100121151	100121282
chr2	100256690	100256821
chr2	102237381	102237512
chr2	102266631	102266762
chr2	178769490	178769621
chr2	230305714	230305845
chr2	235332467	235332598
chr2	241262972	241263103
chr4	971152	971283
chr4	1563628	1563759
chr5	1460424	1460555
chr5	6302337	6302468
chr5	8709863	8709994
chr5	10238440	10238571
chr5	135066967	135067098
chr6	4660355	4660486
chr6	33780022	33780153
chr6	167644878	167645009
chr9	92716106	92716237
chr9	97149864	97149995
chr9	135968547	135968678
chr10	86357072	86357203
chr10	131738882	131739013
chr10	132624938	132625069
chr11	45716979	45717110
chr11	117512014	117512145
chr11	117870437	117870568
chr11	124953355	124953486
chr15	75835973	75836104
chr16	15099649	15099780
chr16	21826367	21826498
chr16	28914155	28914286
chr16	32845656	32845787
chr16	35222187	35222318
chr16	85099157	85099288
chr16	85158749	85158880
chr16	85212530	85212661
chr17	18434884	18435015
chr17	44600326	44600457
chr17	58278482	58278613
chr17	58305838	58305969
chr19	12915790	12915921
chrX	103723386	103723517
chrY	19153281	19153412
chr1	56414490	56414621	CCACCCTGCCCCC
chr2	83805931	83806062
chr2	85525083	85525214
chr2	106095895	106096026
chr2	199334462	199334593
chr2	231905090	231905221
chr2	232521374	232521505
chr2	234423105	234423236
chr2	236765641	236765772
chr2	239065602	239065733
chr2	239814233	239814364
chr3	11555724	11555855
chr3	13809560	13809691
chr3	14770056	14770187
chr3	50629970	50630101
chr3	50665323	50665454
chr3	188212583	188212714
chr3	188245043	188245174
chr3	196216569	196216700
chr3	196632260	196632391
chr5	146201	146332
chr5	438880	439011
chr5	514387	514518
chr5	139857940	139858071
chr5	141257770	141257901
chr5	177231027	177231158
chr6	2971374	2971505
chr6	7025398	7025529
chr6	33888288	33888419
chr8	22561670	22561801
chr8	22622423	22622554
chr8	29681244	29681375
chr9	93722046	93722177
chr9	135678740	135678871
chr9	135709031	135709162
chr9	136358184	136358315
chr10	83366665	83366796
chr10	104514876	104515007
chr10	112575929	112576060
chr10	121470209	121470340
chr10	127930173	127930304
chr10	131204344	131204475
chr10	133656421	133656552
chr11	44457915	44458046
chr11	116739567	116739698
chr11	117303994	117304125
chr11	127400114	127400245
chr11	128684193	128684324
chr11	129544114	129544245
chr15	24169239	24169370
chr15	78776836	78776967
chr15	99447207	99447338
chr15	100464373	100464504
chr16	27499583	27499714
chr16	30664383	30664514
chr16	31135328	31135459
chr16	50681034	50681165
chr17	20095609	20095740
chr17	31451766	31451897
chr17	33239610	33239741
chr17	36476882	36477013
chr17	36820269	36820400
chr17	38605381	38605512
chr17	38872806	38872937
chr17	39011720	39011851
chr17	39738458	39738589
chr17	57665541	57665672
chr17	58417597	58417728
chr17	68636241	68636372
chr18	2179404	2179535
chr19	13072217	13072348
chr19	32968145	32968276
chr22	22297216	22297347
chrY	18673507	18673638
chr2	103984205	103984336	CCACCCTGCCCGC
chr2	231569636	231569767
chr6	73654184	73654315
chr6	157896962	157897093
chr9	93299775	93299906
chr10	113707980	113708111
chr10	133272299	133272430
chr10	133272331	133272462
chr10	133638026	133638157
chr11	119482989	119483120
chr11	130197928	130198059
chr16	35255807	35255938
chr16	85315037	85315168
chr17	1643143	1643274
chr1	57840804	57840935	CCACCCTGGCCCC
chr1	59711821	59711952
chr2	64836954	64837085
chr2	81065307	81065438
chr2	105365097	105365228
chr2	200275900	200276031
chr2	238778660	238778791
chr2	240820533	240820664
chr3	12020265	12020396
chr3	49138042	49138173
chr3	50396153	50396284
chr3	194984715	194984846
chr4	819638	819769
chr4	18004571	18004702
chr5	569017	569148
chr5	176855863	176855994
chr6	169911863	169911994
chr7	73919702	73919833
chr8	64948805	64948936
chr9	6430196	6430327
chr9	95090078	95090209
chr9	135925510	135925641
chr9	136484067	136484198
chr10	86707573	86707704
chr10	104319396	104319527
chr10	116774772	116774903
chr10	132190009	132190140
chr11	44596011	44596142
chr11	117300738	117300869
chr11	117796925	117797056
chr11	118060813	118060944
chr11	118885461	118885592
chr11	119729570	119729701
chr11	125061337	125061468
chr11	129433302	129433433
chr14	30423408	30423539
chr14	100132885	100133016
chr15	84784088	84784219
chr15	101243460	101243591
chr16	16096900	16097031
chr16	26090754	26090885
chr16	30003915	30004046
chr16	50469880	50470011
chr16	50917150	50917281
chr17	2115893	2116024
chr17	17528614	17528745
chr17	17737915	17738046
chr17	17850145	17850276
chr17	34562932	34563063
chr17	45975340	45975471
chr17	57877192	57877323
chr17	66994475	66994606
chr17	69213711	69213842
chr18	8099173	8099304
chr18	12108504	12108635
chr18	75198731	75198862
chr19	33219740	33219871
chr19	33532805	33532936
chr20	63311857	63311988
chrX	17736784	17736915
chrY	22538128	22538259
chrY	25480962	25481093
chr2	237576247	237576378	CCACCCTGGCCGC
chr2	241272231	241272362
chr9	135068096	135068227
chr9	137130072	137130203
chr15	98447191	98447322
chr16	29814974	29815105
chr16	29814974	29815105
chr17	172583	172714
chr17	17540964	17541095
chr18	14174445	14174576
chr1	59860962	59861093	CCACCCTGGCCTC
chr1	148029160	148029291
chr2	60703298	60703429
chr2	80468602	80468733
chr2	81982662	81982793
chr2	96980589	96980720
chr2	104683610	104683741
chr2	105889635	105889766
chr2	106401611	106401742
chr2	112366695	112366826
chr2	144473449	144473580
chr2	177451142	177451273
chr2	180742279	180742410
chr2	186538933	186539064
chr2	190464048	190464179
chr2	202960436	202960567
chr2	203187934	203188065
chr2	203386826	203386957
chr2	231556279	231556410
chr2	234580028	234580159
chr2	237999256	237999387
chr2	240934465	240934596
chr2	240967682	240967813
chr2	241981247	241981378
chr2	241995888	241996019
chr3	1345302	1345433
chr3	11598213	11598344
chr3	15124756	15124887
chr3	71759147	71759278
chr3	114184750	114184881
chr3	192936555	192936686
chr3	193459717	193459848
chr3	193539059	193539190
chr3	196093292	196093423
chr3	197287056	197287187
chr4	18226060	18226191
chr4	81457203	81457334
chr5	559847	559978
chr5	1556463	1556594
chr5	2676096	2676227
chr5	6083714	6083845
chr5	70953343	70953474
chr5	135022979	135023110
chr5	140580285	140580416
chr6	20987971	20988102
chr6	33729898	33730029
chr6	73272321	73272452
chr6	158289767	158289898
chr6	161372997	161373128
chr6	161450741	161450872
chr6	161849441	161849572
chr6	169982779	169982910
chr7	73309275	73309406
chr7	73687615	73687746
chr7	74671273	74671404
chr7	101628466	101628597
chr7	103330768	103330899
chr8	8586728	8586859
chr8	22426078	22426209
chr8	26452573	26452704
chr8	30250938	30251069
chr8	65670881	65671012
chr9	703178	703309
chr9	6613963	6614094
chr9	6649747	6649878
chr9	95155912	95156043
chr9	95238751	95238882
chr9	97128579	97128710
chr10	85609598	85609729
chr10	104276658	104276789
chr10	105076444	105076575
chr10	106806701	106806832
chr10	114116304	114116435
chr10	116221611	116221742
chr10	117994093	117994224
chr10	118952784	118952915
chr10	119773243	119773374
chr10	121429431	121429562
chr10	121783937	121784068
chr10	124325128	124325259
chr10	127294508	127294639
chr10	128321625	128321756
chr10	130002610	130002741
chr10	131801405	131801536
chr10	132330696	132330827
chr10	132739234	132739365
chr11	32252261	32252392
chr11	117158831	117158962
chr11	119869629	119869760
chr11	120146769	120146900
chr11	120518200	120518331
chr11	124732358	124732489
chr11	126209043	126209174
chr11	129970732	129970863
chr11	130672470	130672601
chr12	67617772	67617903
chr14	29586811	29586942
chr14	54771762	54771893
chr15	31104780	31104911
chr15	31345004	31345135
chr15	73326339	73326470
chr15	74928571	74928702
chr15	82105566	82105697
chr15	99814119	99814250
chr15	100408058	100408189
chr15	101230128	101230259
chr16	15048810	15048941
chr16	15048945	15049076
chr16	15049080	15049211
chr16	15148570	15148701
chr16	15295806	15295937
chr16	15690827	15690958
chr16	29358693	29358824
chr16	33900376	33900507
chr16	33926217	33926348
chr16	46915097	46915228
chr16	85704768	85704899
chr16	85971469	85971600
chr16	86115949	86116080
chr17	2882476	2882607
chr17	17033158	17033289
chr17	19885800	19885931
chr17	32297686	32297817
chr17	32414335	32414466
chr17	33220111	33220242
chr17	36640914	36641045
chr17	36649313	36649444
chr17	37080669	37080800
chr17	39520573	39520704
chr17	44240096	44240227
chr17	47569805	47569936
chr18	280836	280967
chr18	765584	765715
chr18	6196343	6196474
chr18	12665881	12666012
chr18	13355817	13355948
chr18	45655363	45655494
chr18	46551289	46551420
chr18	76819561	76819692
chr19	17284570	17284701
chr19	33255637	33255768
chr19	34336042	34336173
chr20	10701089	10701220
chr20	63277921	63278052
chr20	63613698	63613829
chr22	22639732	22639863
chr22	23319078	23319209
chrX	7355091	7355222
chrX	16954999	16955130
chrX	30648257	30648388
chrX	153740695	153740826
chrY	12669130	12669261
chrY	19054021	19054152
chr3	195044585	195044716	CCACCCTGTCCGC
chr4	1761282	1761413
chr8	10680794	10680925
chr8	22758723	22758854
chr1	57837280	57837411	CCACCCTTGCCCC
chr2	83739915	83740046
chr2	100978100	100978231
chr2	200171250	200171381
chr3	9908995	9909126
chr3	192543221	192543352
chr4	1750581	1750712
chr5	3075331	3075462
chr5	6704102	6704233
chr5	11385596	11385727
chr5	177330121	177330252
chr6	20810178	20810309
chr6	168860367	168860498
chr8	10111265	10111396
chr8	26098536	26098667
chr9	94609516	94609647
chr9	95462943	95463074
chr9	137112008	137112139
chr10	85962595	85962726
chr10	132448662	132448793
chr10	132448693	132448824
chr10	132448724	132448855
chr10	132448755	132448886
chr10	132448786	132448917
chr10	132448817	132448948
chr10	132448848	132448979
chr10	132448879	132449010
chr10	132448910	132449041
chr10	132448941	132449072
chr10	132448972	132449103
chr10	132449003	132449134
chr10	132449125	132449256
chr10	132449156	132449287
chr10	132449187	132449318
chr10	132449218	132449349
chr11	130604047	130604178
chr15	81687234	81687365
chr15	101297220	101297351
chr16	86242534	86242665
chr17	1518970	1519101
chr17	1606823	1606954
chr17	17363123	17363254
chr17	33200668	33200799
chr17	34580216	34580347
chr17	45177666	45177797
chr17	45679035	45679166
chr18	1204838	1204969
chr18	4041612	4041743
chr18	41835056	41835187
chr20	63311796	63311927
chrX	11213123	11213254
chr2	240411628	240411759	CCACCCTTGCCGC
chr9	880749	880880
chr17	45237428	45237559
chr2	240453019	240453150	CCACCGTACCCGC
chr9	136446779	136446910
chr2	183072261	183072392	CCACCGTAGCCTC
chr5	604166	604297
chr5	90493298	90493429
chr6	2413729	2413860
chr7	73216752	73216883
chr7	74770146	74770277
chr9	846594	846725
chr15	23937817	23937948
chr15	50467743	50467874
chr17	38841336	38841467
chr18	372469	372600
chr1	98173917	98174048	CCACCGTCCCCAC
chr2	152839023	152839154
chr2	237598098	237598229
chr2	237598140	237598271
chr3	8306175	8306306
chr3	9194873	9195004
chr5	6544730	6544861
chr6	166464835	166464966
chr10	116783486	116783617
chr15	98402902	98403033
chr15	101439429	101439560
chr16	29308295	29308426
chr16	50520516	50520647
chr20	63281311	63281442
chrX	153723731	153723862
chr2	96157412	96157543	CCACCGTCCCCCC
chr8	22741686	22741817
chr9	93289257	93289388
chr9	137841105	137841236
chr9	137841336	137841467
chr9	137841438	137841569
chr9	137841463	137841594
chr9	137841488	137841619
chr9	137841513	137841644
chr9	137841640	137841771
chr9	137841665	137841796
chr9	137841690	137841821
chr9	137842051	137842182
chr9	137842154	137842285
chr9	137842179	137842310
chr9	137842337	137842468
chr9	137842569	137842700
chr10	130015826	130015957
chr5	140639288	140639419	CCACCGTCCCCGC
chr5	176543932	176544063
chr6	167117136	167117267
chr6	167131604	167131735
chr6	169226059	169226190
chr9	136527450	136527581
chr9	137295878	137296009
chr9	137295896	137296027
chr10	104180675	104180806
chr14	55524358	55524489
chr14	58638012	58638143
chr15	101746643	101746774
chr17	56914399	56914530
chr1	58150778	58150909	CCACCGTCCCCTC
chr3	12497017	12497148
chr5	1172099	1172230
chr6	1625379	1625510
chr7	75419742	75419873
chr9	14316004	14316135
chr9	136679420	136679551
chr9	136713128	136713259
chr10	129054716	129054847
chr10	132255824	132255955
chr11	125346821	125346952
chr16	22155268	22155399
chr16	22155268	22155399
chr17	31901753	31901884
chr18	9614060	9614191
chr22	22933367	22933498
chr2	197705568	197705699	CCACCGTCGCCTC
chr9	136324503	136324634
chr15	78768352	78768483
chr17	44959587	44959718
chr9	137466721	137466852	CCACCGTCTCCAC
chr9	137466819	137466950
chr9	137466868	137466999
chr9	137466917	137467048
chr9	137467015	137467146
chr10	123556000	123556131
chr10	124394578	124394709
chr11	134840816	134840947
chr17	1940417	1940548
chr2	232933255	232933386	CCACCGTCTCCCC
chr2	239695815	239695946
chr3	13487295	13487426
chr5	474981	475112
chr8	101153339	101153470
chr9	135119534	135119665
chr10	113632997	113633128
chr11	119707468	119707599
chr14	56804433	56804564
chr15	78279186	78279317
chr15	100214117	100214248
chr20	64129341	64129472
chr3	71753360	71753491	CCACCGTGACCCC
chr5	1162445	1162576
chr10	131093034	131093165
chr15	82094560	82094691
chr17	18677719	18677850
chr17	36934441	36934572
chr20	63319453	63319584
chr3	2648623	2648754	CCACCGTGGCCCC
chr3	49896782	49896913
chr9	470661	470792
chr9	93011115	93011246
chr9	137386559	137386690
chr9	137449487	137449618
chr10	80161451	80161582
chr10	119652171	119652302
chr10	129926925	129927056
chrY	12474349	12474480
chr2	85305125	85305256	CCACCGTGTCCTC
chr2	189728529	189728660
chr3	1089361	1089492
chr3	1089361	1089492
chr4	1380799	1380930
chr5	2381434	2381565
chr5	3393380	3393511
chr8	23456246	23456377
chr10	86374883	86375014
chr11	130373632	130373763
chr16	29336390	29336521
chr16	86138629	86138760
chr17	17525371	17525502
chr17	35936678	35936809
chr20	63635823	63635954
chrX	148436819	148436950
chr10	123094037	123094168	CCACCGTTCCCAC
chr10	132965098	132965229
chr10	132965200	132965331
chr10	132965233	132965364
chr10	132965335	132965466
chr10	132965437	132965568
chr15	96347199	96347330
chr16	30360881	30361012
chr3	6861281	6861412	CCACCGTTCCCTC
chr3	196663293	196663424
chr5	8840540	8840671
chr11	118340445	118340576
chr2	107146626	107146757	CCACCGTTGCCTC
chr8	10790885	10791016
chr9	93684381	93684512
chr15	74099408	74099539
chr15	74099408	74099539
chr17	45436321	45436452
chr6	169395455	169395586	CCACCGTTTCCAC
chr10	110393660	110393791
chr17	36698053	36698184
chr2	110589721	110589852	CCACCGTTTCCTC
chr2	235534641	235534772
chr4	1985764	1985895
chr5	7596295	7596426
chr17	20444870	20445001
chr1	209751760	209751891	CCACCTTCACCCC
chr2	86304658	86304789
chr2	96305198	96305329
chr2	111185290	111185421
chr2	202053451	202053582
chr2	239869483	239869614
chr3	187913569	187913700
chr3	193464280	193464411
chr5	6476887	6477018
chr6	167778440	167778571
chr8	28891407	28891538
chr10	86248181	86248312
chr10	117982902	117983033
chr10	118251231	118251362
chr10	119085340	119085471
chr10	132888254	132888385
chr10	132888282	132888413
chr10	132888310	132888441
chr10	132888385	132888516
chr10	132888413	132888544
chr10	132888456	132888587
chr10	132888484	132888615
chr10	132888544	132888675
chr10	132888602	132888733
chr10	132888630	132888761
chr10	132888673	132888804
chr10	132888688	132888819
chr10	132888716	132888847
chr10	132888744	132888875
chr10	132888772	132888903
chr10	132888800	132888931
chr10	132888828	132888959
chr11	134835271	134835402
chr15	30802742	30802873
chr15	36924855	36924986
chr15	73320055	73320186
chr15	79830540	79830671
chr15	85199913	85200044
chr15	96335979	96336110
chr15	101372568	101372699
chr16	85610951	85611082
chr17	1629633	1629764
chr17	34026145	34026276
chr18	8803622	8803753
chrX	8108768	8108899
chr1	223090415	223090546	CCACCTTCACCTC
chr2	189040174	189040305
chr2	230459001	230459132
chr2	230660225	230660356
chr2	234307988	234308119
chr2	240402666	240402797
chr2	240812471	240812602
chr2	240812599	240812730
chr2	240812636	240812767
chr2	240812751	240812882
chr2	240812902	240813033
chr3	13247121	13247252
chr3	196484533	196484664
chr5	4666525	4666656
chr5	89652427	89652558
chr5	139769623	139769754
chr5	140780738	140780869
chr6	3508031	3508162
chr6	5634510	5634641
chr7	75145910	75146041
chr7	96451404	96451535
chr7	104782709	104782840
chr8	23792832	23792963
chr8	100011296	100011427
chr9	95812582	95812713
chr10	104191432	104191563
chr10	104322138	104322269
chr10	113593396	113593527
chr10	121733100	121733231
chr10	132476223	132476354
chr11	45455390	45455521
chr11	125911528	125911659
chr14	57052317	57052448
chr15	32215016	32215147
chr15	78157849	78157980
chr15	94667326	94667457
chr15	98677123	98677254
chr15	101717043	101717174
chr16	14923781	14923912
chr16	16322432	16322563
chr16	16362461	16362592
chr16	28425223	28425354
chr16	50271293	50271424
chr17	15454717	15454848
chr17	33706410	33706541
chr17	58303181	58303312
chr17	67959605	67959736
chr18	264967	265098
chr18	1611519	1611650
chr18	44959931	44960062
chr18	76245014	76245145
chr22	21902535	21902666
chr2	96132348	96132479	CCACCTTCCCCAC
chr2	165896901	165897032
chr2	197591074	197591205
chr2	204142684	204142815
chr2	230668210	230668341
chr2	235955841	235955972
chr2	240183547	240183678
chr3	2957535	2957666
chr3	5813151	5813282
chr3	190637718	190637849
chr3	196320305	196320436
chr3	197699947	197700078
chr5	647105	647236
chr6	801790	801921
chr6	5030285	5030416
chr6	165976815	165976946
chr8	26346023	26346154
chr8	29361218	29361349
chr8	96554972	96555103
chr9	93291622	93291753
chr9	138106212	138106343
chr10	80473473	80473604
chr10	84576160	84576291
chr10	116881552	116881683
chr10	120629034	120629165
chr10	124129293	124129424
chr11	116328970	116329101
chr11	117477932	117478063
chr11	118131528	118131659
chr11	119964438	119964569
chr11	120917781	120917912
chr11	134521421	134521552
chr12	67946667	67946798
chr14	54306698	54306829
chr15	25207779	25207910
chr15	25793402	25793533
chr15	25831022	25831153
chr15	36254989	36255120
chr16	22181622	22181753
chr16	22225935	22226066
chr16	22268933	22269064
chr16	25654178	25654309
chr16	26949632	26949763
chr16	30058065	30058196
chr16	51958113	51958244
chr16	52666291	52666422
chr17	7911610	7911741
chr17	36668216	36668347
chr17	43803097	43803228
chr17	45031312	45031443
chr17	58249242	58249373
chr18	7354496	7354627
chr18	13482333	13482464
chr18	45626545	45626676
chr18	45980286	45980417
chr18	46273625	46273756
chr18	46276351	46276482
chr18	46426281	46426412
chr18	76253395	76253526
chr19	16736969	16737100
chr19	16749059	16749190
chr19	32839984	32840115
chrY	21927490	21927621
chrY	23537277	23537408
chr1	56499024	56499155	CCACCTTCCCCCC
chr2	85598209	85598340
chr2	96120523	96120654
chr2	154148011	154148142
chr2	154708489	154708620
chr2	187494113	187494244
chr3	5096740	5096871
chr3	8311061	8311192
chr3	105504582	105504713
chr3	195811473	195811604
chr4	1722046	1722177
chr5	239587	239718
chr5	90155933	90156064
chr6	168468384	168468515
chr8	76448534	76448665
chr9	137841080	137841211
chr10	114877933	114878064
chr11	119483368	119483499
chr11	131186179	131186310
chr15	22916058	22916189
chr15	73751894	73752025
chr16	28018619	28018750
chr16	50302490	50302621
chr17	32042108	32042239
chr17	45115242	45115373
chr17	54808503	54808634
chr18	46394443	46394574
chrX	153779152	153779283
chr1	148161153	148161284	CCACCTTCCCCTC
chr1	244701142	244701273
chr2	59968468	59968599
chr2	96661174	96661305
chr2	177285505	177285636
chr2	203414121	203414252
chr3	4831490	4831621
chr3	15050702	15050833
chr3	49383515	49383646
chr3	50127218	50127349
chr5	141781909	141782040
chr5	176632757	176632888
chr6	5033010	5033141
chr6	73362970	73363101
chr6	166002323	166002454
chr6	166162815	166162946
chr6	168433956	168434087
chr7	73768675	73768806
chr8	23943614	23943745
chr8	28166160	28166291
chr8	95121147	95121278
chr8	100423355	100423486
chr9	6605113	6605244
chr9	8540642	8540773
chr9	135734231	135734362
chr10	120659684	120659815
chr10	131573896	131574027
chr11	45471324	45471455
chr11	128622425	128622556
chr15	25830180	25830311
chr15	26725293	26725424
chr15	26989704	26989835
chr15	27179214	27179345
chr15	73990481	73990612
chr15	97979561	97979692
chr16	28145285	28145416
chr16	52479891	52480022
chr17	35750580	35750711
chr17	36544827	36544958
chr19	17505483	17505614
chr20	64177718	64177849
chr2	65276926	65277057	CCACCTTCGCCCC
chr5	1482796	1482927
chr7	76224937	76225068
chr11	130459825	130459956
chr16	30776003	30776134
chr17	56944053	56944184
chr17	68246419	68246550
chr19	34999903	35000034
chr22	22235224	22235355
chr1	59959244	59959375	CCACCTTCTCCAC
chr1	148260494	148260625
chr2	57463789	57463920
chr3	6481715	6481846
chr3	10429061	10429192
chr3	12114727	12114858
chr3	50434301	50434432
chr3	195898144	195898275
chr3	196794493	196794624
chr4	17911634	17911765
chr5	3202587	3202718
chr5	141851871	141852002
chr6	4709046	4709177
chr6	72659881	72660012
chr6	165686817	165686948
chr8	29404226	29404357
chr8	93597196	93597327
chr9	399905	400036
chr9	10446054	10446185
chr10	85776368	85776499
chr10	109875409	109875540
chr10	111184951	111185082
chr10	131089686	131089817
chr10	131546379	131546510
chr11	32313369	32313500
chr11	133967269	133967400
chr12	67773031	67773162
chr14	100429693	100429824
chr15	25478376	25478507
chr15	94667174	94667305
chr15	96281483	96281614
chr16	29600623	29600754
chr16	29600675	29600806
chr16	29600779	29600910
chr16	29600857	29600988
chr16	33912836	33912967
chr17	17788430	17788561
chr17	31476967	31477098
chr17	34998111	34998242
chr17	37702994	37703125
chr17	46812078	46812209
chr17	46826153	46826284
chr18	4804206	4804337
chr18	13867837	13867968
chr18	46477523	46477654
chr18	46524753	46524884
chrX	153920563	153920694
chr1	209796259	209796390	CCACCTTCTCCCC
chr2	83885856	83885987
chr2	177075716	177075847
chr2	199020731	199020862
chr2	235303858	235303989
chr3	11054819	11054950
chr5	371993	372124
chr6	3159683	3159814
chr6	4280967	4281098
chr6	21101852	21101983
chr6	33794743	33794874
chr6	167304886	167305017
chr7	101952660	101952791
chr7	155806942	155807073
[truncated: 12,840 more rows]

## Sheet: SIR(HJs)
chr1	8533098	8533106	CCTTTAAAGG
chr1	11866311	11866319	CCTTTAAAGG
chr1	14099783	14099791	CCTTTAAAGG
chr1	16901599	16901607	CCTTTAAAGG
chr1	24181445	24181453	CCTTTAAAGG
chr1	33238686	33238694	CCTTTAAAGG
chr1	34174575	34174583	CCTTTAAAGG
chr1	37714630	37714638	CCTTTAAAGG
chr1	42619688	42619696	CCTTTAAAGG
chr1	49276600	49276608	CCTTTAAAGG
chr1	61791118	61791126	CCTTTAAAGG
chr1	68468295	68468303	CCTTTAAAGG
chr1	71316681	71316689	CCTTTAAAGG
chr1	73311120	73311128	CCTTTAAAGG
chr1	75845101	75845109	CCTTTAAAGG
chr1	75867581	75867589	CCTTTAAAGG
chr1	78522291	78522299	CCTTTAAAGG
chr1	79805697	79805705	CCTTTAAAGG
chr1	85710372	85710380	CCTTTAAAGG
chr1	85710372	85710380	CCTTTAAAGG
chr1	87453808	87453816	CCTTTAAAGG
chr1	94400875	94400883	CCTTTAAAGG
chr1	98684565	98684573	CCTTTAAAGG
chr1	103652798	103652806	CCTTTAAAGG
chr1	103652798	103652806	CCTTTAAAGG
chr1	103699165	103699173	CCTTTAAAGG
chr1	103699165	103699173	CCTTTAAAGG
chr1	103746936	103746944	CCTTTAAAGG
chr1	103746936	103746944	CCTTTAAAGG
chr1	118233338	118233346	CCTTTAAAGG
chr1	119260240	119260248	CCTTTAAAGG
chr1	156187976	156187984	CCTTTAAAGG
chr1	160912259	160912267	CCTTTAAAGG
chr1	164909474	164909482	CCTTTAAAGG
chr1	170263552	170263560	CCTTTAAAGG
chr1	175298895	175298903	CCTTTAAAGG
chr1	185584603	185584611	CCTTTAAAGG
chr1	199813330	199813338	CCTTTAAAGG
chr1	201519286	201519294	CCTTTAAAGG
chr1	204675598	204675606	CCTTTAAAGG
chr1	209158882	209158890	CCTTTAAAGG
chr1	211855410	211855418	CCTTTAAAGG
chr1	212491996	212492004	CCTTTAAAGG
chr1	224816128	224816136	CCTTTAAAGG
chr1	225223424	225223432	CCTTTAAAGG
chr1	230833628	230833636	CCTTTAAAGG
chr1	232796709	232796717	CCTTTAAAGG
chr1	233654006	233654014	CCTTTAAAGG
chr1	235532197	235532205	CCTTTAAAGG
chr1	237580715	237580723	CCTTTAAAGG
chr1	238024993	238025001	CCTTTAAAGG
chr1	239184453	239184461	CCTTTAAAGG
chr1	242321244	242321252	CCTTTAAAGG
chr1	242865216	242865224	CCTTTAAAGG
chr2	16976555	16976563	CCTTTAAAGG
chr2	23455886	23455894	CCTTTAAAGG
chr2	29987944	29987952	CCTTTAAAGG
chr2	33423569	33423577	CCTTTAAAGG
chr2	48920817	48920825	CCTTTAAAGG
chr2	51096774	51096782	CCTTTAAAGG
chr2	53416268	53416276	CCTTTAAAGG
chr2	64421876	64421884	CCTTTAAAGG
chr2	65710555	65710563	CCTTTAAAGG
chr2	71391034	71391042	CCTTTAAAGG
chr2	71992164	71992172	CCTTTAAAGG
chr2	96987791	96987799	CCTTTAAAGG
chr2	98769102	98769110	CCTTTAAAGG
chr2	103411685	103411693	CCTTTAAAGG
chr2	119530344	119530352	CCTTTAAAGG
chr2	119530344	119530352	CCTTTAAAGG
chr2	122841821	122841829	CCTTTAAAGG
chr2	126420766	126420774	CCTTTAAAGG
chr2	127005626	127005634	CCTTTAAAGG
chr2	128036290	128036298	CCTTTAAAGG
chr2	128223154	128223162	CCTTTAAAGG
chr2	128223154	128223162	CCTTTAAAGG
chr2	129505970	129505978	CCTTTAAAGG
chr2	129710512	129710520	CCTTTAAAGG
chr2	132145047	132145055	CCTTTAAAGG
chr2	133895933	133895941	CCTTTAAAGG
chr2	152392676	152392684	CCTTTAAAGG
chr2	152703794	152703802	CCTTTAAAGG
chr2	154534923	154534931	CCTTTAAAGG
chr2	157083120	157083128	CCTTTAAAGG
chr2	158244666	158244674	CCTTTAAAGG
chr2	166611136	166611144	CCTTTAAAGG
chr2	167475436	167475444	CCTTTAAAGG
chr2	169051053	169051061	CCTTTAAAGG
chr2	170114906	170114914	CCTTTAAAGG
chr2	171278383	171278391	CCTTTAAAGG
chr2	172290140	172290148	CCTTTAAAGG
chr2	173501383	173501391	CCTTTAAAGG
chr2	173501383	173501391	CCTTTAAAGG
chr2	176265397	176265405	CCTTTAAAGG
chr2	183454793	183454801	CCTTTAAAGG
chr2	186308162	186308170	CCTTTAAAGG
chr2	195861104	195861112	CCTTTAAAGG
chr2	203546328	203546336	CCTTTAAAGG
chr2	210698229	210698237	CCTTTAAAGG
chr2	211269789	211269797	CCTTTAAAGG
chr2	211269789	211269797	CCTTTAAAGG
chr2	211817744	211817752	CCTTTAAAGG
chr2	215560542	215560550	CCTTTAAAGG
chr2	220782725	220782733	CCTTTAAAGG
chr2	224728020	224728028	CCTTTAAAGG
chr2	228307868	228307876	CCTTTAAAGG
chr2	229306554	229306562	CCTTTAAAGG
chr2	231095961	231095969	CCTTTAAAGG
chr2	234749771	234749779	CCTTTAAAGG
chr2	234898040	234898048	CCTTTAAAGG
chr3	4896283	4896291	CCTTTAAAGG
chr3	6260224	6260232	CCTTTAAAGG
chr3	6260224	6260232	CCTTTAAAGG
chr3	11987011	11987019	CCTTTAAAGG
chr3	12674532	12674540	CCTTTAAAGG
chr3	16153070	16153078	CCTTTAAAGG
chr3	29741953	29741961	CCTTTAAAGG
chr3	37561079	37561087	CCTTTAAAGG
chr3	38674740	38674748	CCTTTAAAGG
chr3	43602026	43602034	CCTTTAAAGG
chr3	51861356	51861364	CCTTTAAAGG
chr3	56568068	56568076	CCTTTAAAGG
chr3	60805862	60805870	CCTTTAAAGG
chr3	63179737	63179745	CCTTTAAAGG
chr3	65345068	65345076	CCTTTAAAGG
chr3	73858630	73858638	CCTTTAAAGG
chr3	95340387	95340395	CCTTTAAAGG
chr3	96776208	96776216	CCTTTAAAGG
chr3	101637970	101637978	CCTTTAAAGG
chr3	106010468	106010476	CCTTTAAAGG
chr3	107262880	107262888	CCTTTAAAGG
chr3	108019325	108019333	CCTTTAAAGG
chr3	113091206	113091214	CCTTTAAAGG
chr3	123147325	123147333	CCTTTAAAGG
chr3	126064921	126064929	CCTTTAAAGG
chr3	128367163	128367171	CCTTTAAAGG
chr3	130473898	130473906	CCTTTAAAGG
chr3	136848144	136848152	CCTTTAAAGG
chr3	141686448	141686456	CCTTTAAAGG
chr3	143222742	143222750	CCTTTAAAGG
chr3	147962134	147962142	CCTTTAAAGG
chr3	148821188	148821196	CCTTTAAAGG
chr3	164468530	164468538	CCTTTAAAGG
chr3	178605539	178605547	CCTTTAAAGG
chr3	178998452	178998460	CCTTTAAAGG
chr3	179012551	179012559	CCTTTAAAGG
chr3	179868665	179868673	CCTTTAAAGG
chr3	187508867	187508875	CCTTTAAAGG
chr3	187508867	187508875	CCTTTAAAGG
chr3	188514947	188514955	CCTTTAAAGG
chr3	193605990	193605998	CCTTTAAAGG
chr3	195718628	195718636	CCTTTAAAGG
chr4	96091	96099	CCTTTAAAGG
chr4	8407463	8407471	CCTTTAAAGG
chr4	8559525	8559533	CCTTTAAAGG
chr4	13239254	13239262	CCTTTAAAGG
chr4	13239254	13239262	CCTTTAAAGG
chr4	13971361	13971369	CCTTTAAAGG
chr4	13971361	13971369	CCTTTAAAGG
chr4	25361167	25361175	CCTTTAAAGG
chr4	25994284	25994292	CCTTTAAAGG
chr4	25994284	25994292	CCTTTAAAGG
chr4	28286416	28286424	CCTTTAAAGG
chr4	28580637	28580645	CCTTTAAAGG
chr4	36895235	36895243	CCTTTAAAGG
chr4	45988456	45988464	CCTTTAAAGG
chr4	58216669	58216677	CCTTTAAAGG
chr4	63487476	63487484	CCTTTAAAGG
chr4	64205525	64205533	CCTTTAAAGG
chr4	64624250	64624258	CCTTTAAAGG
chr4	65462835	65462843	CCTTTAAAGG
chr4	67367226	67367234	CCTTTAAAGG
chr4	69950985	69950993	CCTTTAAAGG
chr4	80946428	80946436	CCTTTAAAGG
chr4	88352459	88352467	CCTTTAAAGG
chr4	89376871	89376879	CCTTTAAAGG
chr4	89705863	89705871	CCTTTAAAGG
chr4	90788446	90788454	CCTTTAAAGG
chr4	106111151	106111159	CCTTTAAAGG
chr4	108525977	108525985	CCTTTAAAGG
chr4	115457989	115457997	CCTTTAAAGG
chr4	115581176	115581184	CCTTTAAAGG
chr4	123378987	123378995	CCTTTAAAGG
chr4	125543282	125543290	CCTTTAAAGG
chr4	130593338	130593346	CCTTTAAAGG
chr4	131428856	131428864	CCTTTAAAGG
chr4	133994280	133994288	CCTTTAAAGG
chr4	137486906	137486914	CCTTTAAAGG
chr4	139153983	139153991	CCTTTAAAGG
chr4	141110314	141110322	CCTTTAAAGG
chr4	143854649	143854657	CCTTTAAAGG
chr4	143975552	143975560	CCTTTAAAGG
chr4	144078754	144078762	CCTTTAAAGG
chr4	147415920	147415928	CCTTTAAAGG
chr4	147569518	147569526	CCTTTAAAGG
chr4	155181528	155181536	CCTTTAAAGG
chr4	155181528	155181536	CCTTTAAAGG
chr4	156173904	156173912	CCTTTAAAGG
chr4	158294132	158294140	CCTTTAAAGG
chr4	178424202	178424210	CCTTTAAAGG
chr4	178507091	178507099	CCTTTAAAGG
chr4	184342054	184342062	CCTTTAAAGG
chr4	188699875	188699883	CCTTTAAAGG
chr5	6562369	6562377	CCTTTAAAGG
chr5	9528575	9528583	CCTTTAAAGG
chr5	11065947	11065955	CCTTTAAAGG
chr5	13270611	13270619	CCTTTAAAGG
chr5	13504566	13504574	CCTTTAAAGG
chr5	16588395	16588403	CCTTTAAAGG
chr5	21953092	21953100	CCTTTAAAGG
chr5	24428352	24428360	CCTTTAAAGG
chr5	28961288	28961296	CCTTTAAAGG
chr5	29898527	29898535	CCTTTAAAGG
chr5	38206317	38206325	CCTTTAAAGG
chr5	42958303	42958311	CCTTTAAAGG
chr5	43562561	43562569	CCTTTAAAGG
chr5	44154962	44154970	CCTTTAAAGG
chr5	50986608	50986616	CCTTTAAAGG
chr5	64224799	64224807	CCTTTAAAGG
chr5	65541714	65541722	CCTTTAAAGG
chr5	67555788	67555796	CCTTTAAAGG
chr5	69963214	69963222	CCTTTAAAGG
chr5	70154954	70154962	CCTTTAAAGG
chr5	70154954	70154962	CCTTTAAAGG
chr5	70838285	70838293	CCTTTAAAGG
chr5	71155267	71155275	CCTTTAAAGG
chr5	71155267	71155275	CCTTTAAAGG
chr5	79810994	79811002	CCTTTAAAGG
chr5	80602474	80602482	CCTTTAAAGG
chr5	80602474	80602482	CCTTTAAAGG
chr5	91349399	91349407	CCTTTAAAGG
chr5	95087455	95087463	CCTTTAAAGG
chr5	112491090	112491098	CCTTTAAAGG
chr5	117939920	117939928	CCTTTAAAGG
chr5	124265434	124265442	CCTTTAAAGG
chr5	126514937	126514945	CCTTTAAAGG
chr5	126514937	126514945	CCTTTAAAGG
chr5	129077625	129077633	CCTTTAAAGG
chr5	133688001	133688009	CCTTTAAAGG
chr5	134591054	134591062	CCTTTAAAGG
chr5	140311175	140311183	CCTTTAAAGG
chr5	145003105	145003113	CCTTTAAAGG
chr5	159373731	159373739	CCTTTAAAGG
chr5	163200470	163200478	CCTTTAAAGG
chr5	163650128	163650136	CCTTTAAAGG
chr5	166934949	166934957	CCTTTAAAGG
chr5	169502658	169502666	CCTTTAAAGG
chr5	170440019	170440027	CCTTTAAAGG
chr5	173654405	173654413	CCTTTAAAGG
chr5	175178574	175178582	CCTTTAAAGG
chr5	180274379	180274387	CCTTTAAAGG
chr5	181144634	181144642	CCTTTAAAGG
chr6	1463414	1463422	CCTTTAAAGG
chr6	6992476	6992484	CCTTTAAAGG
chr6	8158052	8158060	CCTTTAAAGG
chr6	17088730	17088738	CCTTTAAAGG
chr6	18327664	18327672	CCTTTAAAGG
chr6	20523088	20523096	CCTTTAAAGG
chr6	22120236	22120244	CCTTTAAAGG
chr6	23163820	23163828	CCTTTAAAGG
chr6	26264919	26264927	CCTTTAAAGG
chr6	29583893	29583901	CCTTTAAAGG
chr6	31469407	31469415	CCTTTAAAGG
chr6	38680232	38680240	CCTTTAAAGG
chr6	47370835	47370843	CCTTTAAAGG
chr6	49890115	49890123	CCTTTAAAGG
chr6	57071213	57071221	CCTTTAAAGG
chr6	61174139	61174147	CCTTTAAAGG
chr6	67859271	67859279	CCTTTAAAGG
chr6	67859271	67859279	CCTTTAAAGG
chr6	69894643	69894651	CCTTTAAAGG
chr6	71485243	71485251	CCTTTAAAGG
chr6	71485243	71485251	CCTTTAAAGG
chr6	78135827	78135835	CCTTTAAAGG
chr6	79173622	79173630	CCTTTAAAGG
chr6	83976351	83976359	CCTTTAAAGG
chr6	83976351	83976359	CCTTTAAAGG
chr6	84044715	84044723	CCTTTAAAGG
chr6	86501358	86501366	CCTTTAAAGG
chr6	86501358	86501366	CCTTTAAAGG
chr6	95931400	95931408	CCTTTAAAGG
chr6	109688314	109688322	CCTTTAAAGG
chr6	116232207	116232215	CCTTTAAAGG
chr6	124762375	124762383	CCTTTAAAGG
chr6	127530460	127530468	CCTTTAAAGG
chr6	138733906	138733914	CCTTTAAAGG
chr6	140897778	140897786	CCTTTAAAGG
chr6	147990138	147990146	CCTTTAAAGG
chr6	156134310	156134318	CCTTTAAAGG
chr6	160299651	160299659	CCTTTAAAGG
chr7	12299843	12299851	CCTTTAAAGG
chr7	12299843	12299851	CCTTTAAAGG
chr7	16034933	16034941	CCTTTAAAGG
chr7	17134338	17134346	CCTTTAAAGG
chr7	17134338	17134346	CCTTTAAAGG
chr7	24081038	24081046	CCTTTAAAGG
chr7	32578260	32578268	CCTTTAAAGG
chr7	33080634	33080642	CCTTTAAAGG
chr7	39507382	39507390	CCTTTAAAGG
chr7	43219535	43219543	CCTTTAAAGG
chr7	43824471	43824479	CCTTTAAAGG
chr7	45256152	45256160	CCTTTAAAGG
chr7	46533660	46533668	CCTTTAAAGG
chr7	66310135	66310143	CCTTTAAAGG
chr7	66310135	66310143	CCTTTAAAGG
chr7	71847159	71847167	CCTTTAAAGG
chr7	87327437	87327445	CCTTTAAAGG
chr7	87327437	87327445	CCTTTAAAGG
chr7	87328658	87328666	CCTTTAAAGG
chr7	106063402	106063410	CCTTTAAAGG
chr7	118116968	118116976	CCTTTAAAGG
chr7	118238929	118238937	CCTTTAAAGG
chr7	121476173	121476181	CCTTTAAAGG
chr7	127775202	127775210	CCTTTAAAGG
chr7	136648245	136648253	CCTTTAAAGG
chr7	143127171	143127179	CCTTTAAAGG
chr8	5856108	5856116	CCTTTAAAGG
chr8	5856108	5856116	CCTTTAAAGG
chr8	5878287	5878295	CCTTTAAAGG
chr8	6046820	6046828	CCTTTAAAGG
chr8	9801185	9801193	CCTTTAAAGG
chr8	11551474	11551482	CCTTTAAAGG
chr8	13733869	13733877	CCTTTAAAGG
chr8	16282280	16282288	CCTTTAAAGG
chr8	33934649	33934657	CCTTTAAAGG
chr8	37286541	37286549	CCTTTAAAGG
chr8	41606846	41606854	CCTTTAAAGG
chr8	46652919	46652927	CCTTTAAAGG
chr8	53418047	53418055	CCTTTAAAGG
chr8	53418047	53418055	CCTTTAAAGG
chr8	58698735	58698743	CCTTTAAAGG
chr8	61042936	61042944	CCTTTAAAGG
chr8	68472394	68472402	CCTTTAAAGG
chr8	78160907	78160915	CCTTTAAAGG
chr8	82240393	82240401	CCTTTAAAGG
chr8	83764612	83764620	CCTTTAAAGG
chr8	85831642	85831650	CCTTTAAAGG
chr8	96094957	96094965	CCTTTAAAGG
chr8	100646433	100646441	CCTTTAAAGG
chr8	100974770	100974778	CCTTTAAAGG
chr8	106260178	106260186	CCTTTAAAGG
chr8	107770805	107770813	CCTTTAAAGG
chr8	110530605	110530613	CCTTTAAAGG
chr8	111065116	111065124	CCTTTAAAGG
chr8	112053021	112053029	CCTTTAAAGG
chr8	112770258	112770266	CCTTTAAAGG
chr8	114654706	114654714	CCTTTAAAGG
chr8	118598286	118598294	CCTTTAAAGG
chr8	119319094	119319102	CCTTTAAAGG
chr8	134932898	134932906	CCTTTAAAGG
chr8	135112519	135112527	CCTTTAAAGG
chr9	1671216	1671224	CCTTTAAAGG
chr9	3604399	3604407	CCTTTAAAGG
chr9	19130367	19130375	CCTTTAAAGG
chr9	21736305	21736313	CCTTTAAAGG
chr9	21736305	21736313	CCTTTAAAGG
chr9	23424574	23424582	CCTTTAAAGG
chr9	27596364	27596372	CCTTTAAAGG
chr9	27850419	27850427	CCTTTAAAGG
chr9	40752380	40752388	CCTTTAAAGG
chr9	64875984	64875992	CCTTTAAAGG
chr9	70517776	70517784	CCTTTAAAGG
chr9	81524254	81524262	CCTTTAAAGG
chr9	95716795	95716803	CCTTTAAAGG
chr9	102146296	102146304	CCTTTAAAGG
chr9	118588581	118588589	CCTTTAAAGG
chr9	119095399	119095407	CCTTTAAAGG
chr9	125424800	125424808	CCTTTAAAGG
chr9	129309282	129309290	CCTTTAAAGG
chr9	135379447	135379455	CCTTTAAAGG
chr9	135379447	135379455	CCTTTAAAGG
chr9	135379447	135379455	CCTTTAAAGG
chr10	4943634	4943642	CCTTTAAAGG
chr10	5018503	5018511	CCTTTAAAGG
chr10	29087540	29087548	CCTTTAAAGG
chr10	29087540	29087548	CCTTTAAAGG
chr10	38277548	38277556	CCTTTAAAGG
chr10	38973178	38973186	CCTTTAAAGG
chr10	39204761	39204769	CCTTTAAAGG
chr10	39204761	39204769	CCTTTAAAGG
chr10	46261440	46261448	CCTTTAAAGG
chr10	46261440	46261448	CCTTTAAAGG
chr10	47123373	47123381	CCTTTAAAGG
chr10	47123373	47123381	CCTTTAAAGG
chr10	52858150	52858158	CCTTTAAAGG
chr10	57915073	57915081	CCTTTAAAGG
chr10	58098832	58098840	CCTTTAAAGG
chr10	58098832	58098840	CCTTTAAAGG
chr10	58292798	58292806	CCTTTAAAGG
chr10	65340089	65340097	CCTTTAAAGG
chr10	73254693	73254701	CCTTTAAAGG
chr10	84102518	84102526	CCTTTAAAGG
chr10	86804942	86804950	CCTTTAAAGG
chr10	88168248	88168256	CCTTTAAAGG
chr10	88168248	88168256	CCTTTAAAGG
chr10	95333180	95333188	CCTTTAAAGG
chr10	98033468	98033476	CCTTTAAAGG
chr10	99399234	99399242	CCTTTAAAGG
chr10	100856558	100856566	CCTTTAAAGG
chr10	102721003	102721011	CCTTTAAAGG
chr10	102721003	102721011	CCTTTAAAGG
chr10	104280413	104280421	CCTTTAAAGG
chr10	105452829	105452837	CCTTTAAAGG
chr10	105452829	105452837	CCTTTAAAGG
chr10	106330070	106330078	CCTTTAAAGG
chr10	119764128	119764136	CCTTTAAAGG
chr11	7086784	7086792	CCTTTAAAGG
chr11	10044362	10044370	CCTTTAAAGG
chr11	14378326	14378334	CCTTTAAAGG
chr11	18011272	18011280	CCTTTAAAGG
chr11	23232062	23232070	CCTTTAAAGG
chr11	28761923	28761931	CCTTTAAAGG
chr11	57120020	57120028	CCTTTAAAGG
chr11	64175833	64175841	CCTTTAAAGG
chr11	65185423	65185431	CCTTTAAAGG
chr11	67705601	67705609	CCTTTAAAGG
chr11	71698327	71698335	CCTTTAAAGG
chr11	75713818	75713826	CCTTTAAAGG
chr11	76971859	76971867	CCTTTAAAGG
chr11	81035518	81035526	CCTTTAAAGG
chr11	87494212	87494220	CCTTTAAAGG
chr11	87494212	87494220	CCTTTAAAGG
chr11	96871810	96871818	CCTTTAAAGG
chr11	98932506	98932514	CCTTTAAAGG
chr11	99492988	99492996	CCTTTAAAGG
chr11	108150028	108150036	CCTTTAAAGG
chr11	110351165	110351173	CCTTTAAAGG
chr11	119395430	119395438	CCTTTAAAGG
chr11	123048779	123048787	CCTTTAAAGG
chr11	125513855	125513863	CCTTTAAAGG
chr11	125869662	125869670	CCTTTAAAGG
chr11	128887908	128887916	CCTTTAAAGG
chr11	129785247	129785255	CCTTTAAAGG
chr11	132735930	132735938	CCTTTAAAGG
chr12	2673771	2673779	CCTTTAAAGG
chr12	8562363	8562371	CCTTTAAAGG
chr12	9325326	9325334	CCTTTAAAGG
chr12	26642341	26642349	CCTTTAAAGG
chr12	31755801	31755809	CCTTTAAAGG
chr12	38809403	38809411	CCTTTAAAGG
chr12	42443579	42443587	CCTTTAAAGG
chr12	43770832	43770840	CCTTTAAAGG
chr12	43979815	43979823	CCTTTAAAGG
chr12	50918444	50918452	CCTTTAAAGG
chr12	58033034	58033042	CCTTTAAAGG
chr12	58588128	58588136	CCTTTAAAGG
chr12	60205575	60205583	CCTTTAAAGG
chr12	63100910	63100918	CCTTTAAAGG
chr12	69330810	69330818	CCTTTAAAGG
chr12	69330810	69330818	CCTTTAAAGG
chr12	69330810	69330818	CCTTTAAAGG
chr12	72334989	72334997	CCTTTAAAGG
chr12	75283443	75283451	CCTTTAAAGG
chr12	80999807	80999815	CCTTTAAAGG
chr12	82009269	82009277	CCTTTAAAGG
chr12	88183172	88183180	CCTTTAAAGG
chr12	89271306	89271314	CCTTTAAAGG
chr12	91903240	91903248	CCTTTAAAGG
chr12	98483202	98483210	CCTTTAAAGG
chr12	100547454	100547462	CCTTTAAAGG
chr12	105774622	105774630	CCTTTAAAGG
chr12	105774622	105774630	CCTTTAAAGG
chr12	111129079	111129087	CCTTTAAAGG
chr12	113230614	113230622	CCTTTAAAGG
chr12	113231467	113231475	CCTTTAAAGG
chr12	114167190	114167198	CCTTTAAAGG
chr12	126657794	126657802	CCTTTAAAGG
chr12	130686105	130686113	CCTTTAAAGG
chr13	18425951	18425959	CCTTTAAAGG
chr13	18425951	18425959	CCTTTAAAGG
chr13	23692591	23692599	CCTTTAAAGG
chr13	24927306	24927314	CCTTTAAAGG
chr13	34574716	34574724	CCTTTAAAGG
chr13	34811452	34811460	CCTTTAAAGG
chr13	35711094	35711102	CCTTTAAAGG
chr13	35711094	35711102	CCTTTAAAGG
chr13	42735604	42735612	CCTTTAAAGG
chr13	50349036	50349044	CCTTTAAAGG
chr13	55642127	55642135	CCTTTAAAGG
chr13	55674194	55674202	CCTTTAAAGG
chr13	63422263	63422271	CCTTTAAAGG
chr13	66982092	66982100	CCTTTAAAGG
chr13	69472420	69472428	CCTTTAAAGG
chr13	69844545	69844553	CCTTTAAAGG
chr13	71029817	71029825	CCTTTAAAGG
chr13	71029817	71029825	CCTTTAAAGG
chr13	81079996	81080004	CCTTTAAAGG
chr13	82398579	82398587	CCTTTAAAGG
chr13	84892329	84892337	CCTTTAAAGG
chr13	89380406	89380414	CCTTTAAAGG
chr13	92980749	92980757	CCTTTAAAGG
chr13	98696837	98696845	CCTTTAAAGG
chr13	100087063	100087071	CCTTTAAAGG
chr13	100847483	100847491	CCTTTAAAGG
chr13	100847483	100847491	CCTTTAAAGG
chr13	101511575	101511583	CCTTTAAAGG
chr13	102671418	102671426	CCTTTAAAGG
chr13	107889632	107889640	CCTTTAAAGG
chr13	112591123	112591131	CCTTTAAAGG
chr14	18354295	18354303	CCTTTAAAGG
chr14	20807083	20807091	CCTTTAAAGG
chr14	28097677	28097685	CCTTTAAAGG
chr14	28274932	28274940	CCTTTAAAGG
chr14	38015914	38015922	CCTTTAAAGG
chr14	40340844	40340852	CCTTTAAAGG
chr14	40340844	40340852	CCTTTAAAGG
chr14	42805882	42805890	CCTTTAAAGG
chr14	44416888	44416896	CCTTTAAAGG
chr14	70870222	70870230	CCTTTAAAGG
chr14	70870222	70870230	CCTTTAAAGG
chr14	72504673	72504681	CCTTTAAAGG
chr14	72916054	72916062	CCTTTAAAGG
chr14	79891115	79891123	CCTTTAAAGG
chr14	81787625	81787633	CCTTTAAAGG
chr14	83148499	83148507	CCTTTAAAGG
chr14	87319057	87319065	CCTTTAAAGG
chr14	87728930	87728938	CCTTTAAAGG
chr14	104408246	104408254	CCTTTAAAGG
chr15	23505636	23505644	CCTTTAAAGG
chr15	24597267	24597275	CCTTTAAAGG
chr15	38175885	38175893	CCTTTAAAGG
chr15	46489212	46489220	CCTTTAAAGG
chr15	47569655	47569663	CCTTTAAAGG
chr15	52054632	52054640	CCTTTAAAGG
chr15	53819308	53819316	CCTTTAAAGG
chr15	54888109	54888117	CCTTTAAAGG
chr15	63119185	63119193	CCTTTAAAGG
chr15	73024711	73024719	CCTTTAAAGG
chr15	86590680	86590688	CCTTTAAAGG
chr15	90141437	90141445	CCTTTAAAGG
chr15	94522442	94522450	CCTTTAAAGG
chr15	97054121	97054129	CCTTTAAAGG
chr15	101567738	101567746	CCTTTAAAGG
chr16	5387540	5387548	CCTTTAAAGG
chr16	10380500	10380508	CCTTTAAAGG
chr16	12602711	12602719	CCTTTAAAGG
chr16	15544835	15544843	CCTTTAAAGG
chr16	19039489	19039497	CCTTTAAAGG
chr16	19272800	19272808	CCTTTAAAGG
chr16	31249808	31249816	CCTTTAAAGG
chr16	31765101	31765109	CCTTTAAAGG
chr16	32249334	32249342	CCTTTAAAGG
chr16	32680086	32680094	CCTTTAAAGG
chr16	33190301	33190309	CCTTTAAAGG
chr16	33300381	33300389	CCTTTAAAGG
chr16	33356914	33356922	CCTTTAAAGG
chr16	33455685	33455693	CCTTTAAAGG
chr16	35212258	35212266	CCTTTAAAGG
chr16	35271391	35271399	CCTTTAAAGG
chr16	35901093	35901101	CCTTTAAAGG
chr16	51791644	51791652	CCTTTAAAGG
chr16	60850404	60850412	CCTTTAAAGG
chr16	65256175	65256183	CCTTTAAAGG
chr16	71609416	71609424	CCTTTAAAGG
chr16	76794268	76794276	CCTTTAAAGG
chr16	83398283	83398291	CCTTTAAAGG
chr16	85944399	85944407	CCTTTAAAGG
chr17	6946912	6946920	CCTTTAAAGG
chr17	11118966	11118974	CCTTTAAAGG
chr17	11853039	11853047	CCTTTAAAGG
chr17	13331660	13331668	CCTTTAAAGG
chr17	21526490	21526498	CCTTTAAAGG
chr17	21526490	21526498	CCTTTAAAGG
chr17	30547101	30547109	CCTTTAAAGG
chr17	30547101	30547109	CCTTTAAAGG
chr17	35188344	35188352	CCTTTAAAGG
chr17	54566072	54566080	CCTTTAAAGG
chr17	81640757	81640765	CCTTTAAAGG
chr18	4080601	4080609	CCTTTAAAGG
chr18	4813758	4813766	CCTTTAAAGG
chr18	4875024	4875032	CCTTTAAAGG
chr18	5873710	5873718	CCTTTAAAGG
chr18	7732128	7732136	CCTTTAAAGG
chr18	15313586	15313594	CCTTTAAAGG
chr18	21430140	21430148	CCTTTAAAGG
chr18	25006890	25006898	CCTTTAAAGG
chr18	28351462	28351470	CCTTTAAAGG
chr18	35735663	35735671	CCTTTAAAGG
chr18	38707752	38707760	CCTTTAAAGG
chr18	42369886	42369894	CCTTTAAAGG
chr18	42389572	42389580	CCTTTAAAGG
chr18	46589788	46589796	CCTTTAAAGG
chr18	48019075	48019083	CCTTTAAAGG
chr18	48019075	48019083	CCTTTAAAGG
chr18	48432788	48432796	CCTTTAAAGG
chr18	48432788	48432796	CCTTTAAAGG
chr18	48596787	48596795	CCTTTAAAGG
chr18	50405659	50405667	CCTTTAAAGG
chr18	50405659	50405667	CCTTTAAAGG
chr18	52859607	52859615	CCTTTAAAGG
chr18	54605852	54605860	CCTTTAAAGG
chr18	55959452	55959460	CCTTTAAAGG
chr18	57047195	57047203	CCTTTAAAGG
chr18	71239053	71239061	CCTTTAAAGG
chr18	71305884	71305892	CCTTTAAAGG
chr18	74621759	74621767	CCTTTAAAGG
chr19	6711462	6711470	CCTTTAAAGG
chr19	11624447	11624455	CCTTTAAAGG
chr19	20066623	20066631	CCTTTAAAGG
chr19	23886123	23886131	CCTTTAAAGG
chr19	28394184	28394192	CCTTTAAAGG
chr20	4416699	4416707	CCTTTAAAGG
chr20	7804665	7804673	CCTTTAAAGG
chr20	18364950	18364958	CCTTTAAAGG
chr20	21842539	21842547	CCTTTAAAGG
chr20	24130862	24130870	CCTTTAAAGG
chr20	24130862	24130870	CCTTTAAAGG
chr20	29802567	29802575	CCTTTAAAGG
chr20	38399502	38399510	CCTTTAAAGG
chr20	43059678	43059686	CCTTTAAAGG
chr20	46529936	46529944	CCTTTAAAGG
chr20	50171241	50171249	CCTTTAAAGG
chr20	50499505	50499513	CCTTTAAAGG
chr20	53314985	53314993	CCTTTAAAGG
chr21	13054970	13054978	CCTTTAAAGG
chr21	16350472	16350480	CCTTTAAAGG
chr21	17682865	17682873	CCTTTAAAGG
chr21	40802573	40802581	CCTTTAAAGG
chr22	12192362	12192370	CCTTTAAAGG
chr22	15285104	15285112	CCTTTAAAGG
chr22	16148914	16148922	CCTTTAAAGG
chr22	17957009	17957017	CCTTTAAAGG
chr22	22655487	22655495	CCTTTAAAGG
chr22	27450982	27450990	CCTTTAAAGG
chr22	30353692	30353700	CCTTTAAAGG
chr22	43529601	43529609	CCTTTAAAGG
chr22	50629380	50629388	CCTTTAAAGG
chr22	50639984	50639992	CCTTTAAAGG
chrX	3643196	3643204	CCTTTAAAGG
chrX	6448317	6448325	CCTTTAAAGG
chrX	7029260	7029268	CCTTTAAAGG
chrX	7322305	7322313	CCTTTAAAGG
chrX	7400242	7400250	CCTTTAAAGG
chrX	8225339	8225347	CCTTTAAAGG
chrX	10322053	10322061	CCTTTAAAGG
chrX	12951872	12951880	CCTTTAAAGG
chrX	13383404	13383412	CCTTTAAAGG
chrX	15909797	15909805	CCTTTAAAGG
chrX	19121070	19121078	CCTTTAAAGG
chrX	20369389	20369397	CCTTTAAAGG
chrX	20369389	20369397	CCTTTAAAGG
chrX	23235094	23235102	CCTTTAAAGG
chrX	25895950	25895958	CCTTTAAAGG
chrX	27440901	27440909	CCTTTAAAGG
chrX	27440901	27440909	CCTTTAAAGG
chrX	29772885	29772893	CCTTTAAAGG
chrX	32020473	32020481	CCTTTAAAGG
chrX	48656920	48656928	CCTTTAAAGG
chrX	48656920	48656928	CCTTTAAAGG
chrX	51771440	51771448	CCTTTAAAGG
chrX	52353014	52353022	CCTTTAAAGG
chrX	52353014	52353022	CCTTTAAAGG
chrX	53014824	53014832	CCTTTAAAGG
chrX	81659678	81659686	CCTTTAAAGG
chrX	89515834	89515842	CCTTTAAAGG
chrX	89515834	89515842	CCTTTAAAGG
chrX	90054501	90054509	CCTTTAAAGG
chrX	94435629	94435637	CCTTTAAAGG
chrX	94456090	94456098	CCTTTAAAGG
chrX	95612182	95612190	CCTTTAAAGG
chrX	98294458	98294466	CCTTTAAAGG
chrX	114927377	114927385	CCTTTAAAGG
chrX	116667156	116667164	CCTTTAAAGG
chrX	116667156	116667164	CCTTTAAAGG
chrX	118201421	118201429	CCTTTAAAGG
chrX	140907194	140907202	CCTTTAAAGG
chrX	141935752	141935760	CCTTTAAAGG
chrX	145715740	145715748	CCTTTAAAGG
chrX	147269905	147269913	CCTTTAAAGG
chrX	149680486	149680494	CCTTTAAAGG
chrX	149722778	149722786	CCTTTAAAGG
chrX	153022461	153022469	CCTTTAAAGG
chrX	153426847	153426855	CCTTTAAAGG
chrY	3171719	3171727	CCTTTAAAGG
chrY	3171719	3171727	CCTTTAAAGG
chrY	13608928	13608936	CCTTTAAAGG
chrY	14873398	14873406	CCTTTAAAGG
chrY	16201677	16201685	CCTTTAAAGG
chrY	16383659	16383667	CCTTTAAAGG
chrY	19961184	19961192	CCTTTAAAGG
chrY	20554704	20554712	CCTTTAAAGG
chr1	56141398	56141406	CCTTGCAAGG
chr1	70638555	70638563	CCTTGCAAGG
chr1	73527371	73527379	CCTTGCAAGG
chr1	76463927	76463935	CCTTGCAAGG
chr1	80337909	80337917	CCTTGCAAGG
chr1	107674837	107674845	CCTTGCAAGG
chr1	117836134	117836142	CCTTGCAAGG
chr1	146048356	146048364	CCTTGCAAGG
chr1	161406747	161406755	CCTTGCAAGG
chr1	161406747	161406755	CCTTGCAAGG
chr1	195893025	195893033	CCTTGCAAGG
chr1	198829418	198829426	CCTTGCAAGG
chr1	204753533	204753541	CCTTGCAAGG
chr1	210439930	210439938	CCTTGCAAGG
chr1	225722137	225722145	CCTTGCAAGG
chr1	225722137	225722145	CCTTGCAAGG
chr1	226268512	226268520	CCTTGCAAGG
chr1	227568784	227568792	CCTTGCAAGG
chr1	238747824	238747832	CCTTGCAAGG
chr1	239273584	239273592	CCTTGCAAGG
chr1	239273584	239273592	CCTTGCAAGG
chr1	244004250	244004258	CCTTGCAAGG
chr2	45538175	45538183	CCTTGCAAGG
chr2	47593206	47593214	CCTTGCAAGG
chr2	58207068	58207076	CCTTGCAAGG
chr2	73705923	73705931	CCTTGCAAGG
chr2	78029831	78029839	CCTTGCAAGG
chr2	78106289	78106297	CCTTGCAAGG
chr2	81631541	81631549	CCTTGCAAGG
chr2	82108247	82108255	CCTTGCAAGG
chr2	88686379	88686387	CCTTGCAAGG
chr2	89211559	89211567	CCTTGCAAGG
chr2	89971202	89971210	CCTTGCAAGG
chr2	105878536	105878544	CCTTGCAAGG
chr2	107021749	107021757	CCTTGCAAGG
chr2	109654036	109654044	CCTTGCAAGG
chr2	117443641	117443649	CCTTGCAAGG
chr2	117709231	117709239	CCTTGCAAGG
chr2	120651731	120651739	CCTTGCAAGG
chr2	120994916	120994924	CCTTGCAAGG
chr2	120994916	120994924	CCTTGCAAGG
chr2	130734568	130734576	CCTTGCAAGG
chr2	132368412	132368420	CCTTGCAAGG
chr2	173298175	173298183	CCTTGCAAGG
chr2	181829261	181829269	CCTTGCAAGG
chr2	182619855	182619863	CCTTGCAAGG
chr2	191663204	191663212	CCTTGCAAGG
chr2	199248612	199248620	CCTTGCAAGG
chr2	204383942	204383950	CCTTGCAAGG
chr2	211263153	211263161	CCTTGCAAGG
chr2	218851399	218851407	CCTTGCAAGG
chr2	233357176	233357184	CCTTGCAAGG
chr2	238811007	238811015	CCTTGCAAGG
chr2	241214408	241214416	CCTTGCAAGG
chr3	16055189	16055197	CCTTGCAAGG
chr3	28810438	28810446	CCTTGCAAGG
chr3	36343491	36343499	CCTTGCAAGG
chr3	36343491	36343499	CCTTGCAAGG
chr3	61072361	61072369	CCTTGCAAGG
chr3	72928048	72928056	CCTTGCAAGG
chr3	91436111	91436119	CCTTGCAAGG
chr3	96701875	96701883	CCTTGCAAGG
chr3	97106858	97106866	CCTTGCAAGG
chr3	101036564	101036572	CCTTGCAAGG
chr3	103183884	103183892	CCTTGCAAGG
chr3	104118364	104118372	CCTTGCAAGG
chr3	105148462	105148470	CCTTGCAAGG
chr3	108818265	108818273	CCTTGCAAGG
chr3	110577208	110577216	CCTTGCAAGG
chr3	124284947	124284955	CCTTGCAAGG
chr3	127276929	127276937	CCTTGCAAGG
chr3	129696022	129696030	CCTTGCAAGG
chr3	129696022	129696030	CCTTGCAAGG
chr3	129696022	129696030	CCTTGCAAGG
chr3	149289811	149289819	CCTTGCAAGG
chr3	149289811	149289819	CCTTGCAAGG
chr3	150143287	150143295	CCTTGCAAGG
chr3	152922301	152922309	CCTTGCAAGG
chr3	164339440	164339448	CCTTGCAAGG
chr3	190365914	190365922	CCTTGCAAGG
chr3	190365914	190365922	CCTTGCAAGG
chr3	195731271	195731279	CCTTGCAAGG
chr4	15100074	15100082	CCTTGCAAGG
chr4	17739811	17739819	CCTTGCAAGG
chr4	27100146	27100154	CCTTGCAAGG
chr4	43905306	43905314	CCTTGCAAGG
chr4	46491257	46491265	CCTTGCAAGG
chr4	46730777	46730785	CCTTGCAAGG
chr4	72389181	72389189	CCTTGCAAGG
chr4	91456371	91456379	CCTTGCAAGG
chr4	106134658	106134666	CCTTGCAAGG
chr4	109251898	109251906	CCTTGCAAGG
chr4	112013282	112013290	CCTTGCAAGG
chr4	130783514	130783522	CCTTGCAAGG
chr4	131445013	131445021	CCTTGCAAGG
chr4	133385505	133385513	CCTTGCAAGG
chr4	136638393	136638401	CCTTGCAAGG
chr4	136638393	136638401	CCTTGCAAGG
chr4	136739372	136739380	CCTTGCAAGG
chr4	137415654	137415662	CCTTGCAAGG
chr4	137484419	137484427	CCTTGCAAGG
chr4	146261187	146261195	CCTTGCAAGG
chr4	154953517	154953525	CCTTGCAAGG
chr4	165194530	165194538	CCTTGCAAGG
chr4	166630306	166630314	CCTTGCAAGG
chr4	166630306	166630314	CCTTGCAAGG
chr4	175254439	175254447	CCTTGCAAGG
chr5	6438943	6438951	CCTTGCAAGG
chr5	16623396	16623404	CCTTGCAAGG
chr5	27307646	27307654	CCTTGCAAGG
chr5	35972988	35972996	CCTTGCAAGG
chr5	35972988	35972996	CCTTGCAAGG
chr5	40365235	40365243	CCTTGCAAGG
chr5	59495754	59495762	CCTTGCAAGG
chr5	73396354	73396362	CCTTGCAAGG
chr5	78764448	78764456	CCTTGCAAGG
chr5	84070490	84070498	CCTTGCAAGG
chr5	94983813	94983821	CCTTGCAAGG
chr5	95712061	95712069	CCTTGCAAGG
chr5	98414847	98414855	CCTTGCAAGG
chr5	104872031	104872039	CCTTGCAAGG
chr5	110539317	110539325	CCTTGCAAGG
chr5	121108938	121108946	CCTTGCAAGG
chr5	132531808	132531816	CCTTGCAAGG
chr5	134275424	134275432	CCTTGCAAGG
chr5	143962848	143962856	CCTTGCAAGG
chr5	150986264	150986272	CCTTGCAAGG
chr5	174117201	174117209	CCTTGCAAGG
chr5	175364159	175364167	CCTTGCAAGG
chr6	8683513	8683521	CCTTGCAAGG
chr6	15338531	15338539	CCTTGCAAGG
chr6	15854233	15854241	CCTTGCAAGG
chr6	27185798	27185806	CCTTGCAAGG
chr6	29526626	29526634	CCTTGCAAGG
chr6	31440860	31440868	CCTTGCAAGG
chr6	48347674	48347682	CCTTGCAAGG
chr6	48853842	48853850	CCTTGCAAGG
chr6	57586540	57586548	CCTTGCAAGG
chr6	60485096	60485104	CCTTGCAAGG
chr6	84800148	84800156	CCTTGCAAGG
chr6	84800148	84800156	CCTTGCAAGG
chr6	125352453	125352461	CCTTGCAAGG
chr6	141674754	141674762	CCTTGCAAGG
chr6	142527474	142527482	CCTTGCAAGG
chr6	143343631	143343639	CCTTGCAAGG
chr6	163644053	163644061	CCTTGCAAGG
chr6	163753917	163753925	CCTTGCAAGG
chr7	1453533	1453541	CCTTGCAAGG
chr7	18056799	18056807	CCTTGCAAGG
chr7	28010335	28010343	CCTTGCAAGG
chr7	35345872	35345880	CCTTGCAAGG
chr7	36040733	36040741	CCTTGCAAGG
chr7	42262924	42262932	CCTTGCAAGG
chr7	44092055	44092063	CCTTGCAAGG
chr7	44197942	44197950	CCTTGCAAGG
chr7	47598633	47598641	CCTTGCAAGG
chr7	48740544	48740552	CCTTGCAAGG
chr7	48949496	48949504	CCTTGCAAGG
chr7	48949496	48949504	CCTTGCAAGG
chr7	48949496	48949504	CCTTGCAAGG
chr7	53147746	53147754	CCTTGCAAGG
chr7	56121711	56121719	CCTTGCAAGG
chr7	56474259	56474267	CCTTGCAAGG
chr7	63078806	63078814	CCTTGCAAGG
chr7	79860589	79860597	CCTTGCAAGG
chr7	79860589	79860597	CCTTGCAAGG
chr7	81153712	81153720	CCTTGCAAGG
chr7	81153712	81153720	CCTTGCAAGG
chr7	102982460	102982468	CCTTGCAAGG
chr7	109146501	109146509	CCTTGCAAGG
chr7	110595908	110595916	CCTTGCAAGG
chr7	124395762	124395770	CCTTGCAAGG
chr7	134084615	134084623	CCTTGCAAGG
chr7	140263455	140263463	CCTTGCAAGG
chr7	145751751	145751759	CCTTGCAAGG
chr7	150317903	150317911	CCTTGCAAGG
chr8	5824811	5824819	CCTTGCAAGG
chr8	12821432	12821440	CCTTGCAAGG
chr8	20155908	20155916	CCTTGCAAGG
chr8	29589679	29589687	CCTTGCAAGG
chr8	30221089	30221097	CCTTGCAAGG
chr8	30942828	30942836	CCTTGCAAGG
chr8	42664190	42664198	CCTTGCAAGG
chr8	56229549	56229557	CCTTGCAAGG
chr8	63324759	63324767	CCTTGCAAGG
chr8	63324759	63324767	CCTTGCAAGG
chr8	77854695	77854703	CCTTGCAAGG
chr8	78944745	78944753	CCTTGCAAGG
chr8	80762832	80762840	CCTTGCAAGG
chr8	105809932	105809940	CCTTGCAAGG
chr8	133180220	133180228	CCTTGCAAGG
chr8	137776799	137776807	CCTTGCAAGG
chr8	138995431	138995439	CCTTGCAAGG
chr8	139582865	139582873	CCTTGCAAGG
chr8	139989468	139989476	CCTTGCAAGG
chr8	140748070	140748078	CCTTGCAAGG
chr8	144691487	144691495	CCTTGCAAGG
chr9	5577988	5577996	CCTTGCAAGG
chr9	11414982	11414990	CCTTGCAAGG
chr9	11472378	11472386	CCTTGCAAGG
chr9	13593430	13593438	CCTTGCAAGG
chr9	20671559	20671567	CCTTGCAAGG
chr9	24659923	24659931	CCTTGCAAGG
chr9	26612207	26612215	CCTTGCAAGG
chr9	71291320	71291328	CCTTGCAAGG
chr9	101802076	101802084	CCTTGCAAGG
chr9	118342570	118342578	CCTTGCAAGG
chr9	119252201	119252209	CCTTGCAAGG
chr9	120330039	120330047	CCTTGCAAGG
chr9	132057066	132057074	CCTTGCAAGG
chr10	1662464	1662472	CCTTGCAAGG
chr10	2019996	2020004	CCTTGCAAGG
chr10	14050783	14050791	CCTTGCAAGG
chr10	22219456	22219464	CCTTGCAAGG
chr10	26426335	26426343	CCTTGCAAGG
chr10	26426335	26426343	CCTTGCAAGG
chr10	30847763	30847771	CCTTGCAAGG
chr10	38598845	38598853	CCTTGCAAGG
chr10	47352103	47352111	CCTTGCAAGG
chr10	48199616	48199624	CCTTGCAAGG
chr10	75224762	75224770	CCTTGCAAGG
chr10	76691781	76691789	CCTTGCAAGG
chr10	79608221	79608229	CCTTGCAAGG
chr10	89479397	89479405	CCTTGCAAGG
chr10	101151356	101151364	CCTTGCAAGG
chr10	102571788	102571796	CCTTGCAAGG
chr10	115272720	115272728	CCTTGCAAGG
chr11	10894800	10894808	CCTTGCAAGG
chr11	13830199	13830207	CCTTGCAAGG
chr11	13924341	13924349	CCTTGCAAGG
chr11	36081121	36081129	CCTTGCAAGG
chr11	37855160	37855168	CCTTGCAAGG
chr11	63139639	63139647	CCTTGCAAGG
chr11	66172533	66172541	CCTTGCAAGG
chr11	74565813	74565821	CCTTGCAAGG
chr11	111057337	111057345	CCTTGCAAGG
chr11	116146124	116146132	CCTTGCAAGG
chr11	118282496	118282504	CCTTGCAAGG
chr12	18710228	18710236	CCTTGCAAGG
chr12	19697161	19697169	CCTTGCAAGG
chr12	22930176	22930184	CCTTGCAAGG
chr12	48898661	48898669	CCTTGCAAGG
chr12	57918434	57918442	CCTTGCAAGG
chr12	68278715	68278723	CCTTGCAAGG
chr12	72037285	72037293	CCTTGCAAGG
chr12	91759187	91759195	CCTTGCAAGG
chr12	92483333	92483341	CCTTGCAAGG
chr12	102417062	102417070	CCTTGCAAGG
chr12	104826388	104826396	CCTTGCAAGG
chr12	117430717	117430725	CCTTGCAAGG
chr12	126628545	126628553	CCTTGCAAGG
chr12	129645065	129645073	CCTTGCAAGG
chr12	129725810	129725818	CCTTGCAAGG
chr13	39166235	39166243	CCTTGCAAGG
chr13	47842169	47842177	CCTTGCAAGG
chr13	51455767	51455775	CCTTGCAAGG
chr13	57534390	57534398	CCTTGCAAGG
chr13	58857759	58857767	CCTTGCAAGG
chr13	82196940	82196948	CCTTGCAAGG
chr13	86186907	86186915	CCTTGCAAGG
chr13	100068633	100068641	CCTTGCAAGG
chr13	109373000	109373008	CCTTGCAAGG
chr14	46537616	46537624	CCTTGCAAGG
chr14	49343156	49343164	CCTTGCAAGG
chr14	69374816	69374824	CCTTGCAAGG
chr14	77314137	77314145	CCTTGCAAGG
chr14	88144761	88144769	CCTTGCAAGG
chr14	88145123	88145131	CCTTGCAAGG
chr14	88145123	88145131	CCTTGCAAGG
chr14	96141417	96141425	CCTTGCAAGG
chr15	19942030	19942038	CCTTGCAAGG
chr15	44770841	44770849	CCTTGCAAGG
chr15	48051107	48051115	CCTTGCAAGG
chr15	51600548	51600556	CCTTGCAAGG
chr15	53336478	53336486	CCTTGCAAGG
chr15	71474780	71474788	CCTTGCAAGG
chr15	72052722	72052730	CCTTGCAAGG
chr15	79834097	79834105	CCTTGCAAGG
chr15	81523152	81523160	CCTTGCAAGG
chr15	81523152	81523160	CCTTGCAAGG
chr15	89232622	89232630	CCTTGCAAGG
chr15	98162327	98162335	CCTTGCAAGG
chr16	9319009	9319017	CCTTGCAAGG
chr16	19262609	19262617	CCTTGCAAGG
chr16	50908856	50908864	CCTTGCAAGG
chr16	71352681	71352689	CCTTGCAAGG
chr16	76956430	76956438	CCTTGCAAGG
chr16	85369562	85369570	CCTTGCAAGG
chr17	13924232	13924240	CCTTGCAAGG
chr17	30999610	30999618	CCTTGCAAGG
chr17	31089376	31089384	CCTTGCAAGG
chr17	73891445	73891453	CCTTGCAAGG
chr18	1005182	1005190	CCTTGCAAGG
chr18	4992420	4992428	CCTTGCAAGG
chr18	5918730	5918738	CCTTGCAAGG
chr18	14490274	14490282	CCTTGCAAGG
chr18	43396591	43396599	CCTTGCAAGG
chr18	45980105	45980113	CCTTGCAAGG
chr18	55213808	55213816	CCTTGCAAGG
chr18	61997221	61997229	CCTTGCAAGG
chr18	68397506	68397514	CCTTGCAAGG
chr18	72371026	72371034	CCTTGCAAGG
chr18	72389539	72389547	CCTTGCAAGG
chr19	36346852	36346860	CCTTGCAAGG
chr20	2029606	2029614	CCTTGCAAGG
chr20	5818616	5818624	CCTTGCAAGG
chr20	17231978	17231986	CCTTGCAAGG
chr20	20256077	20256085	CCTTGCAAGG
chr20	34276617	34276625	CCTTGCAAGG
chr20	37950070	37950078	CCTTGCAAGG
chr20	41796274	41796282	CCTTGCAAGG
chr20	48251011	48251019	CCTTGCAAGG
chr20	48251011	48251019	CCTTGCAAGG
chr20	57385194	57385202	CCTTGCAAGG
chr20	60007440	60007448	CCTTGCAAGG
chr21	13663072	13663080	CCTTGCAAGG
chr21	20514432	20514440	CCTTGCAAGG
chr21	22093221	22093229	CCTTGCAAGG
chr21	27150356	27150364	CCTTGCAAGG
chr21	30343928	30343936	CCTTGCAAGG
chr21	31715403	31715411	CCTTGCAAGG
chr21	35629756	35629764	CCTTGCAAGG
chr21	38963619	38963627	CCTTGCAAGG
chr21	44488771	44488779	CCTTGCAAGG
chr22	47860271	47860279	CCTTGCAAGG
chr22	49725600	49725608	CCTTGCAAGG
chrX	3496512	3496520	CCTTGCAAGG
chrX	6823301	6823309	CCTTGCAAGG
chrX	8495008	8495016	CCTTGCAAGG
chrX	18882337	18882345	CCTTGCAAGG
chrX	29857602	29857610	CCTTGCAAGG
chrX	34532396	34532404	CCTTGCAAGG
chrX	34868363	34868371	CCTTGCAAGG
chrX	43085432	43085440	CCTTGCAAGG
chrX	51323025	51323033	CCTTGCAAGG
chrX	74368836	74368844	CCTTGCAAGG
chrX	84884332	84884340	CCTTGCAAGG
chrX	89767718	89767726	CCTTGCAAGG
chrX	93177130	93177138	CCTTGCAAGG
chrX	95535522	95535530	CCTTGCAAGG
chrX	95551758	95551766	CCTTGCAAGG
chrX	100428493	100428501	CCTTGCAAGG
chrX	110045821	110045829	CCTTGCAAGG
chrX	127174335	127174343	CCTTGCAAGG
chrX	128166751	128166759	CCTTGCAAGG
chrX	137469582	137469590	CCTTGCAAGG
chrX	140945689	140945697	CCTTGCAAGG
chrX	145548415	145548423	CCTTGCAAGG
chrY	3415577	3415585	CCTTGCAAGG
chrY	7484864	7484872	CCTTGCAAGG
chrY	12924463	12924471	CCTTGCAAGG
chrY	13943085	13943093	CCTTGCAAGG
chrY	16170493	16170501	CCTTGCAAGG
chrY	16414847	16414855	CCTTGCAAGG
chrY	19233179	19233187	CCTTGCAAGG
chr1	1464394	1464402	CCTTATAAGG
chr1	1875971	1875979	CCTTATAAGG
chr1	4746275	4746283	CCTTATAAGG
chr1	10199170	10199178	CCTTATAAGG
chr1	13974554	13974562	CCTTATAAGG
chr1	13974554	13974562	CCTTATAAGG
chr1	16463927	16463935	CCTTATAAGG
chr1	17367160	17367168	CCTTATAAGG
chr1	17367160	17367168	CCTTATAAGG
chr1	18341273	18341281	CCTTATAAGG
chr1	23008332	23008340	CCTTATAAGG
chr1	30004132	30004140	CCTTATAAGG
chr1	33420015	33420023	CCTTATAAGG
chr1	35771684	35771692	CCTTATAAGG
chr1	36662514	36662522	CCTTATAAGG
chr1	37892862	37892870	CCTTATAAGG
chr1	38228148	38228156	CCTTATAAGG
chr1	38339668	38339676	CCTTATAAGG
chr1	38518166	38518174	CCTTATAAGG
chr1	53717546	53717554	CCTTATAAGG
chr1	54689199	54689207	CCTTATAAGG
chr1	56183987	56183995	CCTTATAAGG
chr1	56922609	56922617	CCTTATAAGG
chr1	65293354	65293362	CCTTATAAGG
chr1	65293354	65293362	CCTTATAAGG
chr1	67228913	67228921	CCTTATAAGG
chr1	71502280	71502288	CCTTATAAGG
chr1	74492960	74492968	CCTTATAAGG
chr1	74821925	74821933	CCTTATAAGG
chr1	79856835	79856843	CCTTATAAGG
chr1	82301079	82301087	CCTTATAAGG
chr1	89079192	89079200	CCTTATAAGG
chr1	90228320	90228328	CCTTATAAGG
chr1	93395987	93395995	CCTTATAAGG
chr1	95207663	95207671	CCTTATAAGG
chr1	95666877	95666885	CCTTATAAGG
chr1	96472185	96472193	CCTTATAAGG
chr1	96472185	96472193	CCTTATAAGG
chr1	101545736	101545744	CCTTATAAGG
chr1	106698952	106698960	CCTTATAAGG
chr1	115122783	115122791	CCTTATAAGG
chr1	116432292	116432300	CCTTATAAGG
chr1	146623551	146623559	CCTTATAAGG
chr1	146623551	146623559	CCTTATAAGG
chr1	162095290	162095298	CCTTATAAGG
chr1	162855934	162855942	CCTTATAAGG
chr1	163116025	163116033	CCTTATAAGG
chr1	173433928	173433936	CCTTATAAGG
chr1	173671084	173671092	CCTTATAAGG
chr1	173671084	173671092	CCTTATAAGG
chr1	180523176	180523184	CCTTATAAGG
chr1	194710245	194710253	CCTTATAAGG
chr1	202761646	202761654	CCTTATAAGG
chr1	205332081	205332089	CCTTATAAGG
chr1	205818185	205818193	CCTTATAAGG
chr1	209543133	209543141	CCTTATAAGG
chr1	212478171	212478179	CCTTATAAGG
chr1	214850174	214850182	CCTTATAAGG
chr1	217905358	217905366	CCTTATAAGG
chr1	219722469	219722477	CCTTATAAGG
chr1	230585263	230585271	CCTTATAAGG
chr1	232498741	232498749	CCTTATAAGG
chr1	232747954	232747962	CCTTATAAGG
chr1	237010092	237010100	CCTTATAAGG
chr1	238196816	238196824	CCTTATAAGG
chr1	242894136	242894144	CCTTATAAGG
chr2	4014399	4014407	CCTTATAAGG
chr2	4400945	4400953	CCTTATAAGG
chr2	5470153	5470161	CCTTATAAGG
chr2	5470200	5470208	CCTTATAAGG
chr2	6839178	6839186	CCTTATAAGG
chr2	7711588	7711596	CCTTATAAGG
chr2	9764331	9764339	CCTTATAAGG
chr2	11710135	11710143	CCTTATAAGG
chr2	14622140	14622148	CCTTATAAGG
chr2	17458488	17458496	CCTTATAAGG
chr2	18615960	18615968	CCTTATAAGG
chr2	19815211	19815219	CCTTATAAGG
chr2	20867724	20867732	CCTTATAAGG
chr2	21055600	21055608	CCTTATAAGG
chr2	26986228	26986236	CCTTATAAGG
chr2	29205813	29205821	CCTTATAAGG
chr2	29635281	29635289	CCTTATAAGG
chr2	30627318	30627326	CCTTATAAGG
chr2	30666692	30666700	CCTTATAAGG
chr2	32532489	32532497	CCTTATAAGG
chr2	33453540	33453548	CCTTATAAGG
chr2	33830389	33830397	CCTTATAAGG
chr2	35537281	35537289	CCTTATAAGG
chr2	39713527	39713535	CCTTATAAGG
chr2	47579245	47579253	CCTTATAAGG
chr2	48477978	48477986	CCTTATAAGG
chr2	68698245	68698253	CCTTATAAGG
chr2	69889587	69889595	CCTTATAAGG
chr2	70750473	70750481	CCTTATAAGG
chr2	74905037	74905045	CCTTATAAGG
chr2	76286677	76286685	CCTTATAAGG
chr2	76742927	76742935	CCTTATAAGG
chr2	82755678	82755686	CCTTATAAGG
chr2	85801527	85801535	CCTTATAAGG
chr2	86325445	86325453	CCTTATAAGG
chr2	89294461	89294469	CCTTATAAGG
chr2	89888010	89888018	CCTTATAAGG
chr2	95395390	95395398	CCTTATAAGG
chr2	98073933	98073941	CCTTATAAGG
chr2	99536396	99536404	CCTTATAAGG
chr2	99536396	99536404	CCTTATAAGG
chr2	101516536	101516544	CCTTATAAGG
chr2	101516536	101516544	CCTTATAAGG
chr2	102897430	102897438	CCTTATAAGG
chr2	114903780	114903788	CCTTATAAGG
chr2	116967456	116967464	CCTTATAAGG
chr2	117318377	117318385	CCTTATAAGG
chr2	124722008	124722016	CCTTATAAGG
chr2	128641543	128641551	CCTTATAAGG
chr2	129315471	129315479	CCTTATAAGG
chr2	134673619	134673627	CCTTATAAGG
chr2	138285850	138285858	CCTTATAAGG
chr2	142296973	142296981	CCTTATAAGG
chr2	147137566	147137574	CCTTATAAGG
chr2	147518319	147518327	CCTTATAAGG
chr2	147657591	147657599	CCTTATAAGG
chr2	147657591	147657599	CCTTATAAGG
chr2	165483790	165483798	CCTTATAAGG
chr2	171464485	171464493	CCTTATAAGG
chr2	172702980	172702988	CCTTATAAGG
chr2	174433653	174433661	CCTTATAAGG
chr2	174750378	174750386	CCTTATAAGG
chr2	179140368	179140376	CCTTATAAGG
chr2	180250314	180250322	CCTTATAAGG
chr2	189123493	189123501	CCTTATAAGG
chr2	191585619	191585627	CCTTATAAGG
chr2	194154996	194155004	CCTTATAAGG
chr2	194162958	194162966	CCTTATAAGG
chr2	195269996	195270004	CCTTATAAGG
chr2	195865838	195865846	CCTTATAAGG
chr2	195943357	195943365	CCTTATAAGG
chr2	196831817	196831825	CCTTATAAGG
chr2	198661109	198661117	CCTTATAAGG
chr2	208944736	208944744	CCTTATAAGG
chr2	211370918	211370926	CCTTATAAGG
chr2	212351176	212351184	CCTTATAAGG
chr2	224056828	224056836	CCTTATAAGG
chr2	229262894	229262902	CCTTATAAGG
chr2	229982449	229982457	CCTTATAAGG
chr2	237961704	237961712	CCTTATAAGG
chr2	238570478	238570486	CCTTATAAGG
chr3	2479540	2479548	CCTTATAAGG
chr3	3423089	3423097	CCTTATAAGG
chr3	3438094	3438102	CCTTATAAGG
chr3	5141064	5141072	CCTTATAAGG
chr3	5637329	5637337	CCTTATAAGG
chr3	8342098	8342106	CCTTATAAGG
chr3	11733469	11733477	CCTTATAAGG
chr3	14650555	14650563	CCTTATAAGG
chr3	16334873	16334881	CCTTATAAGG
chr3	21640552	21640560	CCTTATAAGG
chr3	28431499	28431507	CCTTATAAGG
chr3	30912616	30912624	CCTTATAAGG
chr3	32386002	32386010	CCTTATAAGG
chr3	33709451	33709459	CCTTATAAGG
chr3	34358132	34358140	CCTTATAAGG
chr3	46111297	46111305	CCTTATAAGG
chr3	47264885	47264893	CCTTATAAGG
chr3	57952433	57952441	CCTTATAAGG
chr3	59780664	59780672	CCTTATAAGG
chr3	59809264	59809272	CCTTATAAGG
chr3	60280489	60280497	CCTTATAAGG
chr3	60784828	60784836	CCTTATAAGG
chr3	65073052	65073060	CCTTATAAGG
chr3	65073052	65073060	CCTTATAAGG
chr3	70818126	70818134	CCTTATAAGG
chr3	72701294	72701302	CCTTATAAGG
chr3	74225180	74225188	CCTTATAAGG
chr3	81440447	81440455	CCTTATAAGG
chr3	97211602	97211610	CCTTATAAGG
chr3	97211602	97211610	CCTTATAAGG
chr3	102632394	102632402	CCTTATAAGG
chr3	107007203	107007211	CCTTATAAGG
chr3	107007203	107007211	CCTTATAAGG
chr3	108023866	108023874	CCTTATAAGG
chr3	110935116	110935124	CCTTATAAGG
chr3	111190642	111190650	CCTTATAAGG
chr3	114730568	114730576	CCTTATAAGG
chr3	120853553	120853561	CCTTATAAGG
chr3	121261193	121261201	CCTTATAAGG
chr3	122315620	122315628	CCTTATAAGG
chr3	141012767	141012775	CCTTATAAGG
chr3	143260114	143260122	CCTTATAAGG
chr3	143260114	143260122	CCTTATAAGG
chr3	146333679	146333687	CCTTATAAGG
chr3	146339574	146339582	CCTTATAAGG
chr3	146472983	146472991	CCTTATAAGG
chr3	156710621	156710629	CCTTATAAGG
chr3	156803021	156803029	CCTTATAAGG
chr3	158745737	158745745	CCTTATAAGG
chr3	161478429	161478437	CCTTATAAGG
chr3	165240461	165240469	CCTTATAAGG
chr3	168320483	168320491	CCTTATAAGG
chr3	169836542	169836550	CCTTATAAGG
chr3	170958374	170958382	CCTTATAAGG
chr3	172277447	172277455	CCTTATAAGG
chr3	176061029	176061037	CCTTATAAGG
chr3	176798654	176798662	CCTTATAAGG
chr3	186712385	186712393	CCTTATAAGG
chr3	190346874	190346882	CCTTATAAGG
chr3	190864140	190864148	CCTTATAAGG
chr3	191254832	191254840	CCTTATAAGG
chr3	191738427	191738435	CCTTATAAGG
chr3	191743954	191743962	CCTTATAAGG
chr3	193837048	193837056	CCTTATAAGG
chr4	3555148	3555156	CCTTATAAGG
chr4	4682568	4682576	CCTTATAAGG
chr4	5238390	5238398	CCTTATAAGG
chr4	5573216	5573224	CCTTATAAGG
chr4	7637052	7637060	CCTTATAAGG
chr4	8243354	8243362	CCTTATAAGG
chr4	16731462	16731470	CCTTATAAGG
chr4	17116509	17116517	CCTTATAAGG
chr4	17186082	17186090	CCTTATAAGG
chr4	21230088	21230096	CCTTATAAGG
chr4	24137190	24137198	CCTTATAAGG
chr4	27367583	27367591	CCTTATAAGG
chr4	27762389	27762397	CCTTATAAGG
chr4	32041195	32041203	CCTTATAAGG
chr4	32933171	32933179	CCTTATAAGG
chr4	32933171	32933179	CCTTATAAGG
chr4	35525345	35525353	CCTTATAAGG
chr4	35525345	35525353	CCTTATAAGG
chr4	38430789	38430797	CCTTATAAGG
chr4	38999908	38999916	CCTTATAAGG
chr4	40885357	40885365	CCTTATAAGG
chr4	47389228	47389236	CCTTATAAGG
chr4	56123402	56123410	CCTTATAAGG
chr4	58133465	58133473	CCTTATAAGG
chr4	58999452	58999460	CCTTATAAGG
chr4	63938136	63938144	CCTTATAAGG
chr4	66953890	66953898	CCTTATAAGG
chr4	71866358	71866366	CCTTATAAGG
chr4	76419780	76419788	CCTTATAAGG
chr4	76907579	76907587	CCTTATAAGG
chr4	85079352	85079360	CCTTATAAGG
chr4	88550032	88550040	CCTTATAAGG
chr4	89386075	89386083	CCTTATAAGG
chr4	90958693	90958701	CCTTATAAGG
chr4	91676926	91676934	CCTTATAAGG
chr4	97391144	97391152	CCTTATAAGG
chr4	101037389	101037397	CCTTATAAGG
chr4	109677787	109677795	CCTTATAAGG
chr4	117044536	117044544	CCTTATAAGG
chr4	118008772	118008780	CCTTATAAGG
chr4	118008772	118008780	CCTTATAAGG
chr4	119612641	119612649	CCTTATAAGG
chr4	131163663	131163671	CCTTATAAGG
chr4	134114461	134114469	CCTTATAAGG
chr4	140837505	140837513	CCTTATAAGG
chr4	142856887	142856895	CCTTATAAGG
chr4	155484350	155484358	CCTTATAAGG
chr4	161086977	161086985	CCTTATAAGG
chr4	161949222	161949230	CCTTATAAGG
chr4	162858524	162858532	CCTTATAAGG
chr4	164793666	164793674	CCTTATAAGG
chr4	169324423	169324431	CCTTATAAGG
chr4	176660328	176660336	CCTTATAAGG
chr4	176660328	176660336	CCTTATAAGG
chr4	178806406	178806414	CCTTATAAGG
chr4	178806406	178806414	CCTTATAAGG
chr4	184667789	184667797	CCTTATAAGG
chr4	185232338	185232346	CCTTATAAGG
chr4	186458216	186458224	CCTTATAAGG
chr4	187208719	187208727	CCTTATAAGG
chr5	6212443	6212451	CCTTATAAGG
chr5	9215470	9215478	CCTTATAAGG
chr5	10131006	10131014	CCTTATAAGG
chr5	19923297	19923305	CCTTATAAGG
chr5	25019824	25019832	CCTTATAAGG
chr5	27126133	27126141	CCTTATAAGG
chr5	29471275	29471283	CCTTATAAGG
chr5	30877525	30877533	CCTTATAAGG
chr5	30877525	30877533	CCTTATAAGG
chr5	31591857	31591865	CCTTATAAGG
chr5	33686672	33686680	CCTTATAAGG
chr5	33922859	33922867	CCTTATAAGG
chr5	36009723	36009731	CCTTATAAGG
chr5	40694627	40694635	CCTTATAAGG
chr5	41657119	41657127	CCTTATAAGG
chr5	42839328	42839336	CCTTATAAGG
chr5	44448157	44448165	CCTTATAAGG
chr5	59066779	59066787	CCTTATAAGG
chr5	59618836	59618844	CCTTATAAGG
chr5	63433429	63433437	CCTTATAAGG
chr5	66226431	66226439	CCTTATAAGG
chr5	71624149	71624157	CCTTATAAGG
chr5	73772677	73772685	CCTTATAAGG
chr5	84292999	84293007	CCTTATAAGG
chr5	85439036	85439044	CCTTATAAGG
chr5	85647941	85647949	CCTTATAAGG
chr5	87877671	87877679	CCTTATAAGG
chr5	90114490	90114498	CCTTATAAGG
chr5	92352462	92352470	CCTTATAAGG
chr5	97869342	97869350	CCTTATAAGG
chr5	100646756	100646764	CCTTATAAGG
chr5	101788326	101788334	CCTTATAAGG
chr5	101788326	101788334	CCTTATAAGG
chr5	101926799	101926807	CCTTATAAGG
chr5	101926813	101926821	CCTTATAAGG
chr5	108187372	108187380	CCTTATAAGG
chr5	108715807	108715815	CCTTATAAGG
chr5	118022651	118022659	CCTTATAAGG
chr5	120279862	120279870	CCTTATAAGG
chr5	122017454	122017462	CCTTATAAGG
chr5	125928930	125928938	CCTTATAAGG
chr5	130541928	130541936	CCTTATAAGG
chr5	141045764	141045772	CCTTATAAGG
chr5	141045764	141045772	CCTTATAAGG
chr5	142170448	142170456	CCTTATAAGG
chr5	152233030	152233038	CCTTATAAGG
chr5	155204304	155204312	CCTTATAAGG
chr5	155204304	155204312	CCTTATAAGG
chr5	159598157	159598165	CCTTATAAGG
chr5	159767738	159767746	CCTTATAAGG
chr5	162898160	162898168	CCTTATAAGG
chr5	165214801	165214809	CCTTATAAGG
chr5	173530159	173530167	CCTTATAAGG
chr5	175093824	175093832	CCTTATAAGG
chr6	5902011	5902019	CCTTATAAGG
chr6	6017622	6017630	CCTTATAAGG
chr6	10475532	10475540	CCTTATAAGG
chr6	13450895	13450903	CCTTATAAGG
chr6	14269087	14269095	CCTTATAAGG
chr6	14580831	14580839	CCTTATAAGG
chr6	15826222	15826230	CCTTATAAGG
chr6	19037435	19037443	CCTTATAAGG
chr6	19068746	19068754	CCTTATAAGG
chr6	20203894	20203902	CCTTATAAGG
chr6	22206734	22206742	CCTTATAAGG
chr6	25124316	25124324	CCTTATAAGG
chr6	32808760	32808768	CCTTATAAGG
chr6	33021689	33021697	CCTTATAAGG
chr6	34679790	34679798	CCTTATAAGG
chr6	43996790	43996798	CCTTATAAGG
chr6	48242499	48242507	CCTTATAAGG
chr6	51106610	51106618	CCTTATAAGG
chr6	52729378	52729386	CCTTATAAGG
chr6	57263523	57263531	CCTTATAAGG
chr6	60699436	60699444	CCTTATAAGG
chr6	61918476	61918484	CCTTATAAGG
chr6	63189827	63189835	CCTTATAAGG
chr6	70895988	70895996	CCTTATAAGG
chr6	72745978	72745986	CCTTATAAGG
chr6	73939643	73939651	CCTTATAAGG
chr6	74881060	74881068	CCTTATAAGG
chr6	74881060	74881068	CCTTATAAGG
chr6	76307831	76307839	CCTTATAAGG
chr6	77542440	77542448	CCTTATAAGG
chr6	78268808	78268816	CCTTATAAGG
chr6	79529539	79529547	CCTTATAAGG
chr6	79529552	79529560	CCTTATAAGG
chr6	87997887	87997895	CCTTATAAGG
chr6	91216000	91216008	CCTTATAAGG
chr6	96508222	96508230	CCTTATAAGG
chr6	106577746	106577754	CCTTATAAGG
chr6	108982375	108982383	CCTTATAAGG
chr6	117665486	117665494	CCTTATAAGG
chr6	118542998	118543006	CCTTATAAGG
chr6	120508753	120508761	CCTTATAAGG
chr6	126160169	126160177	CCTTATAAGG
chr6	128555286	128555294	CCTTATAAGG
chr6	130257174	130257182	CCTTATAAGG
chr6	134119885	134119893	CCTTATAAGG
chr6	146089398	146089406	CCTTATAAGG
chr6	148636513	148636521	CCTTATAAGG
chr6	148871081	148871089	CCTTATAAGG
chr6	159106741	159106749	CCTTATAAGG
chr6	162268320	162268328	CCTTATAAGG
chr6	163704296	163704304	CCTTATAAGG
chr6	163704296	163704304	CCTTATAAGG
chr6	166644862	166644870	CCTTATAAGG
chr6	170036910	170036918	CCTTATAAGG
chr7	5492687	5492695	CCTTATAAGG
chr7	7803771	7803779	CCTTATAAGG
chr7	14266817	14266825	CCTTATAAGG
chr7	15230683	15230691	CCTTATAAGG
chr7	20762096	20762104	CCTTATAAGG
chr7	21556130	21556138	CCTTATAAGG
chr7	26565986	26565994	CCTTATAAGG
chr7	29434594	29434602	CCTTATAAGG
chr7	37622972	37622980	CCTTATAAGG
chr7	38561784	38561792	CCTTATAAGG
chr7	42594021	42594029	CCTTATAAGG
chr7	53227628	53227636	CCTTATAAGG
chr7	67367695	67367703	CCTTATAAGG
chr7	70831242	70831250	CCTTATAAGG
chr7	71279216	71279224	CCTTATAAGG
chr7	71279216	71279224	CCTTATAAGG
chr7	79858621	79858629	CCTTATAAGG
chr7	80413758	80413766	CCTTATAAGG
chr7	82532337	82532345	CCTTATAAGG
chr7	82532337	82532345	CCTTATAAGG
chr7	85516895	85516903	CCTTATAAGG
chr7	87281597	87281605	CCTTATAAGG
chr7	92975732	92975740	CCTTATAAGG
chr7	96505403	96505411	CCTTATAAGG
chr7	99808995	99809003	CCTTATAAGG
chr7	104421912	104421920	CCTTATAAGG
chr7	109068132	109068140	CCTTATAAGG
chr7	113519738	113519746	CCTTATAAGG
chr7	123970355	123970363	CCTTATAAGG
chr7	124018032	124018040	CCTTATAAGG
chr7	126006974	126006982	CCTTATAAGG
chr7	126006974	126006982	CCTTATAAGG
chr7	136970036	136970044	CCTTATAAGG
chr7	137885974	137885982	CCTTATAAGG
chr7	140246761	140246769	CCTTATAAGG
chr7	144563905	144563913	CCTTATAAGG
chr7	144763153	144763161	CCTTATAAGG
chr7	149381049	149381057	CCTTATAAGG
chr7	151442205	151442213	CCTTATAAGG
chr7	152756368	152756376	CCTTATAAGG
chr7	152756368	152756376	CCTTATAAGG
chr7	155158922	155158930	CCTTATAAGG
chr8	3675614	3675622	CCTTATAAGG
chr8	6395849	6395857	CCTTATAAGG
chr8	11177611	11177619	CCTTATAAGG
chr8	19193499	19193507	CCTTATAAGG
chr8	21382072	21382080	CCTTATAAGG
chr8	21448300	21448308	CCTTATAAGG
chr8	27499896	27499904	CCTTATAAGG
chr8	33758216	33758224	CCTTATAAGG
chr8	35785940	35785948	CCTTATAAGG
chr8	47285686	47285694	CCTTATAAGG
chr8	48111759	48111767	CCTTATAAGG
chr8	51646193	51646201	CCTTATAAGG
chr8	53487906	53487914	CCTTATAAGG
chr8	53913587	53913595	CCTTATAAGG
chr8	55843585	55843593	CCTTATAAGG
chr8	56923127	56923135	CCTTATAAGG
chr8	57490700	57490708	CCTTATAAGG
chr8	61988878	61988886	CCTTATAAGG
chr8	62746387	62746395	CCTTATAAGG
chr8	63108769	63108777	CCTTATAAGG
chr8	66008665	66008673	CCTTATAAGG
chr8	66108414	66108422	CCTTATAAGG
chr8	66416285	66416293	CCTTATAAGG
chr8	80326098	80326106	CCTTATAAGG
chr8	82207197	82207205	CCTTATAAGG
chr8	83953129	83953137	CCTTATAAGG
chr8	92609746	92609754	CCTTATAAGG
chr8	94088966	94088974	CCTTATAAGG
chr8	94088966	94088974	CCTTATAAGG
chr8	100562698	100562706	CCTTATAAGG
chr8	100653457	100653465	CCTTATAAGG
chr8	106062158	106062166	CCTTATAAGG
chr8	106062158	106062166	CCTTATAAGG
chr8	106439251	106439259	CCTTATAAGG
chr8	113735166	113735174	CCTTATAAGG
chr8	115386632	115386640	CCTTATAAGG
chr8	115386632	115386640	CCTTATAAGG
chr8	120974637	120974645	CCTTATAAGG
chr8	123281597	123281605	CCTTATAAGG
chr8	133118817	133118825	CCTTATAAGG
chr8	135076525	135076533	CCTTATAAGG
chr8	139675462	139675470	CCTTATAAGG
chr8	139689040	139689048	CCTTATAAGG
chr9	2755523	2755531	CCTTATAAGG
chr9	9885599	9885607	CCTTATAAGG
chr9	9885599	9885607	CCTTATAAGG
chr9	13949737	13949745	CCTTATAAGG
chr9	19664691	19664699	CCTTATAAGG
chr9	19808712	19808720	CCTTATAAGG
chr9	27081067	27081075	CCTTATAAGG
chr9	34158760	34158768	CCTTATAAGG
chr9	34158760	34158768	CCTTATAAGG
chr9	38363931	38363939	CCTTATAAGG
chr9	39527684	39527692	CCTTATAAGG
chr9	39713473	39713481	CCTTATAAGG
chr9	41770536	41770544	CCTTATAAGG
chr9	42283026	42283034	CCTTATAAGG
chr9	60757700	60757708	CCTTATAAGG
chr9	61544768	61544776	CCTTATAAGG
chr9	61982231	61982239	CCTTATAAGG
chr9	62628937	62628945	CCTTATAAGG
chr9	65475649	65475657	CCTTATAAGG
chr9	66663455	66663463	CCTTATAAGG
chr9	66837610	66837618	CCTTATAAGG
chr9	67605910	67605918	CCTTATAAGG
chr9	68494410	68494418	CCTTATAAGG
chr9	75270308	75270316	CCTTATAAGG
chr9	75297102	75297110	CCTTATAAGG
chr9	79236298	79236306	CCTTATAAGG
chr9	79686536	79686544	CCTTATAAGG
chr9	81214054	81214062	CCTTATAAGG
chr9	90789605	90789613	CCTTATAAGG
chr9	100263553	100263561	CCTTATAAGG
chr9	101611363	101611371	CCTTATAAGG
chr9	107267163	107267171	CCTTATAAGG
chr9	110495395	110495403	CCTTATAAGG
chr9	111210752	111210760	CCTTATAAGG
chr9	116065470	116065478	CCTTATAAGG
chr9	118179200	118179208	CCTTATAAGG
chr9	119821799	119821807	CCTTATAAGG
chr10	17005932	17005940	CCTTATAAGG
chr10	19760520	19760528	CCTTATAAGG
chr10	21428006	21428014	CCTTATAAGG
chr10	36563550	36563558	CCTTATAAGG
chr10	37782642	37782650	CCTTATAAGG
chr10	48334962	48334970	CCTTATAAGG
chr10	51380813	51380821	CCTTATAAGG
chr10	52593789	52593797	CCTTATAAGG
chr10	57176080	57176088	CCTTATAAGG
chr10	57655456	57655464	CCTTATAAGG
chr10	58173216	58173224	CCTTATAAGG
chr10	64184401	64184409	CCTTATAAGG
chr10	66363377	66363385	CCTTATAAGG
chr10	69483397	69483405	CCTTATAAGG
chr10	78596999	78597007	CCTTATAAGG
chr10	78770373	78770381	CCTTATAAGG
chr10	88400168	88400176	CCTTATAAGG
chr10	91548989	91548997	CCTTATAAGG
chr10	93019711	93019719	CCTTATAAGG
chr10	96936781	96936789	CCTTATAAGG
chr10	96937125	96937133	CCTTATAAGG
chr10	100641513	100641521	CCTTATAAGG
chr10	101197936	101197944	CCTTATAAGG
chr10	102193367	102193375	CCTTATAAGG
chr10	102204633	102204641	CCTTATAAGG
chr10	103212177	103212185	CCTTATAAGG
chr10	103212177	103212185	CCTTATAAGG
chr10	108071512	108071520	CCTTATAAGG
chr10	111199498	111199506	CCTTATAAGG
chr10	113973903	113973911	CCTTATAAGG
chr10	117699667	117699675	CCTTATAAGG
chr10	117699685	117699693	CCTTATAAGG
chr10	120227598	120227606	CCTTATAAGG
chr10	123052459	123052467	CCTTATAAGG
chr10	124007057	124007065	CCTTATAAGG
chr10	124893051	124893059	CCTTATAAGG
chr10	126131580	126131588	CCTTATAAGG
chr10	127349884	127349892	CCTTATAAGG
chr10	128725907	128725915	CCTTATAAGG
chr11	1326417	1326425	CCTTATAAGG
chr11	8588110	8588118	CCTTATAAGG
chr11	11241527	11241535	CCTTATAAGG
chr11	11241559	11241567	CCTTATAAGG
chr11	17703892	17703900	CCTTATAAGG
chr11	17703892	17703900	CCTTATAAGG
chr11	27276169	27276177	CCTTATAAGG
chr11	27604589	27604597	CCTTATAAGG
chr11	30312438	30312446	CCTTATAAGG
chr11	36405883	36405891	CCTTATAAGG
chr11	36539188	36539196	CCTTATAAGG
chr11	36937968	36937976	CCTTATAAGG
chr11	37442430	37442438	CCTTATAAGG
chr11	42670229	42670237	CCTTATAAGG
chr11	43873616	43873624	CCTTATAAGG
chr11	43873616	43873624	CCTTATAAGG
chr11	44519486	44519494	CCTTATAAGG
chr11	45179658	45179666	CCTTATAAGG
chr11	56950076	56950084	CCTTATAAGG
chr11	66403298	66403306	CCTTATAAGG
chr11	68204293	68204301	CCTTATAAGG
chr11	68962039	68962047	CCTTATAAGG
chr11	70619463	70619471	CCTTATAAGG
chr11	70630607	70630615	CCTTATAAGG
chr11	75580205	75580213	CCTTATAAGG
chr11	81196972	81196980	CCTTATAAGG
chr11	81202321	81202329	CCTTATAAGG
chr11	81983756	81983764	CCTTATAAGG
chr11	83391117	83391125	CCTTATAAGG
chr11	83767136	83767144	CCTTATAAGG
chr11	83851324	83851332	CCTTATAAGG
chr11	85966752	85966760	CCTTATAAGG
chr11	91233383	91233391	CCTTATAAGG
chr11	92200297	92200305	CCTTATAAGG
chr11	92573608	92573616	CCTTATAAGG
chr11	93265615	93265623	CCTTATAAGG
chr11	94278493	94278501	CCTTATAAGG
chr11	99757272	99757280	CCTTATAAGG
chr11	99757272	99757280	CCTTATAAGG
chr11	99757410	99757418	CCTTATAAGG
chr11	99757540	99757548	CCTTATAAGG
chr11	101145558	101145566	CCTTATAAGG
chr11	103890249	103890257	CCTTATAAGG
chr11	103890249	103890257	CCTTATAAGG
chr11	110867150	110867158	CCTTATAAGG
chr11	111204426	111204434	CCTTATAAGG
chr11	113012719	113012727	CCTTATAAGG
chr11	123251754	123251762	CCTTATAAGG
chr11	128675181	128675189	CCTTATAAGG
chr11	129687336	129687344	CCTTATAAGG
chr12	16453823	16453831	CCTTATAAGG
chr12	20085106	20085114	CCTTATAAGG
chr12	23013684	23013692	CCTTATAAGG
chr12	30151200	30151208	CCTTATAAGG
chr12	42927101	42927109	CCTTATAAGG
chr12	49459160	49459168	CCTTATAAGG
chr12	54690108	54690116	CCTTATAAGG
chr12	71482459	71482467	CCTTATAAGG
chr12	73161700	73161708	CCTTATAAGG
chr12	82836389	82836397	CCTTATAAGG
chr12	85707115	85707123	CCTTATAAGG
chr12	86103232	86103240	CCTTATAAGG
chr12	98019816	98019824	CCTTATAAGG
chr12	99800189	99800197	CCTTATAAGG
chr12	105405924	105405932	CCTTATAAGG
chr12	105651615	105651623	CCTTATAAGG
chr12	105651615	105651623	CCTTATAAGG
chr12	108418391	108418399	CCTTATAAGG
chr12	108418391	108418399	CCTTATAAGG
chr12	116549315	116549323	CCTTATAAGG
chr12	117709043	117709051	CCTTATAAGG
chr12	117709043	117709051	CCTTATAAGG
chr12	117802298	117802306	CCTTATAAGG
chr12	120002178	120002186	CCTTATAAGG
chr12	124949690	124949698	CCTTATAAGG
chr12	125530769	125530777	CCTTATAAGG
chr12	125927691	125927699	CCTTATAAGG
chr12	126738793	126738801	CCTTATAAGG
chr12	128726020	128726028	CCTTATAAGG
chr12	129405298	129405306	CCTTATAAGG
chr13	22494675	22494683	CCTTATAAGG
chr13	22891786	22891794	CCTTATAAGG
chr13	23996891	23996899	CCTTATAAGG
chr13	25044136	25044144	CCTTATAAGG
chr13	27324906	27324914	CCTTATAAGG
chr13	36796184	36796192	CCTTATAAGG
chr13	37670015	37670023	CCTTATAAGG
chr13	38150729	38150737	CCTTATAAGG
chr13	47799285	47799293	CCTTATAAGG
chr13	48870099	48870107	CCTTATAAGG
chr13	48935667	48935675	CCTTATAAGG
chr13	55871553	55871561	CCTTATAAGG
chr13	55871553	55871561	CCTTATAAGG
chr13	55879999	55880007	CCTTATAAGG
chr13	55879999	55880007	CCTTATAAGG
chr13	57466307	57466315	CCTTATAAGG
chr13	61940552	61940560	CCTTATAAGG
chr13	62895086	62895094	CCTTATAAGG
chr13	67657873	67657881	CCTTATAAGG
chr13	70821575	70821583	CCTTATAAGG
chr13	72552105	72552113	CCTTATAAGG
chr13	83801749	83801757	CCTTATAAGG
chr13	85481821	85481829	CCTTATAAGG
chr13	85481821	85481829	CCTTATAAGG
chr13	88465769	88465777	CCTTATAAGG
chr13	90287272	90287280	CCTTATAAGG
chr13	95650653	95650661	CCTTATAAGG
chr13	97336399	97336407	CCTTATAAGG
chr13	97919495	97919503	CCTTATAAGG
chr13	106324167	106324175	CCTTATAAGG
chr13	107052392	107052400	CCTTATAAGG
chr13	107422795	107422803	CCTTATAAGG
chr13	111688965	111688973	CCTTATAAGG
chr13	111774236	111774244	CCTTATAAGG
chr14	19978832	19978840	CCTTATAAGG
chr14	23663300	23663308	CCTTATAAGG
chr14	32479733	32479741	CCTTATAAGG
chr14	38249279	38249287	CCTTATAAGG
chr14	38327965	38327973	CCTTATAAGG
chr14	40240398	40240406	CCTTATAAGG
chr14	40974480	40974488	CCTTATAAGG
chr14	41347021	41347029	CCTTATAAGG
chr14	43673891	43673899	CCTTATAAGG
chr14	44365231	44365239	CCTTATAAGG
chr14	53936010	53936018	CCTTATAAGG
chr14	66042526	66042534	CCTTATAAGG
chr14	66454318	66454326	CCTTATAAGG
chr14	70769790	70769798	CCTTATAAGG
chr14	71983686	71983694	CCTTATAAGG
chr14	72916425	72916433	CCTTATAAGG
chr14	75171117	75171125	CCTTATAAGG
chr14	78754057	78754065	CCTTATAAGG
chr14	87229877	87229885	CCTTATAAGG
chr14	89888249	89888257	CCTTATAAGG
chr14	92972356	92972364	CCTTATAAGG
chr14	94353817	94353825	CCTTATAAGG
chr14	95074064	95074072	CCTTATAAGG
chr14	97958719	97958727	CCTTATAAGG
chr14	98896365	98896373	CCTTATAAGG
chr14	99071204	99071212	CCTTATAAGG
chr14	99111705	99111713	CCTTATAAGG
chr14	105518256	105518264	CCTTATAAGG
chr15	19932863	19932871	CCTTATAAGG
chr15	23538041	23538049	CCTTATAAGG
chr15	24515878	24515886	CCTTATAAGG
chr15	24515878	24515886	CCTTATAAGG
chr15	24515878	24515886	CCTTATAAGG
chr15	41589715	41589723	CCTTATAAGG
chr15	41589715	41589723	CCTTATAAGG
chr15	44031551	44031559	CCTTATAAGG
chr15	49654994	49655002	CCTTATAAGG
chr15	49654994	49655002	CCTTATAAGG
chr15	57760203	57760211	CCTTATAAGG
chr15	57760203	57760211	CCTTATAAGG
chr15	61753570	61753578	CCTTATAAGG
chr15	61753570	61753578	CCTTATAAGG
chr15	62894520	62894528	CCTTATAAGG
chr15	69402628	69402636	CCTTATAAGG
chr15	69615409	69615417	CCTTATAAGG
chr15	70158834	70158842	CCTTATAAGG
chr15	72405296	72405304	CCTTATAAGG
chr15	73725637	73725645	CCTTATAAGG
chr15	73725637	73725645	CCTTATAAGG
chr15	76079405	76079413	CCTTATAAGG
chr15	78329096	78329104	CCTTATAAGG
chr15	81722172	81722180	CCTTATAAGG
chr15	83597305	83597313	CCTTATAAGG
chr15	83762623	83762631	CCTTATAAGG
chr15	85930366	85930374	CCTTATAAGG
chr15	87073307	87073315	CCTTATAAGG
chr15	92914919	92914927	CCTTATAAGG
chr15	93647075	93647083	CCTTATAAGG
chr15	93763344	93763352	CCTTATAAGG
chr15	94203486	94203494	CCTTATAAGG
chr15	97765780	97765788	CCTTATAAGG
chr15	99929366	99929374	CCTTATAAGG
chr15	100729450	100729458	CCTTATAAGG
chr16	5769338	5769346	CCTTATAAGG
chr16	9651254	9651262	CCTTATAAGG
chr16	10000110	10000118	CCTTATAAGG
chr16	10231740	10231748	CCTTATAAGG
chr16	20252638	20252646	CCTTATAAGG
chr16	30351012	30351020	CCTTATAAGG
chr16	59427252	59427260	CCTTATAAGG
chr16	60333462	60333470	CCTTATAAGG
chr16	71087409	71087417	CCTTATAAGG
chr16	71087409	71087417	CCTTATAAGG
chr16	76319640	76319648	CCTTATAAGG
chr16	82153939	82153947	CCTTATAAGG
chr16	82597586	82597594	CCTTATAAGG
chr16	84349807	84349815	CCTTATAAGG
chr16	87820728	87820736	CCTTATAAGG
chr17	6309560	6309568	CCTTATAAGG
chr17	9011031	9011039	CCTTATAAGG
chr17	11146977	11146985	CCTTATAAGG
chr17	12461447	12461455	CCTTATAAGG
chr17	15493522	15493530	CCTTATAAGG
chr17	15719594	15719602	CCTTATAAGG
chr17	18659625	18659633	CCTTATAAGG
chr17	27974259	27974267	CCTTATAAGG
chr17	30547168	30547176	CCTTATAAGG
chr17	30547168	30547176	CCTTATAAGG
chr17	33212191	33212199	CCTTATAAGG
chr17	36060342	36060350	CCTTATAAGG
chr17	36107530	36107538	CCTTATAAGG
chr17	37528335	37528343	CCTTATAAGG
chr17	41108200	41108208	CCTTATAAGG
chr17	44545698	44545706	CCTTATAAGG
chr17	52167430	52167438	CCTTATAAGG
chr17	58632794	58632802	CCTTATAAGG
chr17	67329039	67329047	CCTTATAAGG
chr17	69751438	69751446	CCTTATAAGG
chr17	73104662	73104670	CCTTATAAGG
chr17	73788928	73788936	CCTTATAAGG
chr17	74072423	74072431	CCTTATAAGG
chr17	77636807	77636815	CCTTATAAGG
chr17	77708373	77708381	CCTTATAAGG
chr17	78103829	78103837	CCTTATAAGG
chr17	81305633	81305641	CCTTATAAGG
chr18	1243164	1243172	CCTTATAAGG
chr18	5320084	5320092	CCTTATAAGG
chr18	9001376	9001384	CCTTATAAGG
chr18	9812117	9812125	CCTTATAAGG
chr18	10326591	10326599	CCTTATAAGG
chr18	11236951	11236959	CCTTATAAGG
chr18	11566263	11566271	CCTTATAAGG
chr18	14616403	14616411	CCTTATAAGG
chr18	33861705	33861713	CCTTATAAGG
chr18	40339895	40339903	CCTTATAAGG
chr18	43594781	43594789	CCTTATAAGG
chr18	43735743	43735751	CCTTATAAGG
chr18	47454329	47454337	CCTTATAAGG
chr18	48866190	48866198	CCTTATAAGG
chr18	51524327	51524335	CCTTATAAGG
chr18	51946091	51946099	CCTTATAAGG
chr18	56320816	56320824	CCTTATAAGG
chr18	60412240	60412248	CCTTATAAGG
chr18	62488432	62488440	CCTTATAAGG
chr18	68310171	68310179	CCTTATAAGG
chr18	68511635	68511643	CCTTATAAGG
chr18	70760949	70760957	CCTTATAAGG
chr18	75640904	75640912	CCTTATAAGG
chr18	77499508	77499516	CCTTATAAGG
chr18	80012582	80012590	CCTTATAAGG
chr19	3539710	3539718	CCTTATAAGG
chr19	9301276	9301284	CCTTATAAGG
chr19	9301276	9301284	CCTTATAAGG
chr19	10057738	10057746	CCTTATAAGG
chr19	14325471	14325479	CCTTATAAGG
chr19	31170324	31170332	CCTTATAAGG
chr19	43565081	43565089	CCTTATAAGG
chr19	45576764	45576772	CCTTATAAGG
chr19	49790329	49790337	CCTTATAAGG
chr19	54245349	54245357	CCTTATAAGG
chr19	56623846	56623854	CCTTATAAGG
chr19	58323713	58323721	CCTTATAAGG
chr20	1480577	1480585	CCTTATAAGG
chr20	14533167	14533175	CCTTATAAGG
chr20	16948282	16948290	CCTTATAAGG
chr20	22520337	22520345	CCTTATAAGG
chr20	34816401	34816409	CCTTATAAGG
chr20	47079500	47079508	CCTTATAAGG
chr20	57734047	57734055	CCTTATAAGG
chr20	60192427	60192435	CCTTATAAGG
chr20	60716040	60716048	CCTTATAAGG
chr21	13541983	13541991	CCTTATAAGG
chr21	16333604	16333612	CCTTATAAGG
chr21	18605320	18605328	CCTTATAAGG
chr21	19697076	19697084	CCTTATAAGG
chr21	19697076	19697084	CCTTATAAGG
chr21	24022025	24022033	CCTTATAAGG
chr21	26357775	26357783	CCTTATAAGG
chr21	28276759	28276767	CCTTATAAGG
chr21	36974619	36974627	CCTTATAAGG
chr21	36974685	36974693	CCTTATAAGG
chr21	37802439	37802447	CCTTATAAGG
chr21	38339926	38339934	CCTTATAAGG
chr21	38339926	38339934	CCTTATAAGG
chr21	44594315	44594323	CCTTATAAGG
chr21	44594315	44594323	CCTTATAAGG
chr21	44942682	44942690	CCTTATAAGG
chr21	45329078	45329086	CCTTATAAGG
chr22	20296646	20296654	CCTTATAAGG
chr22	27450911	27450919	CCTTATAAGG
chr22	27491428	27491436	CCTTATAAGG
chr22	27933334	27933342	CCTTATAAGG
chr22	28986051	28986059	CCTTATAAGG
chr22	31954775	31954783	CCTTATAAGG
chr22	36133651	36133659	CCTTATAAGG
chr22	36222675	36222683	CCTTATAAGG
chr22	36222675	36222683	CCTTATAAGG
chr22	43494949	43494957	CCTTATAAGG
chr22	45074228	45074236	CCTTATAAGG
chr22	47483110	47483118	CCTTATAAGG
chrX	1312239	1312247	CCTTATAAGG
chrX	2424117	2424125	CCTTATAAGG
chrX	8940011	8940019	CCTTATAAGG
chrX	12438994	12439002	CCTTATAAGG
chrX	16488237	16488245	CCTTATAAGG
chrX	16488237	16488245	CCTTATAAGG
chrX	17214439	17214447	CCTTATAAGG
chrX	23314692	23314700	CCTTATAAGG
chrX	28798454	28798462	CCTTATAAGG
chrX	29153325	29153333	CCTTATAAGG
chrX	29346152	29346160	CCTTATAAGG
chrX	29618750	29618758	CCTTATAAGG
chrX	38347365	38347373	CCTTATAAGG
chrX	40307012	40307020	CCTTATAAGG
chrX	40307012	40307020	CCTTATAAGG
chrX	42859178	42859186	CCTTATAAGG
chrX	42859178	42859186	CCTTATAAGG
chrX	43530010	43530018	CCTTATAAGG
chrX	43530010	43530018	CCTTATAAGG
chrX	44449226	44449234	CCTTATAAGG
chrX	45366646	45366654	CCTTATAAGG
chrX	45366646	45366654	CCTTATAAGG
chrX	45649357	45649365	CCTTATAAGG
chrX	45649357	45649365	CCTTATAAGG
chrX	48532416	48532424	CCTTATAAGG
chrX	48532416	48532424	CCTTATAAGG
chrX	48745087	48745095	CCTTATAAGG
chrX	51846276	51846284	CCTTATAAGG
chrX	51852245	51852253	CCTTATAAGG
chrX	53444259	53444267	CCTTATAAGG
chrX	63503978	63503986	CCTTATAAGG
chrX	81347391	81347399	CCTTATAAGG
chrX	81948394	81948402	CCTTATAAGG
chrX	91258766	91258774	CCTTATAAGG
chrX	98332617	98332625	CCTTATAAGG
chrX	99376208	99376216	CCTTATAAGG
chrX	100568068	100568076	CCTTATAAGG
chrX	100568068	100568076	CCTTATAAGG
chrX	101075692	101075700	CCTTATAAGG
chrX	103103132	103103140	CCTTATAAGG
chrX	103966678	103966686	CCTTATAAGG
chrX	104072178	104072186	CCTTATAAGG
chrX	106399154	106399162	CCTTATAAGG
chrX	106399154	106399162	CCTTATAAGG
chrX	106462997	106463005	CCTTATAAGG
chrX	106462997	106463005	CCTTATAAGG
chrX	108243403	108243411	CCTTATAAGG
chrX	114208200	114208208	CCTTATAAGG
chrX	114208200	114208208	CCTTATAAGG
chrX	114921042	114921050	CCTTATAAGG
chrX	118318040	118318048	CCTTATAAGG
chrX	118884755	118884763	CCTTATAAGG
chrX	119375801	119375809	CCTTATAAGG
chrX	121530128	121530136	CCTTATAAGG
chrX	124196389	124196397	CCTTATAAGG
chrX	127289832	127289840	CCTTATAAGG
chrX	131167184	131167192	CCTTATAAGG
chrX	132263536	132263544	CCTTATAAGG
chrX	139302196	139302204	CCTTATAAGG
chrX	140557695	140557703	CCTTATAAGG
chrX	141887496	141887504	CCTTATAAGG
chrX	141887496	141887504	CCTTATAAGG
chrX	145412237	145412245	CCTTATAAGG
chrX	150808908	150808916	CCTTATAAGG
chrX	153044378	153044386	CCTTATAAGG
chrX	153597547	153597555	CCTTATAAGG
chrY	1312239	1312247	CCTTATAAGG
chrY	2424117	2424125	CCTTATAAGG
chrY	11792681	11792689	CCTTATAAGG
chrY	19179190	19179198	CCTTATAAGG
chrY	19645790	19645798	CCTTATAAGG
chrY	20559308	20559316	CCTTATAAGG
chrY	20977313	20977321	CCTTATAAGG
chr1	5688300	5688308	CCTGTACAGG
chr1	20051799	20051807	CCTGTACAGG
chr1	20051799	20051807	CCTGTACAGG
chr1	22996694	22996702	CCTGTACAGG
chr1	27691744	27691752	CCTGTACAGG
chr1	27691744	27691752	CCTGTACAGG
chr1	35128287	35128295	CCTGTACAGG
chr1	41959586	41959594	CCTGTACAGG
chr1	45575914	45575922	CCTGTACAGG
chr1	54521699	54521707	CCTGTACAGG
chr1	54775458	54775466	CCTGTACAGG
chr1	59706147	59706155	CCTGTACAGG
chr1	61858116	61858124	CCTGTACAGG
chr1	62335410	62335418	CCTGTACAGG
chr1	66917942	66917950	CCTGTACAGG
chr1	66917942	66917950	CCTGTACAGG
chr1	68509495	68509503	CCTGTACAGG
chr1	71337944	71337952	CCTGTACAGG
chr1	71337944	71337952	CCTGTACAGG
chr1	72692225	72692233	CCTGTACAGG
chr1	73861664	73861672	CCTGTACAGG
chr1	75865108	75865116	CCTGTACAGG
chr1	76129122	76129130	CCTGTACAGG
chr1	76693781	76693789	CCTGTACAGG
chr1	77525419	77525427	CCTGTACAGG
chr1	78969396	78969404	CCTGTACAGG
chr1	80160145	80160153	CCTGTACAGG
chr1	80160145	80160153	CCTGTACAGG
chr1	82896851	82896859	CCTGTACAGG
chr1	89314877	89314885	CCTGTACAGG
chr1	95897397	95897405	CCTGTACAGG
chr1	96154447	96154455	CCTGTACAGG
chr1	109454412	109454420	CCTGTACAGG
chr1	115590679	115590687	CCTGTACAGG
chr1	119485466	119485474	CCTGTACAGG
chr1	151077237	151077245	CCTGTACAGG
chr1	154317164	154317172	CCTGTACAGG
chr1	154317164	154317172	CCTGTACAGG
chr1	157359041	157359049	CCTGTACAGG
chr1	160721923	160721931	CCTGTACAGG
chr1	161297319	161297327	CCTGTACAGG
chr1	169816731	169816739	CCTGTACAGG
chr1	169816731	169816739	CCTGTACAGG
chr1	171216045	171216053	CCTGTACAGG
chr1	173498610	173498618	CCTGTACAGG
chr1	184903692	184903700	CCTGTACAGG
chr1	187008763	187008771	CCTGTACAGG
chr1	187008763	187008771	CCTGTACAGG
chr1	196685955	196685963	CCTGTACAGG
chr1	196685955	196685963	CCTGTACAGG
chr1	208565910	208565918	CCTGTACAGG
chr1	216348382	216348390	CCTGTACAGG
chr1	220716481	220716489	CCTGTACAGG
chr1	220716481	220716489	CCTGTACAGG
chr1	226613663	226613671	CCTGTACAGG
chr1	226613663	226613671	CCTGTACAGG
chr1	233727412	233727420	CCTGTACAGG
[truncated: 9,606 more rows]
