# Supplementary material for: Sequence Motif Analysis of PRDM9 and Short Inverted Repeats Suggests Their Contribution to Human Microdeletion and Microduplication Syndromes
Source: MDPI journal article supplement (doi:10.3390/biomedinformatics3020018), 2023-04-01
Supplement: s1 [file s1 › Table S3.xlsx]

## Sheet: PRDM9
#bin	swScore	milliDiv	milliDel	milliIns	genoName	genoStart	genoEnd	genoLeft	strand	repName	repClass	repFamily	repStart	repEnd	repLeft	id
2139	2143	128	7	0	chr2	203798046	203798344	-38395185	-	AluSz	SINE	Alu	-12	300	1	2
2065	339	260	124	29	chr3	194043235	194043409	-4252150	-	MIRc	SINE	MIR	-62	206	14	2
1078	2292	163	49	19	chr14	64621508	64621927	-42421791	+	MSTB1	LTR	ERVL-MaLR	1	432	0	1
1302	298	284	8	54	chr15	94094685	94094815	-7896374	+	MamRep488	DNA	hAT-Tip100	77	200	-19	1
586	358	318	32	1	chr17	182883	183037	-83074404	+	MIRb	SINE	MIR	55	214	-48	1
1096	869	230	57	5	chr17	67053434	67053635	-16203806	-	MER20	DNA	hAT-Charlie	0	219	8	1
916	41716	93	5	1	chr18	43494452	43500000	-36873285	+	HERVL-int	LTR	ERVL	4	5572	-82	1
830	520	275	84	32	chr19	32137683	32137923	-26479693	+	L2a	LINE	L2	3102	3387	0	1
286	650	318	121	82	chr1	223477437	223478294	-25478128	+	L2	LINE	L2	2115	3009	-410	3
1076	939	272	4	74	chr2	64376324	64376594	-177816935	-	MIR	SINE	MIR	0	262	12	2
1433	76	229	6	0	chr2	111251434	111251600	-130941929	+	(CACCAC)n	Simple_repeat	Simple_repeat	1	167	0	2
1433	76	229	6	0	chr2	111251434	111251600	-130941929	+	(CACCAC)n	Simple_repeat	Simple_repeat	1	167	0	2
1442	601	143	5	2	chr2	112346176	112347163	-129846366	+	(CCACCA)n	Simple_repeat	Simple_repeat	1	992	0	2
1442	601	143	5	2	chr2	112346176	112347163	-129846366	+	(CCACCA)n	Simple_repeat	Simple_repeat	1	992	0	2
1442	601	143	5	2	chr2	112346176	112347163	-129846366	+	(CCACCA)n	Simple_repeat	Simple_repeat	1	992	0	2
1442	601	143	5	2	chr2	112346176	112347163	-129846366	+	(CCACCA)n	Simple_repeat	Simple_repeat	1	992	0	2
1442	601	143	5	2	chr2	112346176	112347163	-129846366	+	(CCACCA)n	Simple_repeat	Simple_repeat	1	992	0	2
1442	601	143	5	2	chr2	112346176	112347163	-129846366	+	(CCACCA)n	Simple_repeat	Simple_repeat	1	992	0	2
1442	601	143	5	2	chr2	112346176	112347163	-129846366	+	(CCACCA)n	Simple_repeat	Simple_repeat	1	992	0	2
1442	601	143	5	2	chr2	112346176	112347163	-129846366	+	(CCACCA)n	Simple_repeat	Simple_repeat	1	992	0	2
1442	601	143	5	2	chr2	112346176	112347163	-129846366	+	(CCACCA)n	Simple_repeat	Simple_repeat	1	992	0	2
1442	601	143	5	2	chr2	112346176	112347163	-129846366	+	(CCACCA)n	Simple_repeat	Simple_repeat	1	992	0	2
1442	601	143	5	2	chr2	112346176	112347163	-129846366	+	(CCACCA)n	Simple_repeat	Simple_repeat	1	992	0	2
1442	601	143	5	2	chr2	112346176	112347163	-129846366	+	(CCACCA)n	Simple_repeat	Simple_repeat	1	992	0	2
1442	601	143	5	2	chr2	112346176	112347163	-129846366	+	(CCACCA)n	Simple_repeat	Simple_repeat	1	992	0	2
1442	601	143	5	2	chr2	112346176	112347163	-129846366	+	(CCACCA)n	Simple_repeat	Simple_repeat	1	992	0	2
1442	601	143	5	2	chr2	112346176	112347163	-129846366	+	(CCACCA)n	Simple_repeat	Simple_repeat	1	992	0	2
1442	601	143	5	2	chr2	112346176	112347163	-129846366	+	(CCACCA)n	Simple_repeat	Simple_repeat	1	992	0	2
1442	601	143	5	2	chr2	112346176	112347163	-129846366	+	(CCACCA)n	Simple_repeat	Simple_repeat	1	992	0	2
1442	601	143	5	2	chr2	112346176	112347163	-129846366	+	(CCACCA)n	Simple_repeat	Simple_repeat	1	992	0	2
1442	601	143	5	2	chr2	112346176	112347163	-129846366	+	(CCACCA)n	Simple_repeat	Simple_repeat	1	992	0	2
1442	601	143	5	2	chr2	112346176	112347163	-129846366	+	(CCACCA)n	Simple_repeat	Simple_repeat	1	992	0	2
1442	601	143	5	2	chr2	112346176	112347163	-129846366	+	(CCACCA)n	Simple_repeat	Simple_repeat	1	992	0	2
1442	601	143	5	2	chr2	112346176	112347163	-129846366	+	(CCACCA)n	Simple_repeat	Simple_repeat	1	992	0	2
1442	601	143	5	2	chr2	112346176	112347163	-129846366	+	(CCACCA)n	Simple_repeat	Simple_repeat	1	992	0	2
1442	601	143	5	2	chr2	112346176	112347163	-129846366	+	(CCACCA)n	Simple_repeat	Simple_repeat	1	992	0	2
1442	601	143	5	2	chr2	112346176	112347163	-129846366	+	(CCACCA)n	Simple_repeat	Simple_repeat	1	992	0	2
1442	601	143	5	2	chr2	112346176	112347163	-129846366	+	(CCACCA)n	Simple_repeat	Simple_repeat	1	992	0	2
1442	601	143	5	2	chr2	112346176	112347163	-129846366	+	(CCACCA)n	Simple_repeat	Simple_repeat	1	992	0	2
1442	601	143	5	2	chr2	112346176	112347163	-129846366	+	(CCACCA)n	Simple_repeat	Simple_repeat	1	992	0	2
1442	601	143	5	2	chr2	112346176	112347163	-129846366	+	(CCACCA)n	Simple_repeat	Simple_repeat	1	992	0	2
1442	601	143	5	2	chr2	112346176	112347163	-129846366	+	(CCACCA)n	Simple_repeat	Simple_repeat	1	992	0	2
1442	601	143	5	2	chr2	112346176	112347163	-129846366	+	(CCACCA)n	Simple_repeat	Simple_repeat	1	992	0	2
1442	601	143	5	2	chr2	112346176	112347163	-129846366	+	(CCACCA)n	Simple_repeat	Simple_repeat	1	992	0	2
1442	601	143	5	2	chr2	112346176	112347163	-129846366	+	(CCACCA)n	Simple_repeat	Simple_repeat	1	992	0	2
1442	601	143	5	2	chr2	112346176	112347163	-129846366	+	(CCACCA)n	Simple_repeat	Simple_repeat	1	992	0	2
1442	601	143	5	2	chr2	112346176	112347163	-129846366	+	(CCACCA)n	Simple_repeat	Simple_repeat	1	992	0	2
1442	601	143	5	2	chr2	112346176	112347163	-129846366	+	(CCACCA)n	Simple_repeat	Simple_repeat	1	992	0	2
1442	601	143	5	2	chr2	112346176	112347163	-129846366	+	(CCACCA)n	Simple_repeat	Simple_repeat	1	992	0	2
1442	33010	71	7	7	chr2	112347166	112347904	-129845625	-	Harlequin-int	LTR	ERV1	-575	6321	5595	2
1442	601	143	5	2	chr2	112346176	112347163	-129846366	+	(CCACCA)n	Simple_repeat	Simple_repeat	1	992	0	2
1442	33010	71	7	7	chr2	112347166	112347904	-129845625	-	Harlequin-int	LTR	ERV1	-575	6321	5595	2
1536	180	293	2	2	chr2	124771660	124772140	-117421389	+	(CCACCA)n	Simple_repeat	Simple_repeat	1	481	0	2
2021	567	303	14	59	chr2	188327861	188328081	-53865448	+	Arthur1B	DNA	hAT-Tip100	308	517	-708	2
2104	2268	268	93	60	chr2	199169349	199171260	-43022269	+	L1MCc	LINE	L1	102	2164	-4964	2
2136	54	19	0	0	chr2	203392263	203392316	-38801213	+	(CAC)n	Simple_repeat	Simple_repeat	1	53	0	2
2136	29	26	26	0	chr2	203392316	203392355	-38801174	+	(ACA)n	Simple_repeat	Simple_repeat	1	40	0	2
2142	4630	175	13	21	chr2	204157499	204158276	-38035253	-	L1MB7	LINE	L1	-16	6168	5398	2
2347	379	227	0	1	chr2	231004911	231005685	-11187844	+	(CAC)n	Simple_repeat	Simple_repeat	1	774	0	2
2347	379	227	0	1	chr2	231004911	231005685	-11187844	+	(CAC)n	Simple_repeat	Simple_repeat	1	774	0	2
2347	379	227	0	1	chr2	231004911	231005685	-11187844	+	(CAC)n	Simple_repeat	Simple_repeat	1	774	0	2
2347	379	227	0	1	chr2	231004911	231005685	-11187844	+	(CAC)n	Simple_repeat	Simple_repeat	1	774	0	2
2347	379	227	0	1	chr2	231004911	231005685	-11187844	+	(CAC)n	Simple_repeat	Simple_repeat	1	774	0	2
2347	379	227	0	1	chr2	231004911	231005685	-11187844	+	(CAC)n	Simple_repeat	Simple_repeat	1	774	0	2
2351	709	94	1	1	chr2	231578829	231579822	-10613707	+	(CATCAT)n	Simple_repeat	Simple_repeat	1	994	0	2
659	313	255	33	118	chr3	9722818	9722978	-188572581	+	L2b	LINE	L2	3013	3163	-224	2
961	2450	86	0	3	chr3	49318626	49318929	-148976630	+	AluSx	SINE	Alu	1	302	-10	2
961	13	88	0	0	chr3	49318929	49318947	-148976612	+	(ACC)n	Simple_repeat	Simple_repeat	1	18	0	2
1249	16	116	0	0	chr3	87158454	87158482	-111137077	+	(ACC)n	Simple_repeat	Simple_repeat	1	28	0	2
2078	354	167	2	3	chr3	195767361	195767980	-2527579	+	(ACCACC)n	Simple_repeat	Simple_repeat	1	620	0	2
2078	354	167	2	3	chr3	195767361	195767980	-2527579	+	(ACCACC)n	Simple_repeat	Simple_repeat	1	620	0	2
2078	354	167	2	3	chr3	195767361	195767980	-2527579	+	(ACCACC)n	Simple_repeat	Simple_repeat	1	620	0	2
2078	354	167	2	3	chr3	195767361	195767980	-2527579	+	(ACCACC)n	Simple_repeat	Simple_repeat	1	620	0	2
2078	354	167	2	3	chr3	195767361	195767980	-2527579	+	(ACCACC)n	Simple_repeat	Simple_repeat	1	620	0	2
2078	354	167	2	3	chr3	195767361	195767980	-2527579	+	(ACCACC)n	Simple_repeat	Simple_repeat	1	620	0	2
2078	354	167	2	3	chr3	195767361	195767980	-2527579	+	(ACCACC)n	Simple_repeat	Simple_repeat	1	620	0	2
2078	354	167	2	3	chr3	195767361	195767980	-2527579	+	(ACCACC)n	Simple_repeat	Simple_repeat	1	620	0	2
2078	354	167	2	3	chr3	195767361	195767980	-2527579	+	(ACCACC)n	Simple_repeat	Simple_repeat	1	620	0	2
2078	354	167	2	3	chr3	195767361	195767980	-2527579	+	(ACCACC)n	Simple_repeat	Simple_repeat	1	620	0	2
2078	354	167	2	3	chr3	195767361	195767980	-2527579	+	(ACCACC)n	Simple_repeat	Simple_repeat	1	620	0	2
2078	354	167	2	3	chr3	195767361	195767980	-2527579	+	(ACCACC)n	Simple_repeat	Simple_repeat	1	620	0	2
2093	21	68	0	0	chr3	197709300	197709331	-586228	+	(ACC)n	Simple_repeat	Simple_repeat	1	31	0	2
596	14	159	0	0	chr4	1451833	1451861	-188762694	+	(CCA)n	Simple_repeat	Simple_repeat	1	28	0	2
596	634	296	21	4	chr4	1452298	1454217	-188760338	+	(CAT)n	Simple_repeat	Simple_repeat	1	1959	0	2
596	634	296	21	4	chr4	1452298	1454217	-188760338	+	(CAT)n	Simple_repeat	Simple_repeat	1	1959	0	2
596	634	296	21	4	chr4	1452298	1454217	-188760338	+	(CAT)n	Simple_repeat	Simple_repeat	1	1959	0	2
596	634	296	21	4	chr4	1452298	1454217	-188760338	+	(CAT)n	Simple_repeat	Simple_repeat	1	1959	0	2
641	821	202	1	2	chr5	7371288	7372886	-174165373	+	(CCA)n	Simple_repeat	Simple_repeat	1	1599	0	3
641	821	202	1	2	chr5	7371288	7372886	-174165373	+	(CCA)n	Simple_repeat	Simple_repeat	1	1599	0	3
641	821	202	1	2	chr5	7371288	7372886	-174165373	+	(CCA)n	Simple_repeat	Simple_repeat	1	1599	0	3
641	821	202	1	2	chr5	7371288	7372886	-174165373	+	(CCA)n	Simple_repeat	Simple_repeat	1	1599	0	3
641	821	202	1	2	chr5	7371288	7372886	-174165373	+	(CCA)n	Simple_repeat	Simple_repeat	1	1599	0	3
641	821	202	1	2	chr5	7371288	7372886	-174165373	+	(CCA)n	Simple_repeat	Simple_repeat	1	1599	0	3
641	821	202	1	2	chr5	7371288	7372886	-174165373	+	(CCA)n	Simple_repeat	Simple_repeat	1	1599	0	3
641	821	202	1	2	chr5	7371288	7372886	-174165373	+	(CCA)n	Simple_repeat	Simple_repeat	1	1599	0	3
641	821	202	1	2	chr5	7371288	7372886	-174165373	+	(CCA)n	Simple_repeat	Simple_repeat	1	1599	0	3
641	821	202	1	2	chr5	7371288	7372886	-174165373	+	(CCA)n	Simple_repeat	Simple_repeat	1	1599	0	3
641	821	202	1	2	chr5	7371288	7372886	-174165373	+	(CCA)n	Simple_repeat	Simple_repeat	1	1599	0	3
641	821	202	1	2	chr5	7371288	7372886	-174165373	+	(CCA)n	Simple_repeat	Simple_repeat	1	1599	0	3
641	821	202	1	2	chr5	7371288	7372886	-174165373	+	(CCA)n	Simple_repeat	Simple_repeat	1	1599	0	3
641	821	202	1	2	chr5	7371288	7372886	-174165373	+	(CCA)n	Simple_repeat	Simple_repeat	1	1599	0	3
641	821	202	1	2	chr5	7371288	7372886	-174165373	+	(CCA)n	Simple_repeat	Simple_repeat	1	1599	0	3
641	821	202	1	2	chr5	7371288	7372886	-174165373	+	(CCA)n	Simple_repeat	Simple_repeat	1	1599	0	3
641	821	202	1	2	chr5	7371288	7372886	-174165373	+	(CCA)n	Simple_repeat	Simple_repeat	1	1599	0	3
644	612	241	58	12	chr5	7741324	7741488	-173796771	+	MIR	SINE	MIR	83	254	-8	3
644	182	264	6	11	chr5	7741495	7741961	-173796298	+	(CATCAT)n	Simple_repeat	Simple_repeat	1	469	0	3
656	133	290	6	0	chr5	9407862	9408219	-172130040	+	(ACC)n	Simple_repeat	Simple_repeat	1	359	0	3
656	133	290	6	0	chr5	9407862	9408219	-172130040	+	(ACC)n	Simple_repeat	Simple_repeat	1	359	0	3
660	11	128	88	0	chr5	9863113	9863147	-171675112	+	A-rich	Low_complexity	Low_complexity	1	37	0	3
660	207	343	14	95	chr5	9863217	9863264	-171674995	-	MIR3	SINE	MIR	-51	157	112	3
1937	1564	115	141	21	chr5	177271866	177272109	-4266150	+	AluSx3	SINE	Alu	2	278	-33	3
1937	13	171	49	23	chr5	177272113	177272154	-4266105	+	(CCA)n	Simple_repeat	Simple_repeat	1	43	0	3
1937	14	88	0	0	chr5	177272153	177272177	-4266082	+	(AAGA)n	Simple_repeat	Simple_repeat	1	24	0	3
609	229	133	11	3	chr6	3221952	3222326	-167583653	+	(CAC)n	Simple_repeat	Simple_repeat	1	378	0	3
609	229	133	11	3	chr6	3221952	3222326	-167583653	+	(CAC)n	Simple_repeat	Simple_repeat	1	378	0	3
609	229	133	11	3	chr6	3221952	3222326	-167583653	+	(CAC)n	Simple_repeat	Simple_repeat	1	378	0	3
609	229	133	11	3	chr6	3221952	3222326	-167583653	+	(CAC)n	Simple_repeat	Simple_repeat	1	378	0	3
609	229	133	11	3	chr6	3221952	3222326	-167583653	+	(CAC)n	Simple_repeat	Simple_repeat	1	378	0	3
630	184	298	0	0	chr6	5923613	5923660	-164882319	+	MIR	SINE	MIR	215	261	-1	3
630	40	252	0	0	chr6	5923664	5923758	-164882221	+	(ACC)n	Simple_repeat	Simple_repeat	1	94	0	3
632	484	349	40	5	chr6	6242887	6243080	-164562899	+	L2c	LINE	L2	3188	3387	0	3
632	121	240	10	7	chr6	6243096	6243384	-164562595	+	(ACC)n	Simple_repeat	Simple_repeat	1	291	0	3
840	22	67	0	0	chr6	33443419	33443451	-137362528	+	(CCA)n	Simple_repeat	Simple_repeat	1	32	0	3
1784	1485	182	72	52	chr6	157254018	157254400	-13551579	-	L1MB8	LINE	L1	-6	6172	5783	3
1784	202	231	30	12	chr6	157270153	157270710	-13535269	+	(CCATCA)n	Simple_repeat	Simple_repeat	1	574	0	3
1784	202	231	30	12	chr6	157270153	157270710	-13535269	+	(CCATCA)n	Simple_repeat	Simple_repeat	1	574	0	3
1784	202	231	30	12	chr6	157270153	157270710	-13535269	+	(CCATCA)n	Simple_repeat	Simple_repeat	1	574	0	3
1849	67	389	39	5	chr6	165749153	165749534	-5056445	+	(CTATCA)n	Simple_repeat	Simple_repeat	1	396	0	3
1863	226	312	16	48	chr6	167590205	167591393	-3214586	+	(CAC)n	Simple_repeat	Simple_repeat	1	1207	0	3
1864	123	275	3	6	chr6	167641398	167641673	-3164306	+	(ACC)n	Simple_repeat	Simple_repeat	1	331	0	3
1864	123	275	3	6	chr6	167641398	167641673	-3164306	+	(ACC)n	Simple_repeat	Simple_repeat	1	331	0	3
1864	123	275	3	6	chr6	167641398	167641673	-3164306	+	(ACC)n	Simple_repeat	Simple_repeat	1	331	0	3
1865	79	296	6	86	chr6	167789956	167790465	-3015514	+	(CCACCC)n	Simple_repeat	Simple_repeat	1	512	0	3
1866	769	248	189	6	chr6	167987307	167987640	-2818339	-	MLT1A1	LTR	ERVL-MaLR	0	408	1	3
1866	330	281	56	89	chr6	167987640	167987700	-2818279	-	L1ME1	LINE	L1	-103	6076	6018	3
1867	181	289	13	6	chr6	168119567	168120101	-2685878	+	(ATC)n	Simple_repeat	Simple_repeat	1	541	0	3
1881	285	295	17	18	chr6	169923529	169924449	-881530	+	(TCATCA)n	Simple_repeat	Simple_repeat	1	936	0	3
1881	332	316	68	56	chr6	169924461	169924622	-881357	-	MIRb	SINE	MIR	-11	257	95	3
1171	2184	176	47	13	chr7	76887527	76887976	-82457997	-	L1MD1	LINE	L1	0	6242	5778	3
668	85	278	12	12	chr8	11003259	11003507	-134135129	+	(CAT)n	Simple_repeat	Simple_repeat	1	251	0	3
760	19	72	0	0	chr8	23007217	23007246	-122131390	+	(CAC)n	Simple_repeat	Simple_repeat	1	29	0	3
787	420	333	126	35	chr8	26480927	26481351	-118657285	+	L2b	LINE	L2	2258	2725	-694	3
1300	20	224	0	0	chr8	93828303	93828350	-51310286	+	(CAC)n	Simple_repeat	Simple_repeat	1	47	0	3
1300	19	289	0	16	chr8	93828350	93828364	-51310272	+	(ACA)n	Simple_repeat	Simple_repeat	2	62	0	3
1351	262	166	2	11	chr8	100426437	100426909	-44711727	+	(CAC)n	Simple_repeat	Simple_repeat	1	473	0	3
1351	262	166	2	11	chr8	100426437	100426909	-44711727	+	(CAC)n	Simple_repeat	Simple_repeat	1	473	0	3
588	208	335	3	0	chr9	401124	401203	-137993514	+	MIR3	SINE	MIR	71	150	-80	4
588	208	335	3	0	chr9	401124	401203	-137993514	+	MIR3	SINE	MIR	71	150	-80	4
632	6050	125	31	13	chr9	6240502	6241510	-132153207	-	Tigger3b	DNA	TcMar-Tigger	-198	1033	7	4
1313	742	223	69	6	chr9	95421846	95422022	-42972695	+	MER63A	DNA	hAT-Blackjack	23	210	0	4
1313	328	325	75	41	chr9	95422045	95422263	-42972454	+	L1MC4	LINE	L1	612	837	-5378	4
1315	160	223	0	11	chr9	95705713	95706061	-42688656	+	(CAC)n	Simple_repeat	Simple_repeat	1	348	0	4
1315	160	223	0	11	chr9	95705713	95706061	-42688656	+	(CAC)n	Simple_repeat	Simple_repeat	1	348	0	4
1214	125	330	0	2	chr10	82461001	82461395	-51336027	+	(CAC)n	Simple_repeat	Simple_repeat	1	394	0	4
1242	266	234	29	11	chr10	86116942	86117657	-47679765	+	(ACCATC)n	Simple_repeat	Simple_repeat	1	736	0	4
1242	266	234	29	11	chr10	86116942	86117657	-47679765	+	(ACCATC)n	Simple_repeat	Simple_repeat	1	736	0	4
1242	266	234	29	11	chr10	86116942	86117657	-47679765	+	(ACCATC)n	Simple_repeat	Simple_repeat	1	736	0	4
1242	266	234	29	11	chr10	86116942	86117657	-47679765	+	(ACCATC)n	Simple_repeat	Simple_repeat	1	736	0	4
1525	743	201	30	2	chr10	123254329	123255943	-10541479	+	(CAC)n	Simple_repeat	Simple_repeat	1	1663	0	5
1525	743	201	30	2	chr10	123254329	123255943	-10541479	+	(CAC)n	Simple_repeat	Simple_repeat	1	1663	0	5
1525	743	201	30	2	chr10	123254329	123255943	-10541479	+	(CAC)n	Simple_repeat	Simple_repeat	1	1663	0	5
1525	743	201	30	2	chr10	123254329	123255943	-10541479	+	(CAC)n	Simple_repeat	Simple_repeat	1	1663	0	5
929	25	249	27	0	chr11	45093557	45093630	-89992992	+	(CAC)n	Simple_repeat	Simple_repeat	1	75	0	6
1507	167	260	3	0	chr11	120876110	120876499	-14210123	+	(CAC)n	Simple_repeat	Simple_repeat	1	390	0	7
1590	76	424	0	8	chr11	131828258	131828651	-3257971	+	(CAC)n	Simple_repeat	Simple_repeat	1	393	0	7
1609	385	153	1	5	chr11	134308043	134308696	-777926	+	(CCA)n	Simple_repeat	Simple_repeat	1	654	0	7
1609	385	153	1	5	chr11	134308043	134308696	-777926	+	(CCA)n	Simple_repeat	Simple_repeat	1	654	0	7
1609	385	153	1	5	chr11	134308043	134308696	-777926	+	(CCA)n	Simple_repeat	Simple_repeat	1	654	0	7
1609	385	153	1	5	chr11	134308043	134308696	-777926	+	(CCA)n	Simple_repeat	Simple_repeat	1	654	0	7
1609	385	153	1	5	chr11	134308043	134308696	-777926	+	(CCA)n	Simple_repeat	Simple_repeat	1	654	0	7
761	22	307	11	21	chr13	23134601	23134693	-91229635	+	(CCCCCA)n	Simple_repeat	Simple_repeat	1	93	0	9
761	19	325	19	28	chr13	23134693	23134705	-91229623	+	(CCA)n	Simple_repeat	Simple_repeat	1	106	0	9
1347	14	127	0	0	chr13	99982136	99982162	-14382166	+	(GCG)n	Simple_repeat	Simple_repeat	1	26	0	1
804	36	67	0	0	chr14	28767404	28767451	-78276267	+	(CCA)n	Simple_repeat	Simple_repeat	1	47	0	1
804	62	235	6	29	chr14	28767451	28767624	-78276094	+	(CGC)n	Simple_repeat	Simple_repeat	1	174	0	1
1038	2358	144	101	20	chr14	59420106	59420614	-47623104	-	L1MB8	LINE	L1	-9	6169	5616	1
1349	19	296	0	0	chr14	100239372	100239449	-6804269	+	(CGACGG)n	Simple_repeat	Simple_repeat	1	77	0	1
1349	33	29	0	0	chr14	100239450	100239485	-6804233	+	(CCA)n	Simple_repeat	Simple_repeat	1	35	0	1
1351	151	406	9	7	chr14	100526640	100527377	-6516341	+	(ACC)n	Simple_repeat	Simple_repeat	1	744	0	1
1351	151	406	9	7	chr14	100526640	100527377	-6516341	+	(ACC)n	Simple_repeat	Simple_repeat	1	744	0	1
826	2598	86	0	16	chr15	31657344	31657659	-70333530	-	AluY	SINE	Alu	0	311	2	1
857	2688	241	55	24	chr15	35737218	35738360	-66252829	-	L1M5	LINE	L1	-483	5690	4549	1
1144	15	45	0	40	chr15	73399607	73399653	-28591536	+	(CCA)n	Simple_repeat	Simple_repeat	1	44	0	1
1295	28	402	18	0	chr15	93174497	93174660	-8816529	+	(ACC)n	Simple_repeat	Simple_repeat	1	166	0	1
1295	653	290	57	5	chr15	93174661	93174862	-8816327	-	MIRb	SINE	MIR	-11	257	46	1
1339	820	229	92	9	chr15	98839129	98839358	-3151831	-	MIR	SINE	MIR	-11	251	2	1
1339	15	132	29	28	chr15	98839375	98839421	-3151768	+	(CCA)n	Simple_repeat	Simple_repeat	1	46	0	1
1360	284	349	20	0	chr15	101673372	101673483	-317706	-	MIRb	SINE	MIR	-3	259	147	1
1360	19	220	0	0	chr15	101673483	101673528	-317661	+	(CATCAC)n	Simple_repeat	Simple_repeat	1	45	0	1
766	1901	115	4	0	chr16	23828098	23828351	-66509994	-	AluSz	SINE	Alu	-58	254	1	1
766	1292	153	18	5	chr16	23828351	23828567	-66509778	-	L1MB2	LINE	L1	-41	6142	5924	1
778	707	286	116	72	chr16	25421865	25421940	-64916405	-	LTR16E1	LTR	ERVL	-3	535	471	1
778	1712	259	73	7	chr16	25421940	25422372	-64915973	+	LTR16B	LTR	ERVL	1	463	0	1
787	225	326	4	1	chr16	26542135	26542702	-63795643	+	(ACC)n	Simple_repeat	Simple_repeat	1	569	0	1
787	225	326	4	1	chr16	26542135	26542702	-63795643	+	(ACC)n	Simple_repeat	Simple_repeat	1	569	0	1
787	3411	83	0	71	chr16	26542702	26543180	-63795165	-	MLT2A1	LTR	ERVL	0	444	1	1
807	142	285	8	10	chr16	29226845	29227243	-61111102	+	(CAT)n	Simple_repeat	Simple_repeat	1	401	0	1
807	142	285	8	10	chr16	29226845	29227243	-61111102	+	(CAT)n	Simple_repeat	Simple_repeat	1	401	0	1
807	142	285	8	10	chr16	29226845	29227243	-61111102	+	(CAT)n	Simple_repeat	Simple_repeat	1	401	0	1
807	142	285	8	10	chr16	29226845	29227243	-61111102	+	(CAT)n	Simple_repeat	Simple_repeat	1	401	0	1
942	15	48	0	0	chr16	46827260	46827282	-43511063	+	(CAC)n	Simple_repeat	Simple_repeat	1	22	0	1
1237	255	176	33	15	chr16	85519197	85519771	-4818574	+	(CATCAC)n	Simple_repeat	Simple_repeat	1	593	0	1
1237	255	176	33	15	chr16	85519197	85519771	-4818574	+	(CATCAC)n	Simple_repeat	Simple_repeat	1	593	0	1
1241	152	221	14	6	chr16	86013783	86014131	-4324214	+	(CATCAT)n	Simple_repeat	Simple_repeat	1	353	0	1
726	46	0	0	0	chr17	18582520	18582559	-64674882	+	(TG)n	Simple_repeat	Simple_repeat	1	39	0	1
820	425	248	101	68	chr17	30846002	30846293	-52411148	-	L1ME2	LINE	L1	-279	6165	5868	1
941	360	247	149	0	chr17	46767550	46767647	-36489794	-	MIR3	SINE	MIR	-65	143	30	1
941	360	247	149	0	chr17	46767550	46767647	-36489794	-	MIR3	SINE	MIR	-65	143	30	1
613	472	204	14	1	chr18	3740679	3741642	-76631643	+	(ACC)n	Simple_repeat	Simple_repeat	1	977	0	1
613	472	204	14	1	chr18	3740679	3741642	-76631643	+	(ACC)n	Simple_repeat	Simple_repeat	1	977	0	1
613	472	204	14	1	chr18	3740679	3741642	-76631643	+	(ACC)n	Simple_repeat	Simple_repeat	1	977	0	1
613	472	204	14	1	chr18	3740679	3741642	-76631643	+	(ACC)n	Simple_repeat	Simple_repeat	1	977	0	1
613	472	204	14	1	chr18	3740679	3741642	-76631643	+	(ACC)n	Simple_repeat	Simple_repeat	1	977	0	1
684	96	325	26	39	chr18	13106220	13106509	-67266776	+	(CCACCA)n	Simple_repeat	Simple_repeat	1	287	0	1
908	19	40	0	0	chr18	42445680	42445706	-37927579	+	(ACC)n	Simple_repeat	Simple_repeat	1	26	0	1
928	6033	149	69	15	chr18	44986957	44987247	-35386038	-	Tigger3b	DNA	TcMar-Tigger	-933	298	2	1
1174	1869	110	0	12	chr18	77252599	77252854	-3120431	+	AluSx1	SINE	Alu	35	286	-26	1
1174	184	52	0	0	chr18	77252854	77253057	-3120228	+	(CAC)n	Simple_repeat	Simple_repeat	1	203	0	1
1174	1869	110	0	12	chr18	77252599	77252854	-3120431	+	AluSx1	SINE	Alu	35	286	-26	1
1174	184	52	0	0	chr18	77252854	77253057	-3120228	+	(CAC)n	Simple_repeat	Simple_repeat	1	203	0	1
1174	184	52	0	0	chr18	77252854	77253057	-3120228	+	(CAC)n	Simple_repeat	Simple_repeat	1	203	0	1
1174	184	52	0	0	chr18	77252854	77253057	-3120228	+	(CAC)n	Simple_repeat	Simple_repeat	1	203	0	1
1174	184	52	0	0	chr18	77252854	77253057	-3120228	+	(CAC)n	Simple_repeat	Simple_repeat	1	203	0	1
1174	184	52	0	0	chr18	77252854	77253057	-3120228	+	(CAC)n	Simple_repeat	Simple_repeat	1	203	0	1
1174	184	52	0	0	chr18	77252854	77253057	-3120228	+	(CAC)n	Simple_repeat	Simple_repeat	1	203	0	1
1174	184	52	0	0	chr18	77252854	77253057	-3120228	+	(CAC)n	Simple_repeat	Simple_repeat	1	203	0	1
1174	184	52	0	0	chr18	77252854	77253057	-3120228	+	(CAC)n	Simple_repeat	Simple_repeat	1	203	0	1
1174	184	52	0	0	chr18	77252854	77253057	-3120228	+	(CAC)n	Simple_repeat	Simple_repeat	1	203	0	1
849	823	129	8	0	chr19	34640588	34640720	-23976896	-	L1MB3	LINE	L1	0	6183	6051	1
849	1695	187	73	19	chr19	34644339	34644794	-23972822	-	L1MB4	LINE	L1	0	6180	5731	1
1069	591	145	32	0	chr20	63442546	63443618	-1000549	+	(CATCAC)n	Simple_repeat	Simple_repeat	1	1106	0	2
1069	591	145	32	0	chr20	63442546	63443618	-1000549	+	(CATCAC)n	Simple_repeat	Simple_repeat	1	1106	0	2
1069	591	145	32	0	chr20	63442546	63443618	-1000549	+	(CATCAC)n	Simple_repeat	Simple_repeat	1	1106	0	2
1069	591	145	32	0	chr20	63442546	63443618	-1000549	+	(CATCAC)n	Simple_repeat	Simple_repeat	1	1106	0	2
1069	591	145	32	0	chr20	63442546	63443618	-1000549	+	(CATCAC)n	Simple_repeat	Simple_repeat	1	1106	0	2
1069	591	145	32	0	chr20	63442546	63443618	-1000549	+	(CATCAC)n	Simple_repeat	Simple_repeat	1	1106	0	2
1069	591	145	32	0	chr20	63442546	63443618	-1000549	+	(CATCAC)n	Simple_repeat	Simple_repeat	1	1106	0	2
1069	591	145	32	0	chr20	63442546	63443618	-1000549	+	(CATCAC)n	Simple_repeat	Simple_repeat	1	1106	0	2
1069	591	145	32	0	chr20	63442546	63443618	-1000549	+	(CATCAC)n	Simple_repeat	Simple_repeat	1	1106	0	2
1069	591	145	32	0	chr20	63442546	63443618	-1000549	+	(CATCAC)n	Simple_repeat	Simple_repeat	1	1106	0	2
1069	591	145	32	0	chr20	63442546	63443618	-1000549	+	(CATCAC)n	Simple_repeat	Simple_repeat	1	1106	0	2
716	72	317	38	17	chrX	17262834	17263180	-138777715	+	(CACCAT)n	Simple_repeat	Simple_repeat	1	359	0	4
762	489	278	43	51	chrX	23209145	23209484	-132831411	+	L2c	LINE	L2	2985	3420	-6	4
1418	20	51	91	42	chrX	109273431	109273477	-46767418	+	(AC)n	Simple_repeat	Simple_repeat	1	48	0	4
742	15648	165	38	31	chrY	20666039	20667478	-36559937	+	LTR46-int	LTR	ERV1	991	2468	-4517	4
742	15648	165	38	31	chrY	20666039	20667478	-36559937	+	LTR46-int	LTR	ERV1	991	2468	-4517	4
1858	49665	49	13	12	chr6	166891601	166897615	-3908364	+	HERV17-int	LTR	ERV1	1	6019	-2607	3
1636	344	286	29	12	chr9	137842734	137842921	-551796	-	L1ME2	LINE	L1	-397	6047	5861	4
1636	344	286	29	12	chr9	137842734	137842921	-551796	-	L1ME2	LINE	L1	-397	6047	5861	4
1636	344	286	29	12	chr9	137842734	137842921	-551796	-	L1ME2	LINE	L1	-397	6047	5861	4
1636	344	286	29	12	chr9	137842734	137842921	-551796	-	L1ME2	LINE	L1	-397	6047	5861	4
1234	1716	163	3	14	chr15	85066278	85066560	-16924629	+	AluSz6	SINE	Alu	1	279	-33	1
1234	69	0	0	0	chr15	85066583	85066642	-16924547	+	(AC)n	Simple_repeat	Simple_repeat	1	59	0	1
794	524	273	52	95	chr16	27437163	27437406	-62900939	+	L3	LINE	CR1	3865	4096	-3	1
605	2561	53	0	3	chr17	2723186	2723490	-80533951	-	AluSq	SINE	Alu	-10	303	1	1
762	1311	178	9	9	chr22	23200316	23200530	-27617938	-	AluJb	SINE	Alu	-12	300	87	2
2023	553	350	105	69	chr3	188582478	188583058	-9712501	+	L2a	LINE	L2	2223	2841	-578	2
1027	13	98	0	0	chr1	58048666	58048688	-190907734	+	(ACC)n	Simple_repeat	Simple_repeat	1	22	0	1
2449	1387	159	95	25	chr1	244420701	244420984	-4535438	-	AluJb	SINE	Alu	-7	305	1	3
1230	370	307	29	86	chr2	84632393	84632614	-157560915	-	Charlie2b	DNA	hAT-Charlie	-2573	209	2	2
1754	11939	94	16	7	chr2	153262366	153264959	-88928570	+	L1PA10	LINE	L1	3559	6165	-3	2
2390	252	362	49	0	chr2	236665923	236666039	-5527490	-	MIRb	SINE	MIR	-61	207	86	2
2419	15	147	0	70	chr2	240450976	240451019	-1742510	+	G-rich	Low_complexity	Low_complexity	1	43	0	2
619	64	165	8	8	chr5	4574422	4574546	-176963713	+	(ACCACC)n	Simple_repeat	Simple_repeat	1	125	0	3
1249	23579	72	6	4	chr5	87049829	87051798	-94486461	-	HERVL-int	LTR	ERVL	-1212	4442	2465	3
1926	426	279	68	191	chr5	175888181	175888469	-5649790	+	MIRb	SINE	MIR	10	259	-9	3
627	13	98	0	0	chr6	5609562	5609584	-165196395	+	(ACC)n	Simple_repeat	Simple_repeat	1	22	0	3
1147	2308	111	16	0	chr6	73703903	73704201	-97101778	+	AluSx1	SINE	Alu	2	304	-8	3
1153	33343	84	6	1	chr6	74555532	74559893	-96246086	-	HERVL-int	LTR	ERVL	-1272	4382	1	3
1860	1671	301	125	28	chr6	167200787	167201724	-3604255	+	L2a	LINE	L2	1819	2859	-560	3
1305	1145	261	12	29	chr8	94418464	94418811	-50719825	-	L1ME1	LINE	L1	-28	6151	5811	3
1294	248	143	39	0	chr9	93060283	93060332	-45334385	+	MIR1_Amn	SINE	MIR	91	141	-89	4
791	1514	214	47	72	chr16	27075161	27075645	-63262700	+	MLT1H	LTR	ERVL-MaLR	77	547	-2	1
791	186	325	167	44	chr16	27075648	27075727	-63262618	+	L2a	LINE	L2	2847	2933	-486	1
791	2810	151	29	0	chr16	27075727	27076171	-63262174	+	MSTB2	LTR	ERVL-MaLR	1	457	0	1
800	675	294	41	13	chr16	28219348	28219586	-62118759	-	LTR33	LTR	ERVL	-268	247	3	1
800	1855	127	4	0	chr16	28219630	28219883	-62118462	+	AluSx	SINE	Alu	52	305	-7	1
830	184	288	43	15	chr19	32183636	32183703	-26433913	-	X6B_LINE	LINE	CR1	-884	188	120	1
736	11018	199	57	25	chrY	19893684	19898765	-37328650	+	L1PA5	LINE	L1	975	6338	-1	4
736	11018	199	57	25	chrY	19893684	19898765	-37328650	+	L1PA5	LINE	L1	975	6338	-1	4
1848	431	159	0	47	chr2	165665041	165665127	-76528402	-	L3	LINE	CR1	-872	3227	3146	2
2403	547	236	12	41	chr2	238300152	238300302	-3893227	-	MER63B	DNA	hAT-Blackjack	0	436	293	2
690	345	313	88	88	chr3	13859518	13859735	-184435824	+	L2a	LINE	L2	3210	3426	0	2
598	2187	278	46	2	chr5	1769580	1770221	-179768038	+	L1MB5	LINE	L1	5504	6174	0	3
1379	1285	277	95	30	chr7	104201018	104201479	-55144494	+	LTR33	LTR	ERVL	1	494	-21	3
748	590	271	21	24	chr8	21478387	21478596	-123660040	-	MIRc	SINE	MIR	-51	217	5	3
618	2256	96	10	26	chr9	4436523	4436836	-133957881	+	AluSx1	SINE	Alu	1	308	-4	4
670	5735	114	3	31	chr9	11244816	11245709	-127149008	-	L1PA11	LINE	L1	-5	6169	5302	4
1301	209	247	189	0	chr9	93916679	93916752	-44477965	+	MIR	SINE	MIR	56	145	-117	4
1446	625	255	14	7	chr10	112854308	112854446	-20942976	-	MIRb	SINE	MIR	-113	155	17	5
1446	291	255	75	15	chr10	112854519	112854655	-20942767	+	MIRc	SINE	MIR	21	170	-98	5
1531	721	219	65	17	chr10	124031690	124031929	-9765493	-	MIR	SINE	MIR	0	268	22	5
936	4155	237	92	17	chr11	46096148	46097494	-88989128	+	L2a	LINE	L2	1647	3119	-307	6
1026	1018	293	134	24	chr1	57921479	57922273	-191034149	+	L2a	LINE	L2	2495	3395	-31	1
1896	1867	176	3	13	chr1	171888976	171889278	-77067144	-	AluJb	SINE	Alu	-13	299	1	2
1073	2310	117	7	0	chr2	63978610	63978919	-178214610	-	AluSx	SINE	Alu	-1	311	1	2
1073	4253	247	81	8	chr2	63978919	63979228	-178214301	-	L1MEc	LINE	L1	-2691	3628	3261	2
1079	2292	106	0	7	chr2	64804341	64804642	-177388887	-	AluSx	SINE	Alu	-13	299	1	2
1079	2538	226	102	18	chr2	64804642	64805207	-177388322	-	Kanga2_a	DNA	TcMar-Tc2	-244	644	17	2
1210	360	392	52	21	chr2	81932801	81933268	-160260261	+	L2a	LINE	L2	2940	3421	-5	2
1995	5235	188	50	12	chr2	184918956	184919833	-57273696	-	ERVL-B4-int	LTR	ERVL	-1096	4618	3702	2
2091	767	187	47	0	chr2	197524652	197524775	-44668754	-	AluJo	SINE	Alu	-180	132	4	2
2091	1348	173	38	0	chr2	197524777	197524979	-44668550	-	AluJb	SINE	Alu	-19	293	84	2
632	2028	172	0	0	chr3	6232171	6232479	-192063080	-	AluSz	SINE	Alu	-4	308	1	2
632	357	350	112	97	chr3	6232479	6232899	-192062660	+	MamGypLTR3	LTR	Gypsy	287	698	-196	2
978	1436	144	5	0	chr3	51586208	51586416	-146709143	-	AluJo	SINE	Alu	-102	210	2	2
2057	2453	70	7	7	chr3	192983284	192983585	-5311974	-	AluSq	SINE	Alu	-12	301	1	2
728	1795	133	85	4	chr4	18849044	18849314	-171365241	-	AluSc	SINE	Alu	-15	294	1	2
605	1953	176	0	3	chr5	2688119	2688432	-178849827	-	AluSz	SINE	Alu	0	312	1	3
663	2011	119	0	48	chr5	10322090	10322401	-171215858	-	AluSx	SINE	Alu	-16	296	1	3
664	1982	132	29	20	chr5	10368569	10368872	-171169387	-	AluSz	SINE	Alu	-6	306	1	3
664	1716	139	13	90	chr5	10368872	10368975	-171169284	+	AluJo	SINE	Alu	214	298	-14	3
1929	1642	176	17	10	chr5	176177148	176177437	-5360822	-	AluJb	SINE	Alu	-21	291	1	3
843	187	286	54	41	chr6	33935237	33935310	-136870669	+	MIRc	SINE	MIR	50	123	-145	3
1873	2136	123	3	0	chr6	168831527	168831835	-1974144	-	AluSq2	SINE	Alu	0	313	5	3
1877	398	260	123	50	chr6	169421930	169422259	-1383720	+	L2a	LINE	L2	2791	3143	-283	3
821	2189	141	3	0	chr8	30955528	30955819	-114182817	-	AluJr4	SINE	Alu	-20	292	1	3
1309	500	189	0	2	chr8	94970885	94970991	-50167645	-	FLAM_C	SINE	Alu	-90	212	8	3
1309	1899	174	10	23	chr8	95013091	95013401	-50125235	-	AluJr	SINE	Alu	-2	310	5	3
1369	1590	136	34	118	chr8	102847570	102847893	-42290743	-	AluJr	SINE	Alu	-16	296	2	3
628	2418	79	0	13	chr9	5655865	5656169	-132738548	-	AluY	SINE	Alu	-11	300	1	4
628	3839	157	53	66	chr9	5656169	5656401	-132738316	-	L1MC	LINE	L1	-2446	3700	3459	4
702	1968	130	7	0	chr9	15368076	15368381	-123026336	-	AluSx4	SINE	Alu	0	310	3	4
702	2020	141	0	52	chr9	15368381	15368519	-123026198	-	AluSx	SINE	Alu	-176	136	1	4
1300	2015	179	0	7	chr9	93724020	93724321	-44670396	-	AluJr	SINE	Alu	-12	300	2	4
1314	707	315	41	23	chr9	95620588	95620851	-42773866	+	Charlie2b	DNA	hAT-Charlie	404	671	-2111	4
1314	240	122	0	24	chr9	95620921	95620963	-42773754	+	Tigger1	DNA	TcMar-Tigger	9	49	-2369	4
1314	15187	117	30	19	chr9	95620963	95621180	-42773537	+	Tigger1	DNA	TcMar-Tigger	26	251	-2167	4
1199	2285	95	0	7	chr10	80552922	80553216	-53244206	-	AluSq2	SINE	Alu	-20	293	2	4
1436	1022	126	0	0	chr10	111591717	111591852	-22205570	-	AluSz6	SINE	Alu	-176	136	2	5
1436	1757	183	20	0	chr10	111591852	111592196	-22205226	-	ERVL-B4-int	LTR	ERVL	-5363	351	1	5
1458	2222	113	14	0	chr10	114448630	114448905	-19348517	-	AluSx	SINE	Alu	-29	283	5	5
1464	2476	85	7	0	chr10	115288515	115288821	-18508601	-	AluSx	SINE	Alu	-4	308	1	5
1464	14685	176	28	37	chr10	115288821	115288970	-18508452	-	L1MA5A	LINE	L1	-780	6782	6638	5
1532	573	236	136	27	chr10	124177195	124177378	-9620044	-	MIRb	SINE	MIR	-14	254	49	5
1474	1920	120	3	14	chr11	116587856	116588172	-18498450	-	AluSx3	SINE	Alu	0	311	1	7
1474	771	316	107	37	chr11	116588172	116588492	-18498130	-	MLT1L	LTR	ERVL-MaLR	-166	444	92	7
1498	229	339	105	38	chr11	119781758	119782049	-15304573	+	L2b	LINE	L2	3063	3375	0	7
1502	1725	180	0	21	chr11	120250989	120251272	-14835350	-	AluJr4	SINE	Alu	-34	278	2	7
1508	2413	84	0	0	chr11	121085049	121085336	-14001286	-	AluSx3	SINE	Alu	-23	288	2	7
1524	2137	118	0	7	chr11	123138664	123138953	-11947669	-	AluSx	SINE	Alu	-23	289	3	7
1524	1252	224	30	52	chr11	123138953	123139215	-11947407	+	MER58B	DNA	hAT-Charlie	86	341	0	7
1613	2130	113	0	7	chr11	134796175	134796459	-290163	-	AluSx1	SINE	Alu	-30	282	1	7
1613	1463	224	23	42	chr11	134796459	134796702	-289920	+	Tigger3a	DNA	TcMar-Tigger	104	348	0	7
1029	740	182	69	80	chr14	58317618	58317794	-48725924	-	AluJb	SINE	Alu	0	312	139	1
1040	2083	116	7	0	chr14	59748809	59749085	-47294633	-	AluSz6	SINE	Alu	-32	280	3	1
1040	928	108	50	1	chr14	59749087	59750710	-47293008	+	(AT)n	Simple_repeat	Simple_repeat	1	1704	0	1
776	1932	125	45	0	chr15	25047502	25047781	-76943408	-	AluSz	SINE	Alu	-20	292	1	1
776	3945	152	134	12	chr15	25047781	25047980	-76943209	-	L1PA15	LINE	L1	-730	5435	5219	1
798	669	238	60	5	chr15	27983990	27984180	-74007009	-	L1MA4	LINE	L1	-14	6286	6086	1
1294	1795	177	10	16	chr15	92933600	92933905	-9057284	-	AluJo	SINE	Alu	-9	303	1	1
1305	1766	163	60	0	chr15	94447394	94447676	-7543513	-	AluSz6	SINE	Alu	-12	300	1	1
768	1787	169	0	52	chr16	24018198	24018349	-66319996	-	AluJr	SINE	Alu	-171	141	2	1
768	545	322	51	5	chr16	24018351	24018557	-66319788	-	MIR	SINE	MIR	-10	252	37	1
777	2236	110	0	0	chr16	25173912	25174211	-65164134	-	AluSx	SINE	Alu	-13	299	1	1
810	2573	88	13	3	chr16	29524574	29524882	-60813463	-	AluSc8	SINE	Alu	0	311	1	1
810	1422	111	7	242	chr16	29524882	29525109	-60813236	-	AluSz6	SINE	Alu	-179	133	1	1
815	2425	88	13	3	chr16	30264558	30264866	-60073479	-	AluSc8	SINE	Alu	0	311	1	1
815	1279	111	7	242	chr16	30264866	30265093	-60073252	-	AluSz6	SINE	Alu	-179	133	1	1
827	2225	111	36	0	chr16	31783829	31784127	-58554218	-	AluSx	SINE	Alu	-3	309	1	1
827	1528	204	36	0	chr16	31784127	31784470	-58553875	-	L1PB4	LINE	L1	-28	6128	5773	1
1240	1833	144	24	34	chr16	85943107	85943405	-4394940	-	AluJr	SINE	Alu	-6	306	12	1
1240	729	305	17	121	chr16	85943405	85943580	-4394765	+	L2b	LINE	L2	3219	3375	0	1
606	2256	92	10	7	chr17	2786946	2787249	-80470192	-	AluSz	SINE	Alu	-7	305	2	1
606	1736	183	33	3	chr17	2787254	2787549	-80469892	-	AluJr	SINE	Alu	-2	310	7	1
856	1904	167	0	3	chr17	35604107	35604407	-47653034	-	AluJb	SINE	Alu	-12	300	2	1
856	18	139	24	0	chr17	35604407	35604438	-47653003	+	(TTTTTG)n	Simple_repeat	Simple_repeat	4	35	0	1
872	933	180	45	0	chr17	37665731	37665881	-45591560	-	FRAM	SINE	Alu	-19	157	1	1
872	211	211	14	90	chr17	37665888	37665966	-45591475	-	UCON132b	DNA	hAT-Tip100	-76	72	1	1
924	1744	128	24	44	chr17	44526293	44526590	-38730851	-	AluSx1	SINE	Alu	-21	291	1	1
924	1290	229	118	29	chr17	44526590	44526723	-38730718	+	L1MEd	LINE	L1	1356	1523	-5563	1
1031	1251	140	10	234	chr17	58464937	58465322	-24792119	-	AluJr	SINE	Alu	-14	298	1	1
635	1920	281	111	33	chr18	6600504	6601448	-73771837	-	L2a	LINE	L2	-721	2698	1672	1
690	2402	86	0	13	chr18	13829966	13830270	-66543015	-	AluY	SINE	Alu	-11	300	1	1
690	1253	168	0	28	chr18	13830270	13830355	-66542930	+	MER3	DNA	hAT-Charlie	130	209	0	1
694	2068	133	0	13	chr19	14300800	14301101	-44316515	-	AluSx	SINE	Alu	-14	298	2	1
694	1742	182	20	0	chr19	14301101	14301397	-44316219	-	AluJb	SINE	Alu	-10	302	1	1
843	1875	138	0	86	chr19	33864252	33864408	-24753208	-	AluSx1	SINE	Alu	-179	133	1	1
754	390	238	12	0	chr22	22239407	22239491	-28578977	-	AluJb	SINE	Alu	-227	85	1	2
1427	1530	206	44	3	chrX	110368018	110368140	-45672755	-	AluJr	SINE	Alu	-191	121	1	4
1427	1711	255	125	19	chrX	110368140	110368807	-45672088	+	L2a	LINE	L2	2639	3407	-19	4
1897	6555	172	83	65	chr1	172019245	172020444	-76935978	-	L1MC1	LINE	L1	-4863	1645	471	2
1048	897	256	42	20	chr2	60693822	60694077	-181499452	-	MIR	SINE	MIR	0	262	2	2
1362	654	312	129	20	chr2	101945733	101945959	-140247570	+	L2	LINE	L2	1191	1434	-1985	2
2376	378	238	149	16	chr2	234788801	234788929	-7404600	+	MER102a	DNA	hAT-Charlie	73	220	-110	2
680	12	115	33	32	chr3	12580438	12580468	-185715091	+	(CCCCA)n	Simple_repeat	Simple_repeat	1	31	0	2
680	2169	104	0	21	chr3	12580469	12580758	-185714801	-	AluSx1	SINE	Alu	-29	283	1	2
695	759	238	41	5	chr3	14490139	14490325	-183805234	+	MIR	SINE	MIR	33	225	-37	2
2085	1850	174	0	0	chr3	196714182	196714463	-1581096	+	AluJr	SINE	Alu	2	282	-30	2
595	16	189	0	0	chr5	1346647	1346683	-180191576	+	(CTCC)n	Simple_repeat	Simple_repeat	1	36	0	3
743	343	231	0	55	chr6	20810707	20810817	-149995162	-	L1MC5	LINE	L1	-235	9069	8966	3
1866	2063	142	21	0	chr6	167985328	167985660	-2820319	+	MER1B	DNA	hAT-Charlie	1	339	0	3
1326	352	129	61	0	chr9	97140648	97140710	-41254007	-	MSTA-int	LTR	ERVL-MaLR	-616	1015	950	4
1326	510	158	21	0	chr9	97140802	97140897	-41253820	-	MSTA	LTR	ERVL-MaLR	-331	97	1	4
1620	804	233	15	20	chr9	135728920	135729117	-2665600	+	MLT1B	LTR	ERVL-MaLR	1	196	-194	4
1508	2462	88	0	0	chr10	121090341	121090648	-12706774	+	AluSc	SINE	Alu	1	307	-2	5
1478	528	261	134	30	chr11	117053405	117053665	-18032957	-	MIR	SINE	MIR	0	268	2	7
1478	1964	139	28	0	chr11	117053671	117053945	-18032677	-	AluJo	SINE	Alu	-29	283	2	7
1184	210	290	41	60	chr15	78541704	78541806	-23449383	+	L2c	LINE	L2	3266	3391	-35	1
698	2461	231	68	87	chr16	14842539	14842921	-75495424	-	L1ME3A	LINE	L1	-7	6166	5771	1
708	2601	229	65	82	chr16	16241027	16241409	-74096936	-	L1ME3A	LINE	L1	-7	6166	5777	1
983	385	321	93	63	chr16	52183366	52183543	-38154802	-	MIR	SINE	MIR	-62	200	16	1
983	800	221	51	73	chr16	52183545	52183765	-38154580	+	MER20	DNA	hAT-Charlie	4	218	-1	1
847	967	173	84	48	chr17	34420053	34420260	-48837181	-	MER20	DNA	hAT-Charlie	-4	215	1	1
1028	5790	156	31	19	chr17	58075254	58077143	-25180298	+	L1MB7	LINE	L1	4260	6172	-12	1
641	4557	68	18	2	chrX	7422063	7422670	-148618225	-	L1PA10	LINE	L1	-4	6164	5548	4
717	734	361	64	42	chrX	17416136	17416762	-138624133	+	L2c	LINE	L2	2743	3384	-3	4
1051	2568	231	68	35	chr2	61094125	61094630	-181098899	-	L1ME1	LINE	L1	-2	6177	5647	2
1387	206	231	172	0	chr2	105204454	105204531	-136988998	+	MIRc	SINE	MIR	29	124	-138	2
2086	1793	172	3	23	chr2	196814965	196815268	-45378261	-	AluJb	SINE	Alu	-15	297	1	2
2131	4238	104	40	34	chr2	202678108	202678563	-39514966	-	LTR9B	LTR	ERV1	0	644	187	2
2138	2018	157	0	0	chr2	203639857	203640151	-38553378	-	AluJb	SINE	Alu	-18	294	1	2
2361	1045	185	67	0	chr2	232800572	232800767	-9392762	-	AluJr	SINE	Alu	0	312	104	2
2386	1539	218	10	7	chr2	236121961	236122250	-6071279	-	AluJr4	SINE	Alu	-22	290	1	2
599	1617	165	34	59	chr3	1835972	1836275	-196459284	-	AluJb	SINE	Alu	-16	296	2	2
719	1477	180	59	4	chr4	17585435	17585707	-172628848	-	AluJo	SINE	Alu	-11	301	14	2
719	396	309	109	39	chr4	17634083	17634330	-172580225	-	MER46C	DNA	TcMar-Tigger	-3	335	66	2
610	3345	187	43	21	chr5	3366551	3366843	-178171416	-	L1MA6	LINE	L1	-237	7482	7179	3
1651	2092	120	17	0	chr5	139783941	139784233	-41754026	-	AluJb	SINE	Alu	-9	303	7	3
1858	1696	182	20	32	chr6	166865278	166865586	-3940393	-	AluJb	SINE	Alu	-8	304	1	3
1145	1623	141	3	127	chr7	73414903	73415243	-85930730	-	AluJo	SINE	Alu	-14	298	1	3
1152	849	165	0	15	chr7	74367491	74367624	-84978349	-	AluJo	SINE	Alu	-180	132	2	3
1152	236	183	167	0	chr7	74367624	74367684	-84978289	-	MLT1C	LTR	ERVL-MaLR	-390	77	6	3
1095	1160	114	18	69	chr8	66965437	66965612	-78173024	-	AluJr	SINE	Alu	-10	302	137	3
1095	929	209	37	135	chr8	66965612	66965638	-78172998	-	L1ME1	LINE	L1	-577	5602	5586	3
1306	2407	98	3	0	chr8	94621788	94622095	-50516541	+	AluSp	SINE	Alu	1	308	-5	3
1306	618	201	0	76	chr8	94622095	94622208	-50516428	-	FLAM_C	SINE	Alu	-37	106	1	3
1306	2236	117	0	0	chr8	94622221	94622520	-50516116	-	AluSx1	SINE	Alu	-13	299	1	3
1244	1547	198	0	25	chr10	86414035	86414318	-47383104	-	AluJr	SINE	Alu	-36	276	1	4
1244	312	295	11	94	chr10	86414343	86414534	-47382888	-	HAL1	LINE	L1	0	2507	2333	4
1499	2052	149	7	3	chr10	119925553	119925841	-13871581	-	AluJr	SINE	Alu	-23	289	1	5
1595	149	226	6	11	chr10	132450154	132450506	-1346916	+	(CCCACC)n	Simple_repeat	Simple_repeat	1	354	0	5
1474	1587	132	52	45	chr11	116545954	116546219	-18540403	-	AluJb	SINE	Alu	-25	287	21	7
1524	2061	155	0	0	chr11	123164298	123164602	-11922020	-	AluSx	SINE	Alu	-7	305	2	7
1089	1972	115	4	18	chr12	66106811	66107090	-67168219	-	AluSq2	SINE	Alu	-9	304	30	8
781	1523	167	14	77	chr15	25753793	25754093	-76237096	-	AluJr4	SINE	Alu	-25	287	7	1
802	739	220	0	34	chr16	28480218	28480381	-61857964	-	AluJb	SINE	Alu	-90	211	1	1
802	1202	240	41	31	chr16	28480355	28480406	-61857939	-	LTR106_Mam	LTR	LTR	-236	472	419	1
882	2207	120	0	7	chr17	38984314	38984615	-44272826	-	AluSx1	SINE	Alu	-9	303	5	1
1006	566	314	78	18	chr17	55191025	55191248	-28066193	-	MIRc	SINE	MIR	-14	254	26	1
1028	948	185	0	0	chr17	58128110	58128256	-25129185	-	AluJr	SINE	Alu	-31	281	136	1
1028	1404	275	115	44	chr17	58128256	58129081	-25128360	-	HAL1	LINE	L1	-955	1552	661	1
645	1974	172	3	10	chr18	7889324	7889637	-72483648	-	AluJr	SINE	Alu	0	312	2	1
689	982	145	0	0	chr18	13717311	13717442	-66655843	-	FLAM_C	SINE	Alu	-12	131	1	1
636	67	246	22	11	chr6	6800402	6800587	-164005392	+	(TC)n	Simple_repeat	Simple_repeat	1	189	0	3
813	768	245	78	37	chr8	29969891	29970122	-115168514	+	MIR	SINE	MIR	19	262	0	3
1201	22	227	0	0	chr15	80836073	80836119	-21155070	+	(T)n	Simple_repeat	Simple_repeat	1	46	0	1
797	208	246	10	8	chr16	27827803	27828303	-62510042	+	(ATCC)n	Simple_repeat	Simple_repeat	1	505	0	1
691	1181	285	75	2	chr18	14018552	14019013	-66354272	+	Charlie25	DNA	hAT-Charlie	1324	1820	-704	1
1071	1099	157	25	4	chr2	63766737	63766968	-178426561	-	L1MB3	LINE	L1	-16	6167	5932	2
1071	3895	243	57	55	chr2	63766968	63768513	-178425016	-	L1ME1	LINE	L1	-153	6026	4521	2
1362	319	326	27	11	chr2	101967413	101967593	-140225936	-	Charlie23a	DNA	hAT-Charlie	-108	231	49	2
684	252	306	116	45	chr3	13043479	13043750	-185251809	+	L2a	LINE	L2	3107	3386	-1	2
736	21806	112	37	8	chr4	19887556	19893979	-170320576	+	HERVH48-int	LTR	ERV1	3	6654	0	2
1666	356	323	30	12	chr5	141789131	141789294	-39748965	+	L2b	LINE	L2	2736	2901	-518	3
842	232	329	41	60	chr6	33767696	33767845	-137038134	-	MIR3	SINE	MIR	-48	160	15	3
1824	1832	177	26	0	chr6	162409154	162409454	-8396525	-	AluJr	SINE	Alu	-2	310	3	3
1824	368	105	0	0	chr6	162409521	162409578	-8396401	-	MADE2	DNA	TcMar-Mariner	-3	77	21	3
1859	3460	131	52	0	chr6	166986044	166986571	-3819408	-	MER21A	LTR	ERVL	0	931	376	3
1361	13	264	32	31	chr7	101734060	101734132	-57611841	+	(GCCCCCC)n	Simple_repeat	Simple_repeat	1	72	0	3
1370	19732	102	24	14	chr7	102974408	102977040	-56368933	+	HERVH48-int	LTR	ERV1	485	3158	-3496	3
1087	41249	102	35	7	chr8	65863621	65870079	-79268557	+	HERVH48-int	LTR	ERV1	1	6647	-7	3
678	1602	266	5	19	chr9	12235109	12235519	-126159198	-	MER92A	LTR	ERV1	-8	404	1	4
700	25	59	0	0	chr9	15145603	15145639	-123249078	+	(CACCCC)n	Simple_repeat	Simple_repeat	1	36	0	4
1306	5722	208	136	65	chr9	94553918	94554775	-43839942	-	REP522	Satellite	telo	-148	917	1	4
1623	18	69	32	0	chr9	136159045	136159076	-2235641	+	(TTGA)n	Simple_repeat	Simple_repeat	1	32	0	4
1381	452	300	95	50	chr10	104334781	104335121	-29462301	+	MamRep605	LTR?	LTR?	440	796	-53	5
1388	357	314	83	50	chr10	105354994	105355215	-28442207	+	L2a	LINE	L2	2747	2975	-444	5
1402	1493	313	68	58	chr10	107192007	107192855	-26604567	+	LTR78	LTR	ERV1	448	1304	0	5
1432	12	140	128	0	chr10	111082281	111082328	-22715094	+	(CTCCTCA)n	Simple_repeat	Simple_repeat	1	53	0	5
1524	538	300	89	23	chr10	123109399	123109662	-10687760	-	MamRep137	DNA	TcMar-Tigger	-101	409	128	5
999	683	247	0	110	chr14	54364360	54364560	-52679158	-	MER8	DNA	TcMar-Tigger	0	239	62	1
765	250	251	103	37	chr16	23669942	23670095	-66668250	+	L2c	LINE	L2	3193	3384	-42	1
766	529	148	72	112	chr16	23753114	23753196	-66585149	-	MER106B	DNA	hAT-Charlie	-4	1055	978	1
766	2406	87	3	0	chr16	23753196	23753505	-66584840	-	AluSp	SINE	Alu	-3	310	1	1
770	433	257	9	9	chr16	24322012	24322122	-66016223	-	MIR	SINE	MIR	-114	148	39	1
721	220	316	95	0	chr17	17878378	17878454	-65378987	+	L2c	LINE	L2	3258	3341	-46	1
833	1267	148	20	43	chr17	32557490	32557699	-50699742	-	AluJb	SINE	Alu	-5	307	104	1
846	399	215	58	139	chr17	34220498	34220649	-49036792	-	MER5A1	DNA	hAT-Charlie	-16	150	13	1
854	16895	88	55	7	chr17	35298423	35300398	-47957043	+	LTR19-int	LTR	ERV1	330	2368	-3218	1
880	14	0	35	67	chr17	38671646	38671675	-44585766	+	(CCCAC)n	Simple_repeat	Simple_repeat	1	30	0	1
1029	2989	228	47	29	chr17	58255678	58256404	-25001037	-	L1MD2	LINE	L1	-21	6338	5599	1
646	953	149	13	25	chrX	8120686	8120847	-147920048	-	AluJb	SINE	Alu	-10	302	144	4
2422	12	120	0	65	chr2	240887435	240887466	-1306063	+	(CCACC)n	Simple_repeat	Simple_repeat	1	31	0	2
608	609	178	8	0	chr3	3119407	3119525	-195176034	+	MLT1D	LTR	ERVL-MaLR	387	505	0	2
1172	2477	183	91	43	chr18	76946871	76947449	-3425836	-	L1MB8	LINE	L1	-17	6161	5554	1
1039	12	204	0	28	chr1	59511227	59511263	-189445159	+	(CCCCAC)n	Simple_repeat	Simple_repeat	1	36	0	1
1348	2134	115	47	24	chr2	100072121	100072452	-142121077	+	MER1B	DNA	hAT-Charlie	1	339	0	2
1775	863	362	15	29	chr2	155979663	155980073	-86213456	+	L1M1	LINE	L1	1542	1945	-5541	2
688	776	264	173	14	chr3	13576737	13576940	-184718619	-	L2a	LINE	L2	0	3426	3216	2
974	6689	92	12	4	chr3	51019460	51021188	-147274371	-	L1PA11	LINE	L1	-1	6173	4433	2
1208	1064	264	122	17	chr4	81736315	81736782	-108477773	-	LTR33A_	LTR	ERVL	-2	529	7	2
745	6488	147	2	28	chr6	21058720	21059756	-149746223	-	L1PA10	LINE	L1	-5341	1012	4	3
668	668	294	67	80	chr8	10914854	10915294	-134223342	+	L2a	LINE	L2	2993	3426	0	3
1091	13	200	85	16	chr8	66345059	66345118	-78793518	+	(ACCTCAG)n	Simple_repeat	Simple_repeat	1	64	0	3
1299	20	67	0	29	chr8	93597604	93597640	-51540996	+	(AAAG)n	Simple_repeat	Simple_repeat	1	34	0	3
1299	250	286	25	25	chr8	93597654	93597733	-51540903	+	MER5A	DNA	hAT-Charlie	80	158	-31	3
1308	583	333	33	0	chr9	94779136	94779343	-43615374	-	L1M6	LINE	L1	-5791	705	492	4
1308	1310	283	51	65	chr9	94779422	94779962	-43614755	-	Charlie29a	DNA	hAT-Charlie	0	719	188	4
1504	529	288	94	14	chr10	120488807	120489022	-13308400	+	MIRb	SINE	MIR	20	253	-15	5
1536	11	316	19	65	chr10	124713051	124713157	-9084265	+	(CCCCAT)n	Simple_repeat	Simple_repeat	1	108	0	5
1536	596	274	46	26	chr10	124713170	124713361	-9084061	-	MIRc	SINE	MIR	-65	203	9	5
1500	314	203	30	0	chr11	119935800	119935864	-15150758	-	L2b	LINE	L2	0	3375	3310	7
1541	27	87	0	0	chr11	125330682	125330719	-9755903	+	(CA)n	Simple_repeat	Simple_repeat	1	37	0	7
1090	2125	166	3	82	chr12	66260612	66260979	-67014330	+	MER1B	DNA	hAT-Charlie	2	339	0	8
1090	354	321	31	114	chr12	66260979	66261136	-67014173	+	L2c	LINE	L2	3038	3197	-190	8
1096	268	337	66	29	chr12	67027824	67027998	-66247311	-	L2a	LINE	L2	-530	2889	2709	8
1036	2350	103	3	0	chr14	59142965	59143267	-47900451	+	AluSp	SINE	Alu	1	303	-10	1
1147	800	288	131	18	chr15	73701171	73701679	-28289510	+	L2a	LINE	L2	2592	3174	-252	1
1228	246	287	47	65	chr16	84352377	84352530	-5985815	+	MLT1N2	LTR	ERVL-MaLR	412	561	-1	1
942	2448	83	0	0	chr17	46835208	46835510	-36421931	-	AluY	SINE	Alu	-9	302	1	1
684	2321	107	7	0	chr19	13004817	13005116	-45612500	-	AluSz6	SINE	Alu	-11	301	1	1
716	1500	290	124	14	chr19	17260628	17261289	-41356327	+	L2	LINE	L2	2299	3042	-377	1
635	2892	145	49	21	chrX	6618990	6619463	-149421432	+	LTR45B	LTR	ERV1	3	489	0	4
683	7889	176	81	14	chrY	12923114	12925804	-44301611	-	HUERS-P2-int	LTR	ERV1	0	3088	213	4
1009	1266	156	0	5	chr1	55675055	55675261	-193281161	-	L1PB3	LINE	L1	-3	6151	5947	1
1029	17	93	0	75	chr1	58247770	58247810	-190708612	+	(CCCCAC)n	Simple_repeat	Simple_repeat	1	40	0	1
1043	4013	165	51	22	chr2	60082899	60083674	-182109855	+	L1MC3	LINE	L1	6704	7502	-283	2
1229	319	328	136	49	chr2	84428021	84428427	-157765102	+	L2c	LINE	L2	2910	3382	-44	2
1356	835	229	178	84	chr2	101108411	101108864	-141084665	-	MLT1D	LTR	ERVL-MaLR	0	505	1	2
1374	6348	177	88	23	chr2	103532186	103534617	-138658912	-	L1PB3	LINE	L1	-7	6863	4231	2
1442	1934	156	19	43	chr2	112358201	112358624	-129834905	-	L1MC2	LINE	L1	0	6762	6350	2
1531	18285	148	28	19	chr2	124068012	124074495	-118119034	+	L1MA2	LINE	L1	594	8299	0	2
2133	4152	113	40	9	chr2	202998087	202998721	-39194808	-	L1PA16	LINE	L1	-11	6155	5499	2
2138	737	182	0	0	chr2	203627852	203627978	-38565551	-	AluJo	SINE	Alu	-13	299	174	2
693	1836	113	39	4	chr3	14276982	14277258	-184018301	-	L1PB3	LINE	L1	-2	6152	5867	2
629	233	273	83	10	chr5	5880650	5880750	-175657509	+	L2a	LINE	L2	3151	3258	-168	3
636	6672	167	19	8	chr5	6695945	6698027	-174840232	-	L1PB3	LINE	L1	-1	6153	4118	3
640	2055	130	19	16	chr5	7277166	7277451	-174260808	-	AluSz	SINE	Alu	-22	290	1	3
671	892	148	32	52	chr5	11300563	11300756	-170237503	+	MER53	DNA	hAT	5	193	0	3
1657	1792	60	4	0	chr5	140618491	140618724	-40919535	-	L1PA14	LINE	L1	0	6161	5928	3
1158	213	266	163	26	chr6	75214299	75214415	-95591564	-	MIRb	SINE	MIR	-130	138	4	3
1158	2325	108	0	0	chr6	75214453	75214750	-95591229	-	AluSz	SINE	Alu	-15	297	1	3
1160	1147	137	0	12	chr7	75404430	75404598	-83941375	+	AluJb	SINE	Alu	140	305	-7	3
1085	400	313	131	82	chr8	65587218	65587534	-79551102	-	LTR78B	LTR	ERV1	-936	360	25	3
1319	697	228	243	56	chr8	96224118	96224531	-48914105	-	LTR33	LTR	ERVL	0	515	1	3
658	5229	218	44	13	chr9	9696143	9698956	-128695761	-	L1MA2	LINE	L1	-3335	4227	1323	4
1293	294	196	18	0	chr9	92889233	92889289	-45505428	-	THE1D-int	LTR	ERVL-MaLR	-616	1015	959	4
1293	389	223	10	19	chr9	92889378	92889483	-45505234	-	MSTA	LTR	ERVL-MaLR	-324	104	1	4
1326	250	214	18	0	chr9	97146845	97146901	-41247816	-	MSTA-int	LTR	ERVL-MaLR	-616	1015	959	4
1326	440	192	17	25	chr9	97146989	97147102	-41247615	-	MSTA	LTR	ERVL-MaLR	-345	112	4	4
1232	2305	288	83	85	chr10	84851923	84852543	-48944879	+	L2a	LINE	L2	2809	3418	-8	4
1393	5109	240	155	9	chr10	105989342	105990911	-27806511	+	L1MA4A	LINE	L1	1	1840	-5369	5
1550	237	340	20	0	chr10	126597975	126598072	-7199350	-	CR1-3_Croc	LINE	CR1	-1592	2013	1915	5
1513	12	228	57	18	chr11	121723232	121723285	-13363337	+	(TCCCTC)n	Simple_repeat	Simple_repeat	1	56	0	7
1607	341	347	11	75	chr11	134025946	134026133	-1060489	+	MIRb	SINE	MIR	70	244	-24	7
1094	279	267	202	14	chr12	66769252	66769400	-66505909	+	MER5A	DNA	hAT-Charlie	7	189	0	8
1027	636	228	61	53	chr14	58022497	58022724	-49020994	+	LTR16C	LTR	ERVL	261	489	0	1
822	3918	155	32	42	chr15	31156221	31156830	-70834359	+	MER4E1	LTR	ERV1	169	781	0	1
774	1563	162	70	72	chr16	24813179	24813525	-65524820	-	L1PA17	LINE	L1	-16	6150	5806	1
962	33	0	0	0	chr16	49502790	49502818	-40835527	+	(AC)n	Simple_repeat	Simple_repeat	1	28	0	1
597	2593	61	0	3	chr17	1594575	1594887	-81662554	-	AluYk4	SINE	Alu	0	311	1	1
715	4638	106	23	6	chr17	17121657	17122331	-66135110	-	L1PA13	LINE	L1	0	6163	5478	1
642	518	207	56	29	chr18	7516042	7516181	-72857104	-	L1MA10	LINE	L1	0	6334	6192	1
682	2217	82	0	61	chr18	12780530	12780824	-67592461	-	AluSx1	SINE	Alu	-36	276	1	1
932	753	254	53	72	chr18	45590772	45591022	-34782263	-	MIR	SINE	MIR	0	262	18	1
847	418	123	13	62	chr19	34364893	34364974	-24252642	-	AluJo	SINE	Alu	-60	252	176	1
835	1433	144	100	59	chrX	32787472	32787796	-123253099	-	MER44A	DNA	TcMar-Tigger	0	339	1	4
1333	16	86	75	23	chr1	98048582	98048622	-150907800	+	(CCTCCAC)n	Simple_repeat	Simple_repeat	1	43	0	1
1696	2116	127	0	19	chr1	145733123	145733439	-103222983	-	AluSx	SINE	Alu	-2	310	1	2
1903	8869	32	0	1	chr1	172877606	172879472	-76076950	-	L1PA4	LINE	L1	0	6155	4318	2
1190	1957	49	0	0	chr2	79395241	79395485	-162798044	-	L1PA4	LINE	L1	-1	6154	5911	2
1201	2097	126	45	35	chr2	80796400	80796777	-161396752	+	THE1D	LTR	ERVL-MaLR	1	381	0	2
1847	66	29	0	14	chr2	165452383	165452455	-76741074	+	(TTCC)n	Simple_repeat	Simple_repeat	1	72	0	2
1847	15	122	0	0	chr2	165452473	165452500	-76741029	+	(TTTC)n	Simple_repeat	Simple_repeat	1	27	0	2
1932	16	233	0	0	chr2	176605707	176605742	-65587787	+	(C)n	Simple_repeat	Simple_repeat	1	35	0	2
1932	221	333	71	0	chr2	176605742	176605820	-65587709	-	L3	LINE	CR1	-616	3483	3400	2
2349	1998	242	100	75	chr2	231269678	231270357	-10923172	-	HAL1	LINE	L1	-1277	1188	421	2
2038	15693	175	17	9	chr3	190477742	190479910	-7815649	+	L1MA4	LINE	L1	5536	7715	-4	2
2085	1644	158	45	76	chr3	196615931	196616200	-1679359	-	L1PB4	LINE	L1	-49	6107	5829	2
585	6443	94	4	15	chr4	34228	35031	-190179524	-	L1PA14	LINE	L1	0	6161	5371	2
585	6184	104	6	21	chr5	26732	27319	-181510940	-	L1PA14	LINE	L1	0	6161	5584	3
646	26145	30	2	3	chr5	8084215	8090244	-173448015	-	L1PA3	LINE	L1	0	6155	136	3
596	1977	158	0	3	chr6	1447248	1447551	-169358428	-	AluJb	SINE	Alu	-10	302	1	3
596	3874	116	18	72	chr6	1447551	1447839	-169358140	-	L1PB3	LINE	L1	-125	6029	5779	3
839	15	42	40	0	chr6	33410884	33410909	-137395070	+	(GAGGT)n	Simple_repeat	Simple_repeat	1	26	0	3
839	24	389	0	0	chr6	33410912	33411023	-137394956	+	(CCC)n	Simple_repeat	Simple_repeat	1	111	0	3
839	13	255	0	0	chr6	33411013	33411050	-137394929	+	(CTG)n	Simple_repeat	Simple_repeat	1	37	0	3
1150	1287	60	23	0	chr6	74119440	74119608	-96686371	-	L1PA5	LINE	L1	-2	6152	5981	3
1150	15947	50	6	2	chr6	74119608	74122213	-96683766	+	L1PA5	LINE	L1	3362	5973	-181	3
1870	13	81	39	0	chr6	168532393	168532419	-2273560	+	(TTTTC)n	Simple_repeat	Simple_repeat	1	27	0	3
798	1531	241	97	28	chr8	28025831	28026360	-117112276	-	L1ME4b	LINE	L1	-34	858	290	3
658	7510	30	1	2	chr9	9676132	9677371	-128717346	-	L1PA4	LINE	L1	-7	6148	4911	4
707	2311	170	91	13	chr9	16023848	16024295	-122370422	+	MLT1D	LTR	ERVL-MaLR	21	505	0	4
1437	6196	30	1	6	chr10	111796409	111797188	-22000234	-	L1PA3	LINE	L1	-1	6154	5380	5
22	3379	14	0	0	chr10	112197488	112197850	-21599572	-	L1PA2	LINE	L1	-2	6153	5792	5
1485	1680	45	0	0	chr11	118023356	118023554	-17063068	-	L1PA3	LINE	L1	-3	6152	5955	7
1485	2710	219	80	116	chr11	118023554	118023751	-17062871	+	L1MEc	LINE	L1	1019	1207	-5193	7
1506	13	270	38	0	chr11	120832037	120832090	-14254532	+	(CCTC)n	Simple_repeat	Simple_repeat	1	55	0	7
1536	2139	90	7	7	chr11	124726654	124726931	-10359691	+	AluSx1	SINE	Alu	1	277	-35	7
768	6611	15	1	0	chr15	24103936	24104727	-77886462	-	L1PA3	LINE	L1	-5	6150	5359	1
1203	91	328	15	15	chr15	81105090	81105417	-20885772	+	(TCCC)n	Simple_repeat	Simple_repeat	1	332	0	1
1363	5212	121	221	7	chr15	101979519	101980763	-10426	+	TAR1	Satellite	telo	483	2068	-43	1
1243	1940	208	13	163	chr16	86357655	86358202	-3980143	+	MLT1C	LTR	ERVL-MaLR	4	467	0	1
694	1409	67	49	5	chr17	14319782	14319976	-68937465	-	L1PB1	LINE	L1	0	6151	5949	1
694	306	306	95	67	chr17	14319976	14320002	-68937439	-	L2a	LINE	L2	-268	3158	3134	1
855	3084	92	5	2	chr17	35464264	35464689	-47792752	-	L1PA14	LINE	L1	-1	6160	5735	1
1108	1153	105	0	0	chr17	68666254	68666426	-14591015	-	L1PA14	LINE	L1	-1	6160	5989	1
1108	5880	78	16	0	chr17	68666421	68667206	-14590235	-	L1PA14	LINE	L1	-108	6053	5256	1
626	2174	120	3	43	chr18	5494375	5494701	-74878584	+	AluSq2	SINE	Alu	1	313	0	1
654	28	182	66	0	chr18	9104656	9104732	-71268553	+	(TCCC)n	Simple_repeat	Simple_repeat	1	81	0	1
843	18	218	0	0	chr19	33906211	33906248	-24711368	+	(C)n	Simple_repeat	Simple_repeat	1	37	0	1
1413	1309	258	82	52	chrX	108607395	108607502	-47433393	-	L1MC5a	LINE	L1	-1950	827	734	4
1413	2069	95	0	0	chrX	108607502	108607754	-47433141	-	AluSg	SINE	Alu	-31	279	28	4
779	7176	35	9	6	chrY	25452870	25453920	-31773495	-	L1PA3	LINE	L1	0	6155	5105	4
688	15	266	0	57	chr3	13614321	13614391	-184681168	+	(ACCACCC)n	Simple_repeat	Simple_repeat	1	70	0	2
1376	2539	132	7	0	chr7	103807454	103807854	-55538119	-	L1PA16	LINE	L1	-2	6164	5762	3
1115	3121	91	9	2	chr8	69543224	69543654	-75594982	-	L1PA10	LINE	L1	-12	6156	5724	3
1115	301	320	111	73	chr8	69565785	69566210	-75572426	+	L2c	LINE	L2	2921	3363	-24	3
1347	5103	116	22	1	chr8	99982813	99983632	-45155004	-	L1PA16	LINE	L1	-8	6158	5323	3
1314	3147	164	11	12	chr9	95603850	95604219	-42790498	-	L1PA17	LINE	L1	-16	6150	5781	4
1198	1700	174	64	3	chr10	80418026	80418365	-53379057	-	L1PA17	LINE	L1	0	6166	5806	4
1211	40	243	26	51	chr10	82152754	82152807	-51644615	+	(TCCTTC)n	Simple_repeat	Simple_repeat	1	147	0	4
1211	46	106	61	19	chr10	82152807	82152905	-51644517	+	(CTTT)n	Simple_repeat	Simple_repeat	1	104	0	4
1444	260	352	84	82	chr10	112709418	112709682	-21087740	+	L2c	LINE	L2	2910	3194	-193	5
929	345	310	55	23	chr11	45208487	45208690	-89877932	-	MIRc	SINE	MIR	-51	217	2	6
931	13	227	43	0	chr11	45407535	45407581	-89679041	+	(CCTCC)n	Simple_repeat	Simple_repeat	1	48	0	6
1600	80	225	32	44	chr11	133082353	133082637	-2003985	+	(CCCCCT)n	Simple_repeat	Simple_repeat	1	293	0	7
1600	80	225	32	44	chr11	133082353	133082637	-2003985	+	(CCCCCT)n	Simple_repeat	Simple_repeat	1	293	0	7
1185	541	304	19	19	chr15	78768508	78768719	-23222470	+	MIRb	SINE	MIR	56	266	-2	1
1188	198	373	144	7	chr15	79052531	79052841	-22938348	-	L2c	LINE	L2	-77	3310	2951	1
1188	351	306	62	0	chr15	79052862	79052983	-22938206	+	Charlie15a	DNA	hAT-Charlie	65	193	-31	1
934	18	36	31	61	chr17	45815408	45815440	-37442001	+	(CT)n	Simple_repeat	Simple_repeat	1	33	0	1
715	238	225	66	14	chr19	17076613	17076685	-41540931	+	MIR	SINE	MIR	59	134	-128	1
1715	1013	204	36	19	chrX	148208904	148209119	-7831776	-	MER20	DNA	hAT-Charlie	0	219	1	4
2068	318	235	63	118	chr3	194487297	194487466	-3808093	-	MIR3	SINE	MIR	-47	161	3	2
1651	12	315	0	0	chr5	139847468	139847515	-41690744	+	(CCACCC)n	Simple_repeat	Simple_repeat	1	47	0	3
1932	336	287	114	46	chr5	176628346	176628833	-4909426	+	L2a	LINE	L2	2658	3419	-7	3
1306	283	217	28	0	chr9	94588663	94588732	-43805985	+	L2a	LINE	L2	2739	2809	-610	4
906	187	288	78	0	chr7	42186336	42186395	-117159578	+	L2b	LINE	L2	3287	3350	-25	3
1322	3323	129	35	4	chr8	96709112	96709641	-48428995	-	L1PB3	LINE	L1	-7	6916	6371	3
1624	48	39	0	0	chr9	136231875	136231928	-2162789	+	(CCCCCTCCA)n	Simple_repeat	Simple_repeat	1	53	0	4
1568	335	263	143	54	chr11	128878528	128878769	-6207853	-	LTR88c	LTR	Gypsy?	-591	271	6	7
2395	441	355	68	28	chr2	237317372	237317769	-4875760	+	L2b	LINE	L2	2057	2470	-949	2
2414	541	325	86	56	chr2	239768220	239768735	-2424794	+	MER45C	DNA	hAT-Tip100	4	535	-418	2
609	2523	104	8	5	chr3	3199792	3200179	-195095380	-	L1PB1	LINE	L1	-1	6150	5763	2
2067	1150	253	98	10	chr3	194322206	194322605	-3972954	-	LTR33A	LTR	ERVL	0	520	83	2
714	469	181	59	11	chr4	17024361	17024541	-173190014	-	L1PA16	LINE	L1	0	6166	5949	2
714	558	156	11	0	chr4	17024547	17024637	-173189918	-	MER21B	LTR	ERVL	-777	91	1	2
1932	292	324	101	90	chr5	176617211	176617331	-4920928	+	L2a	LINE	L2	3055	3155	-271	3
1877	3122	174	21	2	chr6	169367005	169367575	-1438404	-	L1PA17	LINE	L1	0	6166	5586	3
1320	4060	132	6	8	chr7	96367330	96367985	-62977988	-	L1PB3	LINE	L1	-9	6145	5492	3
751	2079	312	150	42	chr8	21763310	21763950	-123374686	+	L2a	LINE	L2	567	1295	-2124	3
757	178	195	39	34	chr8	22599015	22599525	-122539111	+	(CCTCT)n	Simple_repeat	Simple_repeat	1	530	0	3
757	178	195	39	34	chr8	22599015	22599525	-122539111	+	(CCTCT)n	Simple_repeat	Simple_repeat	1	530	0	3
765	26	153	0	0	chr8	23623811	23623855	-121514781	+	(AC)n	Simple_repeat	Simple_repeat	1	44	0	3
1301	201	251	81	0	chr9	93870713	93870804	-44523913	-	MIR3	SINE	MIR	-58	150	45	4
1621	535	292	188	17	chr9	135884998	135885350	-2509367	+	L2	LINE	L2	2022	2447	-972	4
1226	1739	124	102	0	chr10	84074212	84074477	-49722945	-	AluSz	SINE	Alu	-17	295	1	4
1460	503	312	73	48	chr10	114744814	114745214	-19052208	+	L2	LINE	L2	2328	2738	-681	5
1460	183	182	0	0	chr10	114745195	114745228	-19052194	-	MIR	SINE	MIR	-228	34	2	5
1471	12	0	53	0	chr10	116157652	116157671	-17639751	+	(CTC)n	Simple_repeat	Simple_repeat	1	20	0	5
1476	1507	266	150	22	chr10	116820489	116821685	-16975737	+	L2a	LINE	L2	2033	3419	-7	5
1523	2270	158	3	0	chr10	123029064	123029375	-10768047	+	AluSz6	SINE	Alu	1	312	0	5
1523	1393	250	109	50	chr10	123029375	123029816	-10767606	-	L1ME3Cz	LINE	L1	-145	852	354	5
1576	17	150	43	21	chr10	130000916	130000962	-3796460	+	(CACCCTC)n	Simple_repeat	Simple_repeat	1	48	0	5
1584	541	232	93	30	chr10	131021830	131022045	-2775377	-	MER106B	DNA	hAT-Charlie	-4	1055	882	5
1551	292	348	158	47	chr11	126729908	126730502	-8356120	+	L2c	LINE	L2	2034	2716	-703	7
917	240	362	11	0	chr15	43635247	43635272	-58355917	+	L2a	LINE	L2	3401	3425	-1	1
1211	211	215	32	28	chr15	82058653	82059241	-19931948	+	(CTC)n	Simple_repeat	Simple_repeat	1	607	0	1
767	550	182	57	86	chr16	23977335	23977497	-66360848	+	MER5B	DNA	hAT-Charlie	22	178	0	1
786	530	203	44	84	chr16	26435558	26435773	-63902572	-	L1ME1	LINE	L1	-133	6046	5841	1
803	310	276	0	0	chr16	28658431	28658489	-61679856	+	AluSx4	SINE	Alu	163	220	-90	1
804	284	276	0	0	chr16	28772556	28772614	-61565731	+	AluSx4	SINE	Alu	163	220	-90	1
806	324	259	0	0	chr16	29052475	29052533	-61285812	+	AluSx4	SINE	Alu	163	220	-90	1
974	318	205	46	12	chr16	51109313	51109397	-39228948	+	MLT1I	LTR	ERVL-MaLR	325	411	0	1
1244	238	321	35	49	chr16	86408146	86408290	-3930055	-	LTR33A_	LTR	ERVL	-351	180	39	1
603	21214	96	6	8	chr18	2371763	2375651	-77997634	-	L1PB1	LINE	L1	-5	6146	2265	1
651	355	235	45	23	chr18	8683170	8683257	-71690028	+	MLT1O	LTR	ERVL-MaLR	105	193	-349	1
692	2277	98	36	0	chr18	14048390	14048736	-66324549	-	L1PA14	LINE	L1	-86	6075	5717	1
770	368	261	169	0	chrY	24271290	24271443	-32955972	-	MIR3	SINE	MIR	-3	205	22	4
2367	2304	125	8	27	chr2	233575334	233575703	-8617826	-	THE1B	LTR	ERVL-MaLR	0	364	3	2
2367	10657	102	16	1	chr2	233575705	233577262	-8616267	-	THE1B-int	LTR	ERVL-MaLR	0	1580	1	2
698	235	329	12	12	chr3	14832093	14832179	-183463380	+	MIRb	SINE	MIR	119	204	-64	2
669	5838	71	28	61	chr5	11066337	11066713	-170471546	+	MER4E1	LTR	ERV1	435	781	0	3
604	367	267	111	64	chr6	2516344	2516516	-168289463	+	MIRc	SINE	MIR	64	244	-24	3
1863	1085	235	89	12	chr6	167518303	167518635	-3287344	+	MLT1C	LTR	ERVL-MaLR	57	416	-51	3
747	15	159	29	0	chr8	21346757	21346792	-123791844	+	(TTCA)n	Simple_repeat	Simple_repeat	1	36	0	3
646	2034	136	124	8	chr9	8035753	8036131	-130358586	-	MSTA	LTR	ERVL-MaLR	0	428	1	4
646	10696	134	6	29	chr9	8036131	8037801	-130356916	-	MSTA-int	LTR	ERVL-MaLR	0	1631	1	4
827	747	320	67	39	chr15	31771279	31771614	-70219575	+	L2a	LINE	L2	2389	2733	-686	1
827	13	139	29	29	chr15	31771650	31771684	-70219505	+	(CTCCAC)n	Simple_repeat	Simple_repeat	1	35	0	1
844	12	113	69	0	chr16	33982679	33982708	-56355637	+	(CAGCT)n	Simple_repeat	Simple_repeat	1	31	0	1
699	2093	168	45	34	chr17	15013282	15013824	-68243617	+	MLT2A2	LTR	ERVL	1	554	0	1
713	335	387	36	10	chr17	16848734	16849136	-66408305	+	L2c	LINE	L2	2603	3015	-404	1
729	307	264	92	15	chr17	18987532	18987663	-64269778	-	MIR3	SINE	MIR	-65	143	2	1
741	296	316	42	31	chr17	20520409	20520667	-62736774	+	L2	LINE	L2	2603	2863	-556	1
2128	2096	122	3	0	chr2	202361762	202362050	-39831479	-	AluSx1	SINE	Alu	-23	289	1	2
2128	2993	132	32	105	chr2	202362050	202362389	-39831140	-	MER41A	LTR	ERV1	-185	369	51	2
2075	430	182	0	0	chr3	195406552	195406618	-2888941	-	AluJr	SINE	Alu	-233	79	14	2
1665	2440	83	7	0	chr5	141610298	141610598	-39927661	-	AluSc	SINE	Alu	-7	302	1	3
1665	1990	118	29	68	chr5	141610598	141610749	-39927510	-	AluSg4	SINE	Alu	-177	133	1	3
1939	743	248	140	22	chr5	177500000	177500202	-4038057	+	L2a	LINE	L2	2853	3078	-341	3
622	397	285	137	56	chr6	4901716	4902002	-165903977	-	MLT1K	LTR	ERVL-MaLR	-1	594	282	3
653	363	301	27	40	chr8	8935600	8935752	-136202884	+	L4_C_Mam	LINE	RTE-X	2606	2755	-2383	3
789	382	350	99	10	chr8	26785916	26786219	-118352417	+	L2b	LINE	L2	2655	2996	-423	3
789	1755	101	0	119	chr8	26786219	26786547	-118352089	-	AluSz	SINE	Alu	0	312	24	3
1562	505	243	121	5	chr10	128124322	128124512	-5672910	-	MER20	DNA	hAT-Charlie	-4	215	1	5
1583	3983	236	62	50	chr10	130911565	130912641	-2884781	-	L1MB8	LINE	L1	-4957	1910	810	5
1537	438	316	162	21	chr11	124804976	124805346	-10281276	+	L2a	LINE	L2	2951	3386	-40	7
1094	1467	279	62	29	chr12	66777097	66777681	-66497628	+	L2a	LINE	L2	2835	3425	-1	8
787	2045	127	14	7	chr15	26509452	26509743	-75481446	-	AluSx1	SINE	Alu	-19	293	1	1
787	3077	216	54	18	chr15	26509743	26509805	-75481384	+	L1M4	LINE	L1	4196	4253	-1893	1
1191	315	360	77	19	chr15	79520587	79521003	-22470186	+	L2c	LINE	L2	993	1434	-1985	1
983	3312	191	75	30	chr16	52272559	52273358	-38064987	+	MER21C	LTR	ERVL	1	934	-4	1
943	1398	172	5	5	chr17	46966425	46966647	-36290794	-	AluJb	SINE	Alu	-90	222	1	1
943	443	346	70	32	chr17	46966658	46966879	-36290562	+	MIR	SINE	MIR	32	261	-1	1
937	2364	103	3	0	chr18	46208464	46208765	-34164520	-	AluSc	SINE	Alu	-6	303	2	1
838	2192	126	0	7	chr19	33184927	33185228	-25432388	-	AluSz	SINE	Alu	-13	299	1	1
1067	15	140	106	0	chr20	63273123	63273170	-1170997	+	(CGC)n	Simple_repeat	Simple_repeat	1	52	0	2
1073	307	296	42	17	chr20	64093218	64093335	-350832	-	MIRb	SINE	MIR	-31	237	118	2
754	3990	192	28	5	chr22	22176208	22176973	-28641495	+	LTR39	LTR	ERV1	1	783	0	2
1078	2296	104	0	7	chr2	64694920	64695228	-177498301	-	AluSx1	SINE	Alu	-2	310	5	2
1078	226	274	0	23	chr2	64695238	64695324	-177498205	-	L1MEf	LINE	L1	-5655	745	662	2
1348	2147	136	19	12	chr2	100121056	100121376	-142072153	+	LTR1D1	LTR	ERV1	1	322	-577	2
1948	1895	164	0	32	chr2	178769252	178769563	-63423966	-	AluJr	SINE	Alu	-11	301	1	2
2380	2488	138	5	0	chr2	235332190	235332574	-6860955	+	MLT1B	LTR	ERVL-MaLR	5	390	0	2
633	2392	157	60	31	chr5	6302161	6302642	-175235617	-	LTR22C2	LTR	ERVK	0	496	1	3
651	1916	115	76	24	chr5	8709638	8709926	-172828333	-	AluSp	SINE	Alu	-9	304	1	3
651	2989	115	26	26	chr5	8709926	8710043	-172828216	-	L1PREC2	LINE	L1	-818	5328	5213	3
1326	417	255	0	0	chr9	97149992	97150094	-41244623	-	MSTA-int	LTR	ERVL-MaLR	-1522	129	28	4
1590	441	249	82	13	chr10	131738739	131738919	-2058503	-	L1ME3A	LINE	L1	-38	6204	5993	5
1596	266	321	114	40	chr10	132624668	132625048	-1172374	+	L2b	LINE	L2	2323	2734	-685	5
1484	12	232	0	91	chr11	117870463	117870529	-17216093	+	(CCAGGC)n	Simple_repeat	Simple_repeat	1	66	0	7
1538	4333	256	97	60	chr11	124952023	124953627	-10132995	+	L2a	LINE	L2	1685	3426	0	7
1163	13	215	74	0	chr15	75836056	75836110	-26155079	+	(TATTTTA)n	Simple_repeat	Simple_repeat	1	58	0	1
751	254	282	79	71	chr16	21826492	21826618	-68511727	-	LTR85c	LTR	Gypsy?	-641	182	56	1
835	318	212	15	0	chr16	32845613	32845679	-57492666	+	MIR3	SINE	MIR	95	161	-47	1
1234	1108	142	29	0	chr16	85098927	85099159	-5239186	+	L1PBa	LINE	L1	1900	2138	-4725	1
1234	471	308	91	0	chr16	85099274	85099495	-5238850	+	MER46C	DNA	TcMar-Tigger	96	338	0	1
1235	1822	206	23	50	chr16	85212430	85212708	-5125637	+	MLT1B	LTR	ERVL-MaLR	117	388	-2	1
1029	27	266	39	19	chr17	58278414	58278516	-24978925	+	(TC)n	Simple_repeat	Simple_repeat	1	106	0	1
1376	214	286	145	43	chrX	103723502	103723619	-52317276	-	MamTip2	DNA	hAT-Tip100	-173	132	2	4
731	3692	98	40	0	chrY	19153236	19153764	-38073651	-	MER11B	LTR	ERVK	-686	550	1	4
1015	33	0	0	0	chr1	56414564	56414592	-192541830	+	(CA)n	Simple_repeat	Simple_repeat	1	28	0	1
1224	20	192	0	20	chr2	83806059	83806108	-158387421	+	A-rich	Low_complexity	Low_complexity	1	49	0	2
2105	218	302	0	0	chr2	199334463	199334526	-42859003	-	L3	LINE	CR1	-2	4097	4035	2
2373	1014	223	161	56	chr2	234423170	234423360	-7770169	+	MLT1D	LTR	ERVL-MaLR	20	204	-301	2
2021	2335	98	0	0	chr3	188245117	188245393	-10050166	-	AluSg	SINE	Alu	-17	293	18	2
1652	1170	327	52	35	chr5	139857685	139858560	-41679699	+	L2a	LINE	L2	2447	3349	-77	3
1662	5420	59	25	3	chr5	141257691	141258355	-40279904	-	L1PA6	LINE	L1	0	6154	5476	3
1937	2066	152	3	0	chr5	177231100	177231383	-4306876	-	AluJr	SINE	Alu	-27	285	2	3
757	338	238	95	0	chr8	22561600	22561705	-122576931	+	MIRb	SINE	MIR	114	229	-39	3
811	193	375	28	116	chr8	29681127	29681447	-115457189	+	L2c	LINE	L2	2602	2892	-527	3
1443	2743	45	0	0	chr10	112576009	112576319	-21221103	-	AluYk4	SINE	Alu	-1	310	1	5
1561	2763	222	51	60	chr10	127930122	127930779	-5866643	-	L1ME1	LINE	L1	-27	6152	5482	5
1479	324	266	88	39	chr11	117303851	117304009	-17782613	-	MIRc	SINE	MIR	-48	160	3	7
1479	1541	207	131	23	chr11	117304027	117304462	-17782160	+	MLT1H2	LTR	ERVL-MaLR	1	489	0	7
1566	13	195	0	27	chr11	128684233	128684270	-6402352	+	(CCTGCCC)n	Simple_repeat	Simple_repeat	1	37	0	7
769	14	175	0	0	chr15	24169300	24169332	-77821857	+	(CCCTGC)n	Simple_repeat	Simple_repeat	1	32	0	1
794	180	288	14	64	chr16	27499620	27499698	-62838647	+	MIRc	SINE	MIR	130	203	-65	1
824	923	301	96	38	chr17	31451481	31451894	-51805547	+	L2a	LINE	L2	2812	3249	-177	1
824	1362	147	54	0	chr17	31451894	31452139	-51805302	-	L1MA4	LINE	L1	-3	6297	6039	1
863	3027	225	33	22	chr17	36476863	36476993	-46780448	-	L1ME1	LINE	L1	-101	6245	6108	1
863	2276	92	0	0	chr17	36476993	36477288	-46780153	-	AluSc	SINE	Alu	-13	296	2	1
865	1505	188	0	11	chr17	36820006	36820278	-46437163	+	AluJb	SINE	Alu	38	306	-6	1
882	4446	166	90	38	chr17	39011629	39012479	-44244962	+	LTR1D1	LTR	ERV1	1	899	0	1
1108	1697	280	93	47	chr17	68635551	68636298	-14621143	-	HAL1	LINE	L1	-814	1693	895	1
1108	16	0	0	0	chr17	68636324	68636341	-14621100	+	(T)n	Simple_repeat	Simple_repeat	1	17	0	1
601	6004	162	38	0	chr18	2179304	2180242	-78193043	+	LTR1D	LTR	ERV1	1	975	0	1
836	2033	146	13	0	chr19	32968246	32968547	-25649069	-	AluSx	SINE	Alu	-7	305	1	1
755	6585	145	62	12	chr22	22295955	22297249	-28521219	+	L1M1	LINE	L1	2786	4148	-1998	2
755	2222	178	63	2	chr22	22297249	22297738	-28520730	-	REP522	Satellite	telo	0	1817	1297	2
1378	2682	240	2	16	chr2	103983658	103984218	-138209311	+	MLT2B3	LTR	ERVL	3	554	0	2
1378	2106	122	0	0	chr2	103984287	103984557	-138208972	-	AluSg	SINE	Alu	-40	270	1	2
2351	2392	67	201	3	chr2	231569532	231569891	-10623638	+	LTR7	LTR	ERV1	1	448	-2	2
1789	3077	176	106	32	chr6	157897054	157897518	-12908461	-	MER21C	LTR	ERVL	-5	863	366	3
1296	18	136	49	0	chr9	93299814	93299855	-45094862	+	(CCGCC)n	Simple_repeat	Simple_repeat	1	43	0	4
1452	2239	107	0	7	chr10	113707751	113708050	-20089372	-	AluSx	SINE	Alu	-12	300	4	5
1601	24	198	11	83	chr10	133272310	133272415	-525007	+	(CTCC)n	Simple_repeat	Simple_repeat	1	97	0	5
1601	24	198	11	83	chr10	133272310	133272415	-525007	+	(CTCC)n	Simple_repeat	Simple_repeat	1	97	0	5
1026	2164	109	55	16	chr1	57840495	57840860	-191115562	-	THE1D	LTR	ERVL-MaLR	-1	380	1	1
1026	10729	104	31	17	chr1	57840860	57842468	-191113954	-	THE1D-int	LTR	ERVL-MaLR	0	1631	1	1
1040	2001	130	91	21	chr1	59711539	59711877	-189244545	-	THE1B	LTR	ERVL-MaLR	0	364	1	1
1040	11836	88	25	0	chr1	59711877	59713417	-189243005	-	THE1B-int	LTR	ERVL-MaLR	0	1580	2	1
1203	2386	128	11	6	chr2	81065001	81065363	-161128166	-	THE1B	LTR	ERVL-MaLR	0	364	1	2
1203	9894	122	44	2	chr2	81065363	81066872	-161126657	-	THE1B-int	LTR	ERVL-MaLR	0	1580	5	2
722	2111	167	28	17	chr4	18004267	18004627	-172209928	-	THE1B	LTR	ERVL-MaLR	0	364	1	2
722	11239	93	20	13	chr4	18004627	18004927	-172209628	-	THE1B-int	LTR	ERVL-MaLR	0	1580	1282	2
1881	4306	122	54	16	chr6	169911819	169912564	-893415	+	LTR1A2	LTR	ERV1	63	837	0	3
1080	2299	132	82	5	chr8	64948466	64948861	-80189775	-	MSTA	LTR	ERVL-MaLR	0	428	1	3
1080	9696	165	14	4	chr8	64948861	64950476	-80188160	-	MSTA-int	LTR	ERVL-MaLR	0	1631	1	3
634	2017	145	17	0	chr9	6430019	6430309	-131964408	-	AluSq2	SINE	Alu	-18	295	1	4
1475	13	249	14	69	chr10	116774790	116774861	-17022561	+	(CTGCAGC)n	Simple_repeat	Simple_repeat	1	72	0	5
1479	712	331	210	24	chr11	117300822	117301308	-17785314	+	L2b	LINE	L2	1753	2429	-990	7
1483	21	155	73	27	chr11	117796951	117797019	-17289603	+	(CCG)n	Simple_repeat	Simple_repeat	1	73	0	7
1498	290	250	118	13	chr11	119729596	119729745	-15356877	-	MIR3	SINE	MIR	-24	184	30	7
1572	1465	282	124	18	chr11	129432855	129433992	-5652630	+	L2a	LINE	L2	2146	3423	-3	7
707	580	289	85	42	chr16	16096935	16097097	-74241248	+	L2a	LINE	L2	3155	3324	-102	1
973	391	266	9	50	chr16	50917217	50917336	-39421009	+	Tigger18a	DNA	TcMar-Tigger	39	152	-700	1
601	1407	188	68	8	chr17	2115745	2116006	-81141435	-	AluJo	SINE	Alu	-34	278	1	1
721	188	276	26	62	chr17	17850270	17850351	-65407090	-	MamRTE1	LINE	RTE-BovB	-3165	647	570	1
848	537	277	78	17	chr17	34562717	34562956	-48694485	+	MIRb	SINE	MIR	6	268	0	1
935	374	335	104	57	chr17	45975162	45975390	-37282051	-	MamRTE1	LINE	RTE-BovB	-1436	2376	2137	1
1096	288	309	0	13	chr17	66994432	66994536	-16262905	-	MIR	SINE	MIR	-90	172	80	1
1096	314	327	148	15	chr17	66994587	66994792	-16262649	+	MIRb	SINE	MIR	11	247	-21	1
1113	4975	131	33	53	chr17	69212988	69213874	-14043567	-	L1PB1	LINE	L1	-5543	1320	453	1
646	35	132	17	0	chr18	8099073	8099180	-72274105	+	(TC)n	Simple_repeat	Simple_repeat	1	108	0	1
677	2291	114	55	11	chr18	12108196	12108560	-68264725	-	THE1D	LTR	ERVL-MaLR	0	381	1	1
677	6156	133	19	1	chr18	12108560	12109458	-68263827	-	THE1D-int	LTR	ERVL-MaLR	0	1631	718	1
1158	290	330	105	39	chr18	75198698	75198903	-5174382	-	LFSINE_Vert	SINE	tRNA	-105	354	135	1
838	207	315	14	0	chr19	33219728	33219801	-25397815	+	L2b	LINE	L2	3090	3163	-212	1
720	631	261	132	0	chrX	17736604	17736788	-138304107	-	MIR	SINE	MIR	-28	234	23	4
756	1503	196	21	11	chrY	22537951	22538237	-34689178	-	AluSg7	SINE	Alu	-16	293	5	4
779	12	139	0	0	chrY	25480967	25480991	-31746424	+	(GGA)n	Simple_repeat	Simple_repeat	1	24	0	4
1615	528	344	101	23	chr9	135068200	135068637	-3326080	-	L2	LINE	L2	-742	2677	2203	4
1336	1710	182	62	35	chr15	98446923	98447242	-3543947	-	MLT1B	LTR	ERVL-MaLR	-50	340	4	1
812	13	291	50	24	chr16	29815087	29815167	-60523178	+	(TCTTC)n	Simple_repeat	Simple_repeat	1	84	0	1
812	13	291	50	24	chr16	29815087	29815167	-60523178	+	(TCTTC)n	Simple_repeat	Simple_repeat	1	84	0	1
693	484	199	176	7	chr18	14174525	14174667	-66198618	+	REP522	Satellite	telo	561	731	-1086	1
1041	2420	99	0	10	chr1	59860763	59861075	-189095347	-	AluSx3	SINE	Alu	-2	309	1	1
1041	1864	165	0	51	chr1	59861075	59861211	-189095211	-	AluSx	SINE	Alu	-190	122	1	1
1714	500	195	0	0	chr1	148029154	148029236	-100927186	-	AluJb	SINE	Alu	-193	119	38	2
1714	6184	137	47	23	chr1	148029236	148030871	-100925551	+	LOR1-int	LTR	ERV1	3570	6064	-2056	2
1048	2301	92	10	0	chr2	60703118	60703411	-181490118	-	AluSx3	SINE	Alu	-15	296	1	2
1048	883	195	6	18	chr2	60703412	60703576	-181489953	-	FRAM	SINE	Alu	-14	162	1	2
1198	2347	104	7	0	chr2	80468406	80468715	-161724814	-	AluSx3	SINE	Alu	0	311	1	2
1210	2193	128	0	7	chr2	81982468	81982773	-160210756	-	AluSx1	SINE	Alu	-5	307	5	2
1324	1648	164	4	21	chr2	96980410	96980697	-145212832	-	AluJo	SINE	Alu	-25	287	6	2
1324	319	105	30	4	chr2	96980711	96980788	-145212741	-	L1M5	LINE	L1	-811	5431	5352	2
1383	2098	133	0	3	chr2	104683421	104683715	-137509814	-	AluJo	SINE	Alu	-11	301	9	2
1383	18	176	0	0	chr2	104683736	104683768	-137509761	+	(T)n	Simple_repeat	Simple_repeat	1	32	0	2
1392	1895	172	0	13	chr2	105889571	105889885	-136303644	-	AluJr	SINE	Alu	-2	310	1	2
1396	2022	147	3	10	chr2	106401424	106401724	-135791805	-	AluSx	SINE	Alu	-14	298	1	2
1442	2070	137	3	10	chr2	112366508	112366808	-129826721	-	AluSx	SINE	Alu	-14	298	1	2
1687	773	148	0	0	chr2	144473437	144473545	-97719984	-	AluJo	SINE	Alu	-187	125	18	2
1938	1744	189	21	0	chr2	177450974	177451255	-64742274	-	AluJr4	SINE	Alu	-25	287	1	2
1938	3800	222	99	53	chr2	177451255	177451760	-64741769	-	L1ME1	LINE	L1	-1708	4611	4079	2
1963	1380	310	114	50	chr2	180742123	180743003	-61450526	+	L2a	LINE	L2	2457	3408	-18	2
2008	1936	125	4	4	chr2	186538781	186539045	-55654484	-	AluSq	SINE	Alu	-48	265	2	2
2008	7054	151	21	92	chr2	186539045	186539478	-55654051	-	L1MC1	LINE	L1	-1779	4542	4137	2
2133	2173	139	0	0	chr2	202960254	202960549	-39232980	-	AluSx	SINE	Alu	-17	295	1	2
2133	361	285	102	108	chr2	202960549	202960640	-39232889	-	L4_A_Mam	LINE	RTE-X	-351	4639	4549	2
2135	2670	244	141	90	chr2	203187757	203188003	-39005526	-	MLT1H2-int	LTR	ERVL-MaLR	-1060	349	67	2
2136	2159	120	10	7	chr2	203386640	203386939	-38806590	-	AluSx1	SINE	Alu	-12	300	1	2
2400	1579	172	63	21	chr2	237999071	237999361	-4194168	-	AluSz6	SINE	Alu	-1	311	9	2
2400	1645	249	95	42	chr2	237999361	237999772	-4193757	-	L1ME2	LINE	L1	-985	5161	4744	2
2423	274	221	90	16	chr2	240967758	240967882	-1225647	+	L2a	LINE	L2	3025	3158	-268	2
2431	401	218	13	0	chr2	241981377	241981455	-212074	-	MER5A1	DNA	hAT-Charlie	-46	120	42	2
2431	1870	93	0	0	chr2	241995765	241996001	-197528	-	AluSz	SINE	Alu	-76	236	1	2
595	2132	138	3	0	chr3	1345119	1345415	-196950144	-	AluSz	SINE	Alu	-15	297	1	2
595	13	92	83	0	chr3	1345415	1345441	-196950118	+	(TACAAT)n	Simple_repeat	Simple_repeat	4	32	0	2
673	2050	129	7	14	chr3	11598031	11598326	-186697233	-	AluSx3	SINE	Alu	-18	293	1	2
700	1412	127	51	0	chr3	15124662	15124867	-183170692	-	AluSz	SINE	Alu	-96	216	1	2
1456	1250	189	0	5	chr3	114184667	114184863	-84110696	-	AluSz	SINE	Alu	-117	195	1	2
1456	7545	152	54	25	chr3	114184863	114185678	-84109881	-	L1M4c	LINE	L1	-4730	1654	810	2
2056	2228	112	10	0	chr3	192936364	192936668	-5358891	-	AluSz	SINE	Alu	-5	307	1	2
2060	2009	138	0	39	chr3	193459426	193459737	-4835822	-	AluSx1	SINE	Alu	-12	300	2	2
2061	2032	108	71	0	chr3	193538885	193539172	-4756387	-	AluSp	SINE	Alu	-4	309	1	2
2061	593	224	85	128	chr3	193539172	193539255	-4756304	-	MER58A	DNA	hAT-Charlie	-140	84	1	2
2081	833	168	0	0	chr3	196093280	196093405	-2202154	-	AluJr	SINE	Alu	-187	125	1	2
2090	1679	156	75	14	chr3	197286894	197287170	-1008389	-	AluJb	SINE	Alu	-18	294	1	2
2090	425	144	104	0	chr3	197287182	197287277	-1008282	+	L1MC2	LINE	L1	6256	6342	-2	2
724	2074	132	0	0	chr4	18225861	18226148	-171988407	-	AluSz6	SINE	Alu	0	312	26	2
1206	2222	94	10	3	chr4	81457026	81457313	-108757242	-	AluSx	SINE	Alu	-20	292	4	2
589	2052	154	0	22	chr5	559641	559960	-180978299	-	AluJb	SINE	Alu	0	312	1	3
589	2292	92	0	3	chr5	559969	560262	-180977997	-	AluSc	SINE	Alu	-17	292	1	3
1126	2102	139	0	0	chr5	70953153	70953456	-110584803	-	AluSz6	SINE	Alu	-9	303	1	3
1615	2262	111	6	19	chr5	135022776	135023092	-46515167	-	AluSz	SINE	Alu	0	312	1	3
1615	4581	126	34	34	chr5	135023092	135023396	-46514863	-	L1MB3	LINE	L1	-603	5580	5278	3
1657	1774	185	10	10	chr5	140580095	140580398	-40957861	-	AluJb	SINE	Alu	-9	303	1	3
1657	4420	170	52	56	chr5	140580398	140580707	-40957552	+	L1MB5	LINE	L1	2842	3153	-3594	3
745	1707	204	3	20	chr6	20987780	20988084	-149817895	-	AluJb	SINE	Alu	-13	299	1	3
745	257	311	22	102	chr6	20988084	20988141	-149817838	+	MIR	SINE	MIR	98	147	-115	3
842	2531	84	0	0	chr6	33729701	33730011	-137075968	-	AluSg4	SINE	Alu	0	310	1	3
842	432	247	27	67	chr6	33730011	33730088	-137075891	+	LTR33	LTR	ERVL	444	511	-4	3
1144	1866	88	107	15	chr6	73272162	73272434	-97533545	-	AluSx3	SINE	Alu	-11	300	1	3
1144	535	222	44	89	chr6	73272434	73272493	-97533486	-	MER110	LTR	ERV1	-89	402	355	3
1792	2037	183	0	0	chr6	158289577	158289878	-12516101	-	AluJo	SINE	Alu	-9	303	3	3
1792	254	270	0	16	chr6	158289880	158289944	-12516035	-	L1PB	LINE	L1	-3118	3028	2966	3
1816	1638	156	83	18	chr6	161372825	161373107	-9432872	-	AluJr	SINE	Alu	-8	304	3	3
1816	1224	190	0	13	chr6	161373110	161373344	-9432635	-	MLT2C2	LTR	ERVL	-233	231	1	3
1816	2464	86	3	0	chr6	161450549	161450853	-9355126	-	AluSc8	SINE	Alu	-5	306	2	3
1816	379	265	133	44	chr6	161450853	161451024	-9354955	-	MER113	DNA	hAT-Charlie	-88	433	239	3
1819	574	265	55	5	chr6	161849499	161849704	-8956275	+	MER92D	LTR	ERV1	105	320	0	3
1144	2030	99	42	0	chr7	73309109	73309382	-86036591	-	AluSx	SINE	Alu	-21	291	7	3
1147	1387	174	88	37	chr7	73687574	73687678	-85658295	-	AluJb	SINE	Alu	-179	133	11	3
1154	2326	114	0	0	chr7	74671079	74671385	-84674588	-	AluSx	SINE	Alu	0	312	2	3
1360	2113	126	0	7	chr7	101628175	101628477	-57717496	+	AluJr	SINE	Alu	5	304	-8	3
1373	1946	165	0	13	chr7	103330748	103330881	-56015092	-	AluJb	SINE	Alu	-179	133	1	3
1373	4296	128	28	70	chr7	103330885	103330964	-56015009	-	L1MA4A	LINE	L1	-5	6298	6243	3
650	2496	99	0	0	chr8	8586548	8586841	-136551795	-	AluSq2	SINE	Alu	-20	293	1	3
650	612	287	90	128	chr8	8586841	8587067	-136551569	+	L2a	LINE	L2	3221	3422	-4	3
756	2358	94	7	3	chr8	22425883	22426190	-122712446	-	AluSp	SINE	Alu	-4	309	2	3
756	1897	157	10	0	chr8	22426190	22426490	-122712146	-	AluJo	SINE	Alu	-7	305	3	3
786	1604	186	27	20	chr8	26452388	26452684	-118685952	-	AluJr	SINE	Alu	-12	300	3	3
815	1820	139	0	8	chr8	30250792	30251051	-114887585	-	AluSz	SINE	Alu	-55	257	1	3
1086	2007	129	31	7	chr8	65670707	65670993	-79467643	-	AluSg	SINE	Alu	-16	294	2	3
590	2186	115	0	0	chr9	703003	703291	-137691426	-	AluSz	SINE	Alu	-24	288	1	4
635	2218	99	0	0	chr9	6613780	6614064	-131780653	-	AluSx	SINE	Alu	-16	296	13	4
635	1978	148	3	23	chr9	6649550	6649860	-131744857	-	AluSz	SINE	Alu	-8	304	1	4
635	2414	188	128	202	chr9	6649860	6649942	-131744775	+	MER21B	LTR	ERVL	794	868	0	4
1310	1969	146	0	26	chr9	95155712	95156020	-43238697	-	AluJb	SINE	Alu	-7	305	6	4
1311	2423	106	23	0	chr9	95238553	95238855	-43155862	-	AluSc8	SINE	Alu	0	311	3	4
1311	451	329	91	46	chr9	95238855	95239213	-43155504	+	L2c	LINE	L2	2819	3206	-181	4
1326	565	249	104	11	chr9	97128421	97128701	-41266016	+	L2	LINE	L2	2744	3052	-367	4
1380	755	156	0	0	chr10	104276662	104276771	-29520651	-	FLAM_C	SINE	Alu	-34	109	1	5
1399	2301	86	0	0	chr10	106806505	106806812	-26990610	-	AluYf1	SINE	Alu	0	311	3	5
1471	2081	138	0	0	chr10	116221434	116221724	-17575698	-	AluSx	SINE	Alu	-22	290	1	5
1485	912	137	0	0	chr10	117994082	117994206	-15803216	-	FLAM_C	SINE	Alu	-19	124	1	5
1485	595	246	129	135	chr10	117994206	117994560	-15802862	-	L1MC4	LINE	L1	-215	7827	7443	5
1498	1798	184	0	0	chr10	119773068	119773356	-14024066	-	AluJo	SINE	Alu	-24	288	1	5
1498	1146	155	30	0	chr10	119773358	119773551	-14023871	-	L1PA17	LINE	L1	-7	6159	5961	5
1511	2086	92	18	4	chr10	121429248	121429521	-12367901	-	AluSx1	SINE	Alu	-12	300	24	5
1514	971	169	0	41	chr10	121783884	121784056	-12013366	-	AluJr	SINE	Alu	-11	301	137	5
1556	2219	134	0	0	chr10	127294308	127294621	-6502801	-	AluSq2	SINE	Alu	0	313	1	5
1564	193	318	106	18	chr10	128321740	128321852	-5475570	+	MIRb	SINE	MIR	104	226	-42	5
1576	2102	138	3	0	chr10	130002426	130002723	-3794699	-	AluSz6	SINE	Alu	-14	298	1	5
1576	247	281	50	0	chr10	130002723	130002759	-3794663	-	AluSx	SINE	Alu	-265	37	2	5
1590	2230	112	0	7	chr10	131801222	131801518	-1995904	-	AluSq2	SINE	Alu	-19	294	1	5
1590	1264	306	91	46	chr10	131801518	131802425	-1994997	+	L1M5	LINE	L1	4633	5588	-2294	5
1594	1696	148	41	41	chr10	132330518	132330809	-1466613	-	AluJr	SINE	Alu	-21	291	1	5
831	1962	130	39	10	chr11	32252071	32252371	-102834251	-	AluSz	SINE	Alu	-2	310	2	6
1478	2355	100	0	0	chr11	117158640	117158939	-17927683	-	AluSq2	SINE	Alu	-9	304	6	7
1478	276	282	121	53	chr11	117158939	117159065	-17927557	+	L1MC4	LINE	L1	7791	7921	-121	7
1499	1005	351	67	25	chr11	119869618	119870535	-15216087	+	L2b	LINE	L2	1673	2630	-789	7
1504	216	258	70	31	chr11	120518147	120518243	-14568379	+	MIRc	SINE	MIR	2	101	-167	7
1547	1976	161	3	0	chr11	126208995	126209286	-8877336	-	AluJr	SINE	Alu	-16	296	5	7
1576	2187	117	7	3	chr11	129970545	129970845	-5115777	-	AluSq	SINE	Alu	-12	301	1	7
1576	485	264	173	25	chr11	129970861	129970951	-5115671	-	Charlie22a	DNA	hAT-Charlie	-197	294	199	7
1581	205	143	0	28	chr11	130672472	130672508	-4414114	+	X6B_LINE	LINE	CR1	1035	1069	-3	7
1100	788	297	75	1	chr12	67617655	67618025	-65657284	+	L2a	LINE	L2	2799	3193	-233	8
810	2217	84	56	0	chr14	29586639	29586924	-77456794	-	AluSp	SINE	Alu	-11	302	1	1
810	777	337	119	58	chr14	29586924	29587147	-77456571	+	L3	LINE	CR1	3569	3823	-276	1
822	2339	71	0	4	chr15	31104586	31104892	-70886297	-	AluY	SINE	Alu	0	311	2	1
822	4227	249	96	95	chr15	31104892	31105425	-70885764	-	L1MC5	LINE	L1	-770	8534	7945	1
1156	2569	51	0	3	chr15	74928385	74928681	-27062508	-	AluY	SINE	Alu	-13	298	4	1
1211	1541	234	84	5	chr15	82105365	82105794	-19885395	-	LTR33	LTR	ERVL	-32	483	18	1
1346	2502	92	0	13	chr15	99813928	99814232	-2176957	-	AluSc	SINE	Alu	-9	300	1	1
1351	2365	122	0	0	chr15	100407876	100408171	-1583018	-	AluSq2	SINE	Alu	-18	295	1	1
1351	1623	155	86	96	chr15	100408171	100408255	-1582934	+	MER2	DNA	TcMar-Tigger	264	339	-6	1
1357	2195	78	54	0	chr15	101229946	101230227	-760962	-	AluSq	SINE	Alu	-16	297	1	1
1357	1639	203	23	99	chr15	101230227	101230264	-760925	+	L1M4	LINE	L1	3056	3080	-3558	1
699	1845	180	0	0	chr16	15048628	15048922	-75289423	-	AluJr	SINE	Alu	-17	295	2	1
699	869	174	0	0	chr16	15048925	15049057	-75289288	-	AluJo	SINE	Alu	-179	133	2	1
699	869	174	0	0	chr16	15048925	15049057	-75289288	-	AluJo	SINE	Alu	-179	133	2	1
699	1191	229	104	0	chr16	15049061	15049328	-75289017	-	AluSz	SINE	Alu	-14	298	1	1
699	1191	229	104	0	chr16	15049061	15049328	-75289017	-	AluSz	SINE	Alu	-14	298	1	1
700	1744	143	11	11	chr16	15148370	15148673	-75189672	-	AluJb	SINE	Alu	0	312	11	1
700	659	232	40	43	chr16	15148673	15148779	-75189566	-	L1M4	LINE	L1	-817	5329	5220	1
701	952	148	0	0	chr16	15295783	15295918	-75042427	-	AluJr4	SINE	Alu	-176	136	2	1
704	1931	153	0	0	chr16	15690812	15691106	-74647239	-	AluSq2	SINE	Alu	-18	295	2	1
808	2045	105	28	4	chr16	29358529	29358806	-60979539	-	AluSx1	SINE	Alu	-28	284	1	1
843	2247	129	3	0	chr16	33900179	33900489	-56437856	-	AluSz	SINE	Alu	-1	311	1	1
942	1902	142	24	3	chr16	46914910	46915199	-43423146	-	AluJo	SINE	Alu	-5	307	13	1
1238	1567	199	38	7	chr16	85704594	85704875	-4633470	-	AluJb	SINE	Alu	-16	296	7	1
1238	421	223	118	60	chr16	85704875	85704987	-4633358	-	MER45A	DNA	hAT-Tip100	-48	130	2	1
1240	1923	118	68	0	chr16	85971298	85971570	-4366775	-	AluSz6	SINE	Alu	-8	304	13	1
1240	4028	100	11	11	chr16	85971570	85971641	-4366704	+	MER41A	LTR	ERV1	486	553	-1	1
1242	1387	259	57	28	chr16	86115842	86116374	-4221971	-	L1ME1	LINE	L1	-3	6176	5629	1
606	2144	125	0	3	chr17	2882293	2882588	-80374853	-	AluSg	SINE	Alu	-15	295	2	1
606	1661	110	0	18	chr17	2882588	2882641	-80374800	-	AluSx	SINE	Alu	-176	136	84	1
714	2229	100	0	7	chr17	17032981	17033271	-66224170	-	AluSx	SINE	Alu	-24	288	1	1
736	1751	142	54	11	chr17	19885629	19885911	-63371530	-	AluJo	SINE	Alu	-15	297	3	1
831	799	171	0	0	chr17	32297682	32297799	-50959642	-	AluJo	SINE	Alu	-195	117	1	1
838	450	274	187	4	chr17	33220184	33220451	-50036990	-	L3	LINE	CR1	-96	4003	3677	1
864	1746	110	24	4	chr17	36640689	36640934	-46616507	-	AluSx1	SINE	Alu	0	312	63	1
864	2207	115	0	0	chr17	36649131	36649426	-46608015	-	AluSx1	SINE	Alu	-17	295	1	1
867	1865	160	0	39	chr17	37080471	37080783	-46176658	-	AluJb	SINE	Alu	-12	300	1	1
867	4629	231	110	71	chr17	37080783	37080892	-46176549	-	L1MB2	LINE	L1	-1688	968	881	1
886	2039	109	42	0	chr17	39520392	39520685	-43736756	-	AluSx	SINE	Alu	-5	307	2	1
886	28	33	0	0	chr17	39520686	39520717	-43736724	+	(TGT)n	Simple_repeat	Simple_repeat	1	31	0	1
947	2237	122	3	7	chr17	47569615	47569918	-35687523	-	AluSx1	SINE	Alu	-10	302	1	1
587	1873	148	23	33	chr18	280644	280949	-80092336	-	AluJb	SINE	Alu	-10	302	1	1
587	2532	170	17	86	chr18	280949	281397	-80091888	+	Tigger1	DNA	TcMar-Tigger	55	478	-1940	1
590	2354	97	0	0	chr18	765399	765697	-79607588	-	AluSx3	SINE	Alu	-13	298	1	1
632	2522	74	0	0	chr18	6196157	6196456	-74176829	-	AluY	SINE	Alu	-12	299	1	1
681	2152	110	10	7	chr18	12665695	12665994	-67707291	-	AluSq2	SINE	Alu	-13	300	1	1
686	1754	180	7	0	chr18	13355640	13355929	-67017356	-	AluJr	SINE	Alu	-21	291	1	1
686	663	287	64	40	chr18	13355936	13356335	-67016950	-	LTR16A1	LTR	ERVL	-1	455	47	1
940	2466	93	0	3	chr18	46551091	46551402	-33821883	-	AluY	SINE	Alu	-1	310	1	1
1171	1707	171	28	4	chr18	76819393	76819668	-3553617	-	AluJb	SINE	Alu	-24	288	7	1
1171	849	197	58	0	chr18	76819668	76819815	-3553470	-	AluSx3	SINE	Alu	-59	252	97	1
716	2342	117	3	0	chr19	17284374	17284682	-41332934	-	AluSq2	SINE	Alu	-4	309	1	1
716	2133	123	0	10	chr19	17284682	17284975	-41332641	-	AluSz	SINE	Alu	-9	303	14	1
838	1743	179	3	27	chr19	33255453	33255750	-25361866	-	AluJr	SINE	Alu	-22	290	1	1
838	550	284	13	71	chr19	33255761	33256032	-25361584	-	L2b	LINE	L2	-181	3245	2979	1
846	1932	173	0	22	chr19	34335972	34336290	-24281326	-	AluJr	SINE	Alu	-1	311	1	1
666	1894	152	7	14	chr20	10700912	10701202	-53742965	-	AluSz	SINE	Alu	-24	288	1	2
666	2701	117	21	29	chr20	10701202	10701604	-53742563	+	LTR56	LTR	ERV1	42	439	-6	2
1070	2321	93	26	0	chr20	63613510	63613811	-830356	-	AluSx1	SINE	Alu	-3	309	1	2
641	2248	125	0	4	chrX	7354924	7355204	-148685691	-	AluSx	SINE	Alu	-33	279	1	4
714	2413	91	0	7	chrX	16954805	16955112	-139085783	-	AluSx1	SINE	Alu	-7	305	1	4
818	2119	112	3	23	chrX	30648070	30648373	-125392522	-	AluSx3	SINE	Alu	-13	298	2	4
681	1961	149	10	7	chrY	12668946	12669242	-44558173	-	AluSx3	SINE	Alu	-14	297	1	4
681	28	0	0	32	chrY	12669245	12669276	-44558139	+	(TTGTTTT)n	Simple_repeat	Simple_repeat	1	31	0	4
730	1341	172	0	0	chrY	19053925	19054129	-38173286	-	AluJb	SINE	Alu	-103	209	6	4
1223	2574	118	3	11	chr2	83739593	83739971	-158453558	-	THE1C	LTR	ERVL-MaLR	0	375	1	2
1223	9429	127	74	37	chr2	83739971	83741538	-158451991	-	THE1C-int	LTR	ERVL-MaLR	0	1631	3	2
1355	2134	96	16	9	chr2	100978010	100978326	-141215203	-	L1PB2	LINE	L1	0	6151	5834	2
2112	1407	262	183	112	chr2	200170589	200171466	-42022063	+	L2	LINE	L2	1967	2920	-499	2
2053	12283	147	10	3	chr3	192542172	192544065	-5751494	-	L1MA3	LINE	L1	-5099	2466	561	2
608	357	319	29	73	chr5	3075417	3075637	-178462622	+	Tigger16a	DNA	TcMar-Tigger	82	291	-666	3
1937	322	327	82	0	chr5	177330131	177330287	-4207972	+	MER5B	DNA	hAT-Charlie	6	175	-3	3
743	613	205	35	129	chr6	20810100	20810324	-149995655	-	L1MC5	LINE	L1	-5	9299	9098	3
1873	1577	219	12	52	chr6	168860314	168860734	-1945245	+	MER57B2	LTR	ERV1	1	403	0	3
784	1910	145	0	17	chr8	26098261	26098551	-119040085	-	AluJb	SINE	Alu	-27	285	1	3
784	1171	198	104	39	chr8	26098552	26098910	-119039726	+	LTR52	LTR	ERVL	15	398	-23	3
1313	14	164	73	0	chr9	95462984	95463025	-42931692	+	(CACC)n	Simple_repeat	Simple_repeat	1	44	0	4
1581	638	277	124	0	chr11	130603884	130604068	-4482554	+	MIRb	SINE	MIR	16	225	-43	7
1357	3833	244	98	15	chr15	101297143	101298901	-692288	-	L1ME3A	LINE	L1	0	6173	4203	1
717	1931	87	19	4	chr17	17362888	17363140	-65894301	-	AluSx1	SINE	Alu	-6	306	51	1
717	341	218	170	0	chr17	17363161	17363303	-65894138	+	L2	LINE	L2	2730	2900	-519	1
838	1786	227	135	23	chr17	33200302	33201305	-50056136	+	L2a	LINE	L2	2275	3425	-1	1
594	5955	99	13	19	chr18	1204732	1205105	-79168180	-	L1PB1	LINE	L1	0	6867	6499	1
591	2337	110	7	0	chr9	880444	880753	-137513964	+	AluSx	SINE	Alu	1	311	-1	4
591	5078	216	62	77	chr9	880753	880956	-137513761	-	Charlie1a	DNA	hAT-Charlie	-1261	194	1	4
1275	2015	152	3	3	chr5	90493243	90493546	-91044713	-	AluJb	SINE	Alu	-9	303	1	3
603	1877	166	10	3	chr6	2413679	2413974	-168392005	-	AluJo	SINE	Alu	-13	299	3	3
1143	2174	133	0	0	chr7	73216563	73216864	-86129109	-	AluSx	SINE	Alu	-10	302	2	3
1155	2141	133	0	0	chr7	74769958	74770258	-84575715	-	AluSx	SINE	Alu	-11	301	2	3
591	983	182	0	12	chr9	846579	846744	-137547973	-	AluJo	SINE	Alu	-13	299	137	4
767	2047	119	14	11	chr15	23937619	23937928	-78053261	-	AluSc	SINE	Alu	0	309	3	1
767	4818	239	82	41	chr15	23937928	23938862	-78052327	-	L1MC3	LINE	L1	-819	6966	6018	1
970	1934	179	3	3	chr15	50467555	50467856	-51523333	-	AluJb	SINE	Alu	-11	301	1	1
587	2146	132	3	0	chr18	372414	372716	-80000569	-	AluJo	SINE	Alu	-9	303	1	1
1334	2112	327	89	37	chr1	98173093	98174137	-150782285	+	L2c	LINE	L2	713	1819	-1600	1
1751	5817	101	14	5	chr2	152838931	152839849	-89353680	-	L1PB3	LINE	L1	-1	6153	5231	2
2397	557	329	147	17	chr2	237597391	237598155	-4595374	+	L2	LINE	L2	1890	2769	-650	2
2397	557	329	147	17	chr2	237597391	237598155	-4595374	+	L2	LINE	L2	1890	2769	-650	2
655	1062	260	44	65	chr3	9194823	9194970	-189100589	+	LTR16A1	LTR	ERVL	18	159	-297	2
655	1705	219	69	2	chr3	9194970	9195377	-189100182	-	MER63B	DNA	hAT-Blackjack	0	436	1	2
634	1141	272	64	14	chr5	6544506	6544938	-174993321	+	MLT1C	LTR	ERVL-MaLR	13	467	0	3
1475	222	341	74	0	chr10	116783518	116783644	-17013778	+	L2a	LINE	L2	2719	2854	-565	5
1335	1682	197	44	63	chr15	98402817	98403191	-3587998	-	MLT1B	LTR	ERVL-MaLR	-16	374	3	1
1657	21	242	0	87	chr5	140639333	140639436	-40898823	+	(GCCCC)n	Simple_repeat	Simple_repeat	1	103	0	3
1632	16	56	108	0	chr9	137295861	137295898	-1098819	+	(CCCTCGG)n	Simple_repeat	Simple_repeat	1	41	0	4
1632	36	49	0	0	chr9	137295934	137295977	-1098740	+	(CCCCGCCGT)n	Simple_repeat	Simple_repeat	1	43	0	4
1632	16	56	108	0	chr9	137295861	137295898	-1098819	+	(CCCTCGG)n	Simple_repeat	Simple_repeat	1	41	0	4
1632	36	49	0	0	chr9	137295934	137295977	-1098740	+	(CCCCGCCGT)n	Simple_repeat	Simple_repeat	1	43	0	4
1379	2413	86	0	13	chr10	104180441	104180745	-29616677	-	AluSc8	SINE	Alu	-8	303	4	5
1379	609	278	57	88	chr10	104180745	104180802	-29616620	+	L2a	LINE	L2	1844	1895	-1524	5
1379	1990	297	107	32	chr10	104180804	104182018	-29615404	+	L2a	LINE	L2	2129	3426	0	5
1008	897	86	0	179	chr14	55524356	55524429	-51519289	+	L1MA3	LINE	L1	7569	7619	-104	1
1008	2497	96	0	0	chr14	55524429	55524722	-51518996	-	AluSc	SINE	Alu	-16	293	1	1
1361	2759	33	0	0	chr15	101746383	101746690	-244499	+	AluY	SINE	Alu	2	308	-3	1
1028	6886	36	1	7	chr1	58150686	58151502	-190804920	-	L1PA5	LINE	L1	0	6154	5344	1
1160	196	307	177	16	chr7	75419868	75420318	-83925655	+	L2a	LINE	L2	438	975	-2444	3
1541	57	158	0	10	chr11	125346743	125346847	-9739775	+	GA-rich	Low_complexity	Low_complexity	1	104	0	7
754	423	239	193	0	chr16	22155385	22155519	-68182826	+	L3	LINE	CR1	3931	4096	-3	1
754	423	239	193	0	chr16	22155385	22155519	-68182826	+	L3	LINE	CR1	3931	4096	-3	1
1613	1569	172	100	22	chr11	134840545	134840877	-245745	+	L1M2	LINE	L1	5431	5789	-2253	7
2362	1029	184	123	64	chr2	232933151	232933273	-9260256	-	MLT1A0	LTR	ERVL-MaLR	-227	138	2	2
2413	2229	259	100	10	chr2	239695804	239696622	-2496907	-	L1MD2	LINE	L1	-15	6344	5445	2
605	9990	134	15	8	chr3	2648272	2649846	-195645713	+	Tigger1	DNA	TcMar-Tigger	3	1588	-830	2
1196	516	274	221	19	chr10	80160569	80161591	-53635831	+	L2a	LINE	L2	2113	3426	0	4
680	6250	56	8	0	chrY	12474002	12474749	-44752666	-	HERVE_a-int	LTR	ERV1	-1894	5953	5201	4
2032	1105	155	0	0	chr2	189728437	189728598	-52464931	-	AluJo	SINE	Alu	-12	300	140	2
593	1671	201	3	3	chr3	1089188	1089472	-197206087	-	AluJb	SINE	Alu	-26	286	3	2
593	1946	256	330	65	chr3	1089472	1089837	-197205722	-	L1ME1	LINE	L1	-717	5462	5034	2
593	1671	201	3	3	chr3	1089188	1089472	-197206087	-	AluJb	SINE	Alu	-26	286	3	2
593	1946	256	330	65	chr3	1089472	1089837	-197205722	-	L1ME1	LINE	L1	-717	5462	5034	2
603	1463	225	32	35	chr5	2381326	2381699	-179156560	-	MLT1A	LTR	ERVL-MaLR	0	374	3	3
1579	1880	133	44	0	chr11	130373416	130373701	-4712921	-	AluSx	SINE	Alu	-10	302	5	7
1579	1459	295	84	97	chr11	130373701	130373847	-4712775	-	LTR78	LTR	ERV1	-79	1225	1074	7
1242	1123	221	18	29	chr16	86138522	86138794	-4199551	-	MLT1A	LTR	ERVL-MaLR	0	374	106	1
1070	1038	166	304	14	chr20	63635721	63636009	-808158	-	MLT1A1	LTR	ERVL-MaLR	0	408	1	2
1717	802	269	44	0	chrX	148436776	148436995	-7603900	+	MIR	SINE	MIR	10	238	-24	4
1524	285	320	98	26	chr10	123094164	123094315	-10703107	-	MIRb	SINE	MIR	-90	178	16	5
816	3641	236	97	49	chr16	30360744	30361004	-59977341	+	L2a	LINE	L2	1538	1820	-1599	1
816	2183	102	7	26	chr16	30361004	30361307	-59977038	+	AluSx1	SINE	Alu	3	299	-13	1
637	14	125	0	0	chr3	6861355	6861381	-191434178	+	(CGC)n	Simple_repeat	Simple_repeat	1	26	0	2
652	4365	112	177	234	chr5	8840276	8841624	-172696635	+	LTR12D	LTR	ERV1	1	1254	0	3
667	2046	145	0	0	chr8	10790922	10791211	-134347425	-	AluSx3	SINE	Alu	-22	289	1	3
1150	217	324	86	17	chr15	74099315	74099488	-27891701	+	L2b	LINE	L2	2916	3101	-274	1
1150	217	324	86	17	chr15	74099315	74099488	-27891701	+	L2b	LINE	L2	2916	3101	-274	1
1877	919	224	50	16	chr6	169395233	169395482	-1410497	+	LTR34	LTR	ERV1	442	699	0	3
1243	485	263	124	48	chr2	86304765	86304973	-155888556	+	MLT1O	LTR	ERVL-MaLR	133	358	-184	2
2126	592	276	171	22	chr2	202053394	202053909	-40139620	+	L2a	LINE	L2	2801	3426	0	2
1485	703	344	134	64	chr10	117982698	117983373	-15814049	+	L2a	LINE	L2	2413	3174	-252	5
1493	2222	93	16	7	chr10	119085046	119085348	-14712074	+	AluSx1	SINE	Alu	2	306	-6	5
1493	219	356	25	17	chr10	119085392	119085512	-14711910	+	L2c	LINE	L2	3076	3196	-191	5
820	1437	144	10	107	chr15	30802707	30802935	-71188254	-	AluJb	SINE	Alu	0	312	110	1
1235	255	319	71	0	chr15	85200035	85200128	-16791061	-	MIR3	SINE	MIR	-100	168	65	1
2287	1929	135	7	24	chr1	223090381	223090669	-25865753	-	AluJr	SINE	Alu	-29	283	1	3
2027	709	203	0	24	chr2	189040162	189040285	-53153244	-	FLAM_A	SINE	Alu	-21	121	2	2
2372	247	347	10	0	chr2	234307993	234308091	-7885438	+	MamSINE1	SINE	tRNA-RTE	59	157	-133	2
686	420	315	96	31	chr3	13246778	13247251	-185048308	+	LTR82A	LTR	ERVL	325	866	-6	2
2084	944	184	0	0	chr3	196484473	196484647	-1810912	-	AluJb	SINE	Alu	0	312	135	2
2084	1791	181	3	10	chr3	196484656	196484955	-1810604	-	AluJr4	SINE	Alu	-15	297	1	2
1268	19175	178	22	20	chr5	89652283	89653216	-91885043	+	L1MA1	LINE	L1	16	953	-6612	3
1659	870	224	0	0	chr5	140780698	140780850	-40757409	-	FRAM	SINE	Alu	-24	152	1	3
1659	3173	230	90	57	chr5	140780850	140781516	-40756743	-	L1MDa	LINE	L1	-5206	1427	752	3
611	323	286	116	116	chr6	3507763	3508143	-167297836	-	LTR33	LTR	ERVL	-2	513	134	3
627	1675	146	47	68	chr6	5634301	5634609	-165171370	-	AluJo	SINE	Alu	-11	301	1	3
1158	1804	149	28	28	chr7	75145869	75146158	-84199815	-	AluJr	SINE	Alu	-23	289	1	3
1384	658	336	57	20	chr7	104782530	104782882	-54563091	+	L2c	LINE	L2	2699	3064	-355	3
766	926	174	0	0	chr8	23792812	23792944	-121345692	-	FLAM_A	SINE	Alu	-10	132	1	3
1348	274	331	65	72	chr8	100010947	100011302	-45127334	-	L2c	LINE	L2	-246	3141	2797	3
1348	785	216	85	10	chr8	100011353	100011549	-45127087	+	L2	LINE	L2	2694	2905	-514	3
1315	1027	275	59	67	chr9	95812534	95812793	-42581924	-	HAL1	LINE	L1	-160	2347	2101	4
931	186	324	84	44	chr11	45455452	45455772	-89630850	+	L2c	LINE	L2	2253	2586	-833	6
1020	2219	125	0	0	chr14	57052132	57052429	-49991289	-	AluSz	SINE	Alu	-14	298	2	1
1020	1077	141	200	70	chr14	57052444	57052685	-49991033	-	AluJr4	SINE	Alu	-31	281	2	1
830	2096	121	4	0	chr15	32214988	32215294	-69775895	-	AluSq	SINE	Alu	0	313	3	1
1181	929	112	8	22	chr15	78157827	78157961	-23833228	-	FLAM_C	SINE	Alu	-10	133	2	1
1307	155	259	15	17	chr15	94667111	94667574	-7323615	+	(TCCACC)n	Simple_repeat	Simple_repeat	1	470	0	1
1337	1925	164	3	7	chr15	98676937	98677236	-3313953	-	AluJr	SINE	Alu	-14	298	1	1
1337	544	345	78	106	chr15	98677236	98677449	-3313740	-	L1ME4a	LINE	L1	-1792	4354	4161	1
1361	2389	123	0	0	chr15	101716855	101717156	-274033	-	AluSz	SINE	Alu	-11	301	1	1
698	19	109	0	67	chr16	14923792	14923837	-75414508	+	G-rich	Low_complexity	Low_complexity	1	45	0	1
709	19	109	0	67	chr16	16322443	16322488	-74015857	+	G-rich	Low_complexity	Low_complexity	1	45	0	1
709	23	146	0	21	chr16	16362470	16362517	-73975828	+	(GGTGG)n	Simple_repeat	Simple_repeat	1	47	0	1
801	2369	91	23	0	chr16	28425040	28425336	-61913009	-	AluSc	SINE	Alu	-6	303	1	1
968	947	174	13	0	chr16	50271250	50271405	-40066940	-	AluJr	SINE	Alu	-19	293	137	1
702	510	311	84	15	chr17	15454715	15454943	-67802498	+	MIRc	SINE	MIR	8	254	-14	1
842	1669	181	11	14	chr17	33706236	33706523	-49550918	-	AluJb	SINE	Alu	-26	286	1	1
597	3435	98	2	4	chr18	1611340	1611811	-78761474	+	MER4A1	LTR	ERV1	3	472	0	1
928	1911	148	57	0	chr18	44959912	44960196	-35413089	-	AluSx1	SINE	Alu	-11	301	1	1
1166	2201	79	0	0	chr18	76245026	76245292	-4127993	-	AluSc	SINE	Alu	-43	266	1	1
752	1930	153	3	0	chr22	21902494	21902782	-28915686	-	AluJb	SINE	Alu	-23	289	1	2
1850	18	38	0	35	chr2	165896878	165896909	-76296620	+	(GTTT)n	Simple_repeat	Simple_repeat	1	29	0	2
1850	451	224	34	71	chr2	165897008	165897162	-76296367	+	MLT1J	LTR	ERVL-MaLR	291	438	-74	2
2092	11145	103	10	11	chr2	197590542	197592121	-44601408	-	LTR12C	LTR	ERV1	0	1579	3	2
2142	477	313	90	84	chr2	204142165	204142957	-38050572	+	L2b	LINE	L2	2584	3370	-5	2
2344	13	125	0	36	chr2	230668223	230668251	-11525278	+	(CCA)n	Simple_repeat	Simple_repeat	1	28	0	2
607	3223	160	14	0	chr3	2957435	2957986	-195337573	-	L1PA16	LINE	L1	-1	6165	5607	2
629	2170	254	16	55	chr3	5812900	5813272	-192482287	-	LTR80B	LTR	ERVL	-222	362	4	2
2039	3471	236	77	39	chr3	190637356	190638863	-7656696	-	L1ME2z	LINE	L1	-9	6435	4859	2
623	202	365	108	65	chr6	5030313	5030542	-165775437	+	L2b	LINE	L2	3127	3366	-9	3
786	35	0	0	0	chr8	26346117	26346149	-118792487	+	(TTA)n	Simple_repeat	Simple_repeat	1	32	0	3
1321	258	321	154	23	chr8	96554900	96555248	-48583388	+	L2a	LINE	L2	3025	3426	0	3
1638	14	225	0	23	chr9	138106310	138106353	-288364	+	(CCCTGC)n	Simple_repeat	Simple_repeat	1	43	0	4
1230	644	239	52	29	chr10	84576283	84576529	-49220893	+	Helitron1Nb_Mam	RC	Helitron	40	291	-825	4
1505	4109	149	64	26	chr10	120628651	120629408	-13168014	+	LTR48	LTR	ERV1	1	787	0	5
1472	13	78	35	33	chr11	116329048	116329077	-18757545	+	(GCCCA)n	Simple_repeat	Simple_repeat	1	30	0	7
1486	345	345	153	40	chr11	118130955	118131553	-16955069	+	L2	LINE	L2	1552	2229	-1190	7
781	414	298	26	7	chr15	25793497	25793649	-76197540	-	L1MEj	LINE	L1	-1492	668	514	1
861	29	115	21	0	chr15	36254991	36255062	-65736127	+	(TC)n	Simple_repeat	Simple_repeat	1	72	0	1
754	2205	117	0	3	chr16	22268677	22268967	-68069378	+	AluSx	SINE	Alu	5	293	-19	1
780	195	329	96	120	chr16	25653879	25654291	-64684054	+	L2b	LINE	L2	2943	3333	-54	1
790	1466	190	64	7	chr16	26949367	26949646	-63388699	+	AluJr	SINE	Alu	1	296	-16	1
790	1565	279	33	42	chr16	26949646	26949826	-63388519	+	L2a	LINE	L2	3261	3425	-1	1
981	334	335	65	56	chr16	51958090	51958602	-38379743	+	L2b	LINE	L2	2869	3375	0	1
928	412	316	95	40	chr17	45031309	45031556	-38225885	+	MIR	SINE	MIR	1	262	0	1
935	4484	86	28	0	chr18	45980213	45980806	-34392479	+	LTR71B	LTR	ERV1	1	610	0	1
939	229	341	12	12	chr18	46426229	46426315	-33946970	+	MIRc	SINE	MIR	42	127	-141	1
1166	196	314	55	83	chr18	76253410	76253542	-4119743	+	L2c	LINE	L2	3221	3348	-39	1
835	1564	226	137	81	chr19	32839571	32840167	-25777449	-	L1M8	LINE	L1	-712	1643	1058	1
1016	15	199	0	0	chr1	56499066	56499095	-192457327	+	(C)n	Simple_repeat	Simple_repeat	1	29	0	1
1318	385	300	244	13	chr2	96120084	96120845	-146072684	+	L2b	LINE	L2	1208	2214	-1205	2
1761	26555	43	1	3	chr2	154147919	154154081	-88039448	-	L1PA3	LINE	L1	-2	6153	4	2
2015	1156	131	31	108	chr2	187494045	187494294	-54699235	-	THE1B	LTR	ERVL-MaLR	-133	231	3	2
623	450	298	170	71	chr3	5096606	5096942	-193198617	+	LTR78	LTR	ERV1	25	400	-904	2
648	609	323	60	72	chr3	8311094	8311564	-189983995	+	L2c	LINE	L2	2922	3385	-2	2
1389	4700	117	50	38	chr3	105504111	105504931	-92790628	-	LTR1A2	LTR	ERV1	0	837	7	2
2078	54	298	59	16	chr3	195811472	195811654	-2483905	+	(CT)n	Simple_repeat	Simple_repeat	2	193	0	2
1272	849	283	103	82	chr5	90155883	90156597	-91381662	+	L2a	LINE	L2	2659	3405	-21	3
1168	18	253	0	0	chr8	76448507	76448549	-68690087	+	GA-rich	Low_complexity	Low_complexity	1	42	0	3
1461	404	281	181	13	chr10	114878036	114878260	-18919162	-	L1ME4a	LINE	L1	-71	6053	5784	5
798	592	264	144	82	chr16	28018198	28018660	-62319685	-	MLT1L	LTR	ERVL-MaLR	-16	594	27	1
968	266	302	23	0	chr16	50302419	50302505	-40035840	+	MER53	DNA	hAT	4	91	-102	1
968	18	101	0	29	chr16	50302546	50302580	-40035765	+	(CCCCA)n	Simple_repeat	Simple_repeat	1	34	0	1
968	234	312	138	7	chr16	50302582	50302727	-40035618	-	L1ME4b	LINE	L1	-4	888	722	1
929	12	239	61	0	chr17	45115299	45115348	-38142093	+	(CCCAC)n	Simple_repeat	Simple_repeat	1	52	0	1
929	29	115	0	0	chr17	45115363	45115410	-38142031	+	(CCT)n	Simple_repeat	Simple_repeat	1	47	0	1
1003	28	210	16	0	chr17	54808498	54808559	-28448882	+	(TC)n	Simple_repeat	Simple_repeat	1	62	0	1
1003	786	234	11	80	chr17	54808597	54808797	-28448644	+	MLT1A	LTR	ERVL-MaLR	189	374	0	1
1715	461	283	0	19	chr1	148161003	148161158	-100795264	-	U1	snRNA	snRNA	-10	155	4	2
2451	2607	224	60	105	chr1	244700969	244701719	-4254703	+	MLT1-int	LTR	ERVL-MaLR	430	1143	-228	3
2136	2136	127	7	0	chr2	203414101	203414401	-38779128	-	AluSz	SINE	Alu	-10	302	1	2
1666	13	140	47	44	chr5	141781917	141781960	-39756299	+	(CAGCCAG)n	Simple_repeat	Simple_repeat	1	45	0	3
1932	937	283	63	96	chr5	176632740	176633208	-4905051	+	MLT1N2	LTR	ERVL-MaLR	19	480	-82	3
1851	231	114	0	0	chr6	166002429	166002464	-4803515	+	MLT1J1	LTR	ERVL-MaLR	69	103	-341	3
767	6548	132	18	0	chr8	23943529	23945513	-121193123	-	L1PB3	LINE	L1	-6	6148	4136	3
1351	427	248	37	30	chr8	100423422	100423555	-44715081	-	LTR85c	LTR	Gypsy?	-673	150	17	3
790	18889	110	18	8	chr15	26989490	26990803	-75000386	-	L1MA2	LINE	L1	-2	7721	6412	1
1332	463	250	28	0	chr15	97979522	97979626	-4011563	+	MER81	DNA	hAT-Blackjack	7	113	-1	1
985	351	295	120	58	chr16	52479897	52480138	-37858207	+	L2c	LINE	L2	3107	3364	-23	1
1083	231	260	49	0	chr2	65277027	65277104	-176916425	-	MER5A	DNA	hAT-Charlie	0	189	109	2
1166	2264	158	82	24	chr7	76224649	76225109	-83120864	-	LTR22B	LTR	ERVK	-3	489	1	3
1580	12	286	0	50	chr11	130459841	130459901	-4626721	+	(CCCTTGC)n	Simple_repeat	Simple_repeat	1	60	0	7
1019	1634	169	19	4	chr17	56943863	56944129	-26313312	-	AluJb	SINE	Alu	-6	306	37	1
1019	583	233	358	76	chr17	56944129	56944310	-26313131	+	LTR83	LTR	ERVL	300	565	-215	1
754	4226	90	31	50	chr22	22235154	22235747	-28582721	+	LTR71B	LTR	ERV1	27	610	0	2
1042	524	336	101	0	chr1	59959007	59959284	-188997138	+	L2a	LINE	L2	1587	1894	-1525	1
1042	1631	128	2	4	chr1	59959330	59959580	-188996842	+	L1ME3G	LINE	L1	5564	5791	-360	1
1023	1882	187	1	53	chr2	57463667	57464058	-184729471	-	L1M3	LINE	L1	-465	5703	5324	1
634	982	258	55	9	chr3	6481309	6481728	-191813831	-	L1MEg	LINE	L1	-2869	3277	2839	2
2079	14	120	0	35	chr3	195898187	195898216	-2397343	+	(CTC)n	Simple_repeat	Simple_repeat	1	29	0	2
2079	460	302	45	13	chr3	195898270	195898421	-2397138	+	MIRb	SINE	MIR	32	187	-81	2
2086	4116	164	41	28	chr3	196794251	196795012	-1500547	+	L1M3f	LINE	L1	3	774	-4554	2
1139	541	320	60	97	chr6	72659814	72660087	-98145892	+	L2	LINE	L2	2581	2838	-581	3
1433	405	130	0	55	chr10	111184902	111184975	-22612447	+	Tigger2b_Pri	DNA	TcMar-Tigger	1	69	-999	5
1433	2015	137	85	93	chr10	111184965	111185172	-22612250	+	Tigger2	DNA	TcMar-Tigger	2273	2489	-229	5
1585	343	378	59	4	chr10	131089723	131089965	-2707457	-	ERVL-E-int	LTR	ERVL	-726	4941	4686	5
1351	1173	233	44	131	chr14	100429588	100430017	-6613701	-	MLT1B	LTR	ERVL-MaLR	0	390	1	1
1307	155	259	15	17	chr15	94667111	94667574	-7323615	+	(TCCACC)n	Simple_repeat	Simple_repeat	1	470	0	1
1319	2487	113	27	0	chr15	96281594	96281948	-5709241	+	THE1B	LTR	ERVL-MaLR	1	364	0	1
843	222	256	41	79	chr16	33912810	33912919	-56425426	-	L2c	LINE	L2	0	3387	3264	1
621	263	359	69	93	chr18	4804097	4804515	-75568770	+	L2c	LINE	L2	2972	3378	-9	1
1224	2074	103	0	6	chr2	83885765	83886077	-158307452	-	L1PB1	LINE	L1	-1	6150	5841	2
1935	613	289	114	41	chr2	177075663	177076078	-65117451	-	LTR33	LTR	ERVL	-66	449	1	2
2103	237	328	87	25	chr2	199020654	199020773	-43172756	-	L2c	LINE	L2	-8	3379	3253	2
2103	627	284	122	0	chr2	199020859	199021060	-43172469	+	MIRb	SINE	MIR	29	257	-11	2
609	12	230	27	0	chr6	3159737	3159774	-167646205	+	(ACCCCC)n	Simple_repeat	Simple_repeat	1	38	0	3
745	419	317	117	61	chr6	21101523	21102080	-149703899	+	L2	LINE	L2	2240	2831	-588	3
1298	17	171	0	47	chr9	93576341	93576384	-44818333	+	(CGG)n	Simple_repeat	Simple_repeat	1	43	0	4
1480	703	210	194	0	chr11	117330782	117330982	-17755640	-	MIR	SINE	MIR	-2	260	13	7
1543	900	221	12	6	chr11	125675031	125675199	-9411423	-	MER5B	DNA	hAT-Charlie	-9	169	1	7
761	3909	163	16	15	chr13	23151035	23151719	-91212609	-	L1MA6	LINE	L1	-1	6299	5615	9
1037	355	319	83	36	chr14	59317614	59317836	-47725882	-	MIRb	SINE	MIR	-23	245	2	1
1037	193	356	65	0	chr14	59317889	59317990	-47725728	+	MER5B	DNA	hAT-Charlie	69	176	-2	1
1347	245	212	15	0	chr14	99953206	99953272	-7090446	+	L2-1_AMi	LINE	L2	291	357	-878	1
826	1242	251	154	35	chr15	31624887	31625375	-70365814	+	MLT1F2	LTR	ERVL-MaLR	4	560	0	1
1319	391	284	80	16	chr15	96225914	96226055	-5765134	+	L2b	LINE	L2	3240	3425	-1	1
765	190	337	141	58	chr16	23714435	23714967	-66623378	+	L2	LINE	L2	563	1145	-2274	1
597	2460	86	0	0	chr17	1617386	1617690	-81639751	-	AluSx1	SINE	Alu	-8	304	1	1
715	1843	300	82	89	chr17	17093927	17094619	-66162822	-	HAL1	LINE	L1	-590	1917	1269	1
725	326	253	114	47	chr17	18435134	18435359	-64822082	+	L2b	LINE	L2	3178	3414	-12	1
690	1760	217	69	0	chr18	13877641	13878060	-66495225	-	L1MB7	LINE	L1	-439	5745	5296	1
1424	568	91	22	0	chrX	110066873	110066961	-45973934	-	MER53	DNA	hAT	-98	95	6	4
755	314	156	15	45	chrY	22389130	22389197	-34838218	+	MER1B	DNA	hAT-Charlie	262	326	-13	4
758	312	162	14	68	chrY	22770947	22771020	-34456395	+	MER1B	DNA	hAT-Charlie	258	326	-13	4
761	2119	148	21	3	chrY	23111539	23111870	-34115545	-	L1PB3	LINE	L1	-1	6153	5817	4
771	312	162	14	68	chrY	24404690	24404763	-32822652	+	MER1B	DNA	hAT-Charlie	258	326	-13	4
773	1976	151	3	3	chrY	24745258	24745583	-32481832	-	L1PB3	LINE	L1	-1	6153	5829	4
1018	19	203	0	21	chr1	56761775	56761823	-192194599	+	(CTCC)n	Simple_repeat	Simple_repeat	1	48	0	1
1337	1525	210	11	31	chr1	98588267	98588557	-150367865	-	AluJr4	SINE	Alu	-27	285	2	1
1337	6224	182	20	48	chr1	98588557	98588651	-150367771	+	Tigger2	DNA	TcMar-Tigger	1432	1523	-1195	1
923	2268	104	13	7	chr2	44345352	44345649	-197847880	-	AluSx1	SINE	Alu	-13	299	1	1
1051	2316	62	0	34	chr2	61196069	61196389	-180997140	-	AluY	SINE	Alu	0	311	1	2
1051	1820	180	0	3	chr2	61196389	61196524	-180997005	-	AluJb	SINE	Alu	-177	135	1	2
1214	1514	209	3	60	chr2	82475160	82475456	-159718073	-	AluJo	SINE	Alu	-30	282	1	2
1234	848	182	0	0	chr2	85196537	85196669	-156996860	-	FLAM_C	SINE	Alu	-11	132	1	2
1234	505	208	153	51	chr2	85196669	85196723	-156996806	+	MER5B	DNA	hAT-Charlie	127	176	-2	2
1245	78	63	14	53	chr2	86580731	86580879	-155612650	+	(TAGA)n	Simple_repeat	Simple_repeat	1	150	0	2
1245	626	165	0	0	chr2	86580888	86580973	-155612556	-	AluJr	SINE	Alu	-225	87	3	2
1245	9440	147	70	90	chr2	86580973	86581730	-155611799	+	L1MDa	LINE	L1	4228	4991	-1546	2
1320	887	173	0	0	chr2	96463330	96463463	-145730066	-	FLAM_C	SINE	Alu	-10	133	1	2
1320	1368	211	70	65	chr2	96463463	96463750	-145729779	-	Tigger17c	DNA	TcMar-Tigger	-882	306	2	2
1381	2328	90	10	7	chr2	104352634	104352935	-137840594	-	AluY	SINE	Alu	-9	302	1	2
1383	1605	186	0	93	chr2	104602067	104602401	-137591128	-	AluJr	SINE	Alu	-9	303	1	2
1383	6677	223	66	17	chr2	104602401	104603433	-137590096	+	L1MDa	LINE	L1	1318	2377	-4256	2
1396	2441	111	0	3	chr2	106347076	106347382	-135846147	-	AluSz	SINE	Alu	-7	305	1	2
1396	5986	107	54	10	chr2	106347382	106348913	-135844616	-	L1PA16	LINE	L1	-134	6032	4445	2
1437	1539	162	0	0	chr2	111758784	111759012	-130434517	-	AluJb	SINE	Alu	-84	228	1	2
1437	1573	218	94	5	chr2	111759012	111759400	-130434129	+	L1MD2	LINE	L1	6318	6743	-7	2
1752	2226	129	0	0	chr2	153082821	153083124	-89110405	-	AluSg	SINE	Alu	-5	305	3	2
1752	19725	124	14	28	chr2	153083127	153084473	-89109056	-	L1PB1	LINE	L1	-415	6452	5139	2
1754	18172	155	20	24	chr2	153278225	153282434	-88911095	-	L1PA16	LINE	L1	-863	5986	1791	2
1754	1783	196	0	7	chr2	153282434	153282715	-88910814	-	AluJb	SINE	Alu	-33	279	1	2
1841	2028	163	7	3	chr2	164725412	164725718	-77467811	-	AluJb	SINE	Alu	-5	307	1	2
1941	1999	147	27	3	chr2	177800177	177800470	-64393059	-	AluJr	SINE	Alu	-12	300	1	2
1970	1502	173	45	35	chr2	181589838	181590121	-60603408	-	AluJb	SINE	Alu	-26	286	1	2
1993	2388	104	0	0	chr2	184561709	184562017	-57631512	-	AluSx4	SINE	Alu	-2	308	1	2
1993	7102	107	8	6	chr2	184562017	184562310	-57631219	+	HERVL-int	LTR	ERVL	5363	5653	-1	2
2008	1574	168	52	29	chr2	186536840	186537120	-55656409	-	AluJr	SINE	Alu	-25	287	1	2
2008	3904	133	9	75	chr2	186537120	186537556	-55655973	-	L1MC1	LINE	L1	-248	6260	5838	2
2039	1297	175	127	20	chr2	190698484	190698771	-51494758	-	AluJo	SINE	Alu	0	312	1	2
2085	2241	115	7	0	chr2	196633888	196634184	-45559345	-	AluSx	SINE	Alu	-14	298	1	2
2085	2653	158	51	109	chr2	196634184	196634412	-45559117	+	MER6A	DNA	TcMar-Tigger	378	605	0	2
2119	1779	165	17	3	chr2	201090439	201090724	-41102805	-	AluJb	SINE	Alu	-23	289	1	2
2119	1008	249	122	122	chr2	201090724	201090953	-41102576	+	Charlie7	DNA	hAT-Charlie	364	616	-1996	2
2128	2045	148	0	7	chr2	202319950	202320255	-39873274	-	AluJb	SINE	Alu	-9	303	1	2
2128	701	129	0	148	chr2	202320261	202320416	-39873113	-	FLAM_C	SINE	Alu	-11	132	1	2
2133	1291	178	112	4	chr2	202993778	202993922	-39199607	-	AluJr	SINE	Alu	-160	152	2	2
2133	474	320	109	0	chr2	202993939	202994111	-39199418	-	MIRb	SINE	MIR	-47	221	29	2
2136	2209	133	0	9	chr2	203301911	203302226	-38891303	-	AluSz	SINE	Alu	0	312	1	2
2349	1876	155	3	23	chr2	231313744	231314054	-10879475	-	AluJb	SINE	Alu	-3	309	6	2
2349	2405	90	6	0	chr2	231314066	231314377	-10879152	-	AluSp	SINE	Alu	0	313	1	2
2367	2160	132	0	7	chr2	233669679	233669983	-8523546	-	AluSx3	SINE	Alu	-8	303	2	2
2367	4121	154	33	31	chr2	233669983	233670709	-8522820	-	Tigger2	DNA	TcMar-Tigger	-60	2658	1911	2
613	2192	110	0	0	chr3	3757475	3757765	-194537794	-	AluSc5	SINE	Alu	-12	297	8	2
624	2211	107	7	3	chr3	5227054	5227345	-193068214	-	AluSq2	SINE	Alu	-21	292	1	2
663	2296	89	0	26	chr3	10228936	10229240	-188066319	-	AluSx	SINE	Alu	-16	296	1	2
674	2458	82	3	13	chr3	11727770	11728086	-186567473	-	AluSp	SINE	Alu	0	313	1	2
674	245	149	21	0	chr3	11728093	11728140	-186567419	+	L1MD2	LINE	L1	6297	6344	-15	2
697	2082	107	0	0	chr3	14760603	14760873	-183534686	-	AluSx4	SINE	Alu	-6	304	35	2
697	389	305	47	9	chr3	14760873	14760985	-183534574	-	L1ME4a	LINE	L1	-331	5793	5679	2
978	2248	116	7	0	chr3	51589987	51590289	-146705270	-	AluSz	SINE	Alu	-7	305	2	2
1130	833	188	57	6	chr3	71498734	71498900	-126796659	-	MER5A	DNA	hAT-Charlie	-14	175	1	2
1400	1931	164	10	0	chr3	106943963	106944262	-91351297	-	AluJb	SINE	Alu	-10	302	1	2
2073	2211	98	0	0	chr3	195049060	195049356	-3246203	-	AluSx4	SINE	Alu	-14	296	1	2
2073	1726	173	86	10	chr3	195049356	195049453	-3246106	-	MER63B	DNA	hAT-Blackjack	-327	109	8	2
595	1735	171	0	49	chr4	1389678	1389824	-188824731	-	AluJr4	SINE	Alu	-179	133	1	2
595	9176	175	84	40	chr4	1389824	1390298	-188824257	-	L1MB8	LINE	L1	-2829	3317	2823	2
1211	1887	92	32	99	chr4	82145214	82145517	-108069038	-	AluSx1	SINE	Alu	-30	282	1	2
1211	2091	44	37	39	chr4	82145517	82145797	-108068758	-	L1PA10	LINE	L1	-676	5492	5217	2
585	1659	115	167	0	chr5	44313	44573	-181493686	-	AluSx	SINE	Alu	0	312	1	3
629	1887	181	23	26	chr5	5822998	5823308	-175714951	-	AluJr	SINE	Alu	-3	309	1	3
666	2282	124	0	16	chr5	10687900	10688215	-170850044	-	AluSz6	SINE	Alu	-2	310	1	3
666	14021	112	30	18	chr5	10688215	10688572	-170849687	+	Tigger1	DNA	TcMar-Tigger	2066	2418	0	3
1271	2311	120	0	0	chr5	89980351	89980651	-91557608	-	AluSx	SINE	Alu	-12	300	1	3
1271	337	298	31	60	chr5	89980651	89980735	-91557524	-	MER117	DNA	hAT-Charlie	-109	88	4	3
1446	1947	164	7	23	chr5	112881771	112882070	-68656189	-	AluJb	SINE	Alu	-18	294	1	3
1446	2715	241	162	33	chr5	112882070	112882634	-68655625	+	L2a	LINE	L2	765	1415	-2004	3
1664	2268	101	0	13	chr5	141450829	141451127	-40087132	-	AluSx3	SINE	Alu	-17	294	1	3
1664	19	23	75	70	chr5	141451127	141451142	-40087117	+	(ATTT)n	Simple_repeat	Simple_repeat	2	16	0	3
1667	2444	112	0	0	chr5	141854659	141854971	-39683288	-	AluSq2	SINE	Alu	-1	312	1	3
1667	1918	154	0	14	chr5	141854977	141855270	-39682989	-	AluJb	SINE	Alu	-19	293	5	3
1937	1428	224	14	4	chr5	177217934	177218211	-4320048	-	AluJb	SINE	Alu	-31	281	2	3
621	1951	197	0	0	chr6	4797963	4798272	-166007707	-	AluJb	SINE	Alu	-3	309	1	3
621	316	235	220	8	chr6	4798274	4798531	-166007448	-	L1MEi	LINE	L1	-624	1588	1262	3
634	655	219	8	0	chr6	6529777	6529900	-164276079	-	AluJr	SINE	Alu	-188	124	1	3
634	2043	218	85	52	chr6	6529902	6530401	-164275578	-	MLT1F2	LTR	ERVL-MaLR	-43	517	1	3
1138	2311	115	7	0	chr6	72538901	72539206	-98266773	-	AluSx	SINE	Alu	-5	307	1	3
1138	5157	210	17	33	chr6	72539206	72540724	-98265255	-	L1MA5	LINE	L1	-581	6740	6038	3
1351	2126	127	7	7	chr6	100422210	100422502	-70383477	-	AluSx1	SINE	Alu	-20	292	1	3
1793	2290	78	0	3	chr6	158365869	158366202	-12439777	-	AluY	SINE	Alu	0	311	1	3
1148	2066	147	7	19	chr7	73799850	73800162	-85545811	-	AluJo	SINE	Alu	-3	309	2	3
1148	2388	74	0	0	chr7	73800168	73800451	-85545522	-	AluSg	SINE	Alu	-19	291	9	3
1150	1779	143	83	0	chr7	74184694	74184980	-85160993	-	AluSz	SINE	Alu	0	312	1	3
1150	1835	158	6	6	chr7	74184980	74185291	-85160682	-	AluJr	SINE	Alu	0	312	2	3
1151	2147	118	0	3	chr7	74292398	74292687	-85053286	-	AluSz	SINE	Alu	-24	288	1	3
1151	273	312	98	48	chr7	74292687	74292782	-85053191	-	MIR	SINE	MIR	-54	208	107	3
1153	2233	127	0	13	chr7	74552821	74553137	-84792836	-	AluSz	SINE	Alu	0	312	1	3
1153	1076	140	41	6	chr7	74553137	74553295	-84792678	-	AluSx	SINE	Alu	-13	299	135	3
1166	1814	146	0	48	chr7	76211857	76212152	-83133821	-	AluJb	SINE	Alu	-30	282	2	3
1166	1714	160	50	31	chr7	76212162	76212455	-83133518	-	AluJb	SINE	Alu	-12	300	2	3
1323	1625	189	29	13	chr7	96826195	96826501	-62519472	-	AluJb	SINE	Alu	0	312	2	3
1373	705	193	0	8	chr7	103305439	103305558	-56040415	-	AluJb	SINE	Alu	-194	118	1	3
1383	2016	166	7	0	chr7	104704628	104704929	-54641044	-	AluJb	SINE	Alu	-3	309	7	3
1383	568	301	111	56	chr7	104704929	104705297	-54640676	-	L1MEj	LINE	L1	-886	1274	887	3
651	1836	138	7	11	chr8	8659129	8659398	-136479238	-	AluSx3	SINE	Alu	-43	268	1	3
651	2154	281	93	44	chr8	8659398	8659783	-136478853	+	L1MEc	LINE	L1	2038	2417	-3998	3
651	2234	135	3	0	chr8	8777338	8777649	-136360987	-	AluSx1	SINE	Alu	0	312	1	3
651	1993	147	103	53	chr8	8777649	8777687	-136360949	+	MSTA	LTR	ERVL-MaLR	395	427	-1	3
653	1948	132	50	3	chr8	9031755	9032043	-136106593	-	AluSz	SINE	Alu	-10	302	1	3
662	2213	106	3	0	chr8	10141955	10142257	-134996379	-	AluSp	SINE	Alu	-10	303	1	3
662	362	301	72	34	chr8	10142257	10142461	-134996175	-	MIRb	SINE	MIR	-16	214	3	3
751	1979	181	3	0	chr8	21765100	21765410	-123373226	-	AluJb	SINE	Alu	-1	311	1	3
761	2230	125	0	13	chr8	23124294	23124607	-122014029	-	AluSz6	SINE	Alu	-3	309	1	3
761	2270	97	10	3	chr8	23124609	23124908	-122013728	-	AluSp	SINE	Alu	-12	301	1	3
765	824	182	0	0	chr8	23712564	23712690	-121425946	-	FLAM_C	SINE	Alu	-17	126	1	3
784	1969	138	3	53	chr8	26134560	26134879	-119003757	-	AluSx	SINE	Alu	-9	303	1	3
785	1962	160	0	7	chr8	26264148	26264441	-118874195	-	AluSx	SINE	Alu	-21	291	1	3
792	1392	186	0	36	chr8	27199601	27199853	-117938783	-	AluJr	SINE	Alu	-30	282	40	3
793	2028	102	4	51	chr8	27383264	27383558	-117755078	-	AluSg	SINE	Alu	-30	280	1	3
793	5883	154	16	136	chr8	27383558	27383695	-117754941	-	L1MA5	LINE	L1	-1663	4480	4372	3
816	1672	192	24	0	chr8	30286393	30286555	-114852081	-	AluJr	SINE	Alu	-18	294	129	3
1116	2065	147	3	0	chr8	69607369	69607661	-75530975	-	AluJb	SINE	Alu	-17	295	3	3
1303	2370	114	7	3	chr8	94202173	94202470	-50936166	-	AluSz6	SINE	Alu	-14	298	1	3
1319	1959	150	3	22	chr8	96314032	96314346	-48824290	-	AluJb	SINE	Alu	-4	308	1	3
1323	2161	124	3	3	chr8	96800976	96801275	-48337361	-	AluSz6	SINE	Alu	-13	299	1	3
1348	2132	95	34	56	chr8	100101286	100101592	-45037044	-	AluSc8	SINE	Alu	-12	299	1	3
1353	2297	102	0	3	chr8	100773840	100774133	-44364503	-	AluSx1	SINE	Alu	-20	292	1	3
1353	346	279	98	0	chr8	100774137	100774248	-44364388	-	L1M5	LINE	L1	-852	5294	5172	3
1356	1648	181	14	7	chr8	101151322	101151598	-43987038	-	AluJr	SINE	Alu	-22	290	13	3
1356	655	285	80	61	chr8	101151598	101151761	-43986875	+	L2a	LINE	L2	3263	3426	0	3
1484	1825	159	10	17	chr8	117919193	117919489	-27219147	-	AluJo	SINE	Alu	-18	294	1	3
1484	1793	195	3	0	chr8	117919506	117919803	-27218833	-	AluJr	SINE	Alu	-14	298	1	3
592	2197	112	0	3	chr9	1016242	1016537	-137378180	-	AluSx	SINE	Alu	-18	294	1	4
592	2015	150	0	0	chr9	1016546	1016833	-137377884	-	AluSx	SINE	Alu	-25	287	1	4
611	1735	177	4	24	chr9	3448531	3448819	-134945898	-	AluJr	SINE	Alu	-30	282	1	4
642	932	143	15	0	chr9	7570878	7571011	-130823706	-	AluJo	SINE	Alu	-176	136	2	4
653	2288	120	0	0	chr9	8921494	8921793	-129472924	-	AluSz	SINE	Alu	-13	299	1	4
653	213	306	109	130	chr9	8921793	8921845	-129472872	-	MER5A	DNA	hAT-Charlie	-136	53	1	4
1295	1633	160	18	43	chr9	93090049	93090331	-45304386	-	AluJr	SINE	Alu	-21	291	17	4
1307	1559	185	37	8	chr9	94660988	94661247	-43733470	-	AluJo	SINE	Alu	-37	275	9	4
1307	704	171	124	84	chr9	94661247	94661350	-43733367	-	LTR48B	LTR	ERV1	-387	235	137	4
1314	2126	127	7	0	chr9	95621180	95621479	-42773238	-	AluSx1	SINE	Alu	-11	301	1	4
1314	15187	117	30	19	chr9	95621479	95622383	-42772334	+	Tigger1	DNA	TcMar-Tigger	252	1173	-1245	4
1632	2084	163	0	13	chr9	137287591	137287904	-1106813	-	AluJo	SINE	Alu	-3	309	1	4
1196	2067	139	3	3	chr10	80116303	80116598	-53680824	-	AluSx	SINE	Alu	-17	295	1	4
1196	269	98	0	0	chr10	80116600	80116641	-53680781	+	MER92-int	LTR	ERV1	1780	1820	-2240	4
1210	1617	173	21	21	chr10	81928835	81929118	-51868304	-	AluJr	SINE	Alu	-21	291	9	4
1245	1927	123	77	0	chr10	86567287	86567563	-47229859	-	AluSz	SINE	Alu	-13	299	1	4
1245	5280	80	43	48	chr10	86567563	86567947	-47229475	-	MER4E1	LTR	ERV1	-260	521	128	4
1414	831	153	8	0	chr10	108778269	108778393	-25019029	-	AluSx	SINE	Alu	-187	125	1	5
1414	7285	113	44	2	chr10	108778394	108779849	-25017573	-	L1PA11	LINE	L1	-487	5687	4167	5
1425	2367	103	0	0	chr10	110215031	110215333	-23582089	-	AluSg	SINE	Alu	-2	308	7	5
1442	2450	86	0	0	chr10	112400382	112400706	-21396716	-	AluSg7	SINE	Alu	0	309	1	5
1442	1746	164	13	87	chr10	112400706	112400856	-21396566	-	AluJr	SINE	Alu	-179	133	2	5
1464	2174	119	3	0	chr10	115217094	115217387	-18580035	-	AluSq	SINE	Alu	-19	294	1	5
1493	1961	139	7	7	chr10	119072427	119072754	-14724668	-	AluSz	SINE	Alu	0	312	1	5
1496	1553	139	127	47	chr10	119522878	119523152	-14274270	-	AluJb	SINE	Alu	-13	299	1	5
1513	2343	110	0	0	chr10	121656485	121656793	-12140629	-	AluSc	SINE	Alu	-1	308	1	5
1513	774	245	62	0	chr10	121656794	121656945	-12140477	-	AluJo	SINE	Alu	-15	297	137	5
1534	2363	112	0	3	chr10	124487430	124487743	-9309679	-	AluSx1	SINE	Alu	0	312	1	5
923	800	129	0	9	chr11	44397305	44397421	-90689201	-	FLAM_C	SINE	Alu	-16	127	13	6
1497	1800	171	0	13	chr11	119538150	119538449	-15548173	-	AluJo	SINE	Alu	-17	295	1	7
1497	1924	199	63	7	chr11	119538449	119538853	-15547769	+	MSTB1	LTR	ERVL-MaLR	5	432	0	7
1508	2212	121	0	7	chr11	121079819	121080116	-14006506	-	AluSx	SINE	Alu	-17	295	1	7
1514	2097	117	14	4	chr11	121842853	121843134	-13243488	-	AluSq2	SINE	Alu	-29	284	1	7
1528	2287	118	0	0	chr11	123649707	123650003	-11436619	-	AluSq2	SINE	Alu	-17	296	1	7
1530	782	200	0	15	chr11	123919831	123919966	-11166656	-	FLAM_C	SINE	Alu	-10	133	1	7
1530	20	0	0	0	chr11	123919978	123920000	-11166622	+	(T)n	Simple_repeat	Simple_repeat	1	22	0	7
1102	883	219	0	19	chr12	67873258	67873445	-65401864	-	AluJr	SINE	Alu	0	312	137	8
1442	2280	119	0	7	chr12	112451862	112452172	-20823137	-	AluSx	SINE	Alu	-1	311	4	9
761	2463	80	3	0	chr13	23138334	23138622	-91225706	-	AluYk3	SINE	Alu	-4	307	19	9
761	687	304	65	78	chr13	23138632	23138965	-91225363	-	L1ME4a	LINE	L1	-245	5879	5545	9
764	2161	116	0	0	chr13	23485155	23485439	-90878889	-	AluSx1	SINE	Alu	-18	294	11	9
768	1480	197	47	10	chr13	24110918	24111208	-90253120	-	AluJo	SINE	Alu	-11	301	1	9
1001	2320	56	0	28	chr14	54561368	54561653	-52482065	-	AluSg	SINE	Alu	-14	296	20	1
1001	703	102	116	9	chr14	54561686	54561794	-52481924	+	FLAM_C	SINE	Alu	1	121	-22	1
1001	2240	119	0	11	chr14	54653353	54653639	-52390079	-	AluSz	SINE	Alu	-29	283	1	1
1020	1748	182	0	4	chr14	57139525	57139805	-49903913	-	AluJo	SINE	Alu	-23	289	11	1
1030	1775	205	0	3	chr14	58327675	58327972	-48715746	-	AluJo	SINE	Alu	-16	296	1	1
1078	1959	151	3	13	chr14	64641620	64641918	-42401800	-	AluJo	SINE	Alu	-14	298	4	1
1078	3485	129	18	2	chr14	64641921	64642465	-42401253	-	L1MC1	LINE	L1	-10	6323	5771	1
1355	849	111	17	0	chr14	100978187	100978304	-6065414	-	AluSx	SINE	Alu	-192	120	2	1
758	2232	93	27	0	chr15	22790422	22790713	-79200476	-	AluSp	SINE	Alu	-14	299	1	1
758	227	286	18	0	chr15	22790713	22790769	-79200420	-	L2a	LINE	L2	-20	3406	3350	1
760	2437	94	0	0	chr15	22997180	22997479	-78993710	-	AluSx	SINE	Alu	-13	299	1	1
760	391	248	2	0	chr15	22997479	22997581	-78993608	-	L1M5	LINE	L1	-1022	5124	5010	1
775	1813	161	3	31	chr15	24906114	24906431	-77084758	-	AluJb	SINE	Alu	-3	309	2	1
775	1248	240	107	31	chr15	24906431	24906641	-77084548	-	MER39	LTR	ERV1	-189	518	289	1
782	2188	139	0	0	chr15	25832973	25833282	-76157907	-	AluSz6	SINE	Alu	-3	309	1	1
856	1455	189	7	76	chr15	35619997	35620298	-66370891	-	AluJr	SINE	Alu	-32	280	1	1
917	1902	167	0	31	chr15	43550128	43550445	-58440744	-	AluJb	SINE	Alu	-5	307	1	1
969	1824	180	3	3	chr15	50363389	50363684	-51627505	-	AluJb	SINE	Alu	-17	295	1	1
969	606	190	42	42	chr15	50363684	50363799	-51627390	-	MER113	DNA	hAT-Charlie	-401	120	1	1
1149	1142	167	0	0	chr15	74004105	74004273	-27986916	-	FRAM	SINE	Alu	-8	168	1	1
1149	425	299	77	78	chr15	74004273	74004293	-27986896	-	L1M6	LINE	L1	-981	1738	1728	1
1195	2115	113	0	27	chr15	80039317	80039610	-21951579	-	AluSx1	SINE	Alu	-27	285	1	1
1195	408	343	0	0	chr15	80039610	80039712	-21951477	-	MER81	DNA	hAT-Blackjack	-12	102	1	1
1308	1646	203	0	16	chr15	94865938	94866244	-7124945	-	AluJr4	SINE	Alu	-10	302	2	1
1308	751	269	35	70	chr15	94866244	94866673	-7124516	-	L1MEc	LINE	L1	-4010	2390	1962	1
702	908	141	7	7	chr16	15394261	15394396	-74943949	-	AluJo	SINE	Alu	-175	137	3	1
704	335	194	15	15	chr16	15699196	15699263	-74639082	-	AluJo	SINE	Alu	-245	67	1	1
704	1299	153	0	19	chr16	15699263	15699478	-74638867	-	AluJb	SINE	Alu	-16	296	86	1
706	2131	115	33	3	chr16	15930658	15930954	-74407391	-	AluSx	SINE	Alu	-7	305	1	1
707	760	152	8	43	chr16	16095693	16095831	-74242514	-	AluJo	SINE	Alu	-179	133	1	1
757	2002	119	3	58	chr16	22634617	22634927	-67703418	-	AluSq2	SINE	Alu	-20	293	1	1
757	228	339	84	53	chr16	22634927	22635094	-67703251	-	MIRb	SINE	MIR	-86	182	8	1
762	1866	165	0	0	chr16	23326950	23327216	-67011129	-	AluJr	SINE	Alu	-46	266	1	1
762	19	129	22	22	chr16	23327230	23327249	-67011096	+	(TAA)n	Simple_repeat	Simple_repeat	1	20	0	1
763	2096	113	7	10	chr16	23339555	23339865	-66998480	-	AluSz	SINE	Alu	-2	310	2	1
763	3483	232	52	16	chr16	23339865	23340534	-66997811	-	L1ME1	LINE	L1	-579	5600	4899	1
763	1325	156	5	0	chr16	23440545	23440756	-66897589	-	AluJb	SINE	Alu	-100	212	1	1
764	2381	86	3	35	chr16	23470825	23471140	-66867205	-	AluSp	SINE	Alu	-8	305	1	1
765	1837	148	3	24	chr16	23607288	23607585	-66730760	-	AluJr	SINE	Alu	-11	301	11	1
766	2000	140	16	3	chr16	23741284	23741591	-66596754	-	AluSx	SINE	Alu	0	312	2	1
767	1580	141	91	0	chr16	23912812	23913080	-66425265	-	AluJo	SINE	Alu	0	312	21	1
784	1950	131	36	24	chr16	26161371	26161669	-64176676	-	AluSz	SINE	Alu	-10	302	1	1
784	1385	114	43	52	chr16	26161669	26161763	-64176582	-	MER30	DNA	hAT-Charlie	-126	104	1	1
789	1990	137	3	7	chr16	26779813	26780098	-63558247	-	AluSx1	SINE	Alu	-28	284	1	1
791	2159	193	50	2	chr16	27107255	27107692	-63230653	+	LTR71B	LTR	ERV1	152	610	0	1
791	551	188	0	0	chr16	27107692	27107777	-63230568	-	AluSz	SINE	Alu	-227	85	1	1
816	2356	72	3	34	chr16	30390923	30391038	-59947307	-	AluSc8	SINE	Alu	-203	108	1	1
817	1151	163	0	0	chr16	30486793	30486959	-59851386	-	AluJr	SINE	Alu	-10	302	137	1
967	2070	129	32	0	chr16	50076185	50076487	-40261858	-	AluSx	SINE	Alu	0	312	1	1
967	2503	155	52	70	chr16	50076494	50076548	-40261797	-	L1MB2	LINE	L1	0	6171	6121	1
990	788	187	8	0	chr16	53169235	53169358	-37168987	-	AluJr	SINE	Alu	-187	125	2	1
992	1832	167	48	0	chr16	53432415	53432690	-36905655	-	AluJb	SINE	Alu	-23	289	1	1
588	544	164	128	0	chr17	409106	409234	-82848207	-	AluJb	SINE	Alu	-139	162	14	1
599	2042	129	4	0	chr17	1862437	1862717	-81394724	-	AluSz	SINE	Alu	-30	282	2	1
599	2412	73	16	0	chr17	1862717	1863017	-81394424	-	AluSq	SINE	Alu	-8	305	1	1
723	1907	144	32	13	chr17	18106674	18106980	-65150461	-	AluJb	SINE	Alu	0	312	1	1
735	1991	144	16	16	chr17	19736583	19736895	-63520546	-	AluJo	SINE	Alu	0	312	1	1
738	1939	134	49	7	chr17	20131186	20131478	-63125963	-	AluSx1	SINE	Alu	-7	305	1	1
738	9590	151	50	86	chr17	20131478	20131636	-63125805	-	L1MD	LINE	L1	-1943	4203	4048	1
739	2038	107	0	0	chr17	20264457	20264750	-62992691	-	AluSx	SINE	Alu	0	312	22	1
819	2279	104	0	3	chr17	30776573	30776872	-52480569	-	AluSg	SINE	Alu	-12	298	1	1
819	649	183	191	21	chr17	30776888	30777078	-52480363	+	MIR	SINE	MIR	30	259	-3	1
832	1411	122	94	132	chr17	32420139	32420450	-50836991	-	AluJr	SINE	Alu	-10	302	5	1
857	1869	155	23	26	chr17	35687114	35687418	-47570023	-	AluJr	SINE	Alu	-8	304	2	1
857	1252	242	213	55	chr17	35687418	35687552	-47569889	-	HAL1	LINE	L1	-200	2307	2154	1
863	737	197	0	0	chr17	36494996	36495136	-46762305	-	FLAM_C	SINE	Alu	-82	220	2	1
879	1027	125	0	0	chr17	38641507	38641643	-44615798	-	AluJo	SINE	Alu	-176	136	1	1
879	3966	236	84	38	chr17	38641657	38642611	-44614830	+	L1ME2	LINE	L1	3948	4945	-1374	1
882	1438	142	72	37	chr17	38958128	38958253	-44299188	-	AluJo	SINE	Alu	-166	146	29	1
886	1688	148	44	28	chr17	39516355	39516646	-43740795	-	AluJo	SINE	Alu	-11	301	6	1
886	2556	60	0	3	chr17	39516660	39516962	-43740479	-	AluY	SINE	Alu	-10	301	1	1
913	1890	161	7	10	chr17	43047101	43047400	-40210041	-	AluJr	SINE	Alu	-14	298	1	1
926	1656	141	0	0	chr17	44745003	44745230	-38512211	-	AluJb	SINE	Alu	-84	228	2	1
926	339	310	29	115	chr17	44745230	44745346	-38512095	-	L1M4	LINE	L1	-858	5288	5191	1
1012	2287	97	26	56	chr17	56094552	56094819	-27162622	-	AluSc	SINE	Alu	-60	249	1	1
1032	2364	104	0	16	chr17	58644970	58645287	-24612154	-	AluSz	SINE	Alu	0	312	1	1
1032	1050	194	57	67	chr17	58645288	58645364	-24612077	+	L1MEf	LINE	L1	1703	1771	-4429	1
1097	1719	168	20	34	chr17	67130889	67131187	-16126254	-	AluJr4	SINE	Alu	-18	294	1	1
1101	1989	106	0	0	chr17	67719304	67719558	-15537883	-	AluSg	SINE	Alu	-56	254	1	1
1103	883	187	0	0	chr17	67898475	67898609	-15358832	-	AluJr4	SINE	Alu	-178	134	1	1
1105	2064	124	20	3	chr17	68277434	68277724	-14979717	-	AluSz	SINE	Alu	-17	295	1	1
1106	428	138	0	0	chr17	68394089	68394147	-14863294	-	AluSz	SINE	Alu	-244	68	11	1
1106	1781	137	14	53	chr17	68394121	68394322	-14863119	+	MER44C	DNA	TcMar-Tigger	444	643	-90	1
586	2247	124	10	0	chr18	237157	237455	-80135830	-	AluSz	SINE	Alu	-10	302	2	1
591	2255	104	0	13	chr18	914661	914960	-79458325	-	AluSz	SINE	Alu	-17	295	1	1
591	2085	139	20	0	chr18	914960	915254	-79458031	-	AluSq2	SINE	Alu	-13	300	1	1
610	2334	101	3	10	chr18	3322247	3322555	-77050730	-	AluSx1	SINE	Alu	-6	306	1	1
610	918	290	46	30	chr18	3322555	3322837	-77050448	-	L1ME3G	LINE	L1	-414	478	193	1
610	888	146	8	0	chr18	3388963	3389093	-76984192	-	AluJo	SINE	Alu	-180	132	2	1
638	1790	148	47	14	chr18	7053780	7054070	-73319215	-	AluJb	SINE	Alu	-12	300	1	1
638	825	346	112	29	chr18	7054070	7054587	-73318698	-	L3	LINE	CR1	-196	3903	3336	1
649	2271	107	16	13	chr18	8427680	8427989	-71945296	-	AluSx	SINE	Alu	-2	310	1	1
658	1504	153	96	4	chr18	9653850	9654130	-70719155	-	AluSz	SINE	Alu	0	312	2	1
659	1592	155	46	42	chr18	9830026	9830310	-70542975	-	AluJr4	SINE	Alu	-25	287	3	1
82	1962	170	9	6	chr18	9830310	9830627	-70542658	-	7SLRNA	srpRNA	srpRNA	-2	318	1	1
674	2260	124	0	7	chr18	11764099	11764406	-68608879	-	AluSx1	SINE	Alu	-7	305	1	1
674	1521	248	132	73	chr18	11764406	11764449	-68608836	-	L1MC4	LINE	L1	-784	7258	7222	1
681	1926	147	20	47	chr18	12599259	12599559	-67773726	-	AluJr4	SINE	Alu	-16	296	5	1
681	3038	217	121	48	chr18	12599559	12599791	-67773494	-	L1MC4	LINE	L1	-414	7628	7366	1
1158	2243	116	3	7	chr18	75119957	75120310	-5252975	-	AluSp	SINE	Alu	0	313	1	1
1171	2086	153	0	13	chr18	76832065	76832379	-3540906	-	AluSz6	SINE	Alu	-1	311	2	1
1171	5056	237	71	52	chr18	76832379	76833872	-3539413	-	L1ME3	LINE	L1	-1127	5019	3503	1
715	1666	151	60	0	chr19	17065986	17066251	-41551365	-	AluJo	SINE	Alu	-30	282	1	1
843	1760	184	0	3	chr19	33883363	33883645	-24733971	-	AluJr	SINE	Alu	-30	282	2	1
843	1738	166	13	23	chr19	33909184	33909486	-24708130	-	AluJr	SINE	Alu	-1	311	13	1
980	1579	118	153	4	chr20	51819107	51819369	-12624798	-	AluSq	SINE	Alu	-5	308	1	2
980	1710	156	55	20	chr20	51819371	51819392	-12624775	-	AluJr	SINE	Alu	-5	307	292	2
1070	2212	109	10	0	chr20	63625179	63625472	-818695	-	AluSx1	SINE	Alu	-16	296	1	2
646	1652	191	50	0	chrX	8115682	8115965	-147924930	-	AluJb	SINE	Alu	-14	298	1	4
650	891	151	0	0	chrX	8561620	8561746	-147479149	-	FLAM_C	SINE	Alu	-17	126	1	4
679	2086	123	0	31	chrY	12340607	12340925	-44886490	-	AluSx	SINE	Alu	-4	308	1	4
683	1912	171	0	3	chrY	12949782	12950080	-44277335	-	AluSq2	SINE	Alu	-12	301	5	4
683	939	131	7	7	chrY	12950082	12950219	-44277196	-	AluSx	SINE	Alu	-175	137	1	4
726	1940	166	0	0	chrY	18502340	18502624	-38724791	-	AluSx4	SINE	Alu	-26	284	1	4
743	1672	166	43	10	chrY	20782705	20782994	-36444421	-	AluSz	SINE	Alu	-12	300	2	4
759	1511	197	3	63	chrY	22863491	22863806	-34363609	-	AluSc	SINE	Alu	-12	297	2	4
771	1621	197	3	63	chrY	24497239	24497554	-32729861	-	AluSc	SINE	Alu	-12	297	2	4
1007	2326	97	3	0	chr1	55316173	55316471	-193639951	-	AluSx	SINE	Alu	-13	299	1	1
1007	2301	117	0	3	chr1	55355929	55356238	-193600184	-	AluSg	SINE	Alu	-2	308	1	1
1011	2349	84	7	29	chr1	55901951	55902261	-193054161	-	AluSc	SINE	Alu	-6	303	1	1
1011	340	334	91	61	chr1	55902261	55902387	-193054035	-	L1MEc	LINE	L1	-5921	1101	975	1
1011	1804	165	3	27	chr1	55936626	55936923	-193019499	-	AluJr	SINE	Alu	-22	290	1	1
1011	633	298	12	114	chr1	55936923	55937008	-193019414	+	MIR	SINE	MIR	183	251	-11	1
1015	1835	130	84	0	chr1	56428908	56429192	-192527230	-	AluSx1	SINE	Alu	-1	311	2	1
1015	2090	148	51	71	chr1	56429192	56429264	-192527158	+	MSTA	LTR	ERVL-MaLR	365	428	0	1
1016	1805	134	38	14	chr1	56503790	56504073	-192452349	-	AluSz6	SINE	Alu	-22	290	1	1
1016	2105	112	61	0	chr1	56583549	56583827	-192372595	-	AluSz6	SINE	Alu	-15	297	2	1
1016	2027	133	0	58	chr1	56616727	56616845	-192339577	-	AluSx	SINE	Alu	-195	117	1	1
1016	1536	133	4	9	chr1	56616862	56617087	-192339335	-	AluJb	SINE	Alu	-3	309	86	1
1017	2307	111	0	0	chr1	56624073	56624370	-192332052	-	AluSq2	SINE	Alu	-15	298	2	1
1017	7566	123	33	19	chr1	56624370	56624493	-192331929	+	THE1D-int	LTR	ERVL-MaLR	1522	1631	0	1
1017	2069	118	30	24	chr1	56665077	56665373	-192291049	-	AluSx1	SINE	Alu	-14	298	1	1
1017	2477	83	0	3	chr1	56678693	56678993	-192277429	-	AluSc	SINE	Alu	-10	299	1	1
1017	535	381	67	46	chr1	56678999	56679612	-192276810	+	L2c	LINE	L2	2037	2663	-756	1
1017	2048	128	29	13	chr1	56705395	56705699	-192250723	-	AluJb	SINE	Alu	-3	309	1	1
1019	2294	111	7	0	chr1	56936583	56936889	-192019533	-	AluSx	SINE	Alu	-1	311	4	1
1020	1586	187	49	0	chr1	57147028	57147301	-191809121	-	AluJb	SINE	Alu	-10	302	16	1
1023	2439	93	0	0	chr1	57525935	57526235	-191430187	-	AluSg	SINE	Alu	-10	300	1	1
1025	1074	83	7	0	chr1	57765797	57765930	-191190492	-	AluSz	SINE	Alu	-178	134	1	1
1025	839	204	11	11	chr1	57765934	57766117	-191190305	+	L2a	LINE	L2	2171	2353	-1066	1
1027	2386	127	0	9	chr1	58000555	58000870	-190955552	-	AluSz	SINE	Alu	0	312	1	1
1028	2273	125	0	0	chr1	58107605	58107916	-190848506	-	AluSq2	SINE	Alu	-2	311	1	1
1028	276	321	73	112	chr1	58107916	58108059	-190848363	-	L2b	LINE	L2	-311	3076	2934	1
1031	2394	124	0	0	chr1	58467915	58468222	-190488200	-	AluSc	SINE	Alu	-2	307	1	1
1031	1175	237	18	52	chr1	58468222	58468492	-190487930	-	L1ME3Cz	LINE	L1	-250	747	480	1
1031	2481	81	0	3	chr1	58529872	58530180	-190426242	-	AluY	SINE	Alu	-4	307	1	1
1031	961	196	186	54	chr1	58530180	58530264	-190426158	+	MER2	DNA	TcMar-Tigger	248	345	0	1
1033	2053	128	10	7	chr1	58752469	58752766	-190203656	-	AluSx	SINE	Alu	-14	298	1	1
1035	2309	119	0	0	chr1	59050722	59051032	-189905390	-	AluSx3	SINE	Alu	-1	310	1	1
1040	1872	161	7	7	chr1	59734212	59734491	-189221931	-	AluJb	SINE	Alu	-21	291	13	1
1040	207	335	66	94	chr1	59734491	59734601	-189221821	+	L2c	LINE	L2	3036	3135	-252	1
1040	2059	144	20	26	chr1	59754412	59754717	-189201705	-	AluSz6	SINE	Alu	-9	303	1	1
1040	1523	323	101	65	chr1	59754717	59755102	-189201320	-	LTR78	LTR	ERV1	-676	628	201	1
1041	2377	95	0	0	chr1	59824210	59824504	-189131918	-	AluSg	SINE	Alu	-15	295	2	1
1042	2114	161	0	0	chr1	59944224	59944522	-189011900	-	AluJb	SINE	Alu	-14	298	1	1
1042	420	278	96	122	chr1	59944522	59944934	-189011488	-	L1ME4b	LINE	L1	-469	423	30	1
1043	1870	165	3	10	chr1	60105327	60105624	-188850798	-	AluJb	SINE	Alu	-17	295	1	1
1044	2180	136	0	0	chr1	60163573	60163868	-188792554	-	AluSz6	SINE	Alu	-17	295	1	1
1044	1860	182	0	10	chr1	60243181	60243477	-188712945	-	AluJb	SINE	Alu	-19	293	1	1
1329	2115	155	0	3	chr1	97635810	97636120	-151320302	-	AluJb	SINE	Alu	-3	309	1	1
1335	804	176	0	15	chr1	98390527	98390658	-150565764	-	AluJr4	SINE	Alu	-179	133	5	1
1335	1916	132	0	4	chr1	98407531	98407804	-150548618	-	AluSg	SINE	Alu	0	310	39	1
1697	2077	115	11	0	chr1	145756831	145757135	-103199287	-	AluSx	SINE	Alu	0	312	1	2
1697	1687	208	64	58	chr1	145757135	145757319	-103199103	-	MLT1C	LTR	ERVL-MaLR	-289	178	2	2
1697	1758	169	55	10	chr1	145791919	145792215	-103164207	-	AluJo	SINE	Alu	0	312	3	2
1697	1611	186	50	4	chr1	145799629	145799893	-103156529	-	AluJr	SINE	Alu	-35	277	1	2
1697	7513	174	25	55	chr1	145799893	145800052	-103156370	-	L1MB2	LINE	L1	-2122	4018	3852	2
1697	2174	80	27	71	chr1	145816070	145816381	-103140041	-	AluSq2	SINE	Alu	-16	297	1	2
1697	1761	158	34	7	chr1	145869483	145869768	-103086654	-	AluJo	SINE	Alu	-19	293	1	2
1697	481	296	83	0	chr1	145869769	145869901	-103086521	-	MIRb	SINE	MIR	-99	169	26	2
1698	2444	81	3	0	chr1	145894111	145894409	-103062013	-	AluY	SINE	Alu	-12	299	1	2
1698	294	314	41	114	chr1	145894409	145894450	-103061972	+	L2b	LINE	L2	3344	3375	0	2
1698	2009	139	0	23	chr1	145905580	145905883	-103050539	-	AluJr	SINE	Alu	-16	296	1	2
1698	1954	130	0	43	chr1	145905928	145906228	-103050194	-	AluSz	SINE	Alu	-25	287	1	2
1698	2240	106	10	3	chr1	145988310	145988611	-102967811	-	AluSx1	SINE	Alu	-9	303	1	2
1710	2529	80	0	3	chr1	147537901	147538213	-101418209	-	AluY	SINE	Alu	0	311	1	2
1712	13860	155	30	15	chr1	147728700	147732171	-101224251	-	L1MA4A	LINE	L1	-5	7705	4214	2
1712	704	120	0	0	chr1	147732172	147732264	-101224158	-	AluSx	SINE	Alu	-220	92	1	2
1712	1950	66	16	0	chr1	147732265	147732564	-101223858	-	L1PREC2	LINE	L1	-733	5427	5124	2
1713	2399	94	0	3	chr1	147956741	147957038	-100999384	-	AluSz	SINE	Alu	-16	296	1	2
1714	2040	80	27	70	chr1	148071296	148071609	-100884813	-	AluSq2	SINE	Alu	-14	299	1	2
1715	1928	151	6	6	chr1	148121030	148121342	-100835080	-	AluSx1	SINE	Alu	0	312	1	2
1715	2347	78	0	26	chr1	148121348	148121654	-100834768	-	AluY	SINE	Alu	-13	298	1	2
1715	1369	157	162	0	chr1	148150153	148150401	-100806021	-	AluJb	SINE	Alu	-14	298	3	2
1716	2410	90	0	0	chr1	148367954	148368254	-100588168	-	AluSc	SINE	Alu	-9	300	1	2
1716	3135	299	52	55	chr1	148368254	148368727	-100587695	-	PRIMA4-int	LTR	ERV1	-2641	5629	5161	2
1895	1776	183	10	7	chr1	171832898	171833198	-77123224	-	AluJb	SINE	Alu	-10	302	2	2
1895	2112	137	10	0	chr1	171833939	171834238	-77122184	-	AluSz	SINE	Alu	-10	302	1	2
1896	594	155	0	12	chr1	171890883	171890967	-77065455	-	AluJr	SINE	Alu	-228	84	2	2
1896	1073	104	0	0	chr1	171894122	171894257	-77062165	-	AluSz	SINE	Alu	-177	135	1	2
1898	1709	152	30	30	chr1	172151882	172152177	-76804245	-	AluJo	SINE	Alu	-11	301	7	2
1904	1017	107	0	0	chr1	172897653	172897784	-76058638	-	AluSc5	SINE	Alu	-178	131	1	2
1905	1688	143	0	55	chr1	173089049	173089158	-75867264	-	AluJb	SINE	Alu	-186	126	23	2
1905	6059	109	15	33	chr1	173089189	173090922	-75865500	-	L1PA14	LINE	L1	-2	6159	4461	2
1908	2313	122	0	0	chr1	173499295	173499598	-75456824	-	AluSx4	SINE	Alu	-7	303	1	2
1908	10668	166	101	82	chr1	173499598	173499851	-75456571	+	PABL_A-int	LTR	ERV1	5697	5943	-3	2
1909	494	158	0	3	chr1	173656903	173656991	-75299431	+	FLAM_C	SINE	Alu	2	77	-56	2
1909	687	122	0	0	chr1	173656986	173657076	-75299346	-	AluJo	SINE	Alu	-221	91	2	2
1910	2198	119	0	0	chr1	173789308	173789601	-75166821	-	AluSx1	SINE	Alu	-19	293	1	2
1910	4167	199	118	68	chr1	173789601	173790487	-75165935	+	Charlie1a	DNA	hAT-Charlie	253	1268	-187	2
2185	2037	110	0	0	chr1	209822289	209822552	-39133870	-	AluSz	SINE	Alu	-48	264	2	3
2185	1977	160	0	6	chr1	209829471	209829784	-39126638	-	AluJo	SINE	Alu	0	312	2	3
2186	2009	141	3	28	chr1	209895166	209895486	-39060936	-	AluJb	SINE	Alu	0	312	1	3
2186	4345	142	33	79	chr1	209895486	209896122	-39060300	-	LTR39	LTR	ERV1	-173	610	1	3
2186	1528	196	0	56	chr1	209908430	209908716	-39047706	-	AluJr4	SINE	Alu	-40	272	3	3
2288	2045	137	0	3	chr1	223241958	223242242	-25714180	-	AluJb	SINE	Alu	-29	283	1	3
2290	1761	148	0	107	chr1	223521464	223521802	-25434620	-	AluJb	SINE	Alu	-10	302	1	3
2449	2091	120	0	3	chr1	244374587	244374897	-4581525	-	AluSz	SINE	Alu	0	312	1	3
2449	2341	93	29	0	chr1	244380117	244380419	-4576003	-	AluSz	SINE	Alu	-1	311	1	3
2450	2551	78	0	3	chr1	244508291	244508600	-4447822	-	AluY	SINE	Alu	-3	308	1	3
2450	14740	150	21	57	chr1	244508600	244508716	-4447706	-	L1MA4	LINE	L1	-1812	5750	5639	3
2451	2091	107	0	18	chr1	244623058	244623369	-4333053	-	AluSx1	SINE	Alu	0	312	9	3
2451	619	283	73	38	chr1	244623369	244623642	-4332780	-	ERVL-E-int	LTR	ERVL	-1208	4506	4221	3
2451	1902	168	21	7	chr1	244669010	244669296	-4287126	-	AluJb	SINE	Alu	-22	290	1	3
966	2189	114	0	38	chr2	49976017	49976334	-192217195	-	AluSz	SINE	Alu	-7	305	1	1
966	462	298	87	68	chr2	49976334	49976462	-192217067	+	L1MC4a	LINE	L1	720	846	-46	1
967	2146	132	3	0	chr2	50097642	50097938	-192095591	-	AluSp	SINE	Alu	-16	297	1	1
967	1868	152	0	7	chr2	50170320	50170596	-192022933	-	AluSx3	SINE	Alu	-37	274	1	1
967	896	203	47	126	chr2	50170596	50170743	-192022786	+	Tigger4a	DNA	TcMar-Tigger	105	235	-1	1
1024	2016	153	3	0	chr2	57646923	57647211	-184546318	-	AluSx	SINE	Alu	-23	289	1	1
1028	2048	135	0	0	chr2	58067927	58068209	-184125320	-	AluSz	SINE	Alu	-10	302	21	1
1028	2926	268	93	24	chr2	58068225	58069983	-184123546	-	L1MD2	LINE	L1	-663	2314	134	1
1032	2431	93	0	7	chr2	58604914	58605216	-183588313	-	AluSx	SINE	Alu	-12	300	1	2
1034	1641	198	10	31	chr2	58944986	58945305	-183248224	-	AluJo	SINE	Alu	0	312	1	2
1034	5167	204	97	25	chr2	58945305	58946367	-183247162	-	L1MEc	LINE	L1	-5228	1172	42	2
1042	875	150	0	8	chr2	60005494	60005627	-182187902	-	FLAM_A	SINE	Alu	-10	132	1	2
1042	2267	296	82	54	chr2	60005627	60006996	-182186533	-	L1MEd	LINE	L1	-5155	1948	503	2
1045	1804	188	13	3	chr2	60389441	60389750	-181803779	-	AluJb	SINE	Alu	0	312	1	2
1047	2210	135	0	0	chr2	60601462	60601765	-181591764	-	AluSx	SINE	Alu	-8	304	2	2
1047	2261	127	13	0	chr2	60667973	60668281	-181525248	-	AluSq2	SINE	Alu	-1	312	1	2
1047	5242	212	57	67	chr2	60668281	60668510	-181525019	+	Charlie1a	DNA	hAT-Charlie	1044	1283	-172	2
1048	2439	77	3	0	chr2	60712239	60712536	-181480993	-	AluSp	SINE	Alu	-15	298	1	2
1048	22	217	0	0	chr2	60712536	60712560	-181480969	+	(TTT)n	Simple_repeat	Simple_repeat	3	26	0	2
1048	1859	139	0	14	chr2	60755143	60755451	-181438078	-	AluJr	SINE	Alu	0	312	10	2
1048	1943	153	0	20	chr2	60770622	60770922	-181422607	-	AluSc8	SINE	Alu	-17	294	1	2
1048	2337	104	3	0	chr2	60785128	60785436	-181408093	-	AluYf1	SINE	Alu	-2	309	1	2
1048	863	146	0	29	chr2	60789398	60789535	-181403994	-	FLAM_C	SINE	Alu	-10	133	1	2
1049	1871	162	11	3	chr2	60895197	60895481	-181298048	-	AluJb	SINE	Alu	-26	286	1	2
1049	12	219	19	38	chr2	60895481	60895503	-181298026	+	(CATTAA)n	Simple_repeat	Simple_repeat	6	26	0	2
1049	2410	92	10	10	chr2	60906913	60907219	-181286310	-	AluSq2	SINE	Alu	-7	306	1	2
1049	613	342	94	41	chr2	60907219	60907362	-181286167	+	L2c	LINE	L2	3225	3377	-10	2
1049	2246	127	3	0	chr2	60920192	60920500	-181273029	-	AluSx	SINE	Alu	-3	309	1	2
1051	2284	110	3	0	chr2	61159295	61159595	-181033934	-	AluSz	SINE	Alu	-11	301	1	2
1052	1895	180	7	0	chr2	61259391	61259685	-180933844	-	AluSz	SINE	Alu	-16	296	1	2
1052	2127	130	10	10	chr2	61326777	61327085	-180866444	-	AluSx	SINE	Alu	-4	308	1	2
1070	2134	90	4	26	chr2	63697955	63698222	-178495307	-	AluSx	SINE	Alu	-19	293	33	2
1070	334	282	50	53	chr2	63698222	63698245	-178495284	+	L1ME4a	LINE	L1	6104	6122	-2	2
1073	2353	106	3	6	chr2	63979228	63979540	-178213989	-	AluSx1	SINE	Alu	-1	311	1	2
1073	4253	232	89	9	chr2	63979540	63980617	-178212912	-	L1MEc	LINE	L1	-3059	3260	2115	2
1073	2028	94	107	29	chr2	64062025	64062301	-178131228	-	AluSx3	SINE	Alu	-11	300	1	2
1073	956	213	17	17	chr2	64068849	64069023	-178124506	-	AluSx3	SINE	Alu	-17	294	121	2
1073	2554	189	99	33	chr2	64069025	64069355	-178124174	+	MER101-int	LTR	ERV1	1382	1744	-4895	2
1074	2241	124	7	16	chr2	64102835	64103141	-178090388	-	AluJb	SINE	Alu	-9	303	1	2
1074	2300	110	0	10	chr2	64131619	64131920	-178061609	-	AluSz	SINE	Alu	-14	298	1	2
1075	2093	129	32	0	chr2	64293697	64293999	-177899530	-	AluSz	SINE	Alu	0	312	1	2
1076	2412	105	0	0	chr2	64431230	64431536	-177761993	-	AluSq2	SINE	Alu	-7	306	1	2
1076	9469	170	45	19	chr2	64431536	64433047	-177760482	-	L1MDa	LINE	L1	-4381	2252	698	2
1077	2482	106	0	3	chr2	64576757	64577058	-177616471	-	AluSx1	SINE	Alu	-12	300	1	2
1077	376	261	126	78	chr2	64577058	64577194	-177616335	-	MIR3	SINE	MIR	-58	150	3	2
1078	2187	122	0	3	chr2	64619019	64619315	-177574214	-	AluSx	SINE	Alu	-17	295	1	2
1078	1579	104	0	102	chr2	64619315	64619470	-177574059	+	MER30	DNA	hAT-Charlie	101	230	0	2
1078	2296	104	0	7	chr2	64694920	64695228	-177498301	-	AluSx1	SINE	Alu	-2	310	5	2
1078	226	274	0	23	chr2	64695238	64695324	-177498205	-	L1MEf	LINE	L1	-5655	745	662	2
1079	2079	121	3	0	chr2	64850212	64850521	-177343008	-	AluSq2	SINE	Alu	0	313	2	2
1079	2268	121	0	0	chr2	64872248	64872555	-177320974	-	AluSx	SINE	Alu	-5	307	1	2
1081	2436	85	3	0	chr2	65013215	65013521	-177180008	-	AluSp	SINE	Alu	-6	307	1	2
1081	2442	73	7	7	chr2	65076995	65077296	-177116233	-	AluSp	SINE	Alu	-11	302	2	2
1081	1838	154	14	10	chr2	65089219	65089511	-177104018	-	AluJb	SINE	Alu	-19	293	1	2
1081	804	189	0	8	chr2	65095201	65095333	-177098196	-	AluJo	SINE	Alu	-179	133	3	2
1081	700	198	60	37	chr2	65099610	65099772	-177093757	-	AluJr	SINE	Alu	-2	310	145	2
1081	369	164	27	0	chr2	65099772	65099845	-177093684	+	MER3	DNA	hAT-Charlie	135	209	0	2
1082	2013	120	3	14	chr2	65193762	65194045	-176999484	-	AluSx1	SINE	Alu	-20	292	13	2
1082	4917	148	25	50	chr2	65194045	65194065	-176999464	+	L1MB8	LINE	L1	7126	7138	0	2
1177	2124	127	0	47	chr2	77604054	77604376	-164589153	-	AluSx1	SINE	Alu	-5	307	1	2
1181	1785	112	102	11	chr2	78155943	78156210	-164037319	-	AluSg	SINE	Alu	-16	294	1	2
1181	1615	171	27	79	chr2	78156210	78156393	-164037136	+	MER44A	DNA	TcMar-Tigger	172	339	0	2
1182	2004	61	118	0	chr2	78310506	78310769	-163882760	-	AluSp	SINE	Alu	-15	298	1	2
1182	3709	205	14	65	chr2	78310769	78311119	-163882410	-	L1MB1	LINE	L1	-39	6129	5787	2
1182	2013	119	7	34	chr2	78359423	78359753	-163833776	-	AluSx1	SINE	Alu	0	312	1	2
1186	714	202	24	0	chr2	78855065	78855189	-163338340	-	FLAM_C	SINE	Alu	-16	127	1	2
1187	2204	134	0	0	chr2	78943089	78943395	-163250134	-	AluSx	SINE	Alu	-6	306	1	2
1187	1228	301	79	71	chr2	78943395	78944105	-163249424	+	L1ME3D	LINE	L1	3590	4348	-1798	2
1188	2056	132	0	0	chr2	79048775	79049062	-163144467	-	AluSz	SINE	Alu	-5	307	21	2
1188	9098	129	8	53	chr2	79049062	79049329	-163144200	+	L1MA2	LINE	L1	6512	6762	-803	2
1192	2370	108	0	3	chr2	79616896	79617201	-162576328	-	AluSx3	SINE	Alu	-7	304	1	2
1192	13	167	49	0	chr2	79617201	79617229	-162576300	+	(TAATATT)n	Simple_repeat	Simple_repeat	6	35	0	2
1193	1366	181	37	0	chr2	79772591	79772828	-162420701	-	AluJr4	SINE	Alu	-30	282	37	2
1198	2499	60	0	0	chr2	80380028	80380335	-161813194	-	AluY	SINE	Alu	0	311	1	2
1199	2421	63	0	11	chr2	80596279	80596611	-161596918	-	AluYm1	SINE	Alu	0	311	1	2
1199	7968	92	3	14	chr2	80596611	80597159	-161596370	-	L1P3	LINE	L1	-1904	4242	3701	2
1212	2364	95	0	10	chr2	82295699	82296004	-159897525	-	AluY	SINE	Alu	-9	302	1	2
1212	369	282	128	68	chr2	82296007	82296371	-159897158	-	L1MC4a	LINE	L1	-1999	5883	5502	2
1213	2196	135	0	0	chr2	82354519	82354822	-159838707	-	AluSg	SINE	Alu	-7	303	1	2
1213	6226	98	6	16	chr2	82354822	82355533	-159837996	-	L1PA8A	LINE	L1	-640	5491	4787	2
1213	1833	146	58	0	chr2	82398751	82399012	-159794517	-	AluSx1	SINE	Alu	-35	277	1	2
1213	248	171	128	0	chr2	82399013	82399095	-159794434	-	L1MA4	LINE	L1	-46	6254	6161	2
1214	2341	92	0	30	chr2	82511650	82511955	-159681574	-	AluSp	SINE	Alu	-17	296	1	2
1214	4816	141	45	19	chr2	82511955	82512739	-159680790	+	L1PA15	LINE	L1	5340	6153	-12	2
1218	1943	155	14	0	chr2	83033955	83034245	-159159284	-	AluSz6	SINE	Alu	-16	296	3	2
1219	2195	119	3	31	chr2	83170601	83170920	-159022609	-	AluSp	SINE	Alu	-3	310	1	2
1219	1912	136	6	83	chr2	83208555	83208710	-158984819	-	AluJb	SINE	Alu	-175	137	1	2
1220	2017	129	38	0	chr2	83339925	83340205	-158853324	-	AluSx1	SINE	Alu	-21	291	1	2
1220	2275	179	15	12	chr2	83340206	83340804	-158852725	+	L1MC1	LINE	L1	5081	5682	-662	2
1224	1780	199	0	13	chr2	83758837	83759153	-158434376	-	AluJb	SINE	Alu	0	312	1	2
1224	5289	183	16	16	chr2	83759153	83760738	-158432791	-	L1MA5	LINE	L1	-355	6647	5048	2
1224	2057	128	0	4	chr2	83820207	83820513	-158373016	-	AluSx	SINE	Alu	0	312	3	2
1224	18152	135	11	14	chr2	83820513	83821598	-158371931	-	L1PA13	LINE	L1	-3236	3530	2458	2
1226	1963	120	7	47	chr2	84133416	84133715	-158059814	-	AluSx	SINE	Alu	-25	287	1	2
1232	2307	97	0	7	chr2	84826531	84826831	-157366698	-	AluSg7	SINE	Alu	-11	298	1	2
1233	2294	114	0	9	chr2	84983494	84983809	-157209720	-	AluSq2	SINE	Alu	0	313	2	2
1233	1586	199	10	24	chr2	84983809	84983942	-157209587	-	AluJo	SINE	Alu	-178	134	1	2
1233	2149	119	0	0	chr2	84993590	84993875	-157199654	-	AluSq2	SINE	Alu	-28	285	1	2
1233	1119	246	77	98	chr2	84993875	84993902	-157199627	-	L1MC5a	LINE	L1	-139	2638	2618	2
1233	2285	96	0	3	chr2	84995027	84995320	-157198209	-	AluSg	SINE	Alu	-18	292	1	2
1233	1477	189	120	4	chr2	85008765	85009029	-157184500	-	AluJb	SINE	Alu	-13	299	1	2
1233	2209	120	0	3	chr2	85060887	85061186	-157132343	-	AluJb	SINE	Alu	-14	298	1	2
1234	2052	140	3	0	chr2	85102722	85103022	-157090507	-	AluSq2	SINE	Alu	-12	301	1	2
1235	2115	115	14	0	chr2	85241431	85241744	-156951785	-	AluSq2	SINE	Alu	0	313	1	2
1235	2395	96	3	3	chr2	85281020	85281323	-156912206	-	AluSz	SINE	Alu	-9	303	1	2
1235	394	305	91	48	chr2	85281323	85281441	-156912088	+	MIRc	SINE	MIR	132	251	-17	2
1235	2300	120	0	0	chr2	85281986	85282287	-156911242	-	AluSz	SINE	Alu	-11	301	1	2
1236	2181	143	0	0	chr2	85335872	85336179	-156857350	-	AluSz	SINE	Alu	-5	307	1	2
1236	187	281	59	30	chr2	85336179	85336210	-156857319	+	MIRc	SINE	MIR	127	157	-111	2
1236	2162	74	0	51	chr2	85420092	85420417	-156773112	-	AluSx	SINE	Alu	0	312	3	2
1237	2178	140	3	6	chr2	85489160	85489474	-156704055	-	AluSq	SINE	Alu	0	313	1	2
1237	524	184	16	120	chr2	85489474	85489551	-156703978	+	LTR49-int	LTR	ERV1	3204	3272	-3059	2
1237	2151	139	3	0	chr2	85498600	85498910	-156694619	-	AluSz	SINE	Alu	-1	311	1	2
1237	1874	146	84	102	chr2	85498910	85498941	-156694588	+	MER57B2	LTR	ERV1	240	255	-148	2
1237	2379	93	0	10	chr2	85513997	85514309	-156679220	-	AluSx1	SINE	Alu	-3	309	1	2
1237	2340	110	0	3	chr2	85532451	85532760	-156660769	-	AluSx3	SINE	Alu	-2	309	2	2
1237	21	85	118	0	chr2	85532762	85532813	-156660716	+	(TCCTC)n	Simple_repeat	Simple_repeat	1	57	0	2
1237	1949	156	30	0	chr2	85567960	85568255	-156625274	-	AluJb	SINE	Alu	-8	304	1	2
1237	2117	147	0	0	chr2	85582949	85583249	-156610280	-	AluJo	SINE	Alu	-10	302	3	2
1237	1447	153	153	4	chr2	85587988	85588243	-156605286	-	AluSg	SINE	Alu	-10	300	1	2
1238	2376	85	3	0	chr2	85609686	85609979	-156583550	-	AluSx	SINE	Alu	-17	295	2	2
1238	2211	114	10	0	chr2	85629058	85629355	-156564174	-	AluSq2	SINE	Alu	-8	305	6	2
1238	2558	77	0	0	chr2	85629486	85629796	-156563733	-	AluSq	SINE	Alu	-3	310	1	2
1238	2004	152	3	3	chr2	85690471	85690773	-156502756	-	AluJr	SINE	Alu	-9	303	2	2
1238	2709	170	14	52	chr2	85690773	85690931	-156502598	-	L1MB4	LINE	L1	-418	5762	5615	2
1239	2397	103	0	0	chr2	85818765	85819066	-156374463	-	AluSg	SINE	Alu	-8	302	2	2
1239	755	279	56	33	chr2	85819066	85819212	-156374317	-	L1ME5	LINE	L1	-485	5709	5562	2
1240	2293	110	0	3	chr2	85903023	85903322	-156290207	-	AluSx1	SINE	Alu	-14	298	1	2
1241	1987	104	0	0	chr2	86051975	86052244	-156141285	-	AluSz	SINE	Alu	-43	269	1	2
1241	2163	143	0	0	chr2	86059558	86059865	-156133664	-	AluSz6	SINE	Alu	-5	307	1	2
1242	2225	105	7	3	chr2	86150920	86151216	-156042313	-	AluSz	SINE	Alu	-14	298	2	2
1243	2229	80	14	11	chr2	86320832	86321119	-155872410	-	AluSq2	SINE	Alu	-25	288	1	2
1243	2208	242	99	23	chr2	86321119	86322258	-155871271	+	L1MEd	LINE	L1	3370	4559	-1587	2
1244	2178	114	0	13	chr2	86376628	86376934	-155816595	-	AluSx	SINE	Alu	-10	302	1	2
1244	16858	142	28	74	chr2	86376934	86377876	-155815653	-	L1MA5	LINE	L1	-846	6716	5743	2
1244	6899	65	7	3	chr2	86390909	86392414	-155801115	-	L1PA7	LINE	L1	-3	6151	4644	2
1244	690	88	0	0	chr2	86392415	86392495	-155801034	-	AluSq10	SINE	Alu	-233	80	1	2
1244	1851	133	43	7	chr2	86397367	86397666	-155795863	-	AluJo	SINE	Alu	0	312	1	2
1245	2136	119	4	11	chr2	86535527	86535805	-155657724	-	AluSx	SINE	Alu	-36	276	1	2
1245	6158	209	81	39	chr2	86535805	86535990	-155657539	-	L1MB3	LINE	L1	-5190	2327	2116	2
1246	2224	119	0	53	chr2	86705465	86705784	-155487745	-	AluSx1	SINE	Alu	-10	302	1	2
1246	644	245	104	104	chr2	86705784	86705933	-155487596	-	MIR	SINE	MIR	-71	191	22	2
1246	2117	157	0	3	chr2	86711886	86712191	-155481338	-	AluJb	SINE	Alu	-8	304	1	2
1246	1715	163	27	27	chr2	86768943	86769237	-155424292	-	AluJr	SINE	Alu	-10	302	9	2
1246	324	266	60	9	chr2	86769244	86769354	-155424175	-	MER5C1	DNA	hAT-Charlie	-147	116	1	2
1247	1690	163	62	14	chr2	86801350	86801644	-155391885	-	AluJb	SINE	Alu	-1	311	3	2
1247	2090	102	53	0	chr2	86833195	86833478	-155360051	-	AluSz6	SINE	Alu	-13	299	1	2
1247	2127	117	4	0	chr2	86846927	86847236	-155346293	-	AluSz6	SINE	Alu	0	312	1	2
1247	2347	89	0	3	chr2	86880424	86880717	-155312812	-	AluSp	SINE	Alu	-21	292	1	2
1247	8626	139	37	15	chr2	86880717	86882446	-155311083	+	L1PB3	LINE	L1	4378	6136	-18	2
1248	1929	158	0	0	chr2	86910369	86910653	-155282876	-	AluSz6	SINE	Alu	-4	308	25	2
1248	2098	159	0	0	chr2	86920061	86920369	-155273160	-	AluSz6	SINE	Alu	-4	308	1	2
1248	2049	135	3	0	chr2	86936497	86936785	-155256744	-	AluSx1	SINE	Alu	-23	289	1	2
1248	2524	73	0	10	chr2	86965300	86965614	-155227915	-	AluY	SINE	Alu	0	311	1	2
1248	2034	121	0	36	chr2	86968731	86969036	-155224493	-	AluSz	SINE	Alu	-15	297	4	2
1248	2332	113	0	0	chr2	86978390	86978691	-155214838	-	AluSx1	SINE	Alu	-11	301	1	2
1318	2185	129	0	3	chr2	96077336	96077639	-146115890	-	AluSz6	SINE	Alu	-10	302	1	2
1318	10806	137	16	26	chr2	96077639	96078453	-146115076	-	L1MCa	LINE	L1	-1661	4660	3631	2
1318	2538	64	0	13	chr2	96106682	96106995	-146086534	-	AluY	SINE	Alu	-2	309	1	2
1318	465	227	125	16	chr2	96107004	96107125	-146086404	-	MIRb	SINE	MIR	-119	149	14	2
1318	2161	110	3	0	chr2	96188266	96188574	-146004955	-	AluSp	SINE	Alu	0	313	1	2
1318	1488	222	75	92	chr2	96188574	96188601	-146004928	+	MER68B	LTR	ERVL	276	295	-269	2
1319	2238	80	0	13	chr2	96226083	96226384	-145967145	-	AluSq2	SINE	Alu	-16	297	1	2
1319	2065	210	119	87	chr2	96226384	96226418	-145967111	-	L1ME1	LINE	L1	-697	5482	5441	2
1319	2330	76	7	0	chr2	96269641	96269943	-145923586	-	AluY	SINE	Alu	-6	305	2	2
1319	1792	159	0	62	chr2	96314045	96314354	-145879175	-	AluJr	SINE	Alu	-22	290	1	2
1319	750	236	111	51	chr2	96314354	96314612	-145878917	+	Tigger8	DNA	TcMar-Tigger	278	547	-120	2
1319	2256	104	7	23	chr2	96314664	96314972	-145878557	-	AluSz	SINE	Alu	-8	304	2	2
1320	2176	96	4	0	chr2	96337931	96338212	-145855317	-	AluSz6	SINE	Alu	-17	295	14	2
1320	549	307	140	53	chr2	96338223	96338446	-145855083	+	L2	LINE	L2	1492	1744	-1675	2
1320	2162	117	3	16	chr2	96410512	96410828	-145782701	-	AluSx	SINE	Alu	0	312	1	2
1320	3104	112	14	51	chr2	96410828	96411276	-145782253	+	LTR72	LTR	ERV1	72	507	-12	2
1321	893	114	23	8	chr2	96492454	96492585	-145700944	-	AluJr	SINE	Alu	-178	134	2	2
1321	1184	279	48	28	chr2	96492585	96492814	-145700715	-	L1MB7	LINE	L1	-1112	1353	971	2
1321	1800	151	15	4	chr2	96559526	96559797	-145633732	-	AluJb	SINE	Alu	-26	286	13	2
1321	1514	200	93	95	chr2	96559797	96559870	-145633659	+	MLT1C	LTR	ERVL-MaLR	416	467	0	2
1322	2284	97	0	0	chr2	96641490	96641779	-145551750	-	AluSz6	SINE	Alu	-13	299	11	2
1322	2192	117	0	3	chr2	96658016	96658315	-145535214	-	AluSg	SINE	Alu	-12	298	1	2
1322	1571	78	214	0	chr2	96658318	96658549	-145534980	-	AluSg	SINE	Alu	-14	296	3	2
1322	2002	147	7	3	chr2	96678432	96678732	-145514797	-	AluJb	SINE	Alu	-11	301	1	2
1322	1277	172	92	6	chr2	96678732	96679072	-145514457	-	L1MB8	LINE	L1	-791	5393	5023	2
1322	751	103	0	19	chr2	96696920	96697019	-145496510	-	FLAM_C	SINE	Alu	-21	122	25	2
1322	431	233	89	43	chr2	96697025	96697164	-145496365	+	MER5B	DNA	hAT-Charlie	33	178	0	2
1322	1697	141	88	4	chr2	96721508	96721777	-145471752	-	AluJo	SINE	Alu	-16	296	3	2
1322	2460	70	0	3	chr2	96721967	96722267	-145471262	-	AluY	SINE	Alu	-12	299	1	2
1322	3340	107	14	26	chr2	96722267	96722642	-145470887	-	MER1A	DNA	hAT-Charlie	-112	417	37	2
1323	2163	116	23	0	chr2	96755456	96755748	-145437781	-	AluSq2	SINE	Alu	-14	299	1	2
1323	28	0	0	0	chr2	96755748	96755775	-145437754	+	(T)n	Simple_repeat	Simple_repeat	1	27	0	2
1323	1004	87	0	0	chr2	96818424	96818550	-145374979	-	AluJr	SINE	Alu	-186	126	1	2
1323	2495	90	0	0	chr2	96849367	96849678	-145343851	+	AluSz	SINE	Alu	1	311	-1	2
1323	1840	127	0	98	chr2	96849678	96849790	-145343739	-	AluJo	SINE	Alu	-200	112	1	2
1324	2153	107	0	0	chr2	96896885	96897166	-145296363	-	AluSx1	SINE	Alu	-31	281	1	2
1324	524	234	77	82	chr2	96897166	96897321	-145296208	+	L2a	LINE	L2	3268	3425	-1	2
1324	671	158	46	24	chr2	96991221	96991348	-145202181	-	FLAM_C	SINE	Alu	-12	131	2	2
1324	966	259	76	64	chr2	96991348	96991451	-145202078	-	LTR43-int	LTR	ERV1	-2833	1965	1850	2
1325	2297	84	0	0	chr2	96994075	96994372	-145199157	-	AluSc	SINE	Alu	-12	297	1	2
1325	2825	157	62	11	chr2	96994372	96994589	-145198940	-	LTR43B	LTR	ERV1	-333	239	1	2
1325	2280	117	0	7	chr2	97000989	97001289	-145192240	-	AluSx	SINE	Alu	-14	298	1	2
1344	2091	126	7	3	chr2	99588179	99588472	-142605057	-	AluJb	SINE	Alu	-13	299	6	2
1344	2392	90	3	0	chr2	99589397	99589698	-142603831	-	AluSc	SINE	Alu	-7	302	1	2
1344	286	292	9	26	chr2	99589698	99589778	-142603751	-	MIR1_Amn	SINE	MIR	-72	158	81	2
1348	2315	97	0	0	chr2	100114392	100114681	-142078848	-	AluSx1	SINE	Alu	-23	289	1	2
1349	1776	146	76	0	chr2	100172018	100172298	-142021231	-	AluSz6	SINE	Alu	-9	303	1	2
1349	2257	249	97	13	chr2	100172298	100173262	-142020267	+	L1ME3A	LINE	L1	4919	5984	-362	2
1349	1673	193	3	20	chr2	100188232	100188528	-142005001	-	AluJr	SINE	Alu	-21	291	1	2
1349	3558	170	33	19	chr2	100188528	100189185	-142004344	-	L1MB3	LINE	L1	-44	6139	5464	2
1349	2341	94	3	3	chr2	100252242	100252539	-141940990	-	AluSx	SINE	Alu	-11	301	5	2
1350	2535	98	0	3	chr2	100289430	100289735	-141903794	-	AluSc8	SINE	Alu	-7	304	1	2
1350	2349	119	0	0	chr2	100376639	100376949	-141816580	-	AluSz	SINE	Alu	-2	310	1	2
1350	2341	119	3	0	chr2	100382594	100382904	-141810625	-	AluSx1	SINE	Alu	-1	311	1	2
1350	1764	235	74	30	chr2	100382904	100383235	-141810294	+	L1ME1	LINE	L1	5823	6169	-10	2
1351	2095	138	3	3	chr2	100432282	100432587	-141760942	-	AluJb	SINE	Alu	-7	305	1	2
1351	4333	184	29	36	chr2	100432587	100432999	-141760530	+	L1MB8	LINE	L1	5768	6178	0	2
1352	2444	58	7	0	chr2	100575142	100575434	-141618095	-	AluY	SINE	Alu	-17	294	1	2
1352	2213	92	3	0	chr2	100654115	100654422	-141539107	-	AluSp	SINE	Alu	0	313	1	2
1352	2387	91	0	0	chr2	100654427	100654725	-141538804	-	AluSx	SINE	Alu	-14	298	1	2
1353	973	142	38	7	chr2	100735304	100735459	-141458070	-	AluJr	SINE	Alu	-16	296	137	2
1353	2431	216	113	67	chr2	100735459	100735711	-141457818	+	L1ME1	LINE	L1	2080	2329	-4071	2
1353	2378	102	0	3	chr2	100769876	100770189	-141423340	-	AluSx1	SINE	Alu	0	312	1	2
1354	2514	61	0	3	chr2	100847374	100847669	-141345860	-	AluYk2	SINE	Alu	-17	294	1	2
1355	2131	130	0	3	chr2	100928911	100929204	-141264325	-	AluSz6	SINE	Alu	-20	292	1	2
1355	501	280	90	65	chr2	100929204	100929344	-141264185	-	MIR	SINE	MIR	-94	168	8	2
1356	2255	50	0	0	chr2	101137325	101137585	-141055944	-	AluY	SINE	Alu	-25	286	27	2
1357	795	150	8	0	chr2	101198776	101198896	-140994633	-	FLAM_C	SINE	Alu	-10	133	13	2
1357	1959	153	0	26	chr2	101227680	101227988	-140965541	-	AluJo	SINE	Alu	-12	300	1	2
1357	2311	92	3	29	chr2	101274779	101275094	-140918435	-	AluSp	SINE	Alu	-6	307	1	2
1357	2645	68	0	0	chr2	101275105	101275416	-140918113	-	AluSc8	SINE	Alu	0	311	1	2
1358	2166	131	10	40	chr2	101323876	101324197	-140869332	-	AluSz	SINE	Alu	-1	311	1	2
1358	4300	142	32	71	chr2	101324197	101324493	-140869036	-	L1M4	LINE	L1	-3331	3313	3024	2
1359	1646	146	63	4	chr2	101505660	101505962	-140687567	-	AluJo	SINE	Alu	0	312	1	2
1360	1295	163	117	0	chr2	101608418	101608645	-140584884	-	AluSc8	SINE	Alu	-54	257	1	2
1360	1386	178	27	33	chr2	101637726	101638006	-140555523	-	AluSz6	SINE	Alu	-31	281	2	2
1361	2429	87	7	0	chr2	101769583	101769881	-140423648	-	AluSx1	SINE	Alu	-12	300	1	2
1362	2416	99	0	0	chr2	101877745	101878048	-140315481	-	AluY	SINE	Alu	-8	303	1	2
1363	2297	141	3	3	chr2	102077058	102077370	-140116159	-	AluSx1	SINE	Alu	0	312	1	2
1363	2392	198	68	61	chr2	102077370	102077715	-140115814	-	L1MEc	LINE	L1	-5266	1134	790	2
1365	2225	112	0	3	chr2	102243795	102244090	-139949439	-	AluSx	SINE	Alu	-17	295	2	2
1366	2297	112	0	0	chr2	102410356	102410650	-139782879	-	AluSz	SINE	Alu	-17	295	2	2
1366	4498	190	8	38	chr2	102410650	102411108	-139782421	+	LTR25-int	LTR	ERV1	4189	4622	-2566	2
1368	2243	131	0	10	chr2	102687783	102688081	-139505448	-	AluSx1	SINE	Alu	-17	295	1	2
1371	2236	129	3	0	chr2	103036943	103037253	-139156276	-	AluSx	SINE	Alu	0	312	2	2
1371	3109	270	65	38	chr2	103037253	103039095	-139154434	-	L1MA9	LINE	L1	-4045	3520	1950	2
1371	2345	84	0	23	chr2	103137411	103137720	-139055809	-	AluY	SINE	Alu	-9	302	1	2
1371	1992	152	3	10	chr2	103146082	103146379	-139047150	-	AluJb	SINE	Alu	-17	295	1	2
1376	1170	203	141	23	chr2	103706686	103706947	-138486582	-	AluJo	SINE	Alu	-15	297	1	2
1378	2106	122	0	0	chr2	103984287	103984557	-138208972	-	AluSg	SINE	Alu	-40	270	1	2
1382	587	202	24	16	chr2	104519018	104519142	-137674387	-	AluJr	SINE	Alu	-187	125	1	2
1383	2033	121	4	0	chr2	104694898	104695171	-137498358	-	AluSx	SINE	Alu	-6	306	33	2
1383	2198	107	0	60	chr2	104708419	104708738	-137484791	-	AluSz	SINE	Alu	-12	300	1	2
1384	2066	122	14	3	chr2	104785613	104785938	-137407591	-	AluSz	SINE	Alu	0	312	1	2
1385	1880	136	4	28	chr2	104928963	104929250	-137264279	-	AluSz	SINE	Alu	-31	281	2	2
1386	2242	115	0	0	chr2	105014777	105015063	-137178466	-	AluSx	SINE	Alu	-24	288	3	2
1386	23110	84	11	17	chr2	105015063	105015826	-137177703	-	L1PB1	LINE	L1	-3266	3053	2289	2
1386	2203	130	3	0	chr2	105060280	105060580	-137132949	-	AluSz	SINE	Alu	-11	301	1	2
1389	2123	132	0	0	chr2	105414565	105414852	-136778677	-	AluSz6	SINE	Alu	-25	287	1	2
1389	3899	161	73	80	chr2	105414852	105414924	-136778605	-	MER21B	LTR	ERVL	-794	74	2	2
1391	2405	94	0	0	chr2	105672962	105673260	-136520269	-	AluSg	SINE	Alu	-11	299	2	2
1392	2006	124	14	0	chr2	105807924	105808197	-136385332	-	AluSc	SINE	Alu	-32	277	1	2
1392	80	210	31	0	chr2	105808197	105808212	-136385317	+	(TCTC)n	Simple_repeat	Simple_repeat	4	18	0	2
1392	2513	73	0	0	chr2	105855832	105856132	-136337397	-	AluY	SINE	Alu	-10	301	2	2
1392	2108	121	3	0	chr2	105865930	105866212	-136327317	-	AluSp	SINE	Alu	-29	284	2	2
1392	346	235	89	29	chr2	105866227	105866332	-136327197	-	L1ME4a	LINE	L1	-41	6083	5972	2
1392	2363	86	10	7	chr2	105871490	105871794	-136321735	-	AluSz	SINE	Alu	-7	305	1	2
1396	2390	123	0	0	chr2	106349368	106349676	-135843853	-	AluSx	SINE	Alu	-4	308	1	2
1396	2275	87	0	28	chr2	106400399	106400716	-135792813	-	AluY	SINE	Alu	0	311	1	2
1396	311	282	139	19	chr2	106400716	106400897	-135792632	-	MIRb	SINE	MIR	-43	225	3	2
1397	2341	104	0	0	chr2	106549260	106549558	-135643971	-	AluSz	SINE	Alu	-14	298	1	2
1397	2133	200	77	79	chr2	106549558	106549714	-135643815	+	L1ME1	LINE	L1	5862	6007	-167	2
1398	2230	116	0	3	chr2	106574234	106574527	-135619002	-	AluSx1	SINE	Alu	-19	293	2	2
1398	2331	83	0	24	chr2	106629065	106629380	-135564149	-	AluY	SINE	Alu	0	311	1	2
1398	1287	198	21	90	chr2	106629380	106629603	-135563926	-	MER2	DNA	TcMar-Tigger	-123	222	7	2
1398	2187	101	31	3	chr2	106662203	106662489	-135531040	-	AluSc8	SINE	Alu	-17	294	1	2
1398	981	264	86	7	chr2	106662489	106662779	-135530750	-	L1ME3B	LINE	L1	-342	5900	5582	2
1399	2266	125	0	0	chr2	106776347	106776658	-135416871	-	AluSz	SINE	Alu	-1	311	1	2
1399	1703	176	70	150	chr2	106776658	106776687	-135416842	+	MER34A	LTR	ERV1	490	518	-53	2
1400	2277	108	3	13	chr2	106893758	106894065	-135299464	-	AluY	SINE	Alu	-7	304	1	2
1401	2105	135	3	0	chr2	107029415	107029703	-135163826	-	AluSx	SINE	Alu	-23	289	1	2
1401	17	93	0	75	chr2	107029703	107029716	-135163813	+	(TTTAA)n	Simple_repeat	Simple_repeat	1	12	0	2
1405	2318	102	0	0	chr2	107482206	107482499	-134711030	-	AluSx3	SINE	Alu	-16	295	3	2
1405	1627	297	37	26	chr2	107482513	107483295	-134710234	-	L1MEf	LINE	L1	-4483	1932	1142	2
1406	2328	105	3	0	chr2	107712633	107712928	-134480601	-	AluSx	SINE	Alu	-16	296	1	2
1406	18	199	0	23	chr2	107712928	107712958	-134480571	+	(TA)n	Simple_repeat	Simple_repeat	1	29	0	2
1407	2094	121	17	7	chr2	107748812	107749110	-134444419	-	AluSx1	SINE	Alu	-7	305	5	2
1407	1302	291	144	54	chr2	107749110	107749832	-134443697	+	MamGypsy2-I	LTR	Gypsy	2982	3778	-388	2
1407	2523	107	0	0	chr2	107808362	107808672	-134384857	-	AluSq2	SINE	Alu	-3	310	1	2
1433	2361	105	16	0	chr2	111177484	111177789	-131015740	-	AluSg	SINE	Alu	0	310	1	2
1433	1721	144	48	11	chr2	111268380	111268643	-130924886	-	AluSz6	SINE	Alu	-39	273	1	2
1433	1906	150	115	19	chr2	111268645	111269006	-130924523	-	MER21A	LTR	ERVL	-531	400	1	2
1434	1052	199	0	0	chr2	111389356	111389527	-130804002	-	AluJb	SINE	Alu	-12	300	130	2
1434	20	0	36	0	chr2	111389527	111389555	-130803974	+	(CTTTT)n	Simple_repeat	Simple_repeat	1	29	0	2
1435	2386	94	3	0	chr2	111446526	111446825	-130746704	-	AluSx3	SINE	Alu	-11	300	1	2
1436	2049	147	3	0	chr2	111614653	111614946	-130578583	-	AluSz	SINE	Alu	-18	294	1	2
1437	2388	96	0	10	chr2	111718319	111718632	-130474897	-	AluSc8	SINE	Alu	-1	310	1	2
1437	2084	127	0	23	chr2	111751977	111752276	-130441253	-	AluSx1	SINE	Alu	-20	292	1	2
1437	2508	257	49	44	chr2	111752276	111752848	-130440681	+	L1MD2	LINE	L1	205	1015	-5618	2
1439	2240	118	3	3	chr2	111953571	111953875	-130239654	-	AluSx1	SINE	Alu	-8	304	1	2
1439	2252	109	3	3	chr2	112005878	112006181	-130187348	-	AluSz	SINE	Alu	-9	303	1	2
1440	2269	106	7	3	chr2	112079926	112080228	-130113301	-	AluSz	SINE	Alu	-9	303	1	2
1440	4882	150	40	41	chr2	112080228	112080245	-130113284	-	L1MA7	LINE	L1	-960	5331	5321	2
1440	2704	48	0	6	chr2	112080245	112080558	-130112971	-	AluY	SINE	Alu	0	311	1	2
1442	2549	81	0	0	chr2	112365489	112365796	-129827733	-	AluY	SINE	Alu	-4	307	1	2
1442	397	256	149	12	chr2	112365796	112365980	-129827549	-	MIRb	SINE	MIR	-43	225	3	2
1537	2508	84	0	3	chr2	124813057	124813376	-117380153	-	AluY	SINE	Alu	0	311	1	2
1537	24	138	0	0	chr2	124813376	124813406	-117380123	+	(T)n	Simple_repeat	Simple_repeat	1	30	0	2
1749	2452	97	3	0	chr2	152601288	152601599	-89591930	-	AluSx1	SINE	Alu	0	312	1	2
1749	2357	82	3	3	chr2	152616327	152616620	-89576909	-	AluSx	SINE	Alu	-9	303	11	2
1750	2564	57	0	10	chr2	152738986	152739284	-89454245	-	AluY	SINE	Alu	-16	295	1	2
1750	10309	104	35	39	chr2	152739284	152739716	-89453813	-	THE1B-int	LTR	ERVL-MaLR	-1151	429	1	2
1750	1644	194	13	26	chr2	152740094	152740398	-89453131	-	AluJb	SINE	Alu	-12	300	1	2
1750	2539	84	0	0	chr2	152810001	152810309	-89383220	-	AluY	SINE	Alu	-3	308	1	2
1750	12301	163	25	55	chr2	152810309	152810554	-89382975	-	L1M2	LINE	L1	-3750	3095	2893	2
1752	2484	93	3	0	chr2	152976313	152976623	-89216906	-	AluSq2	SINE	Alu	-2	311	1	2
1752	393	240	97	62	chr2	152976624	152976888	-89216641	+	L1ME3G	LINE	L1	62	230	-694	2
1752	1592	206	24	0	chr2	153074751	153075032	-89118497	-	AluJr	SINE	Alu	-24	288	1	2
1752	4097	231	141	27	chr2	153075032	153076273	-89117256	-	L1MC5	LINE	L1	-1058	8246	6847	2
1754	1829	153	60	0	chr2	153306753	153307034	-88886495	-	AluSz	SINE	Alu	-12	300	2	2
1759	2387	76	17	0	chr2	153936726	153937016	-88256513	-	AluSc8	SINE	Alu	-16	295	1	2
1759	208	331	154	103	chr2	153937016	153937097	-88256432	-	L2	LINE	L2	-601	2818	2726	2
1760	2146	128	0	3	chr2	154088464	154088752	-88104777	-	AluSq2	SINE	Alu	-26	287	1	2
1762	2174	116	0	0	chr2	154313474	154313750	-87879779	-	AluSc	SINE	Alu	-31	278	3	2
1765	2163	106	7	3	chr2	154779556	154779839	-87413690	-	AluSc	SINE	Alu	-25	284	1	2
1766	1575	88	0	34	chr2	154811386	154811591	-87381938	-	AluSx4	SINE	Alu	-112	198	1	2
1767	2284	93	0	26	chr2	154947520	154947831	-87245698	-	AluY	SINE	Alu	-8	303	1	2
1776	2454	75	13	3	chr2	156118096	156118403	-86075126	-	AluY	SINE	Alu	-1	310	1	2
1840	2337	88	14	3	chr2	164574241	164574535	-77618994	-	AluSc	SINE	Alu	-12	297	1	2
1842	2188	121	0	26	chr2	164819815	164820128	-77373401	-	AluSz6	SINE	Alu	-2	310	6	2
1842	1736	195	0	3	chr2	164820228	164820520	-77373009	-	AluJb	SINE	Alu	-21	291	1	2
1842	2303	91	0	0	chr2	164860376	164860652	-77332877	-	AluSq2	SINE	Alu	-36	277	2	2
1842	1929	175	3	7	chr2	164860654	164860951	-77332578	-	AluJo	SINE	Alu	-16	296	1	2
1844	1810	179	0	63	chr2	165119061	165119205	-77074324	-	AluJb	SINE	Alu	-186	126	1	2
1848	2532	70	0	0	chr2	165559788	165560086	-76633443	-	AluYj4	SINE	Alu	-1	310	13	2
1850	1592	192	67	3	chr2	165849308	165849600	-76343929	-	AluJb	SINE	Alu	0	312	1	2
1850	15963	197	58	53	chr2	165849600	165853262	-76340267	-	L1MA6	LINE	L1	-1333	6229	2379	2
1929	2239	122	3	0	chr2	176209285	176209588	-65983941	-	AluSz	SINE	Alu	-8	304	1	2
1929	13	189	47	0	chr2	176209588	176209606	-65983923	+	(ATTTTC)n	Simple_repeat	Simple_repeat	3	20	0	2
1929	2311	100	0	0	chr2	176210195	176210485	-65983044	-	AluSg	SINE	Alu	-20	290	1	2
1929	2240	103	0	17	chr2	176217802	176218104	-65975425	-	AluSg	SINE	Alu	-11	299	3	2
1929	21	187	57	14	chr2	176218104	176218152	-65975377	+	(TATTTA)n	Simple_repeat	Simple_repeat	1	50	0	2
1929	2126	128	7	3	chr2	176230478	176230782	-65962747	-	AluSx	SINE	Alu	-7	305	1	2
1931	2148	111	48	4	chr2	176451435	176451715	-65741814	-	AluSq	SINE	Alu	-20	293	1	2
1931	2198	124	14	0	chr2	176477142	176477425	-65716104	-	AluSx	SINE	Alu	-20	292	6	2
1931	1006	297	112	70	chr2	176477425	176477631	-65715898	+	LTR16E2	LTR	ERVL	351	545	-23	2
1937	1755	167	55	21	chr2	177243522	177243804	-64949725	-	AluJr	SINE	Alu	-20	292	1	2
1938	1642	163	18	18	chr2	177414205	177414487	-64779042	-	AluJo	SINE	Alu	-9	303	22	2
1938	2300	115	0	13	chr2	177416516	177416828	-64776701	-	AluSc8	SINE	Alu	-3	308	1	2
1939	2047	133	0	56	chr2	177502407	177502730	-64690799	-	AluJb	SINE	Alu	-7	305	1	2
1939	2341	78	3	17	chr2	177522460	177522753	-64670776	-	AluSz	SINE	Alu	-23	289	1	2
1943	2311	108	0	0	chr2	178057858	178058155	-64135374	-	AluSg4	SINE	Alu	-13	297	1	2
1946	2304	107	0	7	chr2	178411441	178411741	-63781788	-	AluSg	SINE	Alu	-12	298	1	2
1946	4398	249	46	60	chr2	178411741	178411974	-63781555	+	L1MB2	LINE	L1	6124	6352	-7	2
1946	1794	154	32	0	chr2	178431010	178431312	-63762217	-	AluJr	SINE	Alu	0	312	1	2
1946	2279	104	3	3	chr2	178445731	178446030	-63747499	-	AluSz	SINE	Alu	-13	299	1	2
1946	2210	96	34	0	chr2	178446033	178446314	-63747215	-	AluSz6	SINE	Alu	-21	291	1	2
1946	2242	106	0	13	chr2	178471211	178471512	-63722017	-	AluSx1	SINE	Alu	-15	297	1	2
1946	789	124	83	0	chr2	178476720	178476841	-63716688	-	FLAM_C	SINE	Alu	-10	133	2	2
1946	2881	148	21	33	chr2	178476841	178477005	-63716524	-	L1MB2	LINE	L1	-378	5793	5634	2
1947	2364	102	0	7	chr2	178648406	178648709	-63544820	-	AluSz	SINE	Alu	-11	301	1	2
1947	215	368	91	49	chr2	178648709	178648989	-63544540	+	L2c	LINE	L2	3082	3379	-8	2
1950	1883	124	84	3	chr2	179005624	179005907	-63187622	-	AluSz	SINE	Alu	-2	310	3	2
1951	2563	75	0	0	chr2	179086156	179086461	-63107068	-	AluY	SINE	Alu	-6	305	1	2
1951	14226	106	24	16	chr2	179086461	179087355	-63106174	-	L1MA2	LINE	L1	-2357	5208	4314	2
1952	2132	82	27	59	chr2	179291672	179291978	-62901551	-	AluSx1	SINE	Alu	-16	296	1	2
1952	4584	193	31	55	chr2	179291978	179292299	-62901230	-	MER45B	DNA	hAT-Tip100	-718	322	2	2
1952	2151	122	0	13	chr2	179292897	179293199	-62900330	-	AluSz	SINE	Alu	-8	304	7	2
1952	318	229	30	166	chr2	179293199	179293244	-62900285	+	MLT1B	LTR	ERVL-MaLR	359	392	-4	2
1955	1045	43	0	0	chr2	179676391	179676508	-62517021	-	AluY	SINE	Alu	-179	132	16	2
1955	518	270	43	38	chr2	179676527	179676712	-62516817	-	L2a	LINE	L2	-586	2833	2648	2
1957	2354	82	0	14	chr2	179878724	179879018	-62314511	-	AluY	SINE	Alu	-21	290	1	2
1963	2223	122	0	10	chr2	180665408	180665712	-61527817	-	AluSx	SINE	Alu	-11	301	1	2
1963	7941	127	11	63	chr2	180665712	180666076	-61527453	+	L1PA16	LINE	L1	4684	5040	-1106	2
1966	1623	192	27	10	chr2	181110655	181110946	-61082583	-	AluJb	SINE	Alu	-15	297	2	2
1971	2184	114	10	3	chr2	181696920	181697218	-60496311	-	AluSc8	SINE	Alu	-11	300	1	2
1971	3523	168	53	21	chr2	181697218	181697888	-60495641	-	L1MB3	LINE	L1	-41	6142	5450	2
1971	2103	124	3	3	chr2	181745374	181745657	-60447872	-	AluSz6	SINE	Alu	-29	283	1	2
1971	1907	108	0	4	chr2	181763859	181764108	-60429421	-	AluSx1	SINE	Alu	-63	249	2	2
1973	1639	171	4	57	chr2	182023628	182023926	-60169603	-	AluJr	SINE	Alu	-21	291	10	2
1973	1132	295	145	24	chr2	182023926	182024578	-60168951	+	HAL1b	LINE	L1	1373	2129	-292	2
1973	1772	188	14	10	chr2	182039391	182039683	-60153846	-	AluJb	SINE	Alu	-18	294	2	2
1973	5754	134	7	4	chr2	182039683	182041227	-60152302	-	L1PB3	LINE	L1	-27	6127	4577	2
1978	2155	114	0	4	chr2	182670837	182671118	-59522411	-	AluSz	SINE	Alu	-32	280	1	2
1978	290	195	11	16	chr2	182671118	182671175	-59522354	-	MER5A1	DNA	hAT-Charlie	-123	66	15	2
1978	2419	98	0	0	chr2	182709887	182710194	-59483335	-	AluSc5	SINE	Alu	-2	307	1	2
1979	1792	161	42	10	chr2	182816141	182816440	-59377089	-	AluJb	SINE	Alu	-2	310	2	2
971	2218	111	0	3	chr3	50688474	50688763	-147606796	-	AluSx	SINE	Alu	-24	288	1	2
971	17481	87	32	18	chr3	50688763	50689251	-147606308	-	Charlie3	DNA	hAT-Charlie	-1936	770	268	2
971	2317	116	0	3	chr3	50693525	50693836	-147601723	-	AluSx1	SINE	Alu	-2	310	1	2
971	5217	181	32	47	chr3	50693836	50693982	-147601577	-	L1MB3	LINE	L1	-1781	4365	4222	2
972	683	143	0	0	chr3	50732990	50733081	-147562478	-	AluJb	SINE	Alu	-221	91	1	2
972	2441	92	3	0	chr3	50796331	50796637	-147498922	-	AluSp	SINE	Alu	-6	307	1	2
972	10637	154	27	18	chr3	50796637	50797446	-147498113	-	L1PA13	LINE	L1	-5062	1723	887	2
973	2526	74	0	0	chr3	50868977	50869273	-147426286	-	AluY	SINE	Alu	-15	296	1	2
973	16354	125	46	28	chr3	50869273	50869342	-147426217	-	L1MA2	LINE	L1	-2947	4618	4560	2
973	2089	99	0	7	chr3	50925824	50926097	-147369462	-	AluSz	SINE	Alu	-6	306	36	2
973	1502	210	46	37	chr3	50926097	50926249	-147369310	-	MER65C	LTR	ERV1	-309	152	2	2
974	1755	161	0	62	chr3	51079320	51079642	-147215917	-	AluJb	SINE	Alu	0	312	11	2
975	1934	166	3	3	chr3	51130709	51131005	-147164554	-	AluSx	SINE	Alu	-14	298	3	2
975	36043	67	15	10	chr3	51131005	51132505	-147163054	-	HERVL-int	LTR	ERVL	-3384	2270	773	2
975	1779	154	26	16	chr3	51154966	51155272	-147140287	-	AluJr4	SINE	Alu	-3	309	1	2
977	2205	115	3	0	chr3	51504345	51504641	-146790918	-	AluSx1	SINE	Alu	-9	303	7	2
978	2295	124	0	0	chr3	51524724	51525031	-146770528	-	AluSx3	SINE	Alu	-4	307	1	2
978	5585	172	39	38	chr3	51525031	51525883	-146769676	-	L1MB3	LINE	L1	-41	6142	5281	2
[truncated: 9,022 more rows]

## Sheet: SIR(HJs)
#bin	swScore	milliDiv	milliDel	milliIns	genoName	genoStart	genoEnd	genoLeft	strand	repName	repClass	repFamily	repStart	repEnd	repLeft	id
650	584	305	108	18	chr1	8533046	8533323	-240423099	+	MLT1J	LTR	ERVL-MaLR	153	457	-55	1
675	1573	251	57	56	chr1	11866157	11866363	-237090059	-	MLT1B	LTR	ERVL-MaLR	-203	264	48	1
692	2557	164	72	77	chr1	14099299	14099913	-234856509	+	LTR36	LTR	ERV1	1	611	0	2
769	3549	161	25	36	chr1	24181350	24181916	-224774506	+	MER54B	LTR	ERVL	115	678	-115	4
838	1842	162	40	83	chr1	33238604	33239002	-215717420	+	MLT1B	LTR	ERVL-MaLR	1	380	-10	6
845	1895	166	59	24	chr1	34174427	34174803	-214781619	+	MLT1B	LTR	ERVL-MaLR	1	390	0	6
872	1419	206	31	113	chr1	37714537	37714963	-211241459	+	MLT1B	LTR	ERVL-MaLR	1	390	0	7
910	3123	141	89	52	chr1	42619351	42619922	-206336500	-	LTR49	LTR	ERV1	-1	594	1	8
960	3285	142	49	3	chr1	49276403	49276968	-199679454	+	LTR49	LTR	ERV1	3	594	-1	9
1056	1643	211	75	83	chr1	61790813	61791161	-187165261	-	MLT1E2	LTR	ERVL-MaLR	-119	508	137	1
1107	3297	123	74	7	chr1	68467946	68468501	-180487921	-	LTR49	LTR	ERV1	0	595	1	1
1129	1593	240	6	29	chr1	71316599	71316946	-177639476	-	MLT1F1	LTR	ERVL-MaLR	-226	343	5	1
1144	2747	183	20	9	chr1	73310700	73311247	-175645175	+	LTR38	LTR	ERV1	3	555	-1	1
1163	1947	193	20	20	chr1	75844789	75845185	-173111237	-	MSTD	LTR	ERVL-MaLR	0	396	1	1
1184	1921	227	91	40	chr1	78521874	78522466	-170433956	-	MLT1E2	LTR	ERVL-MaLR	-2	625	1	1
1193	932	323	52	9	chr1	79805523	79805873	-169150549	+	MLT1J	LTR	ERVL-MaLR	23	388	-124	1
1238	1707	196	41	44	chr1	85710283	85710672	-163245750	+	MLT1B	LTR	ERVL-MaLR	3	390	0	1
1238	1707	196	41	44	chr1	85710283	85710672	-163245750	+	MLT1B	LTR	ERVL-MaLR	3	390	0	1
1252	4270	128	42	0	chr1	87453519	87454185	-161502237	-	MER50B	LTR	ERV1	0	697	3	1
1305	2011	140	96	15	chr1	94400798	94401189	-154555233	+	MSTC	LTR	ERVL-MaLR	1	426	-2	1
1337	1845	184	69	3	chr1	98684273	98684654	-150271768	-	MLT1A1	LTR	ERVL-MaLR	0	408	1	1
1375	12210	176	12	2	chr1	103652052	103654730	-145301692	-	HERVE_a-int	LTR	ERV1	-4267	3580	767	1
1375	12210	176	12	2	chr1	103652052	103654730	-145301692	-	HERVE_a-int	LTR	ERV1	-4267	3580	767	1
1376	12200	177	12	2	chr1	103697239	103699917	-145256505	+	HERVE_a-int	LTR	ERV1	767	3580	-4267	1
1376	12200	177	12	2	chr1	103697239	103699917	-145256505	+	HERVE_a-int	LTR	ERV1	767	3580	-4267	1
1376	12171	177	12	2	chr1	103746190	103748868	-145207554	-	HERVE_a-int	LTR	ERV1	-4267	3580	767	1
1376	12171	177	12	2	chr1	103746190	103748868	-145207554	-	HERVE_a-int	LTR	ERV1	-4267	3580	767	1
1487	3885	75	2	77	chr1	118232872	118233433	-130722989	+	LTR12F	LTR	ERV1	1	519	0	2
1494	1470	229	78	47	chr1	119259944	119260431	-129695991	-	MLT1D	LTR	ERVL-MaLR	0	505	3	2
1776	18912	90	20	19	chr1	156187722	156188067	-92768355	-	HERVK22-int	LTR	ERVK	-4156	2681	2329	2
1812	2362	174	54	48	chr1	160911945	160912440	-88043982	-	MLT1D	LTR	ERVL-MaLR	-7	498	1	2
1843	2065	179	37	68	chr1	164909174	164909618	-84046804	-	LTR49	LTR	ERV1	-366	537	107	2
1884	1934	160	26	31	chr1	170263265	170263651	-78692771	-	MLT1B	LTR	ERVL-MaLR	-6	384	1	2
1922	2440	170	9	72	chr1	175298561	175299036	-73657386	+	MER65A	LTR	ERV1	1	445	0	2
2000	20010	104	16	7	chr1	185581524	185584696	-63371726	-	HERVK22-int	LTR	ERVK	0	6837	2327	2
2109	835	282	92	85	chr1	199813181	199813640	-49142782	+	MLT1J2	LTR	ERVL-MaLR	3	442	-2	2
2122	3210	141	45	23	chr1	201519080	201519488	-47436934	-	LTR49	LTR	ERV1	-168	427	1	2
2146	1924	187	58	54	chr1	204675267	204675770	-44280652	-	MLT1D	LTR	ERVL-MaLR	0	505	1	3
2180	2770	148	52	80	chr1	209158669	209159280	-39797142	+	LTR49	LTR	ERV1	1	593	-2	3
2201	5448	99	31	42	chr1	211854606	211855453	-37100969	-	LTR1A2	LTR	ERV1	0	837	1	3
2206	289	314	78	34	chr1	212491799	212492007	-36464415	+	MLT1L	LTR	ERVL-MaLR	1	218	-294	3
2300	2181	172	32	0	chr1	224815820	224816215	-24140207	-	MLT1A1	LTR	ERVL-MaLR	0	408	1	3
2303	33589	89	11	2	chr1	225223324	225226602	-23729820	+	HERVK22-int	LTR	ERVK	2314	5631	-1206	3
2346	2636	134	21	30	chr1	230833547	230833979	-18122443	+	MSTC	LTR	ERVL-MaLR	1	428	0	3
2361	4170	180	22	72	chr1	232796174	232797125	-16159297	+	MER4D	LTR	ERV1	1	903	0	3
2367	2563	265	133	83	chr1	233653877	233655516	-15300906	+	MLT1A0-int	LTR	ERVL-MaLR	2	1735	0	3
2381	2549	146	0	20	chr1	235531903	235532220	-13424202	-	MLT1B	LTR	ERVL-MaLR	0	390	79	3
2397	1610	173	95	22	chr1	237580655	237581016	-11375406	+	MLT1B	LTR	ERVL-MaLR	1	390	0	3
2400	1381	242	62	54	chr1	238024857	238025341	-10931081	-	MLT1D	LTR	ERVL-MaLR	-10	495	8	3
2409	25236	185	51	44	chr1	239184169	239185517	-9770905	-	ERV24B_Prim-int	LTR	ERV1	-3122	3690	2319	3
2433	2440	169	110	22	chr1	242321044	242321293	-6635129	+	LTR49	LTR	ERV1	2	262	-333	3
2437	404	189	126	0	chr1	242865137	242865227	-6091195	+	MLT1B	LTR	ERVL-MaLR	1	103	-287	3
714	858	189	24	6	chr2	16976542	16976707	-225216822	+	MLT1D	LTR	ERVL-MaLR	338	505	0	1
763	2024	156	80	35	chr2	23455795	23456166	-218737363	+	MLT1B	LTR	ERVL-MaLR	2	390	0	1
813	813	291	26	75	chr2	29987848	29988208	-212205321	+	LTR16C	LTR	ERVL	148	489	0	1
840	1581	238	51	30	chr2	33423453	33423894	-208769635	-	MLT1C	LTR	ERVL-MaLR	-12	455	5	1
958	2233	169	28	30	chr2	48920557	48920959	-193272570	-	MLT1A1	LTR	ERVL-MaLR	-7	401	1	1
992	1908	172	44	21	chr2	53416188	53416567	-188776962	+	MLT1B	LTR	ERVL-MaLR	2	389	-1	1
1076	3073	193	77	6	chr2	64421488	64422113	-177771416	-	MLT1E1A	LTR	ERVL-MaLR	-5	675	3	2
1086	501	217	254	63	chr2	65710458	65710802	-176482727	+	MLT1J	LTR	ERVL-MaLR	81	497	-15	2
1129	48501	94	21	3	chr2	71388646	71395356	-170798173	+	HERVK22-int	LTR	ERVK	3	6837	0	2
1134	748	312	73	74	chr2	71991390	71992183	-170201346	-	LTR104_Mam	LTR	Gypsy	-416	1093	302	2
1324	2380	152	35	17	chr2	96987408	96987830	-145205699	-	LTR43B	LTR	ERV1	-142	430	1	2
1338	2037	159	46	3	chr2	98768829	98769200	-143424329	-	MLT1B	LTR	ERVL-MaLR	-2	388	1	2
1373	1548	184	67	40	chr2	103411597	103411975	-138781554	+	MLT1B	LTR	ERVL-MaLR	1	389	-1	2
1496	480	158	0	35	chr2	119530264	119530349	-122663180	+	ERV24_Prim-int	LTR	ERV1	1384	1465	-4722	2
1496	480	158	0	35	chr2	119530264	119530349	-122663180	+	ERV24_Prim-int	LTR	ERV1	1384	1465	-4722	2
1522	1496	192	31	82	chr2	122841713	122842212	-119351317	+	LOR1-int	LTR	ERV1	3763	4054	-4066	2
1549	1982	211	23	16	chr2	126420372	126420795	-115772734	+	MSTB	LTR	ERVL-MaLR	1	426	0	2
1553	4259	149	74	37	chr2	127005050	127005803	-115187726	+	LTR39	LTR	ERV1	1	783	0	2
1561	2477	158	36	54	chr2	128036270	128036753	-114156776	-	MER4D	LTR	ERV1	-429	474	1	2
1563	2275	171	91	29	chr2	128222817	128223232	-113970297	-	LTR49	LTR	ERV1	-1	594	136	2
1563	2275	171	91	29	chr2	128222817	128223232	-113970297	-	LTR49	LTR	ERV1	-1	594	136	2
1574	2587	178	74	9	chr2	129710158	129710713	-112482816	-	LTR49	LTR	ERV1	-1	594	1	2
1593	30465	142	9	15	chr2	132141951	132145323	-110048206	-	HERVIP10F-int	LTR	ERV1	-2622	5115	1778	2
1606	3608	143	45	64	chr2	133894399	133896001	-108297528	+	Harlequin-int	LTR	ERV1	1	1350	-3752	2
1747	1470	160	189	49	chr2	152392404	152392752	-89800777	-	MLT1A1	LTR	ERVL-MaLR	0	408	1	2
1750	39267	134	23	14	chr2	152702247	152708261	-89485268	+	HERVIP10F-int	LTR	ERV1	397	6462	-1275	2
1764	1404	184	158	101	chr2	154534723	154535010	-87658519	+	LTR49	LTR	ERV1	1	284	-311	2
1783	5741	113	6	26	chr2	157082685	157083573	-85109956	+	MER4D0	LTR	ERV1	1	870	-2	2
1792	1678	239	99	53	chr2	158244252	158244840	-83948689	-	MLT1E3	LTR	ERVL-MaLR	0	624	5	2
1862	3496	188	77	1	chr2	167475048	167475724	-74717805	+	MER44C	DNA	TcMar-Tigger	1	731	-2	2
1874	1613	181	47	88	chr2	169050975	169051374	-73142155	+	MLT1B	LTR	ERVL-MaLR	3	384	-6	2
1882	53590	76	9	4	chr2	170112490	170119294	-72074235	+	HERVK22-int	LTR	ERVK	1	6837	0	2
1891	1698	161	75	23	chr2	171278097	171278440	-70915089	-	MLT1B	LTR	ERVL-MaLR	0	390	29	2
1899	1727	188	82	70	chr2	172290014	172290398	-69903131	-	MLT1B	LTR	ERVL-MaLR	-1	389	1	2
1908	12299	96	19	8	chr2	173500413	173502416	-68691113	+	MER41-int	LTR	ERV1	3113	5944	-2	2
1908	12299	96	19	8	chr2	173500413	173502416	-68691113	+	MER41-int	LTR	ERV1	3113	5944	-2	2
1929	1965	130	155	8	chr2	176265260	176265624	-65927905	+	MSTA	LTR	ERVL-MaLR	2	428	0	2
1984	2098	261	87	11	chr2	183454552	183455161	-58738368	+	MLT1E1A	LTR	ERVL-MaLR	1	659	-21	2
2006	3511	115	49	14	chr2	186307808	186308382	-55885147	-	LTR49	LTR	ERV1	0	595	1	2
2079	1238	230	120	22	chr2	195860675	195861282	-46332247	+	MamRep1151	LTR?	LTR?	40	709	0	2
2137	2405	152	10	38	chr2	203546029	203546426	-38647103	-	MLT1B	LTR	ERVL-MaLR	-4	386	1	2
2192	1669	183	20	49	chr2	210698174	210698541	-31494988	+	MLT1B	LTR	ERVL-MaLR	35	390	0	2
2196	2544	163	93	13	chr2	211269455	211269978	-30923551	-	LTR49	LTR	ERV1	-26	569	1	2
2196	2544	163	93	13	chr2	211269455	211269978	-30923551	-	LTR49	LTR	ERV1	-26	569	1	2
2201	796	313	89	50	chr2	211817552	211817993	-30375536	+	MLT1J	LTR	ERVL-MaLR	1	460	-52	2
2229	1896	162	36	41	chr2	215560256	215560648	-26632881	-	MLT1B	LTR	ERVL-MaLR	0	390	1	2
2269	1379	123	68	221	chr2	220782570	220782937	-21410592	+	MER54B	LTR	ERVL	42	342	-451	2
2299	342	299	80	38	chr2	224727882	224728302	-17465227	+	L1MEi	LINE	L1	1535	1952	-260	2
2326	36853	149	14	4	chr2	228302475	228308161	-13885368	-	HUERS-P3-int	LTR	ERV1	-2294	6625	880	2
2334	753	218	39	0	chr2	229306476	229306650	-12886879	-	MLT1B	LTR	ERVL-MaLR	-209	181	1	2
2348	20919	79	9	14	chr2	231093120	231096070	-11097459	-	HERVK22-int	LTR	ERVK	-1587	5250	2314	2
2375	1589	192	78	56	chr2	234749579	234749836	-7443693	-	MLT1A1	LTR	ERVL-MaLR	-112	296	24	2
2377	429	263	101	28	chr2	234897906	234898117	-7295412	-	MER65B	LTR	ERV1	0	473	246	2
622	830	230	81	5	chr3	4896104	4896309	-193399250	+	MER58A	DNA	hAT-Charlie	2	223	-1	2
632	1791	115	68	0	chr3	6260139	6260427	-192035132	-	LTR49	LTR	ERV1	-286	309	1	2
632	1791	115	68	0	chr3	6260139	6260427	-192035132	-	LTR49	LTR	ERV1	-286	309	1	2
676	1685	248	33	12	chr3	11986826	11987088	-186308471	+	LTR16B	LTR	ERVL	190	458	-5	2
681	6573	114	11	11	chr3	12674114	12675082	-185620477	+	LTR5_Hs	LTR	ERVK	1	968	0	2
708	1396	265	82	15	chr3	16152745	16153155	-182142404	+	LTR16C	LTR	ERVL	1	440	-49	2
811	2111	168	26	5	chr3	29741669	29742051	-168553508	-	MLT1B	LTR	ERVL-MaLR	0	390	1	2
871	2185	153	8	42	chr3	37560773	37561175	-160734384	-	MLT1B	LTR	ERVL-MaLR	0	390	3	2
880	856	296	63	28	chr3	38674708	38675028	-159620531	+	MLT1J	LTR	ERVL-MaLR	174	505	-7	2
917	1414	249	127	16	chr3	43601839	43602264	-154693295	+	LTR16B1	LTR	ERVL	2	480	0	2
980	1134	143	6	0	chr3	51861325	51861493	-146434066	+	LTR2C	LTR	ERV1	333	501	0	2
1016	2785	152	93	24	chr3	56567989	56568287	-141727272	-	LTR49	LTR	ERV1	-294	301	1	2
1048	1621	157	44	115	chr3	60805858	60805971	-137489588	-	MLT1B	LTR	ERVL-MaLR	-291	99	1	2
1083	1883	194	41	16	chr3	65344990	65345368	-132950191	+	MLT1B	LTR	ERVL-MaLR	1	388	-2	2
1148	1418	209	59	0	chr3	73858412	73858714	-124436845	-	MLT1A0	LTR	ERVL-MaLR	-1	364	44	2
1312	279	309	143	62	chr3	95340256	95340691	-102954868	-	LTR16C	LTR	ERVL	0	495	20	2
1360	52313	179	17	18	chr3	101632599	101641508	-96654051	+	HERVS71-int	LTR	ERV1	4	8909	-69	2
1393	1132	259	66	20	chr3	106010407	106010754	-92284805	+	LTR40a	LTR	ERVL	135	498	-21	2
1403	1155	262	20	17	chr3	107262823	107263118	-91032441	-	LTR40a	LTR	ERVL	-223	296	1	2
1409	1076	246	113	19	chr3	108019216	108019638	-90275921	-	MLT1C	LTR	ERVL-MaLR	0	467	1	2
1447	1225	191	179	18	chr3	113090952	113091293	-85204266	-	MLT1A1	LTR	ERVL-MaLR	0	408	1	2
1524	2028	139	34	97	chr3	123147110	123147424	-75148135	-	MLT1B	LTR	ERVL-MaLR	-66	324	4	2
1546	1698	225	45	53	chr3	126064878	126065352	-72230207	+	MLT1E3	LTR	ERVL-MaLR	155	624	0	2
1564	2268	177	15	0	chr3	128366875	128367259	-69928300	-	MLT1B	LTR	ERVL-MaLR	0	390	1	2
1580	3433	100	20	6	chr3	130473539	130474031	-67821528	+	LTR3B_	LTR	ERVK	1	499	0	2
1629	594	220	0	161	chr3	136848103	136848320	-61447239	-	MLT1E3	LTR	ERVL-MaLR	-385	239	58	2
1665	2316	189	79	0	chr3	141686137	141686602	-56608957	+	MLT1D	LTR	ERVL-MaLR	1	505	0	2
1677	404	255	78	36	chr3	143222594	143222775	-55072784	+	MLT1J2	LTR	ERVL-MaLR	72	245	-166	2
1720	3160	130	81	25	chr3	148820851	148821412	-49474147	-	LTR49	LTR	ERV1	0	595	1	2
1839	15174	123	51	18	chr3	164466837	164469504	-33826055	+	MER4-int	LTR	ERV1	3837	6597	-1	2
1947	3055	255	89	76	chr3	178605409	178606688	-19688871	+	MLT1A0-int	LTR	ERVL-MaLR	5	1651	0	2
1950	2161	175	57	70	chr3	178998225	178998779	-19296780	+	LTR49	LTR	ERV1	1	546	-49	2
1950	1869	125	63	87	chr3	179012324	179012593	-19282966	+	LTR49	LTR	ERV1	1	245	-350	2
1957	2642	132	125	30	chr3	179868486	179869019	-18426540	+	LTR49	LTR	ERV1	1	591	-4	2
2015	2177	112	48	119	chr3	187508858	187509389	-10786170	-	MER4A	LTR	ERV1	-122	643	1	2
2015	2177	112	48	119	chr3	187508858	187509389	-10786170	-	MER4A	LTR	ERV1	-122	643	1	2
2023	281	304	158	9	chr3	188514753	188514969	-9780590	-	MLT1M	LTR	ERVL-MaLR	-390	282	29	2
2078	1388	240	32	18	chr3	195718522	195718895	-2576664	+	MER4-int	LTR	ERV1	1845	2165	-4166	2
585	4533	153	97	67	chr4	95296	96112	-190118443	+	MER61-int	LTR	ERV1	4	866	-4351	2
649	860	299	88	45	chr4	8407400	8407594	-181806961	+	MLT1C	LTR	ERVL-MaLR	259	465	-2	2
650	1135	262	86	104	chr4	8559373	8559777	-181654778	+	MLT2C1	LTR	ERVL	1	396	-1	2
686	1987	223	84	70	chr4	13238816	13239433	-176975122	-	MLT1E2	LTR	ERVL-MaLR	0	627	1	2
686	1987	223	84	70	chr4	13238816	13239433	-176975122	-	MLT1E2	LTR	ERVL-MaLR	0	627	1	2
691	3191	138	15	25	chr4	13971145	13971687	-176242868	+	LTR49	LTR	ERV1	1	536	-59	2
691	3191	138	15	25	chr4	13971145	13971687	-176242868	+	LTR49	LTR	ERV1	1	536	-59	2
778	643	128	11	0	chr4	25361102	25361196	-164853359	+	HERVL18-int	LTR	ERVL	4394	4488	-1559	2
783	1831	165	27	53	chr4	25994215	25994367	-164220188	+	MLT1B	LTR	ERVL-MaLR	23	176	-214	2
783	1831	165	27	53	chr4	25994215	25994367	-164220188	+	MLT1B	LTR	ERVL-MaLR	23	176	-214	2
800	3643	74	2	0	chr4	28286091	28286552	-161928003	+	LTR2	LTR	ERV1	1	462	-1	2
866	6846	116	94	7	chr4	36894896	36896654	-153317901	+	HUERS-P3b-int	LTR	ERV1	747	2658	-4760	2
935	2709	222	45	6	chr4	45988343	45988982	-144225573	+	MER67C	LTR	ERV1	47	711	0	2
1029	2537	168	96	6	chr4	58216482	58216991	-131997564	+	LTR49	LTR	ERV1	1	560	-35	2
1069	4127	175	58	8	chr4	63487273	63488026	-126726529	+	MER54B	LTR	ERVL	1	793	0	2
1074	374	325	58	46	chr4	64205311	64205550	-126009005	+	MER101B	LTR	ERV1	58	299	-271	2
1078	4228	109	12	0	chr4	64623743	64624339	-125590216	-	HERVK22-int	LTR	ERVK	-3907	2930	2328	2
1084	665	300	86	39	chr4	65462369	65462858	-124751697	-	MLT1H	LTR	ERVL-MaLR	-8	547	12	2
1098	1099	311	32	32	chr4	67367105	67367310	-122847245	-	MLT1J2	LTR	ERVL-MaLR	-245	203	7	2
1118	958	255	28	66	chr4	69950852	69951154	-120263401	-	MLT1C	LTR	ERVL-MaLR	0	467	178	2
1202	786	292	136	38	chr4	80946182	80946630	-109267925	-	MLT1J	LTR	ERVL-MaLR	-13	499	1	2
1259	3275	125	99	16	chr4	88352123	88352668	-101861887	-	LTR49	LTR	ERV1	0	595	1	2
1266	2904	146	111	4	chr4	89376663	89377194	-100837361	+	LTR49	LTR	ERV1	1	595	0	2
1269	982	274	94	121	chr4	89705807	89706595	-100507960	-	HERV16-int	LTR	ERVL	-3007	2219	1455	2
1277	1502	224	92	41	chr4	90788316	90788758	-99425797	-	MLT1C	LTR	ERVL-MaLR	0	467	1	2
1394	21945	95	19	1	chr4	106111051	106114188	-84100367	+	HERVK22-int	LTR	ERVK	2314	6837	0	2
1412	4376	131	19	23	chr4	108525384	108526124	-81688431	+	Tigger2	DNA	TcMar-Tigger	1062	1798	-920	2
1465	1193	232	48	84	chr4	115457705	115458072	-74756483	-	MLT1B	LTR	ERVL-MaLR	-24	366	14	2
1466	1476	236	47	3	chr4	115581097	115581446	-74633109	+	MLT1A0	LTR	ERVL-MaLR	1	365	0	2
1526	3055	143	81	21	chr4	123378779	123379338	-66835217	+	LTR49	LTR	ERV1	1	595	0	2
1542	1230	249	95	85	chr4	125543116	125543466	-64671089	+	MLT1E	LTR	ERVL-MaLR	1	429	-224	2
1581	2741	138	30	7	chr4	130593129	130593590	-59620965	+	LTR49	LTR	ERV1	1	472	-123	2
1587	1136	226	80	46	chr4	131428780	131429104	-58785451	+	MLT1A0	LTR	ERVL-MaLR	18	353	-12	2
1607	18590	105	24	1	chr4	133994045	133996649	-56217906	-	HERVK22-int	LTR	ERVK	-4171	2666	1	2
1633	3969	45	0	0	chr4	137486581	137487044	-52727511	+	LTR2	LTR	ERV1	1	463	0	2
1646	2375	150	58	61	chr4	139153480	139154137	-51060418	+	MER4CL34	LTR	ERV1	18	872	0	2
1661	497	288	102	68	chr4	141110216	141110423	-49104132	+	MER34B	LTR	ERV1	183	408	-157	2
1682	2905	154	57	48	chr4	143854521	143855126	-46359429	-	LTR36	LTR	ERV1	0	611	1	2
1683	2903	158	54	46	chr4	143975424	143976030	-46238525	-	LTR36	LTR	ERV1	0	611	1	2
1684	2808	156	64	48	chr4	144078626	144079227	-46135328	-	LTR36	LTR	ERV1	0	611	1	2
1709	1764	181	110	3	chr4	147415827	147416175	-42798380	+	MLT1B	LTR	ERVL-MaLR	1	390	0	2
1710	1075	267	46	12	chr4	147569488	147569742	-42644813	+	LTR16B1	LTR	ERVL	6	268	-212	2
1768	1754	191	77	0	chr4	155181475	155181810	-35032745	+	MLT1A0	LTR	ERVL-MaLR	1	363	-2	3
1768	1754	191	77	0	chr4	155181475	155181810	-35032745	+	MLT1A0	LTR	ERVL-MaLR	1	363	-2	3
1776	3510	253	62	88	chr4	156172651	156174048	-34040507	-	MLT1A0-int	LTR	ERVL-MaLR	-9	1362	5	3
1792	34553	81	5	2	chr4	158294029	158298524	-31916031	+	HERVK22-int	LTR	ERVK	2314	6824	-13	3
1946	3372	222	47	21	chr4	178423577	178424344	-11790211	-	MLT1A0-int	LTR	ERVL-MaLR	-946	789	2	3
1946	994	253	33	36	chr4	178506965	178507268	-11707287	-	MLT1C	LTR	ERVL-MaLR	-4	463	162	3
1991	780	285	94	64	chr4	184341789	184342273	-5872282	-	MLT1H	LTR	ERVL-MaLR	-13	536	37	3
2024	2819	170	34	21	chr4	188699504	188700087	-1514468	-	LTR49	LTR	ERV1	0	595	5	3
635	2479	126	70	0	chr5	6562307	6562705	-174975554	+	MSTC	LTR	ERVL-MaLR	1	428	0	3
657	323	265	72	14	chr5	9528446	9528635	-172009624	+	MLT1H2	LTR	ERVL-MaLR	58	259	-290	3
669	5838	71	28	61	chr5	11065605	11066036	-170472223	+	MER4E1	LTR	ERV1	1	434	-347	3
686	1458	220	81	6	chr5	13270538	13270904	-168267355	+	MSTD	LTR	ERVL-MaLR	1	396	0	3
688	1316	188	113	62	chr5	13504284	13504653	-168033606	-	MLT1B	LTR	ERVL-MaLR	0	390	1	3
711	1943	193	31	13	chr5	16588112	16588495	-164949764	-	MLT1B	LTR	ERVL-MaLR	0	390	1	3
752	2243	233	81	62	chr5	21952733	21953493	-159584766	+	MER4E1	LTR	ERV1	1	776	-5	3
771	2989	284	48	46	chr5	24427547	24428685	-157109574	-	ERV3-16A3_I-int	LTR	ERVL	-44	5182	4042	3
876	7775	149	13	21	chr5	38206100	38206548	-143331711	+	HSMAR2	DNA	TcMar-Mariner	873	1301	-1	3
912	2038	126	236	4	chr5	42958017	42958472	-138579787	-	LTR49	LTR	ERV1	-2	593	1	3
917	2557	164	98	27	chr5	43562364	43562824	-137975435	+	LTR49	LTR	ERV1	1	494	-101	3
921	15409	128	44	23	chr5	44154461	44157727	-137380532	+	MER61-int	LTR	ERV1	379	3853	-1364	3
121	1820	219	101	40	chr5	50986558	50987087	-130551172	+	MLT1F1	LTR	ERVL-MaLR	1	565	-4	3
1074	1120	196	182	26	chr5	64224729	64225070	-117313189	+	MLT1A1	LTR	ERVL-MaLR	1	406	-2	3
1085	1312	212	23	14	chr5	65541561	65541858	-115996401	-	MLT1A0-int	LTR	ERVL-MaLR	-1434	301	2	3
1100	2665	89	32	101	chr5	67555737	67556169	-113982090	-	MLT2A1	LTR	ERVL	-44	400	1	3
1118	2226	239	78	62	chr5	69962855	69963613	-111574646	+	MER4E1	LTR	ERV1	1	771	-10	3
1120	2207	239	78	62	chr5	70154561	70155319	-111382940	-	MER4E1	LTR	ERV1	-10	771	1	3
1120	2207	239	78	62	chr5	70154561	70155319	-111382940	-	MER4E1	LTR	ERV1	-10	771	1	3
1125	2226	239	78	62	chr5	70837926	70838684	-110699575	+	MER4E1	LTR	ERV1	1	771	-10	3
1127	2201	239	78	63	chr5	71154874	71155633	-110382626	-	MER4E1	LTR	ERV1	-10	771	1	3
1127	2201	239	78	63	chr5	71154874	71155633	-110382626	-	MER4E1	LTR	ERV1	-10	771	1	3
1193	317	281	19	10	chr5	79810918	79811022	-101727237	-	LTR78	LTR	ERV1	0	1304	1200	3
1199	561	303	17	11	chr5	80602435	80602612	-100935647	+	LTR16E1	LTR	ERVL	361	538	0	3
1199	561	303	17	11	chr5	80602435	80602612	-100935647	+	LTR16E1	LTR	ERVL	361	538	0	3
1281	1666	206	52	28	chr5	91349321	91349716	-90188543	+	MLT1A1	LTR	ERVL-MaLR	4	408	0	3
1310	493	309	65	77	chr5	95087341	95087651	-86450608	-	MER102a	DNA	hAT-Charlie	-4	326	13	3
1443	1660	211	54	16	chr5	112490776	112491220	-69047039	+	MLT1C	LTR	ERVL-MaLR	6	467	0	3
1484	1125	213	43	80	chr5	117939856	117940243	-63598016	+	MLT1B	LTR	ERVL-MaLR	28	374	-16	3
1533	3030	147	71	9	chr5	124265219	124265777	-57272482	+	LTR49	LTR	ERV1	1	595	0	3
1550	1773	172	76	54	chr5	126514726	126515151	-55023108	-	MER54B	LTR	ERVL	-358	435	1	3
1550	1773	172	76	54	chr5	126514726	126515151	-55023108	-	MER54B	LTR	ERVL	-358	435	1	3
1604	1018	273	72	45	chr5	133687727	133688126	-47850133	-	MLT1J	LTR	ERVL-MaLR	-15	497	88	3
1611	3061	90	54	44	chr5	134591031	134591293	-46946966	-	MER51E	LTR	ERV1	-223	259	1	3
1655	638	301	71	32	chr5	140310921	140311377	-41226882	-	MLT1J	LTR	ERVL-MaLR	0	512	1	3
1691	3442	207	6	16	chr5	145002965	145003633	-36534626	+	MLT1A0-int	LTR	ERVL-MaLR	2	662	-1073	3
1800	3521	75	17	0	chr5	159373414	159373869	-22164390	+	LTR2	LTR	ERV1	1	463	0	3
1830	953	290	41	53	chr5	163200196	163200614	-18337645	+	MLT1L	LTR	ERVL-MaLR	193	605	-5	3
1833	3700	177	29	18	chr5	163649559	163650232	-17888027	-	MER54B	LTR	ERVL	0	793	113	3
1858	551	313	89	70	chr5	166934858	166935243	-14603016	-	MLT1L	LTR	ERVL-MaLR	-214	396	4	3
1878	1901	156	49	19	chr5	169502566	169502944	-12035315	+	MLT1B	LTR	ERVL-MaLR	1	390	0	3
1885	1855	183	49	5	chr5	170439936	170440309	-11097950	+	MLT1B	LTR	ERVL-MaLR	1	390	0	3
1909	1110	159	15	30	chr5	173654354	173654555	-7883704	-	L1PB1	LINE	L1	-6663	200	3	3
1921	2120	170	62	48	chr5	175178229	175178705	-6359554	-	LTR49	LTR	ERV1	-24	571	89	3
1960	2083	227	37	13	chr5	180274342	180274820	-1263439	+	MLT1E2	LTR	ERVL-MaLR	137	626	-1	3
1967	600	220	65	25	chr5	181144530	181144723	-393536	+	MER4-int	LTR	ERV1	1266	1442	-5156	3
596	2435	140	42	2	chr6	1463205	1463613	-169342366	+	LTR49	LTR	ERV1	1	425	-170	3
638	1274	247	96	142	chr6	6992372	6992659	-163813320	+	L1MC5	LINE	L1	8250	8495	-809	3
647	1799	183	69	91	chr6	8157724	8158272	-162647707	-	LTR49	LTR	ERV1	-49	546	12	3
715	2798	189	135	29	chr6	17088723	17089047	-153716932	+	MLT1E	LTR	ERVL-MaLR	253	652	-1	3
724	1080	198	5	5	chr6	18327576	18327779	-152478200	-	MER54B	LTR	ERVL	-490	303	101	3
741	619	325	120	41	chr6	20522971	20523407	-150282572	-	MLT1O	LTR	ERVL-MaLR	-4	538	64	3
753	726	121	50	10	chr6	22120210	22120363	-148685616	-	LTR49	LTR	ERV1	-10	777	476	3
761	49621	88	10	4	chr6	23161417	23168212	-147637767	+	HERVK22-int	LTR	ERVK	1	6837	0	3
785	3078	133	64	41	chr6	26264568	26264940	-144541039	-	LTR49	LTR	ERV1	0	595	203	3
810	890	298	68	42	chr6	29583699	29584117	-141221862	-	ERV3-16A3_I-int	LTR	ERVL	-3240	2474	2077	3
825	1167	267	69	93	chr6	31469282	31469592	-139336387	-	LTR16B2	LTR	ERVL	-140	322	1	3
880	941	267	104	49	chr6	38679807	38680239	-132125740	+	L1MEh	LINE	L1	883	1609	-626	3
880	2555	87	3	0	chr6	38680239	38680538	-132125441	+	AluSp	SINE	Alu	1	300	-13	3
946	945	182	37	32	chr6	47370799	47371015	-123434964	+	MSTB	LTR	ERVL-MaLR	194	410	-16	3
965	21358	99	5	3	chr6	49887040	49890249	-120915730	-	HERVK22-int	LTR	ERVK	-1502	5335	2294	3
1020	21086	88	17	10	chr6	57071113	57074287	-113731692	+	HERVK22-int	LTR	ERVK	2314	6837	0	3
1051	1848	201	69	61	chr6	61173913	61174458	-109631521	+	LTR49	LTR	ERV1	1	550	-45	3
1102	8330	179	41	30	chr6	67857215	67859300	-102946679	-	MER4-int	LTR	ERV1	-1484	5114	1959	3
1102	8330	179	41	30	chr6	67857215	67859300	-102946679	-	MER4-int	LTR	ERV1	-1484	5114	1959	3
1118	2604	101	217	2	chr6	69894197	69894673	-100911306	-	MER61-int	LTR	ERV1	-3311	1906	1320	3
1130	1796	201	26	21	chr6	71485164	71485342	-99320637	-	MLT1B	LTR	ERVL-MaLR	-210	180	1	3
1130	1796	201	26	21	chr6	71485164	71485342	-99320637	-	MLT1B	LTR	ERVL-MaLR	-210	180	1	3
1181	50200	88	16	5	chr6	78133559	78140229	-92665750	+	HERVK22-int	LTR	ERVK	100	6837	0	3
1189	1411	258	113	28	chr6	79173297	79173756	-91632223	+	MLT1D	LTR	ERVL-MaLR	1	503	-2	3
1225	233	204	0	20	chr6	83976311	83976361	-86829618	-	MER34C_	LTR	ERV1	-360	225	177	3
1225	233	204	0	20	chr6	83976311	83976361	-86829618	-	MER34C_	LTR	ERV1	-360	225	177	3
1226	1815	158	36	131	chr6	84044450	84044814	-86761165	-	MLT1B	LTR	ERVL-MaLR	-62	328	4	3
1244	10449	109	4	1	chr6	86500000	86501453	-84304526	-	HERVK22-int	LTR	ERVK	-3055	3782	2325	3
1244	10449	109	4	1	chr6	86500000	86501453	-84304526	-	HERVK22-int	LTR	ERVK	-3055	3782	2325	3
1316	1314	277	135	48	chr6	95930964	95931582	-74874397	-	MLT1E1A	LTR	ERVL-MaLR	0	680	1	3
1421	673	300	165	2	chr6	109688238	109688604	-61117375	+	ERVL-B4-int	LTR	ERVL	4048	4630	-1037	3
1471	1961	170	33	13	chr6	116231921	116232303	-54573676	-	MLT1B	LTR	ERVL-MaLR	0	390	1	3
1536	2019	169	3	70	chr6	124762063	124762477	-46043502	-	MLT1B	LTR	ERVL-MaLR	-2	388	3	3
1557	2485	133	30	74	chr6	127530113	127530480	-43275499	-	MSTC	LTR	ERVL-MaLR	0	428	78	3
1643	629	337	68	17	chr6	138733805	138734098	-32071881	+	MLT1O	LTR	ERVL-MaLR	56	364	-178	3
1659	3041	180	60	37	chr6	140897538	140898219	-29907760	-	MER61-int	LTR	ERV1	-4518	699	2	3
1714	1157	232	27	40	chr6	147989853	147990149	-22815830	-	MLT1E2	LTR	ERVL-MaLR	-21	606	315	3
1776	1534	243	17	44	chr6	156133968	156134445	-14671534	+	MLT1C	LTR	ERVL-MaLR	1	464	-3	3
1807	1025	137	60	77	chr6	160299571	160299793	-10506186	+	MLT1B	LTR	ERVL-MaLR	13	230	-160	3
678	2950	169	44	21	chr7	12299707	12300061	-147045912	-	LTR49	LTR	ERV1	-245	350	2	3
678	2950	169	44	21	chr7	12299707	12300061	-147045912	-	LTR49	LTR	ERV1	-245	350	2	3
707	2795	140	76	15	chr7	16034823	16035313	-143310660	+	LTR49	LTR	ERV1	71	595	0	3
715	1927	227	32	20	chr7	17134166	17134665	-142211308	+	MLT1D	LTR	ERVL-MaLR	1	505	0	3
715	1927	227	32	20	chr7	17134166	17134665	-142211308	+	MLT1D	LTR	ERVL-MaLR	1	505	0	3
768	326	243	39	86	chr7	24080897	24081059	-135264914	-	LTR37-int	LTR	ERV1	-2008	2052	1899	3
833	3671	131	7	43	chr7	32577867	32578492	-126767481	-	LTR49	LTR	ERV1	-6	589	1	3
837	1855	104	11	11	chr7	33080424	33080695	-126265278	+	LTR49	LTR	ERV1	4	274	-321	3
886	2196	136	54	24	chr7	39507282	39507658	-119838315	+	MLT1B	LTR	ERVL-MaLR	1	388	-2	3
914	3451	70	48	0	chr7	43219403	43219634	-116126339	-	LTR2	LTR	ERV1	0	463	233	3
930	3125	181	7	62	chr7	45255665	45256290	-114089683	-	ERVL-B4-int	LTR	ERVL	-5124	590	1	3
940	2338	165	101	21	chr7	46533151	46533676	-112812297	+	LTR49	LTR	ERV1	1	572	-23	3
1090	1083	159	97	71	chr7	66309840	66310183	-93035790	-	LTR49	LTR	ERV1	-66	556	173	3
1090	1083	159	97	71	chr7	66309840	66310183	-93035790	-	LTR49	LTR	ERV1	-66	556	173	3
1251	12985	189	65	76	chr7	87327417	87327754	-72018219	-	MER61-int	LTR	ERV1	-4346	871	609	3
1251	12985	189	65	76	chr7	87327417	87327754	-72018219	-	MER61-int	LTR	ERV1	-4346	871	609	3
1251	9706	178	35	8	chr7	87328261	87329677	-72016296	-	LTR25-int	LTR	ERV1	-5427	1761	319	3
1394	2293	121	101	25	chr7	106063228	106063628	-53282345	-	LTR49	LTR	ERV1	-161	434	1	3
1486	53334	71	8	1	chr7	118114570	118121364	-41224609	+	HERVK22-int	LTR	ERVK	1	6837	0	3
1487	952	288	62	33	chr7	118238843	118239104	-41106869	+	MLT1C	LTR	ERVL-MaLR	2	273	-194	3
1559	1031	264	62	6	chr7	127774974	127775310	-31570663	+	MLT1C	LTR	ERVL-MaLR	86	441	-26	3
1627	560	330	81	41	chr7	136648103	136648492	-22697481	+	MLT1I	LTR	ERVL-MaLR	5	410	-1	3
1676	3706	119	37	10	chr7	143126964	143127242	-16218731	+	LTR49	LTR	ERV1	1	288	-307	3
629	9904	112	8	3	chr8	5854781	5856206	-139282430	-	HERVK22-int	LTR	ERVK	-3082	3755	2325	3
629	9904	112	8	3	chr8	5854781	5856206	-139282430	-	HERVK22-int	LTR	ERVK	-3082	3755	2325	3
629	452	154	195	0	chr8	5878270	5878361	-139260275	-	HERVK22-int	LTR	ERVK	-4398	2439	2327	3
659	14338	91	8	2	chr8	9801085	9802982	-135335654	+	HERVK22-int	LTR	ERVK	2314	4222	-2615	3
673	2182	167	18	0	chr8	11551188	11551571	-133587065	-	MLT1B	LTR	ERVL-MaLR	0	390	1	3
689	1097	338	94	71	chr8	13733027	13734294	-131404342	-	MLT1J-int	LTR	ERVL-MaLR	-6	1381	83	3
843	2003	158	14	55	chr8	33934342	33934723	-111203913	-	MLT1B	LTR	ERVL-MaLR	-2	388	24	3
869	3901	174	79	5	chr8	37286355	37286620	-107852016	+	MER54B	LTR	ERVL	1	289	-504	3
902	2640	175	57	41	chr8	41606492	41607077	-103531559	-	LTR49	LTR	ERV1	0	595	1	3
940	19668	96	20	11	chr8	46652830	46654178	-98484458	+	HERVK22-int	LTR	ERVK	2325	3694	-3143	3
992	3317	125	114	25	chr8	53417522	53418087	-91720549	+	LTR29	LTR	ERV1	1	622	0	3
992	3317	125	114	25	chr8	53417522	53418087	-91720549	+	LTR29	LTR	ERV1	1	622	0	3
1032	3619	70	4	2	chr8	58698410	58698872	-86439764	+	LTR2	LTR	ERV1	1	463	0	3
1050	3432	285	91	85	chr8	61042796	61044827	-84093809	+	ERV3-16A3_I-int	LTR	ERVL	1607	3650	-1576	3
1107	453	235	119	50	chr8	68472344	68472587	-76666049	-	MLT1E	LTR	ERVL-MaLR	-361	319	1	3
1212	1537	234	102	25	chr8	82240367	82240809	-62897827	+	MLT1E2	LTR	ERVL-MaLR	148	627	0	3
1224	2553	187	41	25	chr8	83764248	83764825	-61373811	-	LTR49	LTR	ERV1	-1	652	1	3
1239	1926	237	79	48	chr8	85831221	85831823	-59306813	-	MLT1E3	LTR	ERVL-MaLR	0	624	3	3
1318	2086	310	36	14	chr8	96094365	96095135	-49043501	-	HERV16-int	LTR	ERVL	-2076	2920	2134	3
1352	3118	152	51	23	chr8	100646078	100646652	-44491984	-	LTR49	LTR	ERV1	-4	591	1	3
1355	1431	256	32	6	chr8	100974701	100975067	-44163569	-	ERV3-16A3_LTR	LTR	ERVL	-7	415	40	3
1395	21010	114	78	11	chr8	106258587	106261774	-38876862	-	L1PB1	LINE	L1	-2791	4071	632	3
1407	1234	307	50	25	chr8	107770601	107771086	-37367550	+	MLT1J	LTR	ERVL-MaLR	1	498	-14	3
1428	1477	189	4	4	chr8	110530446	110530701	-34607935	+	MER54B	LTR	ERVL	53	307	-486	3
1432	468	161	106	48	chr8	111065032	111065156	-34073480	+	MLT1B	LTR	ERVL-MaLR	1	132	-258	3
1439	4334	79	39	15	chr8	112052788	112053785	-33084851	-	MER11A	LTR	ERVK	0	1266	4	3
1445	1490	202	101	21	chr8	112770176	112770551	-32368085	+	MLT1A1	LTR	ERVL-MaLR	1	408	0	3
1459	246	246	157	25	chr8	114654643	114654764	-30483872	+	MLT1A	LTR	ERVL-MaLR	4	143	-231	3
1489	1787	155	92	30	chr8	118598195	118598560	-26540076	+	MLT1B	LTR	ERVL-MaLR	1	390	0	3
1495	1001	277	87	32	chr8	119318794	119319230	-25819406	+	MLT1C	LTR	ERVL-MaLR	6	467	0	3
1614	471	390	79	17	chr8	134932880	134933229	-10205407	+	MLT1N2	LTR	ERVL-MaLR	117	494	-68	3
1615	2218	182	35	10	chr8	135112342	135112757	-10025879	+	MSTB	LTR	ERVL-MaLR	1	426	0	3
597	1396	209	28	95	chr9	1671148	1671570	-136723147	-	MSTD	LTR	ERVL-MaLR	0	396	4	4
612	4431	100	11	32	chr9	3604367	3605029	-134789688	-	MER39B	LTR	ERV1	-1	652	5	4
730	1788	141	17	14	chr9	19130261	19130440	-119264277	+	LTR49	LTR	ERV1	110	287	-308	4
750	3481	130	30	24	chr9	21735970	21736519	-116658198	-	LTR49	LTR	ERV1	-41	554	1	4
750	3481	130	30	24	chr9	21735970	21736519	-116658198	-	LTR49	LTR	ERV1	-41	554	1	4
763	3082	140	93	19	chr9	23424240	23424820	-114969897	-	LTR49	LTR	ERV1	0	595	1	4
795	1326	205	170	26	chr9	27596238	27596668	-110798049	-	MLT1D	LTR	ERVL-MaLR	0	505	1	4
797	1385	244	147	67	chr9	27850249	27850819	-110543898	+	MLT1E3	LTR	ERVL-MaLR	23	646	-7	4
895	30373	139	16	5	chr9	40749311	40752615	-97642102	-	HERVIP10F-int	LTR	ERV1	-2629	5108	1778	4
1079	30339	139	17	5	chr9	64872918	64876219	-73518498	-	HERVIP10F-int	LTR	ERV1	-2629	5108	1778	4
1206	269	273	75	20	chr9	81524163	81524264	-56870453	-	MLT1J	LTR	ERVL-MaLR	-202	310	204	4
1315	373	313	53	44	chr9	95716792	95716996	-42677721	-	MLT1J	LTR	ERVL-MaLR	-297	215	10	4
1364	1577	209	87	44	chr9	102146109	102146514	-36248203	-	MER54B	LTR	ERVL	-369	424	1	4
1489	5316	92	17	21	chr9	118588152	118588929	-19805788	-	MER4E1	LTR	ERV1	0	781	8	4
1493	1872	157	46	3	chr9	119095122	119095455	-19299262	-	MLT1B	LTR	ERVL-MaLR	-1	389	42	4
1541	2009	174	13	92	chr9	125424788	125425109	-12969608	+	MLT1B	LTR	ERVL-MaLR	83	390	0	4
1571	781	301	71	16	chr9	129309122	129309375	-9085342	-	MLT1J	LTR	ERVL-MaLR	-135	377	110	4
1617	1532	211	50	16	chr9	135379371	135379741	-3014976	+	MLT1B	LTR	ERVL-MaLR	1	383	-7	4
1617	1532	211	50	16	chr9	135379371	135379741	-3014976	+	MLT1B	LTR	ERVL-MaLR	1	383	-7	4
1617	1532	211	50	16	chr9	135379371	135379741	-3014976	+	MLT1B	LTR	ERVL-MaLR	1	383	-7	4
622	1744	193	11	3	chr10	4943500	4943848	-128853574	-	LTR49	LTR	ERV1	-242	353	3	3
623	1941	169	20	11	chr10	5018295	5018643	-128778779	+	LTR49	LTR	ERV1	3	353	-242	3
806	1474	194	123	51	chr10	29087419	29087794	-104709628	+	MLT1A1	LTR	ERVL-MaLR	1	406	-2	4
806	1474	194	123	51	chr10	29087419	29087794	-104709628	+	MLT1A1	LTR	ERVL-MaLR	1	406	-2	4
877	2192	175	96	36	chr10	38277493	38277756	-95519666	-	LTR49	LTR	ERV1	-317	278	1	4
882	2260	173	96	34	chr10	38972977	38973239	-94824183	+	LTR49	LTR	ERV1	2	278	-317	4
884	5181	210	91	4	chr10	39203309	39205098	-94592324	-	HERVS71-int	LTR	ERV1	-2015	6963	5016	4
884	5181	210	91	4	chr10	39203309	39205098	-94592324	-	HERVS71-int	LTR	ERV1	-2015	6963	5016	4
937	1908	244	91	19	chr10	46261214	46261626	-87535796	+	MER101-int	LTR	ERV1	4424	4871	0	4
937	1908	244	91	19	chr10	46261214	46261626	-87535796	+	MER101-int	LTR	ERV1	4424	4871	0	4
944	2713	207	58	9	chr10	47123336	47123906	-86673516	+	MLT1A0-int	LTR	ERVL-MaLR	105	704	-1031	4
944	2713	207	58	9	chr10	47123336	47123906	-86673516	+	MLT1A0-int	LTR	ERVL-MaLR	105	704	-1031	4
988	557	354	83	30	chr10	52857935	52858404	-80939018	-	LTR86A2	LTR	ERVL	-7	501	6	4
1026	4151	101	62	2	chr10	57914534	57915140	-75882282	-	LTR9D	LTR	ERV1	0	645	1	4
1028	1352	163	69	11	chr10	58098753	58099026	-75698396	+	LTR49	LTR	ERV1	136	425	-170	4
1028	1352	163	69	11	chr10	58098753	58099026	-75698396	+	LTR49	LTR	ERV1	136	425	-170	4
1029	1617	188	110	7	chr10	58292628	58293033	-75504389	+	MLT2B4	LTR	ERVL	3	430	-34	4
1083	234	321	98	66	chr10	65340046	65340243	-68457179	-	MamGypLTR1a	LTR	Gypsy	-496	286	83	4
1143	745	295	78	93	chr10	73254509	73254939	-60542483	+	MLT1J	LTR	ERVL-MaLR	40	462	-50	4
1226	10970	183	54	59	chr10	84101561	84103860	-49693562	-	LTR49-int	LTR	ERV1	-3	6328	4042	4
1247	887	254	99	56	chr10	86804844	86805219	-46992203	-	MLT1C	LTR	ERVL-MaLR	-47	420	28	5
1257	424	361	50	42	chr10	88168147	88168373	-45629049	+	MLT1J	LTR	ERVL-MaLR	110	337	-175	5
1257	424	361	50	42	chr10	88168147	88168373	-45629049	+	MLT1J	LTR	ERVL-MaLR	110	337	-175	5
1312	3516	108	35	47	chr10	95332966	95333496	-38463926	+	LTR49	LTR	ERV1	1	528	-67	5
1332	1588	184	62	71	chr10	98033383	98033776	-35763646	+	MLT1B	LTR	ERVL-MaLR	2	390	0	5
1343	3065	121	98	43	chr10	99399023	99399488	-34397934	+	LTR49	LTR	ERV1	1	503	-92	5
1354	1005	252	69	43	chr10	100856459	100856647	-32940775	+	LTR16E1	LTR	ERVL	207	393	-145	5
1368	896	132	25	54	chr10	102720849	102721017	-31076405	+	MLT1E3	LTR	ERVL-MaLR	52	214	-410	5
1368	502	217	88	160	chr10	102720863	102721218	-31076204	+	MLT2C1	LTR	ERVL	45	521	-35	5
1368	896	132	25	54	chr10	102720849	102721017	-31076405	+	MLT1E3	LTR	ERVL-MaLR	52	214	-410	5
1368	502	217	88	160	chr10	102720863	102721218	-31076204	+	MLT2C1	LTR	ERVL	45	521	-35	5
1380	710	302	34	78	chr10	104280191	104280591	-29516831	-	MLT1J	LTR	ERVL-MaLR	-89	521	31	5
1389	1506	209	55	63	chr10	105452662	105453061	-28344361	-	MLT1A1	LTR	ERVL-MaLR	-12	396	1	5
1389	1506	209	55	63	chr10	105452662	105453061	-28344361	-	MLT1A1	LTR	ERVL-MaLR	-12	396	1	5
1396	1191	287	52	28	chr10	106329825	106330216	-27467206	+	MER92-int	LTR	ERV1	4405	4805	-413	5
1498	3645	241	56	109	chr10	119762830	119764278	-14033144	-	MLT1A0-int	LTR	ERVL-MaLR	-4	1367	1	5
639	4459	150	26	48	chr11	7086706	7087498	-127999124	+	LTR39	LTR	ERV1	6	779	-4	5
661	1588	86	86	59	chr11	10044309	10044581	-125042041	-	LTR66	LTR	ERVL	0	610	331	5
694	685	318	36	39	chr11	14378280	14378614	-120708008	+	MLT1M	LTR	ERVL-MaLR	1	333	-339	5
722	1854	155	29	60	chr11	18011193	18011591	-117075031	+	MLT1B	LTR	ERVL-MaLR	6	390	0	5
762	2269	152	43	43	chr11	23231871	23232291	-111854331	+	LTR49	LTR	ERV1	7	426	-169	6
804	665	256	101	68	chr11	28761848	28762326	-106324296	+	MLT1H	LTR	ERVL-MaLR	12	485	-20	6
1020	2148	172	21	3	chr11	57119933	57120312	-77966310	+	MLT1B	LTR	ERVL-MaLR	5	390	0	6
1074	2099	162	2	139	chr11	64175742	64175850	-70910772	+	MLT1B	LTR	ERVL-MaLR	1	109	-281	6
1082	3832	110	40	12	chr11	65185050	65185628	-69900994	-	LTR49	LTR	ERV1	0	595	1	6
1101	399	209	108	28	chr11	67705431	67705617	-67381005	-	MLT1F2	LTR	ERVL-MaLR	-196	431	247	6
1132	1617	233	167	54	chr11	71698097	71698673	-63387949	+	MLT1E1	LTR	ERVL-MaLR	1	654	0	6
1162	2659	215	56	65	chr11	75713723	75714405	-59372217	+	MER54B	LTR	ERVL	116	791	-2	6
1172	2102	151	71	83	chr11	76971556	76972098	-58114524	-	LTR49	LTR	ERV1	-69	526	1	6
1203	50354	92	7	4	chr11	81033115	81039929	-54046693	+	HERVK22-int	LTR	ERVK	1	6837	0	6
1252	3582	76	2	0	chr11	87494081	87494543	-47592079	-	LTR2	LTR	ERV1	0	463	1	7
1252	3582	76	2	0	chr11	87494081	87494543	-47592079	-	LTR2	LTR	ERV1	0	463	1	7
1324	724	317	133	29	chr11	96871585	96871968	-38214654	+	LTR16	LTR	ERVL	2	430	-8	7
1339	21640	99	17	3	chr11	98929462	98932612	-36154010	-	HERVK22-int	LTR	ERVK	-1504	5333	2314	7
1344	1437	244	27	51	chr11	99492596	99493046	-35593576	-	MER39	LTR	ERV1	0	707	269	7
1410	2613	151	81	45	chr11	108149824	108150225	-26936397	+	LTR49	LTR	ERV1	1	430	-165	7
1426	839	317	14	28	chr11	110351093	110351382	-24735240	+	MamGypsy2-I	LTR	Gypsy	2887	3171	-995	7
1495	368	269	20	45	chr11	119395304	119395460	-15691162	-	MER92-int	LTR	ERV1	-3516	1702	1551	7
1523	1096	177	163	147	chr11	123048621	123048900	-12037722	+	MLT1C	LTR	ERVL-MaLR	187	466	-1	7
1542	1913	179	204	74	chr11	125513687	125513892	-9572730	+	LTR48	LTR	ERV1	543	786	-1	7
1545	15080	123	37	18	chr11	125869313	125871008	-9215614	-	HERVIP10F-int	LTR	ERV1	-5377	2360	658	7
1568	1684	189	92	48	chr11	128887885	128888006	-6198616	-	MLT1B	LTR	ERVL-MaLR	-269	121	1	7
1575	2527	183	30	21	chr11	129784976	129785817	-5300805	-	LTR25-int	LTR	ERV1	-5560	1628	725	7
1597	4259	259	72	48	chr11	132735782	132736446	-2350176	+	MLT1F-int	LTR	ERVL-MaLR	854	1489	0	7
605	1027	233	187	44	chr12	2673484	2673826	-130601483	-	MLT1E3	LTR	ERVL-MaLR	-57	567	143	7
650	31298	85	5	1	chr12	8558450	8562470	-124712839	-	HERVK22-int	LTR	ERVK	-488	6349	2316	7
656	12566	156	8	10	chr12	9323740	9325723	-123949586	-	HERVS71-int	LTR	ERV1	-2023	6955	4977	7
788	1545	235	62	0	chr12	26642261	26642606	-106632703	+	MSTD	LTR	ERVL-MaLR	1	368	-28	8
827	2352	169	90	30	chr12	31755481	31756011	-101519298	-	LTR49	LTR	ERV1	-30	565	1	8
881	772	226	216	74	chr12	38809092	38809540	-94465769	-	MLT1E2	LTR	ERVL-MaLR	0	653	125	8
908	21177	102	16	19	chr12	42443565	42446699	-90828610	+	HERVK22-int	LTR	ERVK	2403	6833	-4	8
918	2244	130	13	91	chr12	43770752	43771182	-89504127	+	MSTD	LTR	ERVL-MaLR	1	396	0	8
920	22485	92	12	3	chr12	43976747	43979921	-89295388	-	HERVK22-int	LTR	ERVK	-1502	5335	2314	8
973	10644	146	32	64	chr12	50917729	50918470	-82356839	+	MER61-int	LTR	ERV1	609	867	-4350	8
1027	12105	113	47	29	chr12	58033025	58035152	-75240157	-	L1PBa	LINE	L1	-4687	2176	10	8
1031	2341	244	29	40	chr12	58587933	58588564	-74686745	+	MLT1E3	LTR	ERVL-MaLR	1	624	0	8
1044	895	242	77	21	chr12	60205512	60205834	-73069475	+	MSTD	LTR	ERVL-MaLR	21	396	0	8
1066	2034	169	163	10	chr12	63100726	63101229	-70174080	+	LTR49	LTR	ERV1	1	595	0	8
1136	5002	138	16	15	chr12	72334406	72335196	-60940113	-	MER54B	LTR	ERVL	-2	791	1	8
1159	2431	134	8	20	chr12	75283353	75283529	-57991780	+	MLT1B	LTR	ERVL-MaLR	1	171	-219	8
1202	265	324	86	28	chr12	80999693	80999836	-52275473	-	ERVL-B4-int	LTR	ERVL	-3657	2057	1906	8
1210	1600	319	53	22	chr12	82008653	82009425	-51265884	+	ERV3-16A3_I-int	LTR	ERVL	3916	4839	-828	8
1257	22585	97	4	5	chr12	88180077	88183278	-45092031	-	HERVK22-int	LTR	ERVK	-1502	5335	2314	9
1266	1074	252	70	36	chr12	89271233	89271414	-44003895	+	MLT1C	LTR	ERVL-MaLR	10	202	-265	9
1286	2283	154	3	63	chr12	91903148	91903379	-41371930	+	MLT1B	LTR	ERVL-MaLR	1	230	-160	9
1336	779	206	92	139	chr12	98483034	98483393	-34791916	+	MLT1E1	LTR	ERVL-MaLR	3	366	-258	9
1352	286	323	70	8	chr12	100547357	100547491	-32727818	-	MLT1J	LTR	ERVL-MaLR	-194	318	176	9
1391	2079	206	5	28	chr12	105774525	105774920	-27500389	+	MLT1B	LTR	ERVL-MaLR	3	388	-2	9
1391	2079	206	5	28	chr12	105774525	105774920	-27500389	+	MLT1B	LTR	ERVL-MaLR	3	388	-2	9
1432	22723	137	35	22	chr12	111128084	111131055	-22144254	-	ERVL-B4-int	LTR	ERVL	-1783	3931	898	9
1448	800	201	63	11	chr12	113230467	113230648	-20044661	-	MLT1B	LTR	ERVL-MaLR	-135	255	65	9
1448	2068	162	34	5	chr12	113231193	113231565	-20043744	-	MLT1B	LTR	ERVL-MaLR	-7	383	1	9
1456	1393	181	170	28	chr12	114167143	114167540	-19107769	+	MLT1E3	LTR	ERVL-MaLR	153	617	-7	9
1551	1293	247	30	8	chr12	126657659	126658014	-6617295	+	MLT1A0	LTR	ERVL-MaLR	1	363	-2	9
1582	1187	277	62	55	chr12	130685625	130686247	-2589062	+	MER92B	LTR	ERV1	1	627	-9	9
725	30217	142	10	15	chr13	18425681	18429038	-95935290	+	HERVIP10F-int	LTR	ERV1	1778	5102	-2635	9
725	30217	142	10	15	chr13	18425681	18429038	-95935290	+	HERVIP10F-int	LTR	ERV1	1778	5102	-2635	9
765	3315	158	50	7	chr13	23692533	23693133	-90671195	+	LTR24C	LTR	ERV1	1	627	-8	9
775	6747	104	9	3	chr13	24927035	24927964	-89436364	+	HERVK22-int	LTR	ERVK	2144	3077	-3760	1
850	2957	224	59	37	chr13	34810886	34811664	-79552664	+	MER92-int	LTR	ERV1	4423	5218	0	1
857	327	303	110	70	chr13	35710888	35711218	-78653110	-	MLT2C1	LTR	ERVL	0	397	53	1
857	557	256	49	13	chr13	35711092	35711250	-78653078	-	MLT1E3	LTR	ERVL-MaLR	-420	204	41	1
857	327	303	110	70	chr13	35710888	35711218	-78653110	-	MLT2C1	LTR	ERVL	0	397	53	1
857	557	256	49	13	chr13	35711092	35711250	-78653078	-	MLT1E3	LTR	ERVL-MaLR	-420	204	41	1
911	342	279	60	28	chr13	42735543	42735687	-71628641	+	LTR86B2	LTR	ERVL	339	487	0	1
969	781	270	112	27	chr13	50348872	50349200	-64015128	+	MLT1J	LTR	ERVL-MaLR	22	380	-132	1
1009	4382	173	14	21	chr13	55641544	55642343	-58721985	-	MER54B	LTR	ERVL	0	793	1	1
1009	2200	174	92	43	chr13	55673851	55674415	-58689913	-	LTR49	LTR	ERV1	0	595	1	1
1068	990	305	55	44	chr13	63421969	63422512	-50941816	-	MLT1E1A	LTR	ERVL-MaLR	-8	672	25	1
1096	2141	147	61	22	chr13	66981932	66982343	-47381985	+	MSTA	LTR	ERVL-MaLR	1	428	0	1
1115	1853	185	31	31	chr13	69472128	69472518	-44891810	-	MLT1B	LTR	ERVL-MaLR	0	390	1	1
1117	524	225	16	0	chr13	69844515	69844635	-44519693	-	MLT1A	LTR	ERVL-MaLR	-252	122	1	1
1126	20937	114	10	3	chr13	71026750	71029904	-43334424	-	HERVK22-int	LTR	ERVK	-1502	5335	2333	1
1126	20937	114	10	3	chr13	71026750	71029904	-43334424	-	HERVK22-int	LTR	ERVK	-1502	5335	2333	1
1203	3644	181	58	30	chr13	81079437	81080205	-33284123	-	MER54B	LTR	ERVL	-2	791	1	1
1213	1381	242	63	42	chr13	82398410	82398811	-31965517	-	MER92A	LTR	ERV1	-2	410	1	1
1232	1869	190	41	3	chr13	84892120	84892494	-29471834	-	MLT1B	LTR	ERVL-MaLR	0	390	2	1
1266	502	279	30	12	chr13	89380295	89380458	-24983870	+	LTR16A2	LTR	ERVL	328	493	-2	1
1294	902	282	82	42	chr13	92980680	92981017	-21383311	+	MSTD	LTR	ERVL-MaLR	1	352	-44	1
1337	1776	212	21	37	chr13	98696737	98697049	-15667279	+	MLT1B	LTR	ERVL-MaLR	7	323	-67	1
1348	1067	281	38	36	chr13	100086806	100087212	-14277116	-	MLT1J	LTR	ERVL-MaLR	-33	479	33	1
1354	2203	166	28	21	chr13	100847194	100847581	-13516747	-	MLT1B	LTR	ERVL-MaLR	0	390	1	1
1354	2203	166	28	21	chr13	100847194	100847581	-13516747	-	MLT1B	LTR	ERVL-MaLR	0	390	1	1
1359	994	219	143	70	chr13	101511334	101511911	-12852417	+	MLT1E1	LTR	ERVL-MaLR	25	646	-8	1
1368	22091	98	13	8	chr13	102668345	102671524	-11692804	-	HERVK22-int	LTR	ERVK	-1502	5335	2314	1
1408	377	333	57	46	chr13	107889540	107889801	-6474527	+	HERV16-int	LTR	ERVL	539	802	-4424	1
180	18068	152	21	6	chr13	112590275	112592191	-1772137	+	ERV24_Prim-int	LTR	ERV1	4815	6749	-826	1
725	22694	132	5	2	chr14	18354066	18357389	-88686329	+	HERVIP10F-int	LTR	ERV1	1771	5102	-2635	1
743	2228	259	81	50	chr14	20806899	20807243	-86236475	+	MER89-int	LTR	ERV1	3866	4201	-2600	1
799	1578	178	6	90	chr14	28097631	28098007	-78945711	+	MLT1B	LTR	ERVL-MaLR	47	390	0	1
800	1915	247	75	13	chr14	28274367	28274971	-78768747	+	LTR48B	LTR	ERV1	1	644	0	1
875	1753	229	79	36	chr14	38015713	38016207	-69027511	+	LTR40a	LTR	ERVL	3	519	0	1
892	2350	167	100	22	chr14	40340647	40341191	-66702527	+	LTR49	LTR	ERV1	1	591	-4	1
892	2350	167	100	22	chr14	40340647	40341191	-66702527	+	LTR49	LTR	ERV1	1	591	-4	1
911	21473	84	4	10	chr14	42804270	42807122	-64236596	+	HERVK22-int	LTR	ERVK	828	3663	-3174	1
923	5273	86	21	1	chr14	44416785	44417492	-62626226	+	HERVK22-int	LTR	ERVK	2314	3034	-3803	1
1125	4681	150	25	32	chr14	70870018	70871633	-36172085	-	MER41-int	LTR	ERV1	-395	4822	2170	1
1125	4681	150	25	32	chr14	70870018	70871633	-36172085	-	MER41-int	LTR	ERV1	-395	4822	2170	1
1138	3108	206	52	91	chr14	72504040	72504744	-34538974	-	MLT1A0-int	LTR	ERVL-MaLR	-941	794	127	1
1141	2039	147	36	41	chr14	72915964	72916071	-34127647	+	MLT1B	LTR	ERVL-MaLR	1	109	-281	1
1194	1200	201	8	13	chr14	79890999	79891236	-27152482	+	MER21-int	LTR	ERVL	3879	4114	-77	1
1208	2443	168	62	15	chr14	81787295	81787822	-25255896	-	LTR49	LTR	ERV1	-26	569	17	1
1219	4742	74	61	11	chr14	83148277	83148930	-23894788	-	LTR12_	LTR	ERV1	0	688	1	1
1251	2082	189	0	32	chr14	87319028	87319145	-19724573	-	MLT1B	LTR	ERVL-MaLR	-270	120	11	1
1254	1877	191	20	59	chr14	87728837	87729243	-19314475	+	MLT1B	LTR	ERVL-MaLR	1	390	0	1
1381	5772	77	13	14	chr14	104407822	104408604	-2635114	-	MER4E1	LTR	ERV1	0	781	1	1
764	14441	137	12	16	chr15	23504111	23505837	-78485352	-	LTR25-int	LTR	ERV1	-3	7185	5473	1
772	9413	218	37	9	chr15	24595848	24598105	-77393084	-	ERVL-B4-int	LTR	ERVL	-3382	2332	10	1
876	804	309	96	47	chr15	38175806	38176386	-63814803	-	LTR78	LTR	ERV1	-2	1302	691	1
939	269	349	64	64	chr15	46489111	46489341	-55501848	-	LTR78	LTR	ERV1	-989	315	86	1
947	226	226	79	41	chr15	47569658	47569755	-54421434	-	MamGypLTR1a	LTR	Gypsy	-681	103	3	1
982	686	225	32	13	chr15	52054520	52054673	-49936516	-	MLT1F	LTR	ERVL-MaLR	-401	168	13	1
995	4283	171	41	56	chr15	53818835	53819748	-48171441	-	MER4D	LTR	ERV1	0	903	5	1
1003	20680	103	9	11	chr15	54888009	54891167	-47100022	+	HERVK22-int	LTR	ERVK	2314	6837	0	1
1066	2076	158	41	47	chr15	63118953	63119340	-38871849	+	LTR56	LTR	ERV1	83	445	0	1
1142	1817	162	46	91	chr15	73024628	73024747	-28966442	+	MLT1B	LTR	ERVL-MaLR	3	116	-274	1
1245	2855	144	69	19	chr15	86590593	86590890	-15400299	-	LTR49	LTR	ERV1	-288	307	1	1
1272	725	240	82	58	chr15	90141200	90141559	-11849630	+	LTR56	LTR	ERV1	78	445	0	1
1306	2243	176	109	29	chr15	94522087	94522632	-7468557	-	LTR49	LTR	ERV1	-1	594	1	1
1325	813	317	57	35	chr15	97053888	97054231	-4936958	-	MLT1I	LTR	ERVL-MaLR	-3	408	58	1
1359	967	198	107	92	chr15	101567522	101567914	-423275	-	MER54B	LTR	ERVL	-450	451	59	1
626	519	307	104	33	chr16	5387336	5387639	-84950706	-	MLT1J	LTR	ERVL-MaLR	-74	438	112	1
664	5010	93	62	8	chr16	10380381	10380822	-79957523	-	MER4E1	LTR	ERV1	-315	466	1	1
681	685	262	51	114	chr16	12602574	12602721	-77735624	-	MLT1E2	LTR	ERVL-MaLR	-466	161	17	1
703	2222	191	28	15	chr16	15544546	15544960	-74793385	+	MER90	LTR	ERV1	1	426	-149	1
730	1138	271	42	45	chr16	19039389	19039656	-71298689	-	MLT1J	LTR	ERVL-MaLR	-207	305	39	1
732	2061	196	43	78	chr16	19272498	19273073	-71065272	-	MLT2B3	LTR	ERVL	0	554	1	1
823	918	263	117	58	chr16	31249614	31249834	-59088511	+	MLT1J	LTR	ERVL-MaLR	1	228	-284	1
827	3610	41	3	1	chr16	31764604	31765126	-58573219	+	L1P1	LINE	L1	4954	5479	-823	1
831	1040	169	122	107	chr16	32249055	32249346	-58088999	+	LTR47A	LTR	ERVL	129	424	-28	1
834	1069	175	118	104	chr16	32680072	32680371	-57657974	-	LTR47A	LTR	ERVL	-20	432	129	1
838	1064	175	118	104	chr16	33190022	33190321	-57148024	+	LTR47A	LTR	ERVL	129	432	-20	1
839	1064	175	118	104	chr16	33300102	33300401	-57037944	+	LTR47A	LTR	ERVL	129	432	-20	1
839	1049	179	118	104	chr16	33356635	33356934	-56981411	+	LTR47A	LTR	ERVL	129	432	-20	1
840	1049	179	118	104	chr16	33455406	33455705	-56882640	+	LTR47A	LTR	ERVL	129	432	-20	1
853	881	226	80	71	chr16	35212224	35212548	-55125797	-	LTR47A	LTR	ERVL	0	452	126	1
854	40765	192	15	3	chr16	35269044	35276525	-55061820	-	HERVS71-int	LTR	ERV1	-1252	7726	4	1
858	23689	171	7	1	chr16	35897577	35901340	-54437005	-	HERVS71-int	LTR	ERV1	-69	8909	5123	1
980	1786	232	76	45	chr16	51791517	51792053	-38546292	+	MLT1E3	LTR	ERVL-MaLR	71	624	0	1
1049	41362	82	20	22	chr16	60849943	60853181	-29485164	+	HERVL-int	LTR	ERVL	2386	5654	0	1
1082	2041	183	5	83	chr16	65255862	65256284	-25082061	-	MLT1B	LTR	ERVL-MaLR	-1	389	1	1
1131	1383	158	9	9	chr16	71609202	71609432	-18728913	+	LTR49	LTR	ERV1	1	230	-365	1
1170	2181	208	49	9	chr16	76793908	76794407	-13543938	+	MER51C	LTR	ERV1	1	560	-80	1
1221	1143	266	64	66	chr16	83398158	83398626	-6939719	-	MLT1C	LTR	ERVL-MaLR	0	467	1	1
1240	1650	247	81	23	chr16	85943927	85944449	-4393896	-	MLT1H1	LTR	ERVL-MaLR	0	555	1	1
79	1338	233	78	110	chr17	6946658	6946995	-76310446	-	MSTD	LTR	ERVL-MaLR	-55	341	1	1
669	5026	160	8	22	chr17	11118381	11119186	-72138255	-	MER54B	LTR	ERVL	0	793	1	1
675	1665	123	68	4	chr17	11852976	11853238	-71404203	-	MER54B	LTR	ERVL	-513	280	1	1
686	1176	203	60	104	chr17	13331635	13332069	-69925372	+	MLT1D	LTR	ERVL-MaLR	1	414	-91	1
749	1530	181	84	17	chr17	21526408	21526763	-61730678	+	MLT1B	LTR	ERVL-MaLR	10	390	0	1
749	1530	181	84	17	chr17	21526408	21526763	-61730678	+	MLT1B	LTR	ERVL-MaLR	10	390	0	1
818	2082	182	13	13	chr17	30547005	30547389	-52710052	+	MLT1B	LTR	ERVL-MaLR	1	384	-6	1
818	2082	182	13	13	chr17	30547005	30547389	-52710052	+	MLT1B	LTR	ERVL-MaLR	1	384	-6	1
1001	242	217	162	0	chr17	54566021	54566104	-28691337	+	LTR33	LTR	ERVL	1	99	-416	1
1207	742	171	108	98	chr17	81640747	81640847	-1616594	-	MLT1B	LTR	ERVL-MaLR	-280	110	1	1
616	2935	112	40	40	chr18	4080395	4080890	-76292395	+	LTR49	LTR	ERV1	1	503	-92	1
621	2835	168	48	48	chr18	4813632	4814200	-75559085	-	LTR36	LTR	ERV1	0	611	43	1
622	2036	201	48	50	chr18	4874670	4875172	-75498113	-	MER67A	LTR	ERV1	-39	504	4	1
629	2071	167	18	42	chr18	5873618	5874018	-74499267	+	MLT1B	LTR	ERVL-MaLR	1	390	0	1
643	258	240	48	10	chr18	7732052	7732153	-72641132	-	MLT1J	LTR	ERVL-MaLR	-4	508	404	1
701	30075	145	9	15	chr18	15310505	15313862	-65059423	-	HERVIP10F-int	LTR	ERV1	-2635	5102	1778	1
748	1924	183	8	37	chr18	21429834	21430236	-58943049	-	MLT1B	LTR	ERVL-MaLR	0	390	1	1
775	2390	128	16	3	chr18	25006807	25007167	-55366118	+	MLT1B	LTR	ERVL-MaLR	11	375	-15	1
801	2567	191	44	19	chr18	28351255	28351835	-52021450	+	LTR49	LTR	ERV1	1	595	0	1
857	3680	69	4	0	chr18	35735339	35735800	-44637485	+	LTR2	LTR	ERV1	1	463	0	1
880	1131	271	101	85	chr18	38707497	38707797	-41665488	+	LTR33	LTR	ERVL	243	515	0	1
908	3527	116	45	7	chr18	42369533	42370105	-38003180	-	LTR49	LTR	ERV1	0	595	1	1
908	623	234	62	35	chr18	42389527	42389700	-37983585	+	LTR36	LTR	ERV1	434	611	0	1
940	686	143	70	29	chr18	46589698	46589835	-33783450	+	MLT1B	LTR	ERVL-MaLR	1	143	-247	1
951	340	271	85	15	chr18	48019015	48019146	-32354139	+	MLT1N2	LTR	ERVL-MaLR	422	562	0	1
951	340	271	85	15	chr18	48019015	48019146	-32354139	+	MLT1N2	LTR	ERVL-MaLR	422	562	0	1
954	1703	173	52	3	chr18	48432781	48433095	-31940190	+	MLT1A1	LTR	ERVL-MaLR	79	408	0	1
954	1703	173	52	3	chr18	48432781	48433095	-31940190	+	MLT1A1	LTR	ERVL-MaLR	79	408	0	1
955	852	255	91	104	chr18	48596769	48596956	-31776329	-	MLT1J	LTR	ERVL-MaLR	-314	198	5	1
969	9966	179	41	12	chr18	50405271	50407886	-29965399	+	HERVS71-int	LTR	ERV1	4977	7668	-1310	1
969	9966	179	41	12	chr18	50405271	50407886	-29965399	+	HERVS71-int	LTR	ERV1	4977	7668	-1310	1
988	2485	173	116	8	chr18	52859280	52859810	-27513475	-	LTR49	LTR	ERV1	0	595	1	1
1001	7286	94	7	0	chr18	54605040	54606027	-25767258	-	HERVK22-int	LTR	ERVK	-3597	3240	2247	1
1011	2963	186	66	35	chr18	55959422	55960184	-24413101	-	LTR48	LTR	ERV1	0	787	1	1
1128	3818	189	44	21	chr18	71238843	71239617	-9133668	+	MER54B	LTR	ERVL	1	793	0	1
1129	4509	159	28	15	chr18	71305505	71306373	-9066912	-	MER4D1	LTR	ERV1	-37	863	1	1
1154	1841	242	62	9	chr18	74621266	74621796	-5751489	-	MLT1F1	LTR	ERVL-MaLR	-6	563	4	1
636	1244	258	164	21	chr19	6711227	6711652	-51905964	+	MLT1D	LTR	ERVL-MaLR	20	505	0	1
673	5939	223	95	103	chr19	11623840	11624930	-46992686	-	HERVK3-int	LTR	ERVK	-4836	2366	1339	1
738	4144	87	43	44	chr19	20066217	20066682	-38550934	+	LTR66	LTR	ERVL	146	610	0	1
767	8446	127	22	2	chr19	23884957	23886219	-34731397	-	HERVK22-int	LTR	ERVK	-3224	3613	2326	1
801	1753	180	34	75	chr19	28393967	28394485	-30223131	+	LTR49	LTR	ERV1	7	725	-62	1
618	831	208	42	88	chr20	4416605	4416789	-60027378	-	MLT1E2	LTR	ERVL-MaLR	-353	274	105	2
644	536	322	43	49	chr20	7804457	7804764	-56639403	+	MLT1J	LTR	ERVL-MaLR	2	306	-206	2
725	3013	214	54	2	chr20	18364581	18365193	-46078974	-	MLT1E	LTR	ERVL-MaLR	-7	646	1	2
751	3168	206	16	10	chr20	21842124	21842740	-42601427	-	MLT1E3	LTR	ERVL-MaLR	-4	620	1	2
769	4576	181	26	22	chr20	24130126	24130982	-40313185	-	MER4D	LTR	ERV1	-8	895	36	2
769	4576	181	26	22	chr20	24130126	24130982	-40313185	-	MER4D	LTR	ERV1	-8	895	36	2
812	5203	301	36	12	chr20	29802493	29802584	-34641583	-	PRIMA41-int	LTR	ERV1	-3240	4516	4428	2
877	1888	164	49	49	chr20	38399411	38399551	-26044616	+	MLT1B	LTR	ERVL-MaLR	1	141	-249	2
913	4118	177	36	108	chr20	43058892	43059697	-21384470	-	MLT1A0-int	LTR	ERVL-MaLR	-839	896	130	2
939	573	236	84	11	chr20	46529920	46530108	-17914059	+	MLT1F	LTR	ERVL-MaLR	342	544	-4	2
967	1521	184	0	43	chr20	50171148	50171260	-14272907	+	MLT1B	LTR	ERVL-MaLR	1	111	-279	2
970	804	294	82	89	chr20	50499467	50499691	-13944476	-	MLT1J	LTR	ERVL-MaLR	-288	224	13	2
991	573	294	158	11	chr20	53314921	53315153	-11129014	-	MLT1H1	LTR	ERVL-MaLR	-300	279	16	2
684	19280	121	5	2	chr21	13054700	13058061	-33651922	+	HERVIP10F-int	LTR	ERV1	1828	5102	-2635	2
709	1124	224	96	29	chr21	16350220	16350560	-30359423	-	MLT1A0	LTR	ERVL-MaLR	0	365	1	2
719	2378	123	70	248	chr21	17682334	17683069	-29026914	-	LTR49	LTR	ERV1	0	595	1	2
896	2235	170	47	5	chr21	40802494	40802902	-5907081	+	MSTC	LTR	ERVL-MaLR	3	428	0	2
678	3808	206	57	88	chr22	12192313	12192727	-38625741	-	LTR49-int	LTR	ERV1	-1791	4540	4283	2
701	22668	132	5	2	chr22	15284875	15288198	-35530270	+	HERVIP10F-int	LTR	ERV1	1771	5102	-2635	2
708	24371	184	31	23	chr22	16148685	16152001	-34666467	+	HERVI-int	LTR	ERV1	1942	5210	-2575	2
90	560	281	31	120	chr22	17956848	17957172	-32861296	+	MLT1J	LTR	ERVL-MaLR	44	337	-175	2
757	801	331	38	28	chr22	22655117	22655584	-28162884	-	ERV3-16A3_I-int	LTR	ERVL	-2295	2701	2129	2
794	1928	226	52	12	chr22	27450739	27451224	-23367244	+	MLT1D	LTR	ERVL-MaLR	1	505	0	2
816	4030	65	14	2	chr22	30353336	30353831	-20464637	+	LTR2C	LTR	ERV1	1	501	0	2
917	1501	255	91	43	chr22	43529412	43529895	-7288573	+	MLT1J	LTR	ERVL-MaLR	1	508	-4	2
971	3385	145	40	5	chr22	50629173	50629747	-188721	+	LTR49	LTR	ERV1	1	595	0	2
971	3415	134	50	22	chr22	50639809	50640345	-178123	+	LTR49	LTR	ERV1	40	595	0	2
612	1313	134	56	0	chrX	3643169	3643370	-152397525	+	LTR36	LTR	ERV1	399	611	0	4
634	1824	269	15	37	chrX	6447966	6448422	-149592473	-	MLT1E2	LTR	ERVL-MaLR	-98	529	78	4
638	2079	158	10	45	chrX	7029243	7029361	-149011534	-	MLT1B	LTR	ERVL-MaLR	-285	105	1	4
640	2891	132	109	54	chrX	7321984	7322406	-148718489	-	LTR49	LTR	ERV1	0	595	139	4
641	1154	224	119	186	chrX	7400233	7400258	-148640637	-	MLT1E	LTR	ERVL-MaLR	-388	265	250	4
647	642	227	55	52	chrX	8225266	8225536	-147815359	+	MamRep1151	LTR?	LTR?	431	701	-8	4
663	2251	200	115	4	chrX	10321602	10322104	-145718791	-	MLT1F1	LTR	ERVL-MaLR	-4	565	1	4
683	2808	109	102	8	chrX	12951654	12952144	-143088751	+	LTR49	LTR	ERV1	1	736	-51	4
687	3732	107	59	28	chrX	13383048	13383624	-142657271	-	LTR49	LTR	ERV1	0	595	1	4
706	2306	164	100	76	chrX	15909574	15910140	-140130755	+	LTR49	LTR	ERV1	1	581	-14	4
730	3163	146	47	45	chrX	19120839	19121433	-136919462	+	LTR49	LTR	ERV1	1	595	0	4
740	1986	181	3	65	chrX	20369367	20369484	-135671411	-	MLT1B	LTR	ERVL-MaLR	-274	116	3	4
740	1986	181	3	65	chrX	20369367	20369484	-135671411	-	MLT1B	LTR	ERVL-MaLR	-274	116	3	4
762	6370	129	92	69	chrX	23234464	23235657	-132805238	+	MER4-int	LTR	ERV1	2	1268	-5330	4
782	46332	104	18	5	chrX	25893609	25896029	-130144866	+	HERVK22-int	LTR	ERVK	3	2495	-4342	4
794	4346	158	11	21	chrX	27440693	27441899	-128598996	-	MER61-int	LTR	ERV1	-391	4826	4330	4
794	4346	158	11	21	chrX	27440693	27441899	-128598996	-	MER61-int	LTR	ERV1	-391	4826	4330	4
812	235	301	114	0	chrX	29772838	29772931	-126267964	+	MamGypsy2-LTR	LTR	Gypsy	10	114	-69	4
829	1398	207	85	32	chrX	32020397	32020742	-124020153	+	MLT1B	LTR	ERVL-MaLR	1	365	-25	4
956	3055	182	16	95	chrX	48656297	48656950	-107383945	-	MLT1A0-int	LTR	ERVL-MaLR	-632	739	131	4
956	3055	182	16	95	chrX	48656297	48656950	-107383945	-	MLT1A0-int	LTR	ERVL-MaLR	-632	739	131	4
979	4300	141	86	52	chrX	51771421	51771681	-104269214	+	MER4B-int	LTR	ERV1	1346	1600	-4998	4
984	4571	114	23	8	chrX	52352401	52353044	-103687851	+	MER39B	LTR	ERV1	1	653	0	4
984	4571	114	23	8	chrX	52352401	52353044	-103687851	+	MER39B	LTR	ERV1	1	653	0	4
989	2383	162	99	98	chrX	53014787	53015025	-103025870	-	LTR49	LTR	ERV1	-371	224	1	4
1208	1719	265	42	29	chrX	81659338	81659883	-74381012	-	MLT1E1A	LTR	ERVL-MaLR	-1	679	128	4
1267	2650	153	90	42	chrX	89515314	89515893	-66525002	+	LTR66	LTR	ERVL	1	610	0	4
1267	2650	153	90	42	chrX	89515314	89515893	-66525002	+	LTR66	LTR	ERVL	1	610	0	4
1272	2914	117	14	74	chrX	90054347	90054715	-65986180	+	L1PA11	LINE	L1	5681	6051	-123	4
1305	5030	153	16	9	chrX	94435191	94436085	-61604810	-	MER4D1	LTR	ERV1	0	900	1	4
1305	3460	152	10	7	chrX	94455716	94456307	-61584588	-	LTR49	LTR	ERV1	0	595	3	4
1314	4147	223	41	49	chrX	95611372	95612626	-60428269	-	LTR49-int	LTR	ERV1	-3059	3272	1943	4
1334	2793	158	47	29	chrX	98294101	98294681	-57746214	-	LTR49	LTR	ERV1	-4	591	1	4
1461	3848	108	19	25	chrX	114927006	114927515	-41113380	-	LTR49	LTR	ERV1	0	595	88	4
1475	25396	112	32	17	chrX	116664148	116667827	-39373068	-	MER61-int	LTR	ERV1	-646	4571	1	4
1475	25396	112	32	17	chrX	116664148	116667827	-39373068	-	MER61-int	LTR	ERV1	-646	4571	1	4
1486	413	204	58	50	chrX	118201372	118201491	-37839404	+	LTR104_Mam	LTR	Gypsy	67	186	-1323	4
1660	2828	147	38	18	chrX	140906995	140907542	-15133353	+	LTR49	LTR	ERV1	1	558	-37	4
1667	28128	105	13	21	chrX	141935267	141939406	-14101489	+	MER61-int	LTR	ERV1	390	4497	-720	4
1696	2053	178	105	72	chrX	145715467	145716035	-10324860	+	MER61-int	LTR	ERV1	189	777	-4440	4
1708	2937	89	2	32	chrX	147269816	147270258	-8770637	+	HERVK22-int	LTR	ERVK	2328	2756	-4081	4
1726	41336	65	1	3	chrX	149676062	149681132	-6359763	-	HERVK22-int	LTR	ERVK	0	6837	1776	4
1727	48035	65	2	2	chrX	149720386	149727208	-6313687	+	HERVK22-int	LTR	ERVK	1	6837	0	4
1752	1543	144	35	88	chrX	153022227	153022614	-3018281	+	MER31-int	LTR	ERV1	994	1359	-3577	4
1755	2840	130	26	0	chrX	153426668	153427083	-2613812	+	MSTA	LTR	ERVL-MaLR	3	428	0	4
609	2672	153	90	42	chrY	3171199	3171778	-54055637	+	LTR66	LTR	ERVL	1	610	0	4
609	2672	153	90	42	chrY	3171199	3171778	-54055637	+	LTR66	LTR	ERVL	1	610	0	4
688	17055	150	42	22	chrY	13608762	13609668	-43617747	+	HERVK22-int	LTR	ERVK	2248	3572	-3265	4
698	29355	132	14	4	chrY	14869028	14873496	-42353919	-	HERVK22-int	LTR	ERVK	0	6837	2325	4
708	20643	213	35	6	chrY	16197991	16204088	-41023327	+	HERVS71-int	LTR	ERV1	4	7850	-1128	4
88	21949	213	37	6	chrY	16381254	16387351	-40840064	-	HERVS71-int	LTR	ERV1	-1128	7850	4	4
737	14735	119	24	6	chrY	19961095	19961939	-37265476	+	HERVK22-int	LTR	ERVK	2325	3189	-3648	4
741	14683	271	28	27	chrY	20553454	20558492	-36668923	-	HUERS-P3-int	LTR	ERV1	-2982	5937	868	4
1013	505	281	105	77	chr1	56141203	56141487	-192814935	-	MLT1H	LTR	ERVL-MaLR	-177	402	105	1
1123	1365	210	109	22	chr1	70638321	70638682	-178317740	+	MSTD	LTR	ERVL-MaLR	1	396	0	1
1145	4626	127	84	5	chr1	73526633	73527404	-175429018	+	LTR1A2	LTR	ERV1	1	837	0	1
1168	849	264	67	29	chr1	76463728	76464044	-172492378	+	LTR33	LTR	ERVL	5	333	-182	1
1197	22737	104	6	19	chr1	80335708	80338222	-168618200	+	L1PA7	LINE	L1	3692	6148	-6	1
1406	1608	247	97	69	chr1	107674708	107675216	-141281206	+	MLT1F2	LTR	ERVL-MaLR	26	549	-11	1
1484	232	235	0	0	chr1	117836123	117836174	-131120248	+	LTR33A_	LTR	ERVL	72	122	-409	2
1699	4190	92	18	7	chr1	146047815	146048414	-102908008	+	MER4B	LTR	ERV1	5	610	0	2
2079	6675	232	46	22	chr1	195892771	195894266	-53062156	-	MER76-int	LTR	ERVL	-1517	4672	3140	2
2101	17296	154	24	16	chr1	198827948	198830784	-50125638	-	HUERS-P2-int	LTR	ERV1	0	3088	230	2
2147	1078	341	55	33	chr1	204753217	204753973	-44202449	+	ERVL-E-int	LTR	ERVL	412	1260	-4394	3
2190	602	353	53	57	chr1	210439657	210440197	-38516225	-	ERVL-B4-int	LTR	ERVL	-4883	784	247	3
2307	6052	246	128	60	chr1	225720632	225722159	-23234263	+	ERV3-16A3_I-int	LTR	ERVL	2450	4287	-1427	3
2307	936	247	56	5	chr1	225722132	225722353	-23234069	+	ERV3-16A3_I-int	LTR	ERVL	4120	4352	-874	3
2307	6052	246	128	60	chr1	225720632	225722159	-23234263	+	ERV3-16A3_I-int	LTR	ERVL	2450	4287	-1427	3
2307	936	247	56	5	chr1	225722132	225722353	-23234069	+	ERV3-16A3_I-int	LTR	ERVL	4120	4352	-874	3
2311	2709	195	32	2	chr1	226268462	226269001	-22687421	+	MER68	LTR	ERVL	8	563	0	3
2321	1024	240	108	11	chr1	227568541	227568899	-21387523	+	MER21C	LTR	ERVL	506	902	-36	3
2406	11693	168	88	74	chr1	238747533	238748141	-10208281	+	MER52-int	LTR	ERV1	1445	2084	-5007	3
2410	1568	229	50	67	chr1	239273335	239273738	-9682684	+	MSTD	LTR	ERVL-MaLR	1	396	0	3
2410	1568	229	50	67	chr1	239273335	239273738	-9682684	+	MSTD	LTR	ERVL-MaLR	1	396	0	3
2446	2478	304	43	50	chr1	244003743	244004768	-4951654	+	ERV3-16A3_I-int	LTR	ERVL	220	1237	-3759	3
932	269	343	121	71	chr2	45538048	45538735	-196654794	+	LTR78	LTR	ERV1	566	1291	-13	1
948	2020	182	116	17	chr2	47593071	47593530	-194599999	+	LTR54	LTR	ERV1	1	510	0	1
1029	399	318	61	38	chr2	58207008	58207217	-183986312	+	MLT1J	LTR	ERVL-MaLR	56	269	-243	1
1147	521	179	43	9	chr2	73705902	73706015	-168487514	-	MER49	LTR	ERV1	-634	289	173	2
1180	3141	145	37	137	chr2	78029527	78030280	-164163249	-	LTR76	LTR	ERV1	0	675	1	2
1180	21761	181	22	6	chr2	78106056	78112068	-164081461	-	HERVL18-int	LTR	ERVL	0	6047	10	2
1207	1951	250	68	30	chr2	81631068	81631604	-160561925	-	MER68B	LTR	ERVL	-6	558	1	2
1211	1417	333	82	92	chr2	82108003	82109245	-160084284	+	MER110-int	LTR	ERV1	1652	2892	-1755	2
1261	4163	164	22	11	chr2	88686008	88686725	-153506804	+	MER50	LTR	ERV1	1	725	-9	2
1265	3367	184	51	16	chr2	89211244	89211928	-152981601	+	LTR62	LTR	ERVL	1	709	0	2
1271	3279	190	51	16	chr2	89970839	89971523	-152222006	-	LTR62	LTR	ERVL	0	709	1	2
1392	2195	152	16	59	chr2	105878259	105878665	-136314864	+	MLT1B	LTR	ERVL-MaLR	1	388	-2	2
1401	1052	266	125	5	chr2	107021457	107021843	-135171686	-	MLT1J1	LTR	ERVL-MaLR	-2	442	4	2
1421	1043	306	72	76	chr2	109653939	109654480	-132539049	-	ERVL-E-int	LTR	ERVL	-4846	821	283	2
1481	1456	302	74	35	chr2	117443252	117443913	-124749616	-	MLT1I-int	LTR	ERVL-MaLR	-2	1385	697	2
1483	1740	243	47	45	chr2	117709151	117709660	-124483869	+	MER74A	LTR	ERVL	5	514	-44	2
1505	1684	218	22	29	chr2	120651584	120651958	-121541571	+	MLT1A	LTR	ERVL-MaLR	4	374	0	2
1508	2014	277	126	91	chr2	120994141	120995477	-121198052	-	MLT1H-int	LTR	ERVL-MaLR	-19	1390	1	2
1508	2014	277	126	91	chr2	120994141	120995477	-121198052	-	MLT1H-int	LTR	ERVL-MaLR	-19	1390	1	2
1582	1618	204	57	61	chr2	130734480	130734904	-111458625	+	MLT1D	LTR	ERVL-MaLR	84	505	0	2
1594	1168	207	101	13	chr2	132368139	132368447	-109825082	+	LTR51	LTR	ERV1	235	572	-99	2
1907	17796	235	88	87	chr2	173296176	173300177	-68893352	-	LTR25-int	LTR	ERV1	-3106	4082	5	2
1972	876	296	113	8	chr2	181829122	181829487	-60364042	-	LTR16	LTR	ERVL	-30	408	1	2
1978	1227	231	114	14	chr2	182619738	182620093	-59573436	-	MSTD	LTR	ERVL-MaLR	-1	395	1	2
2047	1492	214	73	3	chr2	191663151	191663483	-50530046	+	MER68	LTR	ERVL	1	357	-206	2
2105	19223	95	15	13	chr2	199247353	199250333	-42943196	+	HERVH-int	LTR	ERV1	1	2987	-4726	2
2144	6398	72	39	19	chr2	204383517	204384332	-37809197	-	L1PA10	LINE	L1	-3745	2586	1737	2
2196	13701	142	19	36	chr2	211262181	211264899	-30928630	+	HERVH-int	LTR	ERV1	1	2995	-4718	2
2254	951	289	121	16	chr2	218851376	218851739	-23341790	+	ERV3-16A3_LTR	LTR	ERVL	10	415	-7	2
2365	1017	264	23	10	chr2	233356905	233357200	-8836329	-	LTR33A_	LTR	ERVL	-1	530	232	2
2406	1247	221	83	48	chr2	238810737	238811178	-3382351	-	MLT1C	LTR	ERVL-MaLR	0	467	10	2
804	10263	128	37	19	chr3	28808990	28810577	-169484982	-	HUERS-P2-int	LTR	ERV1	0	3088	1474	2
862	2697	299	60	27	chr3	36342620	36343808	-161951751	-	MER83A-int	LTR	ERV1	-3903	1051	12	2
862	2697	299	60	27	chr3	36342620	36343808	-161951751	-	MER83A-int	LTR	ERV1	-3903	1051	12	2
1050	1040	261	78	82	chr3	61072178	61072678	-137222881	+	MLT1L	LTR	ERVL-MaLR	13	510	-100	2
1141	755	254	142	30	chr3	72927871	72928139	-125367420	-	MLT1K	LTR	ERVL-MaLR	-2	593	291	2
1322	12768	163	72	16	chr3	96700406	96702825	-101592734	+	HUERS-P2-int	LTR	ERV1	1	2556	-532	2
1325	2751	142	63	11	chr3	97106442	97106892	-101188667	+	LTR1	LTR	ERV1	309	783	0	2
1355	6346	137	23	7	chr3	101036421	101037429	-97258130	+	ERVL-int	LTR	ERVL	4543	5567	-190	2
1372	8860	205	76	32	chr3	103182295	103185541	-95110018	-	L1M4c	LINE	L1	-2972	3410	4	2
1379	16127	124	21	7	chr3	104117836	104118687	-94176872	+	L1PA11	LINE	L1	5307	6172	-2	2
1387	11191	100	16	13	chr3	105148190	105148496	-93147063	-	THE1A-int	LTR	ERVL-MaLR	0	1580	1286	2
1415	1256	285	46	85	chr3	108818215	108818733	-89476826	+	LTR33	LTR	ERVL	18	514	-1	2
1428	626	273	67	35	chr3	110577120	110577378	-87718181	+	LTR16E2	LTR	ERVL	300	566	-2	2
1533	542	236	69	84	chr3	124284736	124284986	-74010573	-	MLT1L	LTR	ERVL-MaLR	-1	609	364	2
1556	7622	134	63	25	chr3	127275184	127277040	-71018519	+	MER52-int	LTR	ERV1	2	1929	-5162	2
1574	5754	78	15	1	chr3	129695798	129696568	-68598991	+	MER4E1	LTR	ERV1	1	781	0	2
1574	5754	78	15	1	chr3	129695798	129696568	-68598991	+	MER4E1	LTR	ERV1	1	781	0	2
1574	5754	78	15	1	chr3	129695798	129696568	-68598991	+	MER4E1	LTR	ERV1	1	781	0	2
215	29917	155	25	13	chr3	149288638	149294589	-49000970	+	MER52-int	LTR	ERV1	365	6603	-488	2
215	29917	155	25	13	chr3	149288638	149294589	-49000970	+	MER52-int	LTR	ERV1	365	6603	-488	2
1730	1820	204	46	2	chr3	150143058	150143476	-48152083	+	MER110	LTR	ERV1	48	484	-7	2
1751	1805	224	58	57	chr3	152921981	152922477	-45373082	-	MLT1D	LTR	ERVL-MaLR	-2	503	7	2
1838	22968	106	16	19	chr3	164338113	164339466	-33956093	-	HERVS71-int	LTR	ERV1	-5743	3235	1858	2
2037	1957	319	73	44	chr3	190364955	190366057	-7929502	-	ERV3-16A3_I-int	LTR	ERVL	-3550	1676	540	2
2037	1957	319	73	44	chr3	190364955	190366057	-7929502	-	ERV3-16A3_I-int	LTR	ERVL	-3550	1676	540	2
700	335	278	22	11	chr4	15100013	15100104	-175114451	-	LTR33	LTR	ERVL	-235	280	189	2
720	2073	132	0	7	chr4	17739555	17739851	-172474704	-	AluSx1	SINE	Alu	-14	298	5	2
791	1606	247	28	13	chr4	27099854	27100314	-163114241	-	MLT1C	LTR	ERVL-MaLR	0	467	1	2
919	16730	159	36	18	chr4	43903924	43906748	-146307807	+	HUERS-P2-int	LTR	ERV1	210	3085	-3	2
939	1450	186	27	3	chr4	46491001	46491287	-143723268	+	MER49	LTR	ERV1	1	293	-630	2
941	5381	241	55	13	chr4	46729771	46731049	-143483506	+	ERVL-E-int	LTR	ERVL	3536	4870	-797	2
1137	3124	180	18	0	chr4	72388693	72389244	-117825311	-	MER68	LTR	ERVL	-2	561	1	2
1282	1206	229	44	31	chr4	91456016	91456376	-98758179	-	MLT1A0	LTR	ERVL-MaLR	0	365	1	2
1394	446	323	45	20	chr4	106134652	106134848	-84079707	+	LTR78B	LTR	ERV1	296	496	-800	2
1418	14004	145	21	4	chr4	109250842	109253030	-80961525	-	ERVL-B4-int	LTR	ERVL	0	5714	3489	2
1439	335	262	110	33	chr4	112013219	112013369	-78201186	+	ERVL-B4-int	LTR	ERVL	4573	4735	-979	2
1582	4437	158	8	51	chr4	130782719	130783548	-59431007	+	LTR1A2	LTR	ERV1	45	837	0	2
792	1206	247	107	43	chr21	27150050	27150512	-19559471	-	MLT1D	LTR	ERVL-MaLR	-7	498	4	2
816	4697	138	18	49	chr21	30343899	30344719	-16365264	-	LTR1A2	LTR	ERV1	0	837	44	2
826	1987	193	95	20	chr21	31715016	31715471	-14994512	-	MLT1D	LTR	ERVL-MaLR	0	505	13	2
856	1636	215	67	94	chr21	35629423	35629942	-11080041	-	MLT1D	LTR	ERVL-MaLR	-1	504	1	2
882	565	292	93	67	chr21	38963590	38963874	-7746109	+	LTR67B	LTR	ERVL	78	370	-250	2
924	15851	110	24	5	chr21	44487935	44490230	-2219753	+	HUERS-P2-int	LTR	ERV1	749	3088	0	2
950	1595	312	42	29	chr22	47859717	47860374	-2958094	-	ERVL-E-int	LTR	ERVL	-3338	2329	1664	2
964	720	224	118	33	chr22	49725346	49725618	-1092850	+	LTR52	LTR	ERVL	120	417	-4	2
611	251	263	60	77	chrX	3496502	3496671	-152544224	+	MLT1J1	LTR	ERVL-MaLR	236	403	-45	4
637	1245	209	39	18	chrX	6823213	6823539	-149217356	+	LTR49	LTR	ERV1	1	333	-262	4
649	1189	272	93	46	chrX	8494825	8495345	-147545550	-	MLT1F2	LTR	ERVL-MaLR	-5	555	9	4
729	643	267	62	27	chrX	18882227	18882489	-137158406	+	MLT1L	LTR	ERVL-MaLR	3	274	-336	4
812	2246	219	57	10	chrX	29857603	29858119	-126182776	-	MER34	LTR	ERV1	0	542	1	4
848	1365	166	186	49	chrX	34532315	34532664	-121508231	+	MLT1A1	LTR	ERVL-MaLR	1	408	0	4
851	2004	135	45	59	chrX	34868207	34868594	-121172301	-	THE1D	LTR	ERVL-MaLR	0	381	1	4
913	4261	136	4	163	chrX	43085404	43086336	-112954559	-	LTR1	LTR	ERV1	0	783	1	4
976	706	228	51	0	chrX	51323007	51323156	-104717739	+	MLT1E1	LTR	ERVL-MaLR	498	654	0	4
1152	14153	177	65	23	chrX	74366397	74369045	-81671850	-	ERVL-B4-int	LTR	ERVL	-2398	3316	535	4
1232	7555	106	7	0	chrX	84883350	84884395	-71156500	+	THE1-int	LTR	ERVL-MaLR	172	1223	-357	4
1269	4208	148	34	43	chrX	89767668	89768475	-66272420	+	LTR1A1	LTR	ERV1	1	799	0	4
1295	6639	169	74	3	chrX	93176451	93177804	-62863091	+	MER52-int	LTR	ERV1	1757	3206	-3885	4
1313	13851	116	35	24	chrX	95533952	95536336	-60504559	-	MER57A-int	LTR	ERV1	-2432	3755	1344	4
1314	6527	256	40	45	chrX	95551740	95552505	-60488390	-	ERVL-B4-int	LTR	ERVL	-4918	796	1	4
1351	1882	229	7	28	chrX	100428188	100428611	-55612284	-	MLT1C	LTR	ERVL-MaLR	0	467	54	4
1424	753	277	161	42	chrX	110045528	110046006	-45994889	+	MLT1M	LTR	ERVL-MaLR	97	642	-30	4
1555	2654	199	45	29	chrX	127174253	127175072	-28865823	-	LTR27B	LTR	ERV1	0	1020	1	4
1562	1450	325	58	21	chrX	128166407	128167073	-27873822	+	ERV3-16A3_I-int	LTR	ERVL	137	828	-4168	4
1633	1302	241	4	15	chrX	137469572	137469841	-18571054	-	ERVL-B4-int	LTR	ERVL	-5178	536	271	4
1660	494	221	88	19	chrX	140945508	140945720	-15095175	-	MamRep1151	LTR?	LTR?	-2	707	480	4
611	4321	149	34	43	chrY	3415527	3416334	-53811081	+	LTR1A1	LTR	ERV1	1	799	0	4
642	265	262	66	80	chrY	7484681	7484880	-49742535	-	MLT1J1	LTR	ERVL-MaLR	-13	431	236	4
683	7889	176	81	14	chrY	12923114	12925804	-44301611	-	HUERS-P2-int	LTR	ERV1	0	3088	213	4
691	1044	279	95	50	chrY	13942753	13943274	-43284141	+	MLT1F2	LTR	ERVL-MaLR	9	555	-5	4
708	28741	75	18	1	chrY	16165735	16172409	-41055006	-	HERV30-int	LTR	ERV1	-1462	6795	1	4
710	32566	97	12	2	chrY	16412938	16419610	-40807805	+	HERV30-int	LTR	ERV1	1	6795	-1462	4
731	8065	174	42	3	chrY	19233119	19234598	-37992817	+	HUERS-P2-int	LTR	ERV1	1549	3088	0	4
596	281	263	170	7	chr1	1464274	1464412	-247492010	-	MLT1A0	LTR	ERVL-MaLR	-73	292	128	1
599	1246	211	142	27	chr1	1875824	1876228	-247080194	+	MLT1C	LTR	ERVL-MaLR	8	465	-2	2
621	1126	251	54	40	chr1	4745989	4746442	-244209980	-	MLT1C	LTR	ERVL-MaLR	-1	466	7	5
662	1570	238	64	28	chr1	10199151	10199326	-238757096	-	MLT1D	LTR	ERVL-MaLR	-305	200	24	1
691	1226	239	123	71	chr1	13974359	13974836	-234981586	+	MLT1D	LTR	ERVL-MaLR	1	505	0	2
691	1226	239	123	71	chr1	13974359	13974836	-234981586	+	MLT1D	LTR	ERVL-MaLR	1	505	0	2
710	632	193	41	48	chr1	16463917	16464064	-232492358	-	MLT1A0	LTR	ERVL-MaLR	-209	156	11	2
717	1406	233	115	46	chr1	17366877	17367336	-231589086	-	MLT1D	LTR	ERVL-MaLR	-6	499	5	2
717	1406	233	115	46	chr1	17366877	17367336	-231589086	-	MLT1D	LTR	ERVL-MaLR	-6	499	5	2
724	799	196	38	6	chr1	18341261	18341441	-230614981	-	MLT1C	LTR	ERVL-MaLR	-281	186	1	3
760	1643	182	55	48	chr1	23008286	23008510	-225947912	+	MLT1A1	LTR	ERVL-MaLR	152	379	-29	4
813	1901	177	125	78	chr1	30003957	30004434	-218951988	+	MLT1D	LTR	ERVL-MaLR	1	503	-2	5
839	1592	222	60	73	chr1	33419908	33420087	-215536335	-	MLT1D	LTR	ERVL-MaLR	-315	190	3	6
857	596	255	33	80	chr1	35771537	35771763	-213184659	+	LTR33	LTR	ERVL	1	215	-300	6
864	1649	222	45	29	chr1	36662276	36662677	-212293745	-	MLT1C	LTR	ERVL-MaLR	-62	405	7	7
874	1683	162	36	154	chr1	37892718	37893063	-211063359	+	MLT1A0	LTR	ERVL-MaLR	1	305	-60	7
876	1696	207	82	16	chr1	38228125	38228548	-210727874	+	MLT1D	LTR	ERVL-MaLR	47	499	-6	7
877	1442	193	112	29	chr1	38339526	38339868	-210616554	+	MLT1A	LTR	ERVL-MaLR	1	374	0	7
878	1752	192	87	19	chr1	38517888	38518318	-210438104	-	MLT1C	LTR	ERVL-MaLR	0	467	6	7
994	320	284	12	0	chr1	53717472	53717553	-195238869	+	MLT1N2	LTR	ERVL-MaLR	1	82	-480	1
1002	1168	241	107	25	chr1	54689040	54689444	-194266978	+	MLT1C	LTR	ERVL-MaLR	1	441	-26	1
1013	1890	172	18	75	chr1	56183830	56184244	-192772178	+	MLT1B	LTR	ERVL-MaLR	1	390	0	1
1019	1931	163	48	19	chr1	56922472	56922835	-192033587	+	MLT1A	LTR	ERVL-MaLR	1	374	0	1
1083	865	231	52	116	chr1	65293097	65293493	-183662929	-	MLT1B	LTR	ERVL-MaLR	-6	384	16	1
1083	865	231	52	116	chr1	65293097	65293493	-183662929	-	MLT1B	LTR	ERVL-MaLR	-6	384	16	1
1130	3495	89	0	4	chr1	71502067	71502528	-177453894	+	LTR71A	LTR	ERV1	1	459	0	1
1153	1154	235	55	42	chr1	74492799	74493154	-174463268	-	MLT1A	LTR	ERVL-MaLR	-14	360	1	1
1155	1285	228	75	9	chr1	74821729	74822070	-174134352	-	MLT1A0	LTR	ERVL-MaLR	0	365	1	1
1194	1168	265	35	78	chr1	79856516	79857003	-169099419	-	MLT1C	LTR	ERVL-MaLR	-2	465	1	1
1212	1291	225	54	87	chr1	82300832	82301236	-166655186	-	MLT1B	LTR	ERVL-MaLR	0	390	1	1
1264	3153	109	22	0	chr1	89078954	89079403	-159877019	-	LTR71A	LTR	ERV1	0	459	1	1
1273	2074	178	8	13	chr1	90228090	90228482	-158727940	-	MLT1B	LTR	ERVL-MaLR	0	390	1	1
1297	1376	163	25	52	chr1	93395664	93395994	-155560428	-	LTR49-int	LTR	ERV1	-3209	3122	2802	1
1311	2083	183	78	15	chr1	95207507	95207974	-153748448	+	MLT1D	LTR	ERVL-MaLR	2	500	-5	1
1314	968	290	23	39	chr1	95666722	95667034	-153289388	+	LTR16	LTR	ERVL	121	427	-11	1
1321	1828	219	32	45	chr1	96471974	96472481	-152483941	-	LTR54	LTR	ERV1	-10	500	1	1
1321	1828	219	32	45	chr1	96471974	96472481	-152483941	-	LTR54	LTR	ERV1	-10	500	1	1
1359	2464	213	17	22	chr1	101545644	101546191	-147410231	+	MER77	LTR	ERVL	2	579	-25	1
1399	1623	190	54	82	chr1	106698821	106699223	-142257199	+	MLT1B	LTR	ERVL-MaLR	1	390	0	1
1463	2450	259	70	44	chr1	115122731	115122792	-133833630	-	MLT1G3-int	LTR	ERVL-MaLR	-790	699	651	1
1473	393	167	82	0	chr1	116432298	116432388	-132524034	+	MLT1C	LTR	ERVL-MaLR	370	467	0	1
1703	1799	153	77	3	chr1	146623393	146623754	-102332668	+	MLT1B	LTR	ERVL-MaLR	1	390	0	2
1703	1799	153	77	3	chr1	146623393	146623754	-102332668	+	MLT1B	LTR	ERVL-MaLR	1	390	0	2
1821	1590	173	104	32	chr1	162095150	162095496	-86860926	+	MLT1A	LTR	ERVL-MaLR	1	374	0	2
1827	1964	182	13	68	chr1	162855777	162856190	-86100232	+	MLT1B	LTR	ERVL-MaLR	1	390	0	2
1829	1527	236	88	25	chr1	163115760	163116195	-85840227	-	MLT1C	LTR	ERVL-MaLR	-2	465	1	2
1908	2432	188	41	4	chr1	173433762	173434212	-75522210	+	MLT1C	LTR	ERVL-MaLR	1	467	0	2
1910	2102	184	20	80	chr1	173670844	173671333	-75285089	-	LTR71A	LTR	ERV1	0	459	1	2
1910	2102	184	20	80	chr1	173670844	173671333	-75285089	-	LTR71A	LTR	ERV1	0	459	1	2
1962	2117	177	30	51	chr1	180522996	180523466	-68432956	+	MLT1C	LTR	ERVL-MaLR	1	460	-7	2
2070	6330	225	46	23	chr1	194710175	194711722	-54244700	-	MER70-int	LTR	ERVL	-2296	2727	1144	2
2131	1752	137	152	9	chr1	202761520	202761852	-46194570	+	MLT1B	LTR	ERVL-MaLR	3	390	0	2
2151	1827	195	109	44	chr1	205331921	205332355	-43624067	+	MLT1C	LTR	ERVL-MaLR	2	467	0	3
2155	2044	142	131	88	chr1	205818018	205818449	-43137973	-	LTR47A	LTR	ERVL	0	452	1	3
2183	2026	206	30	24	chr1	209542978	209543436	-39412986	+	MLT1C	LTR	ERVL-MaLR	7	467	0	3
2206	1793	175	111	31	chr1	212478010	212478420	-36478002	-	LTR54B	LTR	ERV1	-44	454	2	3
2224	2444	171	49	4	chr1	214849998	214850468	-34105954	+	MLT1D	LTR	ERVL-MaLR	1	492	-13	3
2247	1852	201	40	57	chr1	217905169	217905675	-31050747	+	MLT1D	LTR	ERVL-MaLR	3	499	-6	3
2261	863	182	45	40	chr1	219722315	219722515	-29233907	+	MLT1B	LTR	ERVL-MaLR	1	201	-189	3
2344	2723	163	38	18	chr1	230585088	230585583	-18370839	+	MLT1D	LTR	ERVL-MaLR	1	505	0	3
2358	1577	184	64	81	chr1	232498431	232498927	-16457495	-	MLT1D	LTR	ERVL-MaLR	-16	489	3	3
2360	789	225	56	62	chr1	232747867	232748111	-16208311	-	MLT1D	LTR	ERVL-MaLR	-141	249	20	3
2393	5082	152	22	29	chr1	237009332	237010241	-11946181	+	MER4D	LTR	ERV1	1	903	0	3
2402	1459	209	54	25	chr1	238196677	238197101	-10759321	+	MLT1C	LTR	ERVL-MaLR	12	495	-10	3
2438	1765	188	42	47	chr1	242894075	242894359	-6062063	+	MLT1B	LTR	ERVL-MaLR	110	384	-6	3
615	788	178	30	64	chr2	4014351	4014555	-238178974	-	MLT1A	LTR	ERVL-MaLR	-176	198	2	1
618	1680	235	43	20	chr2	4400788	4401239	-237792290	+	MLT1C	LTR	ERVL-MaLR	6	467	0	1
626	1381	214	24	176	chr2	5470007	5470450	-236723079	+	MLT1A	LTR	ERVL-MaLR	1	374	0	1
626	1381	214	24	176	chr2	5470007	5470450	-236723079	+	MLT1A	LTR	ERVL-MaLR	1	374	0	1
637	32544	209	19	16	chr2	6838363	6846789	-235346740	-	HUERS-P3-int	LTR	ERV1	-224	8695	262	1
643	1628	212	50	9	chr2	7711450	7711798	-234481731	+	MLT1A0	LTR	ERVL-MaLR	1	363	-2	1
659	3384	110	7	0	chr2	9764119	9764575	-232428954	+	LTR71A	LTR	ERV1	1	459	0	1
674	556	181	0	153	chr2	11710135	11710305	-230483224	-	MLT1A0	LTR	ERVL-MaLR	-220	145	2	1
696	665	182	42	77	chr2	14622006	14622202	-227571327	+	MLT1A	LTR	ERVL-MaLR	13	201	-164	1
718	1269	262	102	41	chr2	17458317	17458783	-224734746	+	MLT1D	LTR	ERVL-MaLR	8	505	0	1
727	551	231	75	6	chr2	18615814	18615975	-223577554	+	MLT1B	LTR	ERVL-MaLR	3	175	-215	1
736	1810	293	114	31	chr2	19814421	19815219	-222378310	-	ERVL-E-int	LTR	ERVL	-4081	1586	723	1
744	1672	202	56	101	chr2	20867689	20868045	-221325484	+	MLT1C	LTR	ERVL-MaLR	143	467	0	1
745	1465	161	17	0	chr2	21055496	21055730	-221137799	-	MLT1B	LTR	ERVL-MaLR	-118	272	35	1
790	1283	167	60	23	chr2	26986056	26986381	-215207148	-	MLT1D	LTR	ERVL-MaLR	-112	393	24	1
807	1652	230	63	15	chr2	29205432	29205887	-212987642	-	MLT1D	LTR	ERVL-MaLR	-27	478	1	1
811	1469	231	145	38	chr2	29635224	29635604	-212557925	+	MLT1D	LTR	ERVL-MaLR	1	440	-65	1
818	3497	92	0	11	chr2	30627075	30627539	-211565990	-	LTR71A	LTR	ERV1	0	459	1	1
818	2487	128	85	0	chr2	30666494	30666891	-211526638	+	MER57C2	LTR	ERV1	1	434	0	1
833	1757	220	45	20	chr2	32532204	32532654	-209660875	-	MLT1C	LTR	ERVL-MaLR	-5	462	1	1
840	1150	253	64	21	chr2	33453427	33453754	-208739775	-	MLT1F	LTR	ERVL-MaLR	-206	342	1	1
843	1850	162	37	20	chr2	33830255	33830602	-208362927	+	MLT1A0	LTR	ERVL-MaLR	2	354	-11	1
856	1676	252	38	34	chr2	35537212	35537709	-206655820	+	MLT1D	LTR	ERVL-MaLR	1	499	-6	1
887	2053	137	67	8	chr2	39713383	39713750	-202479779	+	MLT1B	LTR	ERVL-MaLR	1	390	0	1
118	615	283	82	64	chr2	47579131	47579490	-194614039	+	MLT1J	LTR	ERVL-MaLR	8	373	-139	1
954	1739	215	43	51	chr2	48477817	48478287	-193715242	+	MLT1C	LTR	ERVL-MaLR	2	467	0	1
1109	3415	100	0	0	chr2	68698005	68698464	-173495065	-	LTR71A	LTR	ERV1	0	459	1	2
1118	1472	228	157	34	chr2	69889319	69889759	-172303770	-	MLT1D	LTR	ERVL-MaLR	-1	504	1	2
1124	1292	246	44	87	chr2	70750336	70750808	-171442721	+	MLT1C	LTR	ERVL-MaLR	17	467	0	2
1156	1425	186	127	6	chr2	74904840	74905159	-167288370	-	MLT1A0	LTR	ERVL-MaLR	0	365	3	2
1167	1725	227	56	22	chr2	76286525	76286971	-165906558	+	MLT1C	LTR	ERVL-MaLR	6	467	0	2
1170	990	280	35	58	chr2	76742734	76743113	-165450416	+	MLT1A	LTR	ERVL-MaLR	1	370	-4	2
1216	2114	144	52	8	chr2	82755522	82755886	-159437643	-	THE1D	LTR	ERVL-MaLR	0	381	1	2
1239	2006	151	74	20	chr2	85801404	85801749	-156391780	+	MLT1A0	LTR	ERVL-MaLR	1	365	0	2
1243	2048	194	89	55	chr2	86325377	86325864	-155867665	+	MLT1D	LTR	ERVL-MaLR	1	505	0	2
1266	823	257	21	99	chr2	89294217	89294561	-152898968	-	MLT1B	LTR	ERVL-MaLR	-9	448	67	2
1270	828	257	21	99	chr2	89887916	89888260	-152305269	+	MLT1B	LTR	ERVL-MaLR	67	448	-9	2
1312	1857	173	13	49	chr2	95395232	95395620	-146797909	+	MLT1B	LTR	ERVL-MaLR	1	374	-16	2
1333	1813	194	11	6	chr2	98073713	98074076	-144119453	-	MLT1A0	LTR	ERVL-MaLR	0	365	1	2
1344	1572	184	70	35	chr2	99536184	99536555	-142656974	-	MLT1B	LTR	ERVL-MaLR	-2	388	4	2
1344	1572	184	70	35	chr2	99536184	99536555	-142656974	-	MLT1B	LTR	ERVL-MaLR	-2	388	4	2
1359	3096	166	17	29	chr2	101516509	101516977	-140676552	+	LTR26C	LTR	ERV1	77	539	0	2
1359	3096	166	17	29	chr2	101516509	101516977	-140676552	+	LTR26C	LTR	ERV1	77	539	0	2
1370	2036	151	50	0	chr2	102897230	102897594	-139295935	-	MLT1B	LTR	ERVL-MaLR	-7	383	1	2
1461	1054	268	51	29	chr2	114903649	114903991	-127289538	+	MLT1B	LTR	ERVL-MaLR	18	367	-23	2
1477	1302	157	48	4	chr2	116967294	116967531	-125225998	+	MER34A1	LTR	ERV1	1	248	-339	2
1480	1660	232	53	36	chr2	117318066	117318562	-124874967	-	MLT1D	LTR	ERVL-MaLR	0	505	1	2
1536	1267	262	13	35	chr2	124721775	124722170	-117471359	-	MLT1B	LTR	ERVL-MaLR	-4	386	1	2
1566	1143	253	70	35	chr2	128641389	128641761	-113551768	+	MLT1B	LTR	ERVL-MaLR	1	386	-4	2
1571	2618	211	107	19	chr2	129315092	129315721	-112877808	-	MER76	LTR	ERVL	0	691	1	2
1612	2680	174	33	4	chr2	134673464	134673936	-107519593	+	MLT1D	LTR	ERVL-MaLR	20	505	0	2
1640	1111	201	121	57	chr2	138285505	138285924	-103907605	-	MLT1D	LTR	ERVL-MaLR	-35	432	1	2
1670	1318	255	5	39	chr2	142296682	142297065	-99896464	-	MLT1A	LTR	ERVL-MaLR	-4	370	1	2
1707	1934	149	18	149	chr2	147137281	147137731	-95055798	-	MLT1B	LTR	ERVL-MaLR	0	390	1	2
1710	1998	203	81	23	chr2	147518033	147518472	-94675057	-	MLT1C	LTR	ERVL-MaLR	0	467	1	2
1711	1273	220	53	66	chr2	147657357	147657736	-94535793	-	MLT1A	LTR	ERVL-MaLR	0	374	1	2
1711	1273	220	53	66	chr2	147657357	147657736	-94535793	-	MLT1A	LTR	ERVL-MaLR	0	374	1	2
1847	1524	178	77	56	chr2	165483579	165483936	-76709593	-	MLT1A0	LTR	ERVL-MaLR	0	365	1	2
1893	1915	196	69	18	chr2	171464212	171464649	-70728880	-	MLT1C	LTR	ERVL-MaLR	-6	461	1	2
1902	1628	247	75	55	chr2	172702911	172703404	-69490125	+	MLT1D	LTR	ERVL-MaLR	1	504	-1	2
1915	1627	189	34	16	chr2	174433555	174433872	-67759657	+	MLT1A0	LTR	ERVL-MaLR	41	363	-2	2
1918	2007	164	31	16	chr2	174750219	174750598	-67442931	+	MLT1B	LTR	ERVL-MaLR	6	390	0	2
1951	1779	136	70	91	chr2	179140203	179140599	-63052930	+	MLT1B	LTR	ERVL-MaLR	4	390	0	2
1960	525	296	145	25	chr2	180250127	180250453	-61943076	+	LTR33	LTR	ERVL	1	372	-143	2
2027	1092	144	25	49	chr2	189123331	189123535	-53069994	+	MLT1C	LTR	ERVL-MaLR	6	204	-263	2
2046	20801	85	17	33	chr2	191584255	191587357	-50606172	+	HUERS-P1-int	LTR	ERV1	68	3117	-3146	2
2066	3198	125	4	0	chr2	194154757	194155214	-48038315	-	LTR71A	LTR	ERV1	0	459	1	2
2066	3206	112	4	7	chr2	194162717	194163177	-48030352	-	LTR71A	LTR	ERV1	0	459	1	2
2074	901	194	40	40	chr2	195269915	195270141	-46923388	+	MER34	LTR	ERV1	317	542	0	2
2079	946	162	223	144	chr2	195865689	195866043	-46327486	+	MLT1B	LTR	ERVL-MaLR	1	390	0	2
2079	727	284	107	77	chr2	195943247	195943533	-46249996	-	ERVL-E-int	LTR	ERVL	-1090	4667	4346	2
2086	3437	94	4	0	chr2	196831577	196832033	-45361496	-	LTR71A	LTR	ERV1	0	459	2	2
2100	714	255	76	79	chr2	198660731	198661169	-43532360	-	MLT1D	LTR	ERVL-MaLR	0	505	18	2
2179	1103	213	4	16	chr2	208944720	208944963	-33248566	+	MLT1A	LTR	ERVL-MaLR	135	374	0	2
2197	1305	286	57	17	chr2	211370818	211371238	-30822291	+	MER74C	LTR	ERVL	4	441	-19	2
2205	1854	182	3	106	chr2	212350996	212351431	-29842098	+	MLT1B	LTR	ERVL-MaLR	1	390	0	2
2294	1500	222	32	29	chr2	224056608	224056849	-18136680	-	MLT1C	LTR	ERVL-MaLR	-66	401	154	2
2334	2006	211	36	20	chr2	229262604	229263063	-12930466	-	MLT1C	LTR	ERVL-MaLR	0	467	1	2
2339	1374	139	11	142	chr2	229982326	229982524	-12211005	-	MLT1D	LTR	ERVL-MaLR	-229	276	117	2
2400	1096	198	70	90	chr2	237961573	237961950	-4231579	+	MLT1B	LTR	ERVL-MaLR	18	386	-4	2
2405	738	259	166	26	chr2	238570318	238570706	-3622823	+	MLT1C	LTR	ERVL-MaLR	1	453	-52	2
603	3522	81	7	0	chr3	2479330	2479786	-195815773	+	LTR71A	LTR	ERV1	1	459	0	2
611	704	276	58	51	chr3	3422873	3423247	-194872312	-	MLT1H1-int	LTR	ERVL-MaLR	-619	870	494	2
611	1740	225	107	10	chr3	3437746	3438226	-194857333	+	MER34	LTR	ERV1	11	542	0	2
624	3572	89	0	4	chr3	5140822	5141283	-193154276	-	LTR71A	LTR	ERV1	0	459	1	2
628	1785	207	30	20	chr3	5637071	5637466	-192658093	-	MLT1A1	LTR	ERVL-MaLR	-2	406	8	2
648	3204	107	22	0	chr3	8341894	8342343	-189953216	+	LTR71A	LTR	ERV1	1	459	0	2
674	830	137	7	73	chr3	11733364	11733497	-186562062	-	LTR34	LTR	ERV1	-542	157	35	2
696	1851	222	84	23	chr3	14650275	14650746	-183644813	-	MLT1D	LTR	ERVL-MaLR	-3	502	1	2
709	2534	172	58	4	chr3	16334700	16335178	-181960381	+	MLT1D	LTR	ERVL-MaLR	1	505	0	2
750	1596	222	46	11	chr3	21640405	21640765	-176654794	+	MLT1A	LTR	ERVL-MaLR	1	373	-1	2
801	2006	164	39	29	chr3	28431276	28431660	-169863899	-	MLT1B	LTR	ERVL-MaLR	0	390	3	2
820	1919	195	60	33	chr3	30912303	30912785	-167382774	-	MLT1D	LTR	ERVL-MaLR	0	505	10	2
832	227	268	27	0	chr3	32386007	32386078	-165909481	-	MLT1M	LTR	ERVL-MaLR	-454	218	146	2
842	4203	148	129	34	chr3	33708562	33709455	-164586104	-	L1MA9	LINE	L1	-522	5790	4807	2
847	867	287	37	20	chr3	34357945	34358293	-163937266	-	LTR16C	LTR	ERVL	-5	484	131	2
936	3445	92	9	0	chr3	46111060	46111515	-152184044	-	LTR71A	LTR	ERV1	0	459	1	2
945	1578	207	31	28	chr3	47264739	47265097	-151030462	+	MLT1A	LTR	ERVL-MaLR	8	366	-8	2
1027	2136	178	39	24	chr3	57952148	57952604	-140342955	-	MLT1C	LTR	ERVL-MaLR	-4	463	1	2
1041	1111	226	91	52	chr3	59780514	59780860	-138514699	+	MLT1A	LTR	ERVL-MaLR	1	361	-13	2
1041	1381	226	136	12	chr3	59809116	59809520	-138486039	+	MLT1C	LTR	ERVL-MaLR	6	467	0	2
1044	1178	283	119	36	chr3	60280312	60280756	-138014803	+	MLT1D	LTR	ERVL-MaLR	1	486	-19	2
1048	1843	154	71	23	chr3	60784690	60785036	-137510523	+	MLT1A0	LTR	ERVL-MaLR	2	365	0	2
1081	1574	217	135	37	chr3	65073003	65073432	-133222127	+	MLT1D	LTR	ERVL-MaLR	22	505	0	2
1081	1574	217	135	37	chr3	65073003	65073432	-133222127	+	MLT1D	LTR	ERVL-MaLR	22	505	0	2
1125	1475	208	68	48	chr3	70817988	70818310	-127477249	+	MLT1C	LTR	ERVL-MaLR	25	343	-124	2
1139	2121	133	60	48	chr3	72701134	72701512	-125594047	+	MLT1B	LTR	ERVL-MaLR	1	383	-7	2
1151	1663	198	71	3	chr3	74225130	74225470	-124070089	-	MLT1A0	LTR	ERVL-MaLR	0	365	1	2
1206	1245	235	40	43	chr3	81440226	81440599	-116854960	-	MLT1A	LTR	ERVL-MaLR	-2	372	1	2
1326	1521	195	47	31	chr3	97211387	97211746	-101083813	-	MLT1A0	LTR	ERVL-MaLR	0	365	1	2
1326	1521	195	47	31	chr3	97211387	97211746	-101083813	-	MLT1A0	LTR	ERVL-MaLR	0	365	1	2
1368	884	234	126	43	chr3	102632383	102632535	-95663024	-	MLT1C	LTR	ERVL-MaLR	-292	175	6	2
1401	1600	187	58	28	chr3	107006987	107007340	-91288219	-	MLT1A0	LTR	ERVL-MaLR	0	365	2	2
1401	1600	187	58	28	chr3	107006987	107007340	-91288219	-	MLT1A0	LTR	ERVL-MaLR	0	365	2	2
1409	1893	177	104	31	chr3	108023713	108024132	-90271427	+	MLT1D	LTR	ERVL-MaLR	1	453	-52	2
1431	1151	224	92	63	chr3	110934812	110935255	-87360304	-	MLT1C	LTR	ERVL-MaLR	-2	465	9	2
1433	1903	167	36	25	chr3	111190430	111190787	-87104772	-	MLT1A0	LTR	ERVL-MaLR	-4	361	1	2
1460	1497	191	54	34	chr3	114730421	114730801	-83564758	+	MLT1B	LTR	ERVL-MaLR	1	388	-2	2
1507	1564	185	69	14	chr3	120853396	120853574	-77441985	+	MLT1B	LTR	ERVL-MaLR	1	180	-210	2
1510	571	416	25	11	chr3	121260944	121261299	-77034260	+	LTR78B	LTR	ERV1	480	839	-457	2
1518	4693	146	8	51	chr3	122315061	122315883	-75979676	+	LTR1A2	LTR	ERV1	52	837	0	2
1660	1197	267	65	76	chr3	141012443	141012954	-57282605	-	MLT1J	LTR	ERVL-MaLR	0	512	8	2
1677	1891	208	27	10	chr3	143259824	143260228	-55035331	-	MLT1C	LTR	ERVL-MaLR	0	467	57	2
1677	1891	208	27	10	chr3	143259824	143260228	-55035331	-	MLT1C	LTR	ERVL-MaLR	0	467	57	2
1701	3209	105	4	42	chr3	146333467	146333944	-51961615	+	LTR71A	LTR	ERV1	1	459	0	2
1701	3157	121	11	0	chr3	146339362	146339816	-51955743	+	LTR71A	LTR	ERV1	1	459	0	2
1702	872	248	50	34	chr3	146472769	146473007	-51822552	-	MLT1A	LTR	ERVL-MaLR	0	374	133	2
1780	1846	154	166	14	chr3	156710462	156710889	-41584670	+	MLT1D	LTR	ERVL-MaLR	1	505	0	2
1781	1403	206	43	35	chr3	156802801	156803169	-41492390	-	MLT1A	LTR	ERVL-MaLR	0	374	4	2
1796	2169	146	51	11	chr3	158745531	158745905	-39549654	-	MLT1B	LTR	ERVL-MaLR	0	390	1	2
1816	1238	186	168	22	chr3	161478221	161478539	-36817020	-	MLT1A	LTR	ERVL-MaLR	0	374	1	2
1845	305	279	63	55	chr3	165240465	165240519	-33055040	-	MER92D	LTR	ERV1	-525	111	55	2
1869	2893	146	5	5	chr3	168320317	168320765	-29974794	+	MLT1C	LTR	ERVL-MaLR	1	448	-19	2
1880	1520	215	27	83	chr3	169836298	169836694	-28458865	-	MLT1A	LTR	ERVL-MaLR	-1	373	1	2
1889	1227	228	68	109	chr3	170958213	170958701	-27336858	+	MLT1C	LTR	ERVL-MaLR	1	467	0	2
1899	1304	224	37	31	chr3	172277237	172277591	-26017968	-	MLT1A	LTR	ERVL-MaLR	-14	394	1	2
1928	1137	237	83	62	chr3	176060803	176061190	-22234369	-	MSTD	LTR	ERVL-MaLR	0	396	1	2
1933	1710	222	22	3	chr3	176798439	176798795	-21496764	-	MLT1A0	LTR	ERVL-MaLR	0	365	3	2
2009	2714	212	60	25	chr3	186712341	186713022	-11582537	-	MER39	LTR	ERV1	-1	706	1	2
2037	1422	210	66	70	chr3	190346560	190346986	-7948573	-	MLT1C	LTR	ERVL-MaLR	0	467	44	2
2041	1628	197	54	21	chr3	190863997	190864371	-7431188	+	MLT1B	LTR	ERVL-MaLR	3	389	-1	2
2044	6587	126	32	27	chr3	191253895	191255000	-7040559	-	LTR49-int	LTR	ERV1	-1	6330	5221	2
2047	2825	145	52	0	chr3	191738211	191738646	-6556913	-	LTR71A	LTR	ERV1	0	459	1	2
2047	3179	123	11	0	chr3	191743718	191744172	-6551387	-	LTR71A	LTR	ERV1	0	459	1	2
2063	1142	258	35	46	chr3	193836834	193837204	-4458355	-	MLT1A	LTR	ERVL-MaLR	-4	370	5	2
612	2471	101	3	11	chr4	3555114	3555493	-186659062	-	MER41B	LTR	ERV1	-258	376	1	2
620	2296	163	5	3	chr4	4682347	4682734	-185531821	-	MLT1B	LTR	ERVL-MaLR	-2	388	1	2
624	1179	225	54	87	chr4	5238092	5238516	-184976039	-	MLT1C	LTR	ERVL-MaLR	0	467	59	2
627	1642	221	138	44	chr4	5573173	5573723	-184640832	+	MLT1E2	LTR	ERVL-MaLR	18	627	0	2
643	1096	269	73	25	chr4	7636780	7637219	-182577336	-	MLT1C	LTR	ERVL-MaLR	0	467	6	2
647	4678	99	11	23	chr4	8243016	8243522	-181971033	+	MER41B	LTR	ERV1	1	504	-130	2
712	1041	223	53	122	chr4	16731320	16731723	-173482832	+	MLT1A	LTR	ERVL-MaLR	1	374	0	2
715	431	191	11	60	chr4	17116415	17116515	-173098040	+	MLT1A0	LTR	ERVL-MaLR	51	145	-220	2
716	1311	236	52	52	chr4	17185869	17186254	-173028301	-	MLT1B	LTR	ERVL-MaLR	-5	385	1	2
746	1117	238	64	49	chr4	21229940	21230342	-168984213	+	MLT1C	LTR	ERVL-MaLR	1	437	-68	2
769	2427	136	18	50	chr4	24137132	24137416	-166077139	+	MLT1B	LTR	ERVL-MaLR	102	390	0	2
793	2152	178	87	13	chr4	27367279	27367728	-162846827	-	MLT1D	LTR	ERVL-MaLR	0	505	21	2
796	1596	224	36	3	chr4	27762172	27762525	-162452030	-	MLT1A0	LTR	ERVL-MaLR	0	365	1	2
829	1583	202	46	14	chr4	32041048	32041404	-158173151	+	MLT1B	LTR	ERVL-MaLR	3	370	-20	2
836	1643	226	11	34	chr4	32932946	32933327	-157281228	-	MLT1A	LTR	ERVL-MaLR	-2	372	1	2
836	1643	226	11	34	chr4	32932946	32933327	-157281228	-	MLT1A	LTR	ERVL-MaLR	-2	372	1	2
856	4654	135	19	8	chr4	35525259	35526048	-154688507	-	LTR1A1	LTR	ERV1	0	799	2	2
856	4654	135	19	8	chr4	35525259	35526048	-154688507	-	LTR1A1	LTR	ERV1	0	799	2	2
878	1608	183	78	3	chr4	38430681	38430999	-151783556	+	MLT1B	LTR	ERVL-MaLR	47	390	0	2
882	1710	233	141	0	chr4	38999548	38999982	-151214573	-	MLT1D	LTR	ERVL-MaLR	0	505	1	2
896	3492	90	4	2	chr4	40885146	40885604	-149328951	+	LTR71A	LTR	ERV1	1	459	0	2
946	3100	118	11	2	chr4	47388994	47389445	-142825110	-	LTR71A	LTR	ERV1	-4	455	1	2
1013	1331	216	27	28	chr4	56123225	56123598	-134090957	-	MLT1A	LTR	ERVL-MaLR	0	467	3	2
1028	1712	236	44	44	chr4	58133415	58133897	-132080658	+	MLT1D	LTR	ERVL-MaLR	24	505	0	2
1035	1394	203	161	27	chr4	58999227	58999667	-131214888	+	LTR54	LTR	ERV1	1	510	0	2
1072	3021	134	4	0	chr4	63937897	63938353	-126276202	-	LTR71A	LTR	ERV1	0	459	2	2
1095	1567	187	29	90	chr4	66953743	66954142	-123260413	+	MLT1A	LTR	ERVL-MaLR	1	374	0	2
1133	1429	200	64	36	chr4	71866228	71866591	-118347964	+	MLT1A	LTR	ERVL-MaLR	1	374	0	2
1168	1663	222	89	38	chr4	76419376	76419854	-113794701	-	MLT1D	LTR	ERVL-MaLR	0	505	1	2
1171	1781	169	29	23	chr4	76907361	76907670	-113306885	-	MLT1A0	LTR	ERVL-MaLR	0	365	55	2
1234	1121	265	48	35	chr4	85079212	85079580	-105134975	+	MLT1A	LTR	ERVL-MaLR	1	373	-1	2
1260	2614	102	18	5	chr4	88549823	88550216	-101664339	+	LTR71A	LTR	ERV1	1	398	-61	2
1266	1515	218	78	43	chr4	89385929	89386371	-100828184	+	MLT1C	LTR	ERVL-MaLR	8	466	-1	2
1278	991	175	152	48	chr4	90958625	90958877	-99255678	+	MLT1A0	LTR	ERVL-MaLR	83	365	0	2
1284	1904	155	72	32	chr4	91676775	91677122	-98537433	+	THE1B	LTR	ERVL-MaLR	1	362	-2	2
1328	1138	237	63	13	chr4	97391114	97391430	-92823125	+	MLT1C	LTR	ERVL-MaLR	135	467	0	2
1355	456	334	134	53	chr4	101036947	101037459	-89177096	-	MLT1N2	LTR	ERVL-MaLR	-2	560	1	2
1421	1521	191	87	6	chr4	109677476	109677793	-80536762	+	MSTD	LTR	ERVL-MaLR	1	345	-51	2
1477	3138	102	37	0	chr4	117044311	117044753	-73169802	-	LTR71A	LTR	ERV1	0	459	1	2
1485	1802	211	58	26	chr4	118008610	118009062	-72205493	+	MLT1C	LTR	ERVL-MaLR	1	467	0	2
1485	1802	211	58	26	chr4	118008610	118009062	-72205493	+	MLT1C	LTR	ERVL-MaLR	1	467	0	2
1497	886	210	74	14	chr4	119612634	119612851	-70601704	+	MLT1A	LTR	ERVL-MaLR	144	374	0	2
1585	1484	208	78	27	chr4	131163507	131163872	-59050683	+	MLT1B	LTR	ERVL-MaLR	3	387	-3	2
1608	3259	105	4	13	chr4	134114246	134114709	-56099846	+	LTR71A	LTR	ERV1	1	459	0	2
1659	3475	75	11	7	chr4	140837263	140837720	-49376835	-	LTR71A	LTR	ERV1	0	459	1	2
1674	1298	215	42	50	chr4	142856687	142857047	-47357508	-	MLT1A0	LTR	ERVL-MaLR	-11	354	1	2
1771	1066	224	126	54	chr4	155483957	155484420	-34730135	-	MLT1D	LTR	ERVL-MaLR	0	505	5	3
1813	3162	104	13	7	chr4	161086769	161087225	-29127330	+	LTR71A	LTR	ERV1	1	459	0	3
1820	2144	199	83	17	chr4	161948909	161949380	-28265175	-	MLT1D	LTR	ERVL-MaLR	0	505	1	3
1827	1123	259	130	23	chr4	162858247	162858631	-27355924	-	MLT1D	LTR	ERVL-MaLR	0	505	75	3
1842	1339	224	11	86	chr4	164793444	164793829	-25420726	-	MLT1A	LTR	ERVL-MaLR	-18	356	1	3
1876	26822	67	4	11	chr4	169323855	169327208	-20887347	+	HERVL-int	LTR	ERVL	2324	5654	0	3
1932	1187	255	115	35	chr4	176660192	176660499	-13554056	-	MLT1D	LTR	ERVL-MaLR	-154	351	1	3
1932	1187	255	115	35	chr4	176660192	176660499	-13554056	-	MLT1D	LTR	ERVL-MaLR	-154	351	1	3
1949	1112	247	58	28	chr4	178806189	178806543	-11408012	-	MLT1A0	LTR	ERVL-MaLR	0	365	1	3
1949	1112	247	58	28	chr4	178806189	178806543	-11408012	-	MLT1A0	LTR	ERVL-MaLR	0	365	1	3
1993	3677	85	4	28	chr4	184667609	184668006	-5546549	-	LTR71A	LTR	ERV1	-61	398	1	3
1998	3710	92	0	9	chr4	185232097	185232560	-4981995	-	LTR71A	LTR	ERV1	0	459	1	3
2007	2488	156	27	22	chr4	186458049	186458368	-3756187	-	MER41B	LTR	ERV1	-125	509	187	3
2013	269	338	26	75	chr4	187208652	187208892	-3005663	-	LTR88b	LTR	Gypsy?	-86	751	524	3
632	1879	187	19	38	chr5	6212305	6212677	-175325582	+	MLT1A0	LTR	ERVL-MaLR	1	365	0	3
655	1113	225	133	37	chr5	9215327	9215701	-172322558	+	MLT1C	LTR	ERVL-MaLR	1	415	-52	3
662	1186	235	114	69	chr5	10130844	10131310	-171406949	+	MLT1D	LTR	ERVL-MaLR	12	501	-4	3
737	1314	288	54	15	chr5	19922986	19923455	-161614804	+	MLT1G	LTR	ERVL-MaLR	35	589	-2	3
775	1048	324	70	62	chr5	25018348	25019988	-156518271	-	PRIMA4-int	LTR	ERV1	-5188	2425	765	3
791	1613	253	41	30	chr5	27125843	27126303	-154411956	-	MLT1C	LTR	ERVL-MaLR	0	467	3	3
809	1562	201	86	70	chr5	29471209	29471308	-152066951	-	MLT1C	LTR	ERVL-MaLR	-233	234	144	3
820	1330	197	24	135	chr5	30877379	30877801	-150660458	+	MLT1A	LTR	ERVL-MaLR	1	374	0	3
820	1330	197	24	135	chr5	30877379	30877801	-150660458	+	MLT1A	LTR	ERVL-MaLR	1	374	0	3
826	30958	109	26	40	chr5	31591380	31592035	-149946224	-	ERV24_Prim-int	LTR	ERV1	-1576	5999	5378	3
842	743	238	13	42	chr5	33686522	33686747	-147851512	+	MLT1A	LTR	ERVL-MaLR	1	228	-162	3
843	1363	296	33	42	chr5	33922561	33923055	-147615204	-	LTR16C	LTR	ERVL	0	489	1	3
859	8007	204	54	17	chr5	36008558	36010128	-145528131	-	MSTA-int	LTR	ERVL-MaLR	0	1631	1	3
895	1843	161	41	11	chr5	40694404	40694762	-140843497	-	MLT1B	LTR	ERVL-MaLR	0	390	22	3
902	749	237	0	0	chr5	41657030	41657182	-139881077	-	MER21-int	LTR	ERVL	-3695	496	345	3
911	1821	186	33	11	chr5	42839167	42839548	-138698711	+	MLT1B	LTR	ERVL-MaLR	1	390	0	3
924	10134	183	60	98	chr5	44446904	44448960	-137089299	-	LTR49-int	LTR	ERV1	0	6331	4315	3
1035	2159	136	11	24	chr5	59066658	59066987	-122471272	+	MLT1A0	LTR	ERVL-MaLR	1	326	-39	3
1039	1454	178	165	3	chr5	59618699	59619038	-121919221	+	MLT1A1	LTR	ERVL-MaLR	1	405	-3	3
1068	1271	247	107	11	chr5	63433261	63433609	-118104650	+	MLT1D	LTR	ERVL-MaLR	4	388	-117	3
1090	1608	215	135	35	chr5	66226049	66226502	-115311757	-	MLT1D	LTR	ERVL-MaLR	0	505	1	3
1131	1362	203	91	45	chr5	71623952	71624308	-109913951	-	MLT1A	LTR	ERVL-MaLR	0	374	1	3
1147	815	270	88	43	chr5	73772677	73772981	-107765278	-	MER110A	LTR	ERV1	-137	331	2	3
1228	3545	81	2	2	chr5	84292759	84293218	-97245041	-	LTR71A	LTR	ERV1	0	459	1	3
1236	5600	300	54	43	chr5	85438900	85441498	-96096761	+	ERV3-16A3_I-int	LTR	ERVL	661	3288	-1938	3
1238	3268	91	13	2	chr5	85647706	85648160	-95890099	-	LTR71A	LTR	ERV1	0	459	1	3
1255	1767	186	37	32	chr5	87877450	87877822	-93660437	-	MLT1A	LTR	ERVL-MaLR	0	374	1	3
1272	1268	172	50	18	chr5	90114386	90114659	-91423600	-	MLT1C	LTR	ERVL-MaLR	-185	282	1	3
1289	2122	141	47	14	chr5	92352311	92352663	-89185596	+	THE1B	LTR	ERVL-MaLR	1	364	0	3
1331	1440	196	96	32	chr5	97869151	97869493	-83668766	-	MLT1A	LTR	ERVL-MaLR	-8	366	1	3
1352	3460	98	0	0	chr5	100646516	100646975	-80891284	-	LTR71A	LTR	ERV1	0	459	1	3
1361	3027	101	68	0	chr5	101788104	101788532	-79749727	-	LTR71A	LTR	ERV1	0	459	1	3
1361	3027	101	68	0	chr5	101788104	101788532	-79749727	-	LTR71A	LTR	ERV1	0	459	1	3
1362	2194	203	68	25	chr5	101926635	101927114	-79611145	+	MLT1D	LTR	ERVL-MaLR	1	501	-4	3
1362	2194	203	68	25	chr5	101926635	101927114	-79611145	+	MLT1D	LTR	ERVL-MaLR	1	501	-4	3
1410	1729	270	96	19	chr5	108187338	108187874	-73350385	+	MLT1E2	LTR	ERVL-MaLR	18	599	-28	3
1414	1309	211	56	9	chr5	108715603	108715928	-72822331	-	MLT1A0	LTR	ERVL-MaLR	0	365	25	3
1485	894	208	36	11	chr5	118022512	118022702	-63515557	+	MLT1A0	LTR	ERVL-MaLR	1	195	-170	3
1502	2177	248	67	7	chr5	120279732	120280296	-61257963	-	MLT1E2	LTR	ERVL-MaLR	-2	625	26	3
1515	1043	252	122	92	chr5	122017224	122017603	-59520656	-	MLT1C	LTR	ERVL-MaLR	-53	414	6	3
1545	3173	127	2	0	chr5	125928718	125929175	-55609084	+	LTR71A	LTR	ERV1	2	459	0	3
1580	3416	86	7	13	chr5	130541685	130542147	-50996112	-	LTR71A	LTR	ERV1	0	459	1	3
1661	1668	220	56	20	chr5	141045482	141045932	-40492327	-	MLT1C	LTR	ERVL-MaLR	0	467	1	3
1661	1668	220	56	20	chr5	141045482	141045932	-40492327	-	MLT1C	LTR	ERVL-MaLR	0	467	1	3
1669	1533	181	116	31	chr5	142170243	142170596	-39367663	-	MLT1B	LTR	ERVL-MaLR	-3	387	1	3
1746	1625	246	34	13	chr5	152232869	152233326	-29304933	+	MLT1C	LTR	ERVL-MaLR	1	467	0	3
1769	3567	81	2	4	chr5	155204062	155204522	-26333737	-	LTR71A	LTR	ERV1	0	459	1	3
1769	3567	81	2	4	chr5	155204062	155204522	-26333737	-	LTR71A	LTR	ERV1	0	459	1	3
1802	1505	246	32	62	chr5	159598008	159598394	-21939865	+	MLT1A	LTR	ERVL-MaLR	1	374	0	3
1803	2450	177	70	6	chr5	159767442	159767913	-21770346	-	MLT1D	LTR	ERVL-MaLR	0	505	3	3
1827	2952	130	13	30	chr5	162897948	162898415	-18639844	+	LTR71A	LTR	ERV1	1	459	0	3
1845	1317	259	28	62	chr5	165214556	165214960	-16323299	-	MLT1B	LTR	ERVL-MaLR	0	390	1	3
1908	526	312	117	62	chr5	173529804	173530238	-8008021	+	MLT1L	LTR	ERVL-MaLR	150	610	0	3
1920	1604	186	88	38	chr5	175093617	175093963	-6444296	-	MLT1A0	LTR	ERVL-MaLR	0	365	1	3
630	558	287	137	56	chr6	5901968	5902341	-164903638	+	MLT1M	LTR	ERVL-MaLR	4	411	-261	3
630	1281	208	97	74	chr6	6017495	6017858	-164788121	+	MLT1A	LTR	ERVL-MaLR	1	372	-2	3
664	2386	289	46	11	chr6	10475017	10475747	-160330232	+	HERV16-int	LTR	ERVL	287	1043	-3953	3
687	2488	214	24	35	chr6	13450375	13450922	-157355057	-	MER68	LTR	ERVL	0	563	23	3
693	1466	236	127	31	chr6	14268807	14269262	-156536717	-	MLT1D	LTR	ERVL-MaLR	0	505	1	3
696	2386	190	21	21	chr6	14580773	14581129	-156224850	+	MLT1C	LTR	ERVL-MaLR	103	466	-1	3
705	1970	216	52	65	chr6	15826047	15826558	-154979421	+	MLT1D	LTR	ERVL-MaLR	1	504	-1	3
730	1260	261	16	66	chr6	19037196	19037590	-151768389	-	MLT1A	LTR	ERVL-MaLR	0	374	1	3
730	1676	199	13	87	chr6	19068495	19068897	-151737082	-	MLT1A	LTR	ERVL-MaLR	0	374	3	3
739	1568	188	153	2	chr6	20203664	20204085	-150601894	+	LTR54B	LTR	ERV1	1	496	-2	3
754	1036	210	102	66	chr6	22206578	22206925	-148599054	+	MLT1A	LTR	ERVL-MaLR	1	361	-13	3
776	1065	286	125	20	chr6	25123602	25124447	-145681532	-	LTR78	LTR	ERV1	-363	941	1	3
835	1694	195	44	9	chr6	32808624	32808971	-137997008	+	MLT1A0	LTR	ERVL-MaLR	6	365	0	3
836	1704	146	80	63	chr6	33021544	33021924	-137784055	+	MLT1B	LTR	ERVL-MaLR	1	387	-3	3
849	1679	211	67	16	chr6	34679641	34680080	-136125899	+	MLT1C	LTR	ERVL-MaLR	5	467	0	3
920	2008	200	15	50	chr6	43996494	43996969	-126809010	-	MLT1C	LTR	ERVL-MaLR	-9	458	1	3
953	2725	107	0	5	chr6	48242332	48242709	-122563270	+	THE1C	LTR	ERVL-MaLR	1	375	0	3
974	1830	238	81	0	chr6	51106456	51106910	-119699069	+	MLT1D	LTR	ERVL-MaLR	12	505	0	3
987	549	187	143	57	chr6	52729229	52729388	-118076591	+	MLT1C	LTR	ERVL-MaLR	2	176	-291	3
1021	1809	214	49	28	chr6	57263228	57263685	-113542294	-	MLT1C	LTR	ERVL-MaLR	0	467	1	3
1048	2001	201	63	35	chr6	60699129	60699619	-110106360	-	MLT1D	LTR	ERVL-MaLR	0	505	1	3
1057	1131	213	110	40	chr6	61918333	61918680	-108887299	+	MLT1A	LTR	ERVL-MaLR	1	374	0	3
1067	1524	228	16	56	chr6	63189600	63189990	-107615989	-	MLT1A	LTR	ERVL-MaLR	0	374	1	3
1125	1717	231	102	35	chr6	70895868	70896387	-99909592	+	MER68B	LTR	ERVL	3	560	-4	3
1140	1367	246	24	94	chr6	72745675	72746177	-98059802	-	MLT1C	LTR	ERVL-MaLR	-1	466	1	3
1149	2530	130	10	13	chr6	73939484	73939874	-96866105	+	MLT1B	LTR	ERVL-MaLR	2	390	0	3
1156	1142	230	26	15	chr6	74881022	74881283	-95924696	+	MLT1A0	LTR	ERVL-MaLR	102	365	0	3
1156	1142	230	26	15	chr6	74881022	74881283	-95924696	+	MLT1A0	LTR	ERVL-MaLR	102	365	0	3
1167	1407	209	27	106	chr6	76307579	76307986	-94497993	-	MLT1A	LTR	ERVL-MaLR	0	374	1	3
1176	2497	261	48	43	chr6	77542164	77543666	-93262313	+	L1ME1	LINE	L1	4534	6041	-138	3
1182	1043	246	53	23	chr6	78268766	78269024	-92536955	+	MLT1A0	LTR	ERVL-MaLR	98	363	-2	3
1191	1709	69	8	106	chr6	79529322	79529614	-91276365	+	LTR71A	LTR	ERV1	2	264	-195	3
1191	1709	69	8	106	chr6	79529322	79529614	-91276365	+	LTR71A	LTR	ERV1	2	264	-195	3
1256	3566	79	2	4	chr6	87997645	87998105	-82807874	-	LTR71A	LTR	ERV1	0	459	1	3
1280	1780	174	28	73	chr6	91215841	91216250	-79589729	+	MLT1B	LTR	ERVL-MaLR	1	390	0	3
1321	574	245	145	57	chr6	96508097	96508370	-74297609	-	MLT1D	LTR	ERVL-MaLR	-175	330	22	3
1398	2398	141	141	22	chr6	106577574	106578018	-64227961	+	MLT1D	LTR	ERVL-MaLR	1	505	0	3
1416	1394	211	118	15	chr6	108982165	108982492	-61823487	-	MLT1A0	LTR	ERVL-MaLR	0	365	1	3
1482	3429	83	17	2	chr6	117665356	117665812	-53140167	-	LTR2	LTR	ERV1	0	463	1	3
1489	1352	185	167	5	chr6	118542797	118543189	-52262790	+	LTR54B	LTR	ERV1	27	494	-4	3
1504	23346	75	5	2	chr6	120506017	120509018	-50296961	-	HERVL-int	LTR	ERVL	0	5654	2644	3
1547	733	232	10	52	chr6	126160018	126160246	-44645733	-	MLT1C	LTR	ERVL-MaLR	-172	218	3	3
1565	1716	221	37	7	chr6	128555126	128555577	-42250402	+	MLT1C	LTR	ERVL-MaLR	1	465	-2	3
1578	1154	232	45	48	chr6	130256981	130257356	-40548623	+	MLT1A	LTR	ERVL-MaLR	1	374	0	3
1608	1596	220	30	3	chr6	134119673	134120028	-36685951	-	MLT1A0	LTR	ERVL-MaLR	0	365	1	3
1699	1202	264	60	96	chr6	146088967	146089534	-24716445	+	MLT1E1A	LTR	ERVL-MaLR	28	680	0	3
1719	2410	126	36	11	chr6	148636364	148636741	-22169238	+	MLT1B	LTR	ERVL-MaLR	3	389	-1	3
1720	1431	209	102	23	chr6	148870943	148871110	-21934869	+	MLT1A	LTR	ERVL-MaLR	1	173	-201	3
1798	2704	92	143	10	chr6	159106744	159107161	-11698818	+	MER51E	LTR	ERV1	1	482	0	3
1823	986	171	152	58	chr6	162268186	162268519	-8537460	+	MLT1A0	LTR	ERVL-MaLR	1	428	0	3
1833	1787	193	8	27	chr6	163704156	163704528	-7101451	+	MLT1A0	LTR	ERVL-MaLR	1	365	0	3
1833	1787	193	8	27	chr6	163704156	163704528	-7101451	+	MLT1A0	LTR	ERVL-MaLR	1	365	0	3
1856	1778	224	48	9	chr6	166644698	166645139	-4160840	+	MLT1C	LTR	ERVL-MaLR	1	459	-8	3
1882	1729	170	133	31	chr6	170036872	170037255	-768724	-	MSTA	LTR	ERVL-MaLR	0	428	1	3
626	1201	276	71	44	chr7	5492521	5492972	-153853001	+	MLT1C	LTR	ERVL-MaLR	4	467	0	3
644	1590	147	126	36	chr7	7803561	7803892	-151542081	-	MLT1A0	LTR	ERVL-MaLR	0	365	1	3
701	2567	253	28	30	chr7	15230368	15231056	-144114917	+	MER76	LTR	ERVL	2	687	-4	3
743	1762	173	137	94	chr7	20761824	20762303	-138583670	-	MLT1D	LTR	ERVL-MaLR	-2	503	1	3
749	3609	112	0	0	chr7	21555890	21556347	-137789626	-	LTR71A	LTR	ERV1	0	459	3	3
787	1835	241	68	40	chr7	26565814	26566345	-132779628	-	MLT1F2	LTR	ERVL-MaLR	-11	549	3	3
809	1451	222	65	25	chr7	29434316	29434713	-129911260	-	MLT1C	LTR	ERVL-MaLR	-2	465	52	3
872	1287	166	190	47	chr7	37622765	37623082	-121722891	-	MLT1A	LTR	ERVL-MaLR	-1	373	1	3
879	1301	223	53	53	chr7	38561634	38562008	-120783965	+	MLT1A	LTR	ERVL-MaLR	1	374	0	3
909	2047	174	101	20	chr7	42593868	42594313	-116751660	+	MLT1D	LTR	ERVL-MaLR	21	505	0	3
991	1523	210	41	24	chr7	53227489	53227850	-106118123	+	MLT1A	LTR	ERVL-MaLR	4	462	-5	3
1098	1264	174	57	72	chr7	67367553	67367857	-91978116	+	MLT1A0	LTR	ERVL-MaLR	1	299	-66	3
1125	433	250	94	66	chr7	70831171	70831368	-88514605	+	LTR78	LTR	ERV1	173	375	-929	3
1128	245	185	165	12	chr7	71279184	71279266	-88066707	-	MLT1C	LTR	ERVL-MaLR	-260	207	111	3
1128	245	185	165	12	chr7	71279184	71279266	-88066707	-	MLT1C	LTR	ERVL-MaLR	-260	207	111	3
1194	2238	182	25	0	chr7	79858281	79858677	-79487296	-	MER74C	LTR	ERVL	0	460	55	3
1198	957	231	83	30	chr7	80413615	80413772	-78932201	+	MLT1B	LTR	ERVL-MaLR	4	172	-218	3
1214	1549	237	43	45	chr7	82532043	82532511	-76813462	-	MLT1C	LTR	ERVL-MaLR	0	467	1	3
1214	1549	237	43	45	chr7	82532043	82532511	-76813462	-	MLT1C	LTR	ERVL-MaLR	0	467	1	3
1237	462	377	84	12	chr7	85516624	85516944	-73829029	+	LTR78B	LTR	ERV1	472	816	-480	3
1250	44327	73	10	12	chr7	87278706	87284372	-72061601	+	HERVL-int	LTR	ERVL	1	5654	0	3
1294	971	217	106	92	chr7	92975612	92975927	-66370046	+	MLT1B	LTR	ERVL-MaLR	1	320	-70	3
1321	3599	234	82	72	chr7	96505403	96505568	-62840405	-	L1MC5	LINE	L1	-689	8615	8442	3
1346	3367	91	9	26	chr7	99808819	99809199	-59536774	-	LTR71A	LTR	ERV1	-61	398	15	3
1381	1453	207	10	17	chr7	104421772	104422078	-54923895	+	MLT1A0	LTR	ERVL-MaLR	1	321	-69	3
1417	1104	268	68	78	chr7	109067912	109068309	-50277664	-	MLT1C	LTR	ERVL-MaLR	-55	412	11	3
1451	3481	98	0	4	chr7	113519496	113519957	-45826016	-	LTR71A	LTR	ERV1	0	459	1	3
1530	1704	168	35	94	chr7	123970110	123970472	-35375501	-	MLT1B	LTR	ERVL-MaLR	-3	387	48	3
1531	1444	227	24	27	chr7	124017882	124018257	-35327716	+	MLT1A	LTR	ERVL-MaLR	1	374	0	3
1546	1160	251	171	35	chr7	126006652	126007115	-33338858	+	MLT1E1	LTR	ERVL-MaLR	116	654	0	3
1546	1160	251	171	35	chr7	126006652	126007115	-33338858	+	MLT1E1	LTR	ERVL-MaLR	116	654	0	3
1629	1623	189	49	14	chr7	136969834	136970188	-22375785	-	MLT1A	LTR	ERVL-MaLR	-4	370	4	3
1636	1821	202	28	19	chr7	137885838	137886197	-21459776	+	MLT1A0	LTR	ERVL-MaLR	2	363	-2	3
1654	1439	232	63	23	chr7	140246476	140246917	-19099056	-	MLT1C	LTR	ERVL-MaLR	0	467	8	3
1687	1755	311	88	69	chr7	144563806	144565551	-14780422	+	HERV16-int	LTR	ERVL	582	2507	-2489	3
1689	4063	141	23	39	chr7	144762961	144763683	-14582290	+	MER50	LTR	ERV1	1	710	-24	3
1724	2366	204	97	24	chr7	149380556	149381099	-9964874	+	MLT1E1A	LTR	ERVL-MaLR	6	592	-88	3
1740	1340	123	9	5	chr7	151442126	151442347	-7903626	+	MER34	LTR	ERV1	321	542	0	3
1750	1978	194	67	14	chr7	152756217	152756655	-6589318	+	MLT1C	LTR	ERVL-MaLR	3	465	-2	3
1750	1978	194	67	14	chr7	152756217	152756655	-6589318	+	MLT1C	LTR	ERVL-MaLR	3	465	-2	3
1768	1722	176	55	24	chr7	155158713	155159068	-4186905	-	MLT1B	LTR	ERVL-MaLR	-16	374	14	3
613	1714	204	38	19	chr8	3675464	3675828	-141462808	+	MLT1A	LTR	ERVL-MaLR	1	371	-3	3
633	1448	203	22	112	chr8	6395680	6396080	-138742556	-	MLT1A0	LTR	ERVL-MaLR	-2	363	1	3
670	1502	232	39	43	chr8	11177441	11177910	-133960726	+	MLT1C	LTR	ERVL-MaLR	1	467	0	3
731	1075	223	143	79	chr8	19193227	19193548	-125945088	-	MLT1D	LTR	ERVL-MaLR	-2	503	140	3
748	1681	211	37	27	chr8	21381858	21382228	-123756408	-	MLT1A	LTR	ERVL-MaLR	0	374	1	3
748	1300	213	67	20	chr8	21448217	21448551	-123690085	+	MLT1C	LTR	ERVL-MaLR	82	592	-35	3
794	1781	143	43	9	chr8	27499683	27500000	-117638636	-	MLT1B	LTR	ERVL-MaLR	0	390	63	3
858	3134	88	39	26	chr8	35785702	35786155	-109352481	-	LTR71A	LTR	ERV1	0	459	1	3
945	1311	139	15	85	chr8	47285573	47285856	-97852780	-	MLT1B	LTR	ERVL-MaLR	-127	263	1	3
952	1618	204	40	12	chr8	48111549	48111912	-97026724	-	MLT1A	LTR	ERVL-MaLR	0	457	1	3
979	1428	205	49	24	chr8	51646044	51646424	-93492212	+	MLT1B	LTR	ERVL-MaLR	1	390	0	3
993	10806	149	12	2	chr8	53486506	53488143	-91650493	+	HERVL18-int	LTR	ERVL	4394	6047	0	3
996	1659	201	94	60	chr8	53913411	53913861	-91224775	+	MLT1C	LTR	ERVL-MaLR	1	467	0	3
1011	2285	148	8	33	chr8	55843428	55843826	-89294810	+	MLT1B	LTR	ERVL-MaLR	3	390	0	3
1019	1191	221	108	79	chr8	56923033	56923515	-88215121	+	MLT1D	LTR	ERVL-MaLR	8	505	0	3
1023	2279	163	5	10	chr8	57490541	57490931	-87647705	+	MLT1B	LTR	ERVL-MaLR	1	388	-2	3
1057	1432	208	93	16	chr8	61988766	61989142	-83149494	+	MLT1A1	LTR	ERVL-MaLR	1	408	0	3
1063	1601	231	78	37	chr8	62745982	62746464	-82392172	-	MLT1D	LTR	ERVL-MaLR	-2	503	1	3
1066	1664	234	31	42	chr8	63108547	63108814	-82029822	-	MLT1D	LTR	ERVL-MaLR	-205	300	35	3
1088	2151	173	16	3	chr8	66008510	66008870	-79129766	+	MLT1B	LTR	ERVL-MaLR	1	365	-25	3
1089	2178	129	3	62	chr8	66108183	66108587	-79030049	-	MLT1B	LTR	ERVL-MaLR	-5	385	6	3
1091	1009	179	13	118	chr8	66416227	66416412	-78722224	-	MLT1B	LTR	ERVL-MaLR	-68	322	165	3
1197	2188	199	71	35	chr8	80325801	80326286	-64812350	-	MLT1D	LTR	ERVL-MaLR	-1	504	1	3
1212	1411	245	66	56	chr8	82206925	82207374	-62931262	-	MLT1D	LTR	ERVL-MaLR	-33	472	19	3
1225	1245	299	57	45	chr8	83952916	83953403	-61185233	+	LTR40a	LTR	ERVL	7	499	-20	3
1291	1762	214	30	26	chr8	92609454	92609919	-52528717	-	MLT1C	LTR	ERVL-MaLR	0	467	1	3
1302	1502	201	70	35	chr8	94088722	94089124	-51049512	-	MLT1C	LTR	ERVL-MaLR	-45	422	6	3
1302	1502	201	70	35	chr8	94088722	94089124	-51049512	-	MLT1C	LTR	ERVL-MaLR	-45	422	6	3
1352	2681	185	45	38	chr8	100562384	100562885	-44575751	-	MLT1D	LTR	ERVL-MaLR	0	505	1	3
1352	1311	205	76	49	chr8	100653351	100653736	-44484900	+	MLT1C	LTR	ERVL-MaLR	65	460	-7	3
1394	1152	228	56	58	chr8	106061996	106062410	-39076226	+	MLT1C	LTR	ERVL-MaLR	3	415	-52	3
1394	1152	228	56	58	chr8	106061996	106062410	-39076226	+	MLT1C	LTR	ERVL-MaLR	3	415	-52	3
1397	1445	234	30	38	chr8	106439099	106439464	-38699172	+	MLT1A	LTR	ERVL-MaLR	1	362	-12	3
1452	1471	211	64	50	chr8	113734930	113735314	-31403322	-	MLT1B	LTR	ERVL-MaLR	0	390	1	3
1465	4163	126	5	8	chr8	115386250	115386867	-29751769	-	MER41B	LTR	ERV1	0	634	20	3
1465	4163	126	5	8	chr8	115386250	115386867	-29751769	-	MER41B	LTR	ERV1	0	634	20	3
1507	644	232	32	7	chr8	120974618	120974770	-24163866	-	MLT1B	LTR	ERVL-MaLR	-200	174	19	3
1525	1353	205	18	4	chr8	123281486	123281755	-21856881	-	MLT1B	LTR	ERVL-MaLR	-114	276	4	3
1600	1321	237	127	20	chr8	133118758	133119201	-12019435	+	MLT1D	LTR	ERVL-MaLR	9	505	0	3
1615	1280	206	62	95	chr8	135076234	135076718	-10061918	-	MLT1C	LTR	ERVL-MaLR	0	467	1	3
1650	1468	199	43	21	chr8	139675345	139675684	-5462952	+	MLT1A0	LTR	ERVL-MaLR	19	365	0	4
1650	1980	158	65	22	chr8	139688897	139689266	-5449370	+	MLT1B	LTR	ERVL-MaLR	4	389	-1	4
606	848	239	87	42	chr9	2755429	2755669	-135639048	-	MLT1B	LTR	ERVL-MaLR	-136	254	3	4
660	832	196	193	6	chr9	9885495	9885858	-128508859	+	MLT1D	LTR	ERVL-MaLR	59	494	-11	4
660	832	196	193	6	chr9	9885495	9885858	-128508859	+	MLT1D	LTR	ERVL-MaLR	59	494	-11	4
691	1849	177	25	11	chr9	13949523	13949883	-124444834	-	MLT1A0	LTR	ERVL-MaLR	0	365	1	4
735	2023	160	33	35	chr9	19664537	19664997	-118729720	+	MLT1C	LTR	ERVL-MaLR	8	466	-1	4
736	3356	107	0	11	chr9	19808467	19808931	-118585786	-	LTR71A	LTR	ERV1	0	459	1	4
791	3054	112	4	50	chr9	27080852	27081333	-111313384	+	LTR71A	LTR	ERV1	1	459	0	4
845	1763	157	85	73	chr9	34158616	34159001	-104235716	+	MLT1B	LTR	ERVL-MaLR	1	390	0	4
845	1763	157	85	73	chr9	34158616	34159001	-104235716	+	MLT1B	LTR	ERVL-MaLR	1	390	0	4
877	1570	183	198	17	chr9	38363688	38364100	-100030617	-	MLT1D	LTR	ERVL-MaLR	0	505	1	4
886	3379	117	13	2	chr9	39527474	39527928	-98866789	+	LTR71A	LTR	ERV1	1	459	0	4
887	9594	168	47	5	chr9	39709887	39713738	-98680979	+	ERVL-B4-int	LTR	ERVL	1656	5714	0	4
903	2610	99	3	11	chr9	41770502	41770881	-96623836	-	MER41B	LTR	ERV1	-258	376	1	4
907	3442	112	13	2	chr9	42282816	42283270	-96111447	+	LTR71A	LTR	ERV1	1	459	0	4
1048	9593	170	34	4	chr9	60757441	60759217	-77635500	-	ERVL-B4-int	LTR	ERVL	0	5714	3883	4
1054	2566	107	3	11	chr9	61544429	61544808	-76849909	+	MER41B	LTR	ERV1	1	376	-258	4
1057	2635	96	3	11	chr9	61982197	61982576	-76412141	-	MER41B	LTR	ERV1	-258	376	1	4
1062	9524	172	34	4	chr9	62628678	62630454	-75764263	-	ERVL-B4-int	LTR	ERVL	0	5714	3883	4
1084	2672	108	18	10	chr9	65475310	65475702	-72919015	+	MER41B	LTR	ERV1	1	395	-239	4
1093	9540	170	35	5	chr9	66663196	66664972	-71729745	-	ERVL-B4-int	LTR	ERVL	0	5714	3883	4
1094	3184	115	13	2	chr9	66837372	66837826	-71556891	-	LTR71A	LTR	ERV1	0	459	1	4
1100	2733	108	18	10	chr9	67605571	67605963	-70788754	+	MER41B	LTR	ERV1	1	395	-239	4
1107	198	302	40	68	chr9	68494380	68494483	-69900234	-	MIR3	SINE	MIR	-13	195	96	4
1159	1881	204	33	11	chr9	75270170	75270526	-63124191	+	MLT1A0	LTR	ERVL-MaLR	2	365	0	4
1159	1776	165	40	0	chr9	75296886	75297201	-63097516	-	MLT1B	LTR	ERVL-MaLR	0	390	63	4
1189	735	186	105	0	chr9	79236205	79236350	-59158367	-	MLT2F	LTR	ERVL	-2	661	500	4
1192	1640	225	30	22	chr9	79686381	79686836	-58707881	+	MLT1C	LTR	ERVL-MaLR	7	465	-2	4
1204	1417	216	52	39	chr9	81213908	81214270	-57180447	+	MLT1A	LTR	ERVL-MaLR	1	367	-7	4
1277	4177	257	69	66	chr9	90789074	90790421	-47604296	+	L1MB8	LINE	L1	10	1352	-5515	4
1349	2061	192	16	60	chr9	100263224	100263740	-38130977	-	MLT1D	LTR	ERVL-MaLR	0	505	13	4
1360	1573	193	66	23	chr9	101611129	101611521	-36783196	-	MLT1C	LTR	ERVL-MaLR	-52	415	6	4
1403	1759	219	56	14	chr9	107266885	107267330	-31127387	-	MLT1C	LTR	ERVL-MaLR	-2	465	1	4
1428	1366	164	0	14	chr9	110495218	110495441	-27899276	+	MLT1D	LTR	ERVL-MaLR	1	220	-285	4
1433	731	235	68	17	chr9	111210579	111210824	-27183893	-	MLT1D	LTR	ERVL-MaLR	-224	243	1	4
1470	1514	237	77	25	chr9	116065318	116065760	-22328957	+	MLT1C	LTR	ERVL-MaLR	1	467	0	4
1486	2720	142	53	2	chr9	118178823	118179253	-20215464	+	MSTB2	LTR	ERVL-MaLR	1	453	-4	4
1499	2387	201	60	58	chr9	119821604	119822107	-18572610	+	MLT1D	LTR	ERVL-MaLR	2	505	0	4
714	2094	139	36	51	chr10	17005775	17006170	-116791252	+	MLT1B	LTR	ERVL-MaLR	1	389	-1	3
735	1741	194	33	50	chr10	19760360	19760757	-114036665	+	MLT1B	LTR	ERVL-MaLR	1	390	0	4
748	1360	271	85	46	chr10	21427680	21428199	-112369223	-	MLT1H	LTR	ERVL-MaLR	0	549	9	4
863	1679	209	52	20	chr10	36563424	36563819	-97233603	+	MLT1A1	LTR	ERVL-MaLR	1	408	0	4
873	1962	181	28	36	chr10	37782480	37782951	-96014471	+	MLT1C	LTR	ERVL-MaLR	1	467	0	4
953	3420	94	4	2	chr10	48334721	48335179	-85462243	-	LTR71A	LTR	ERV1	0	459	1	4
977	3464	79	18	0	chr10	51380602	51381043	-82416379	+	LTR71A	LTR	ERV1	3	451	-8	4
1021	807	203	191	25	chr10	57175954	57176236	-76621186	-	MLT1B	LTR	ERVL-MaLR	0	374	1	4
1024	2107	212	59	21	chr10	57655278	57655754	-76141668	+	MLT1D	LTR	ERVL-MaLR	1	495	-10	4
1028	1575	238	11	84	chr10	58173072	58173323	-75624099	+	MLT1C	LTR	ERVL-MaLR	25	261	-206	4
1074	1185	196	166	76	chr10	64184219	64184639	-69612783	+	MLT1C	LTR	ERVL-MaLR	3	467	0	4
1091	1678	180	48	38	chr10	66363240	66363610	-67433812	+	MLT1A	LTR	ERVL-MaLR	1	374	0	4
1115	2458	125	15	61	chr10	69483287	69483562	-64313860	-	MLT1B	LTR	ERVL-MaLR	-113	277	1	4
1184	1582	223	44	0	chr10	78596885	78597208	-55200214	+	MLT1A0	LTR	ERVL-MaLR	24	361	-4	4
1185	1597	199	56	70	chr10	78770085	78770554	-55026868	-	MLT1C	LTR	ERVL-MaLR	0	467	6	4
1259	1539	226	84	30	chr10	88399803	88400231	-45397191	-	MLT1D	LTR	ERVL-MaLR	-40	465	13	5
1283	2056	202	3	30	chr10	91548762	91549160	-42248262	-	MLT1B	LTR	ERVL-MaLR	-3	387	1	5
1294	7447	161	32	22	chr10	93019281	93020669	-40776753	+	LTR49-int	LTR	ERV1	4772	6173	-158	5
1324	1644	225	21	18	chr10	96937045	96937425	-36859997	+	MLT1C	LTR	ERVL-MaLR	86	466	-1	5
1352	1633	230	50	76	chr10	100641326	100641688	-33155734	-	MLT1C	LTR	ERVL-MaLR	-108	359	5	5
1357	465	291	130	77	chr10	101197920	101198261	-32599161	-	MLT1O	LTR	ERVL-MaLR	-63	479	104	5
1364	3512	82	11	0	chr10	102193132	102193586	-31603836	-	LTR71A	LTR	ERV1	0	459	1	5
1364	3204	123	9	0	chr10	102204396	102204851	-31592571	-	LTR71A	LTR	ERV1	0	459	1	5
1372	13459	136	2	6	chr10	103211678	103212679	-30584743	+	HERVH-int	LTR	ERV1	5018	6013	-1700	5
1372	13459	136	2	6	chr10	103211678	103212679	-30584743	+	HERVH-int	LTR	ERV1	5018	6013	-1700	5
1409	1172	235	50	24	chr10	108071302	108071694	-25725728	-	MLT1D	LTR	ERVL-MaLR	-77	428	1	5
1433	1779	180	52	11	chr10	111199272	111199643	-22597779	-	MLT1B	LTR	ERVL-MaLR	0	390	4	5
1454	1126	256	158	21	chr10	113973653	113974087	-19823335	-	MLT1D	LTR	ERVL-MaLR	0	505	1	5
1482	2198	198	24	34	chr10	117699524	117699990	-16097432	+	MLT1C	LTR	ERVL-MaLR	6	466	-1	5
1482	2198	198	24	34	chr10	117699524	117699990	-16097432	+	MLT1C	LTR	ERVL-MaLR	6	466	-1	5
1502	1308	202	131	66	chr10	120227324	120227780	-13569642	-	MLT1D	LTR	ERVL-MaLR	-2	503	14	5
1523	2019	171	82	53	chr10	123052143	123052618	-10744804	-	MLT1D	LTR	ERVL-MaLR	0	505	16	5
1531	1391	231	33	3	chr10	124006902	124007227	-9790195	+	MLT1B	LTR	ERVL-MaLR	4	338	-52	5
1537	1347	232	32	12	chr10	124892830	124893169	-8904253	-	MLT1C	LTR	ERVL-MaLR	-100	405	53	5
1547	1553	223	65	46	chr10	126131434	126131975	-7665447	+	MLT1A	LTR	ERVL-MaLR	1	553	-42	5
1556	1988	198	39	35	chr10	127349590	127350050	-6447372	-	MLT1C	LTR	ERVL-MaLR	-2	465	4	5
1567	579	247	60	73	chr10	128725588	128726052	-5071370	-	MLT1A	LTR	ERVL-MaLR	-16	451	6	5
595	3004	66	5	0	chr11	1326242	1326635	-133759987	-	LTR71A	LTR	ERV1	-64	395	1	5
650	1684	186	41	22	chr11	8587893	8588251	-126498371	-	MLT1A0	LTR	ERVL-MaLR	0	365	1	5
670	1943	192	49	89	chr11	11241464	11241978	-123844644	+	MLT1D	LTR	ERVL-MaLR	6	497	-8	5
670	1943	192	49	89	chr11	11241464	11241978	-123844644	+	MLT1D	LTR	ERVL-MaLR	6	497	-8	5
720	2365	185	99	17	chr11	17703593	17704054	-117382568	-	MLT1D	LTR	ERVL-MaLR	0	505	3	5
720	2365	185	99	17	chr11	17703593	17704054	-117382568	-	MLT1D	LTR	ERVL-MaLR	0	505	3	5
793	887	201	34	42	chr11	27276156	27276395	-107810227	+	MLT1A	LTR	ERVL-MaLR	138	374	0	6
795	1683	204	36	8	chr11	27604451	27604806	-107481816	+	MLT1A0	LTR	ERVL-MaLR	1	365	0	6
816	934	185	36	20	chr11	30312266	30312574	-104774048	-	MLT1A0	LTR	ERVL-MaLR	0	396	10	6
862	1607	192	48	38	chr11	36405668	36406015	-98680607	-	MLT1A	LTR	ERVL-MaLR	-5	369	19	6
863	1426	216	57	37	chr11	36539034	36539414	-98547208	+	MLT1B	LTR	ERVL-MaLR	3	390	0	6
866	1678	229	32	51	chr11	36937672	36938146	-98148476	-	MLT1C	LTR	ERVL-MaLR	-2	465	1	6
870	1449	212	46	12	chr11	37442223	37442562	-97644060	-	MLT1A0	LTR	ERVL-MaLR	-4	361	11	6
910	1476	201	49	59	chr11	42670082	42670474	-92416148	+	MLT1B	LTR	ERVL-MaLR	1	388	-2	6
919	1434	227	65	25	chr11	43873327	43873770	-91212852	-	MLT1C	LTR	ERVL-MaLR	0	467	6	6
919	1434	227	65	25	chr11	43873327	43873770	-91212852	-	MLT1C	LTR	ERVL-MaLR	0	467	6	6
924	1780	199	32	35	chr11	44519266	44519641	-90566981	-	MLT1A	LTR	ERVL-MaLR	0	374	1	6
929	1155	231	88	10	chr11	45179449	45179763	-89906859	-	MLT1A	LTR	ERVL-MaLR	0	374	34	6
1019	3387	101	9	0	chr11	56949867	56950322	-78136300	+	LTR71A	LTR	ERV1	1	459	0	6
1091	1730	136	93	46	chr11	66403131	66403477	-68683145	+	MLT1B	LTR	ERVL-MaLR	1	364	-26	6
1105	1257	197	149	44	chr11	68204226	68204611	-66882011	+	MLT1D	LTR	ERVL-MaLR	1	444	-61	6
1111	956	228	84	30	chr11	68961943	68962263	-66124359	+	MLT1D	LTR	ERVL-MaLR	70	442	-63	6
1123	1509	273	70	33	chr11	70619164	70619645	-64466977	-	MLT1D	LTR	ERVL-MaLR	-4	501	2	6
1123	1326	226	98	17	chr11	70630463	70630885	-64455737	+	MLT1C	LTR	ERVL-MaLR	8	467	0	6
1161	4520	316	65	35	chr11	75578933	75580506	-59506116	+	ERVL-E-int	LTR	ERVL	1616	3324	-2330	6
1204	3155	137	0	0	chr11	81196759	81197218	-53889404	+	LTR71A	LTR	ERV1	1	459	0	6
1204	3304	109	2	7	chr11	81202105	81202566	-53884056	+	LTR71A	LTR	ERV1	1	459	0	6
1210	1407	229	41	30	chr11	81983533	81983897	-53102725	-	MLT1A	LTR	ERVL-MaLR	-4	370	3	6
1221	1873	188	35	22	chr11	83390973	83391337	-51695285	+	MLT1A	LTR	ERVL-MaLR	6	374	0	7
1224	1114	224	95	29	chr11	83766800	83767202	-51319420	-	MLT1D	LTR	ERVL-MaLR	-41	464	10	7
1224	1554	235	28	52	chr11	83851194	83851342	-51235280	+	MLT1C	LTR	ERVL-MaLR	37	177	-290	7
1240	1083	238	103	87	chr11	85966606	85967052	-49119570	+	MLT1C	LTR	ERVL-MaLR	9	462	-5	7
1281	620	213	72	13	chr11	91233379	91233536	-43853086	-	MLT1B	LTR	ERVL-MaLR	-221	169	3	7
1288	2112	182	107	7	chr11	92200123	92200577	-42886045	+	MLT1D	LTR	ERVL-MaLR	1	505	0	7
1291	1809	214	26	47	chr11	92573442	92573913	-42512709	+	MLT1C	LTR	ERVL-MaLR	7	467	0	7
1296	14808	226	13	2	chr11	93265534	93268631	-41817991	+	HERVIP10F-int	LTR	ERV1	4603	7735	-2	7
1304	3562	75	9	4	chr11	94278284	94278741	-40807881	+	LTR71A	LTR	ERV1	1	459	0	7
1346	973	270	38	7	chr11	99757070	99757350	-35329272	-	MLT1C	LTR	ERVL-MaLR	-90	377	89	7
1346	973	270	38	7	chr11	99757070	99757350	-35329272	-	MLT1C	LTR	ERVL-MaLR	-90	377	89	7
1346	421	215	94	15	chr11	99757347	99757484	-35329138	-	MLT1C	LTR	ERVL-MaLR	-230	237	89	7
1346	704	209	112	28	chr11	99757481	99757693	-35328929	-	MLT1C	LTR	ERVL-MaLR	-230	237	6	7
1356	1538	249	47	28	chr11	101145178	101145636	-33940986	-	MLT1C	LTR	ERVL-MaLR	0	467	1	7
1377	1691	189	44	39	chr11	103890110	103890473	-31196149	+	MLT1A0	LTR	ERVL-MaLR	1	365	0	7
1377	1691	189	44	39	chr11	103890110	103890473	-31196149	+	MLT1A0	LTR	ERVL-MaLR	1	365	0	7
1430	1804	164	112	13	chr11	110867028	110867405	-24219217	+	LTR32	LTR	ERVL	39	457	0	7
1433	1773	181	39	52	chr11	111204283	111204651	-23881971	+	MLT1A0	LTR	ERVL-MaLR	1	363	-2	7
1447	1305	236	73	12	chr11	113012446	113012867	-22073755	-	MLT1C	LTR	ERVL-MaLR	-12	455	7	7
1525	1292	240	104	14	chr11	123251602	123252020	-11834602	+	MLT1C	LTR	ERVL-MaLR	4	463	-4	7
1566	1696	190	47	21	chr11	128675030	128675406	-6411216	+	MLT1B	LTR	ERVL-MaLR	1	386	-4	7
1574	235	287	144	29	chr11	129687313	129687417	-5399205	+	MLT1M	LTR	ERVL-MaLR	56	173	-499	7
710	2257	196	41	2	chr12	16453542	16453991	-116821318	-	MLT1C	LTR	ERVL-MaLR	0	467	1	8
738	1292	214	97	26	chr12	20084891	20085236	-113190073	-	MLT1A	LTR	ERVL-MaLR	-2	372	1	8
760	1461	206	47	55	chr12	23013623	23013838	-110261471	-	MLT1D	LTR	ERVL-MaLR	-266	239	32	8
815	3178	279	69	51	chr12	30150643	30151462	-103123847	+	ERV3-16A3_I-int	LTR	ERVL	4340	5178	-48	8
912	1563	229	56	41	chr12	42926815	42927275	-90348034	-	MLT1C	LTR	ERVL-MaLR	0	467	1	8
962	3406	98	13	50	chr12	49458951	49459339	-83815970	+	LTR71A	LTR	ERV1	1	384	-75	8
1002	1893	157	178	5	chr12	54689935	54690352	-78584957	+	MLT1D	LTR	ERVL-MaLR	1	505	0	8
1130	2257	137	41	19	chr12	71482234	71482613	-61792696	-	MLT1B	LTR	ERVL-MaLR	0	390	3	8
1143	1395	212	65	0	chr12	73161542	73161844	-60113465	+	MLT1C	LTR	ERVL-MaLR	1	323	-144	8
1216	2589	199	8	20	chr12	82836230	82836727	-50438582	+	MLT1D	LTR	ERVL-MaLR	15	505	0	8
1238	1271	236	33	0	chr12	85706899	85707192	-47568117	-	MLT1B	LTR	ERVL-MaLR	0	390	88	9
1241	494	294	81	54	chr12	86103169	86103617	-47171692	+	MLT1C	LTR	ERVL-MaLR	2	464	-3	9
1332	1795	232	26	65	chr12	98019460	98019986	-35255323	-	MLT1D	LTR	ERVL-MaLR	0	505	1	9
1346	1535	207	33	53	chr12	99800037	99800435	-33474874	+	MLT1B	LTR	ERVL-MaLR	1	390	0	9
1389	1514	273	150	43	chr12	105405680	105406654	-27868655	-	HERV16-int	LTR	ERVL	-3911	1085	3	9
1391	2163	199	77	9	chr12	105651349	105651784	-27623525	-	MLT1C	LTR	ERVL-MaLR	0	467	1	9
1391	2163	199	77	9	chr12	105651349	105651784	-27623525	-	MLT1C	LTR	ERVL-MaLR	0	467	1	9
1412	2353	182	22	13	chr12	108418095	108418551	-24856758	-	MLT1C	LTR	ERVL-MaLR	0	467	8	9
1412	2353	182	22	13	chr12	108418095	108418551	-24856758	-	MLT1C	LTR	ERVL-MaLR	0	467	8	9
1474	649	172	104	139	chr12	116549295	116549440	-16725869	-	MLT1B	LTR	ERVL-MaLR	-218	172	18	9
1483	1139	191	348	24	chr12	117708820	117709197	-15566112	-	MLT1D	LTR	ERVL-MaLR	-1	504	1	9
1483	1139	191	348	24	chr12	117708820	117709197	-15566112	-	MLT1D	LTR	ERVL-MaLR	-1	504	1	9
1483	1947	196	42	101	chr12	117802011	117802517	-15472792	-	MLT1D	LTR	ERVL-MaLR	-30	475	1	9
1500	1007	152	12	17	chr12	120002168	120002342	-13272967	-	MLT1B	LTR	ERVL-MaLR	-215	175	3	9
1538	932	215	49	40	chr12	124949549	124949921	-8325388	+	MLT1C	LTR	ERVL-MaLR	17	375	-15	9
1542	1835	194	84	12	chr12	125530491	125530909	-7744400	-	MLT1C	LTR	ERVL-MaLR	0	467	17	9
1545	2628	146	81	11	chr12	125927529	125927979	-7347330	+	MER66D	LTR	ERV1	1	484	0	9
1551	968	220	172	15	chr12	126738590	126738918	-6536391	-	MLT1B	LTR	ERVL-MaLR	0	390	1	9
1567	1645	171	84	19	chr12	128725855	128726176	-4549133	+	MLT1D	LTR	ERVL-MaLR	5	348	-157	9
1572	1650	214	35	19	chr12	129405082	129405449	-3869860	-	MLT1A	LTR	ERVL-MaLR	0	374	2	9
756	619	177	84	0	chr13	22494582	22494712	-91869616	+	MLT1D	LTR	ERVL-MaLR	63	204	-301	9
759	9273	108	58	38	chr13	22891255	22892771	-91471557	+	MER4-int	LTR	ERV1	5041	6598	0	9
768	660	198	40	23	chr13	23996767	23996938	-90367390	-	MLT1D	LTR	ERVL-MaLR	-198	307	134	9
776	1847	174	50	8	chr13	25043992	25044358	-89319970	+	MLT1B	LTR	ERVL-MaLR	1	382	-8	1
793	5552	136	27	9	chr13	27324849	27325752	-87038576	-	MER49	LTR	ERV1	-1	922	3	1
865	1753	92	13	0	chr13	36796143	36796372	-77567956	+	LTR71A	LTR	ERV1	171	402	-57	1
872	1232	223	75	52	chr13	37669884	37670249	-76694079	+	MLT1A	LTR	ERVL-MaLR	1	374	0	1
876	2073	172	44	0	chr13	38150517	38150890	-76213438	-	MLT1B	LTR	ERVL-MaLR	0	390	1	1
949	842	217	10	65	chr13	47799107	47799324	-66565004	+	MLT1C	LTR	ERVL-MaLR	1	205	-262	1
957	16332	176	61	46	chr13	48867526	48871312	-65493016	-	HERVH-int	LTR	ERV1	-2693	5020	1172	1
958	1338	319	22	79	chr13	48935198	48935826	-65428502	+	ERVL-E-int	LTR	ERVL	284	882	-4785	1
1011	1742	174	0	0	chr13	55871313	55871583	-58492745	-	LTR71A	LTR	ERV1	0	459	190	1
1011	1742	174	0	0	chr13	55871313	55871583	-58492745	-	LTR71A	LTR	ERV1	0	459	190	1
1011	3086	142	0	0	chr13	55879759	55880218	-58484110	-	LTR71A	LTR	ERV1	0	459	1	1
1011	3086	142	0	0	chr13	55879759	55880218	-58484110	-	LTR71A	LTR	ERV1	0	459	1	1
1023	2397	225	53	15	chr13	57465994	57466594	-56897734	+	MLT1E3	LTR	ERVL-MaLR	1	624	0	1
1057	1332	194	78	27	chr13	61940357	61940695	-52423633	-	MLT1A0	LTR	ERVL-MaLR	-4	361	5	1
1064	1900	185	47	8	chr13	62894939	62895305	-51469023	+	MLT1B	LTR	ERVL-MaLR	10	390	0	1
1101	1099	354	74	57	chr13	67657718	67658573	-46705755	+	ERVL-E-int	LTR	ERVL	565	1434	-4233	1
1125	1479	249	40	11	chr13	70821375	70821740	-43542588	-	MLT1D	LTR	ERVL-MaLR	-117	388	13	1
1138	1961	166	110	15	chr13	72551992	72552233	-41812095	-	MLT1C	LTR	ERVL-MaLR	-14	453	189	1
1224	1656	235	14	0	chr13	83801615	83801973	-30562355	+	MLT1A0	LTR	ERVL-MaLR	1	363	-2	1
1237	3169	103	9	19	chr13	85481584	85482048	-28882280	-	LTR71A	LTR	ERV1	0	459	1	1
1237	3169	103	9	19	chr13	85481584	85482048	-28882280	-	LTR71A	LTR	ERV1	0	459	1	1
1259	1551	226	36	61	chr13	88465496	88465891	-25898437	-	MLT1B	LTR	ERVL-MaLR	-5	385	1	1
1273	3231	117	2	2	chr13	90287065	90287518	-24076810	+	LTR71A	LTR	ERV1	7	459	0	1
1314	1632	197	58	12	chr13	95650456	95650785	-18713543	-	MLT1A1	LTR	ERVL-MaLR	-63	345	1	1
1327	1386	216	103	39	chr13	97336352	97336815	-17027513	+	MLT1D	LTR	ERVL-MaLR	8	503	-2	1
1332	2584	126	24	8	chr13	97919333	97919708	-16444620	+	THE1D	LTR	ERVL-MaLR	1	381	0	1
1396	809	182	41	0	chr13	106324159	106324324	-8040004	-	MLT1B	LTR	ERVL-MaLR	-217	173	2	1
1401	3814	189	45	45	chr13	107051755	107053185	-7311143	+	LTR49-int	LTR	ERV1	4835	6070	-688	1
1404	1965	207	50	61	chr13	107422603	107423112	-6941216	+	MLT1D	LTR	ERVL-MaLR	3	505	0	1
1437	552	269	50	117	chr13	111688957	111689214	-2675114	+	MLT1B	LTR	ERVL-MaLR	152	390	0	1
1437	552	269	50	117	chr13	111774228	111774485	-2589843	+	MLT1B	LTR	ERVL-MaLR	152	390	0	1
737	16503	160	19	14	chr14	19978755	19981775	-87061943	+	HERVIP10F-int	LTR	ERV1	4718	7784	-1	1
765	1356	184	134	34	chr14	23663160	23663487	-83380231	+	MLT1A	LTR	ERVL-MaLR	10	374	0	1
832	1769	176	82	6	chr14	32479614	32479951	-74563767	+	MLT1A0	LTR	ERVL-MaLR	1	365	0	1
876	1471	240	41	65	chr14	38249122	38249599	-68794119	+	MLT1C	LTR	ERVL-MaLR	1	465	-2	1
877	1708	180	85	9	chr14	38327771	38328108	-68715610	-	MLT1A0	LTR	ERVL-MaLR	0	365	1	1
892	1280	208	77	8	chr14	40240194	40240557	-66803161	-	MLT1B	LTR	ERVL-MaLR	0	390	1	1
897	1716	205	34	26	chr14	40974274	40974625	-66069093	-	MLT1A0	LTR	ERVL-MaLR	-11	354	1	1
918	1857	162	66	42	chr14	43673741	43674096	-63369622	+	THE1B	LTR	ERVL-MaLR	1	364	0	1
923	1442	242	61	34	chr14	44365077	44365525	-62678193	+	MLT1C	LTR	ERVL-MaLR	7	467	0	1
996	1690	191	24	62	chr14	53935780	53936165	-53107553	-	MLT1A	LTR	ERVL-MaLR	0	374	5	1
1088	1486	249	77	31	chr14	66042234	66042636	-41001082	-	MLT1D	LTR	ERVL-MaLR	0	505	81	1
1092	1377	229	110	26	chr14	66454022	66454444	-40589274	-	MLT1C	LTR	ERVL-MaLR	0	467	6	1
1124	1798	197	56	78	chr14	70769480	70769953	-36273765	-	MLT1C	LTR	ERVL-MaLR	-5	462	1	1
1134	1401	238	39	30	chr14	71983401	71983864	-35059854	-	MLT1C	LTR	ERVL-MaLR	0	467	1	1
1141	2039	147	36	41	chr14	72916364	72916647	-34127071	+	MLT1B	LTR	ERVL-MaLR	110	389	-1	1
1158	1490	180	104	191	chr14	75170964	75171281	-31872437	+	MLT1D	LTR	ERVL-MaLR	4	263	-242	1
1185	1406	211	97	26	chr14	78753930	78754275	-28289443	-	MER57E1	LTR	ERV1	0	372	1	1
1250	2096	144	27	22	chr14	87229681	87230049	-19813669	-	THE1C	LTR	ERVL-MaLR	-5	370	1	1
1270	2135	144	30	38	chr14	89888113	89888299	-17155419	+	MLT1A0	LTR	ERVL-MaLR	1	186	-179	1
1294	1813	175	90	0	chr14	92972212	92972567	-14071151	+	MLT1B	LTR	ERVL-MaLR	1	390	0	1
1304	1797	188	109	24	chr14	94353548	94353974	-12689744	-	MLT1C	LTR	ERVL-MaLR	0	467	1	1
1310	2519	201	124	2	chr14	95073938	95074510	-11969208	+	MLT1E1	LTR	ERVL-MaLR	3	654	0	1
1332	2292	188	83	9	chr14	97958567	97959034	-9084684	+	MLT1D	LTR	ERVL-MaLR	1	505	0	1
1339	1353	230	35	68	chr14	98896297	98896515	-8147203	-	MLT1A	LTR	ERVL-MaLR	-157	217	6	1
1340	1766	175	46	49	chr14	99071051	99071442	-7972276	+	MLT1B	LTR	ERVL-MaLR	1	390	0	1
1341	1520	251	31	50	chr14	99111558	99111956	-7931762	+	MLT1B	LTR	ERVL-MaLR	1	390	0	1
1390	664	204	70	23	chr14	105518193	105518421	-1525297	-	MLT1C	LTR	ERVL-MaLR	-246	259	1	1
737	1090	287	44	72	chr15	19932773	19933044	-82058145	-	MLT1D	LTR	ERVL-MaLR	-231	274	5	1
772	9367	192	52	84	chr15	24513895	24517177	-77474012	-	HERV35I-int	LTR	ERV1	-1822	5096	1897	1
772	9367	192	52	84	chr15	24513895	24517177	-77474012	-	HERV35I-int	LTR	ERV1	-1822	5096	1897	1
772	9367	192	52	84	chr15	24513895	24517177	-77474012	-	HERV35I-int	LTR	ERV1	-1822	5096	1897	1
902	42218	46	11	1	chr15	41587502	41592733	-60398456	+	HERVIP10F-int	LTR	ERV1	2457	7737	0	1
902	42218	46	11	1	chr15	41587502	41592733	-60398456	+	HERVIP10F-int	LTR	ERV1	2457	7737	0	1
920	2121	141	25	25	chr15	44031332	44031697	-57959492	-	MLT1A0	LTR	ERVL-MaLR	0	365	1	1
963	1437	220	23	56	chr15	49654764	49655120	-52336069	-	MLT1A	LTR	ERVL-MaLR	0	374	31	1
963	1437	220	23	56	chr15	49654764	49655120	-52336069	-	MLT1A	LTR	ERVL-MaLR	0	374	31	1
1025	1661	193	79	9	chr15	57759995	57760334	-44230855	-	MLT1B	LTR	ERVL-MaLR	0	390	26	1
1025	1661	193	79	9	chr15	57759995	57760334	-44230855	-	MLT1B	LTR	ERVL-MaLR	0	390	26	1
1056	2003	182	14	54	chr15	61753335	61753724	-40237465	-	MLT1A	LTR	ERVL-MaLR	-1	373	1	1
1056	2003	182	14	54	chr15	61753335	61753724	-40237465	-	MLT1A	LTR	ERVL-MaLR	-1	373	1	1
1064	1644	230	60	60	chr15	62894230	62894534	-39096655	-	MLT1C	LTR	ERVL-MaLR	0	467	167	1
1114	2143	153	26	40	chr15	69402615	69402784	-32588405	-	MLT1B	LTR	ERVL-MaLR	-216	174	1	1
1116	1377	290	55	13	chr15	69615000	69615472	-32375717	-	LTR33	LTR	ERVL	0	515	23	1
1120	1581	211	105	16	chr15	70158671	70159123	-31832066	+	MLT1D	LTR	ERVL-MaLR	9	505	0	1
1137	674	349	46	54	chr15	72404877	72405377	-29585812	+	LTR104_Mam	LTR	Gypsy	528	1023	-486	1
1147	2513	171	43	0	chr15	73725465	73725934	-28265255	+	MLT1D	LTR	ERVL-MaLR	1	490	-15	1
1147	2513	171	43	0	chr15	73725465	73725934	-28265255	+	MLT1D	LTR	ERVL-MaLR	1	490	-15	1
1165	570	164	60	9	chr15	76079396	76079507	-25911682	-	MLT1D	LTR	ERVL-MaLR	-287	180	64	1
1182	1858	177	39	83	chr15	78328858	78329265	-23661924	-	MLT1B	LTR	ERVL-MaLR	-2	388	1	1
1208	1964	181	38	67	chr15	81722024	81722426	-20268763	+	MLT1B	LTR	ERVL-MaLR	1	390	0	1
1222	2239	197	80	19	chr15	83597011	83597483	-18393706	-	MLT1D	LTR	ERVL-MaLR	0	505	3	1
1224	2083	149	78	13	chr15	83762370	83762751	-18228438	-	MLT1A1	LTR	ERVL-MaLR	0	408	1	1
1240	798	225	27	17	chr15	85930221	85930402	-16060787	+	MLT1A	LTR	ERVL-MaLR	1	183	-191	1
1249	724	224	118	145	chr15	87073104	87073441	-14917748	-	MLT1A	LTR	ERVL-MaLR	-35	339	6	1
1293	1304	152	202	12	chr15	92914710	92915111	-9076078	-	LTR54B	LTR	ERV1	-2	496	1	1
1299	1984	153	13	67	chr15	93646944	93647234	-8343955	-	MLT1B	LTR	ERVL-MaLR	-112	278	8	1
1300	1398	221	36	57	chr15	93763120	93763489	-8227700	-	MLT1A	LTR	ERVL-MaLR	0	374	14	1
1303	3344	84	39	0	chr15	94203274	94203715	-7787474	+	LTR71A	LTR	ERV1	1	459	0	1
1330	1546	213	26	40	chr15	97765622	97766018	-4225171	+	MLT1B	LTR	ERVL-MaLR	1	390	0	1
1347	1391	208	33	49	chr15	99929302	99929703	-2061486	+	MLT1D	LTR	ERVL-MaLR	112	487	-18	1
1353	1679	201	129	18	chr15	100729390	100729830	-1261359	+	MLT1D	LTR	ERVL-MaLR	8	503	-2	1
629	1820	191	18	103	chr16	5769179	5769358	-84568987	+	MLT1B	LTR	ERVL-MaLR	1	169	-221	1
658	1664	251	52	9	chr16	9651097	9651536	-80686809	+	MLT1C	LTR	ERVL-MaLR	8	466	-1	1
661	1100	200	20	57	chr16	10000023	10000288	-80338057	-	MLT1D	LTR	ERVL-MaLR	-250	255	1	1
663	936	224	17	44	chr16	10231728	10231825	-80106520	-	MLT1A	LTR	ERVL-MaLR	-209	165	72	1
739	1461	215	142	39	chr16	20252386	20252827	-70085518	-	MLT1D	LTR	ERVL-MaLR	-4	501	8	1
816	1782	225	88	19	chr16	30350723	30351189	-59987156	-	MLT1D	LTR	ERVL-MaLR	-1	504	4	1
1038	1856	209	35	16	chr16	59427041	59427429	-30910916	-	MSTD	LTR	ERVL-MaLR	0	396	1	1
1045	1497	206	0	79	chr16	60333279	60333505	-30004840	-	MLT1A0	LTR	ERVL-MaLR	0	365	157	1
1127	1829	143	85	11	chr16	71087212	71087573	-19250772	-	MLT1B	LTR	ERVL-MaLR	0	390	1	1
1127	1829	143	85	11	chr16	71087212	71087573	-19250772	-	MLT1B	LTR	ERVL-MaLR	0	390	1	1
2368	26435	102	26	30	chr1	233725525	233729409	-15227013	-	MER61-int	LTR	ERV1	0	5217	1341	3
2452	11263	99	27	6	chr1	244819947	244821187	-4135235	+	MER41-int	LTR	ERV1	4677	5944	-2	3
2452	11263	99	27	6	chr1	244819947	244821187	-4135235	+	MER41-int	LTR	ERV1	4677	5944	-2	3
2476	5610	72	15	17	chr1	247904254	247905072	-1051350	-	Harlequin-int	LTR	ERV1	-5818	1078	263	3
2482	15135	110	45	41	chr1	248714845	248717595	-238827	+	MER4-int	LTR	ERV1	3837	6597	-1	3
586	11014	76	14	1	chr2	143341	144756	-242048773	-	PABL_A-int	LTR	ERV1	0	5015	3583	1
649	1224	198	136	91	chr2	8403056	8403461	-233790068	+	MSTA	LTR	ERVL-MaLR	3	428	0	1
653	2869	135	26	0	chr2	8927832	8928246	-233265283	-	MSTA	LTR	ERVL-MaLR	-3	425	1	1
664	2162	150	110	0	chr2	10375893	10376272	-231817257	+	MSTB	LTR	ERVL-MaLR	1	426	0	1
710	1741	207	50	12	chr2	16475536	16475937	-225717592	-	MSTB	LTR	ERVL-MaLR	-2	424	8	1
817	4964	95	13	21	chr2	30516723	30517421	-211676108	+	HERVIP10FH-int	LTR	ERV1	16	707	-7919	1
817	4964	95	13	21	chr2	30516723	30517421	-211676108	+	HERVIP10FH-int	LTR	ERV1	16	707	-7919	1
819	2301	141	68	64	chr2	30681070	30681494	-211512035	-	MSTB	LTR	ERVL-MaLR	0	426	1	1
841	27111	124	55	54	chr2	33611700	33616900	-208576629	+	HUERS-P1-int	LTR	ERV1	1	4993	-953	1
841	10742	126	37	20	chr2	33664460	33666453	-208527076	+	MER61-int	LTR	ERV1	2244	3968	-1249	1
982	8968	116	36	12	chr2	52129537	52130983	-190062546	+	MER41-int	LTR	ERV1	3881	5361	-585	1
982	8968	116	36	12	chr2	52129537	52130983	-190062546	+	MER41-int	LTR	ERV1	3881	5361	-585	1
1185	20564	108	26	23	chr2	78673143	78676690	-163516839	-	MER61-int	LTR	ERV1	-1139	6066	1508	2
1185	20564	108	26	23	chr2	78673143	78676690	-163516839	-	MER61-int	LTR	ERV1	-1139	6066	1508	2
1211	7364	103	65	2	chr2	82130382	82132067	-160061462	+	MER41-int	LTR	ERV1	4120	5910	-36	2
1221	2375	277	45	66	chr2	83463639	83464695	-158728834	+	MER89-int	LTR	ERV1	403	1412	-5389	2
1229	11858	98	49	24	chr2	84465520	84467014	-157726515	-	MER41-int	LTR	ERV1	-250	5696	4151	2
1261	8626	112	25	20	chr2	88684075	88685017	-153508512	+	MER50-int	LTR	ERV1	4926	5875	-1330	2
1261	17300	98	45	19	chr2	88717674	88720362	-153473167	-	MER4-int	LTR	ERV1	-2	6596	3836	2
1261	17300	98	45	19	chr2	88717674	88720362	-153473167	-	MER4-int	LTR	ERV1	-2	6596	3836	2
1354	2772	188	29	11	chr2	100844897	100845446	-141348083	-	MER89	LTR	ERV1	0	559	1	2
1374	1803	92	37	96	chr2	103476370	103476683	-138716846	-	HUERS-P1-int	LTR	ERV1	-698	5248	4955	2
1374	1803	92	37	96	chr2	103476370	103476683	-138716846	-	HUERS-P1-int	LTR	ERV1	-698	5248	4955	2
1429	6567	133	57	68	chr2	110726966	110728212	-131465317	-	Tigger3b	DNA	TcMar-Tigger	0	1231	1	2
1429	6567	133	57	68	chr2	110726966	110728212	-131465317	-	Tigger3b	DNA	TcMar-Tigger	0	1231	1	2
1519	1200	297	62	31	chr2	122475857	122476281	-119717248	-	LTR16	LTR	ERVL	0	438	1	2
1538	18658	119	18	15	chr2	124991428	124993960	-117199569	+	MER41-int	LTR	ERV1	3404	5946	0	2
1541	1857	150	145	8	chr2	125349295	125349664	-116843865	-	MSTA	LTR	ERVL-MaLR	0	428	1	2
1551	1886	132	168	6	chr2	126644760	126645118	-115548411	+	MSTA	LTR	ERVL-MaLR	1	428	0	2
1551	1886	132	168	6	chr2	126644760	126645118	-115548411	+	MSTA	LTR	ERVL-MaLR	1	428	0	2
1568	1581	267	113	34	chr2	128921793	128922348	-113271181	+	MER77	LTR	ERVL	1	604	0	2
1588	10109	123	63	23	chr2	131561850	131563804	-110629725	+	MER4-int	LTR	ERV1	4494	6597	-1	2
1659	15927	120	45	23	chr2	140875035	140877490	-101316039	+	MER4-int	LTR	ERV1	4071	6596	-2	2
1671	3033	212	50	8	chr2	142410493	142411196	-99782333	+	MER50	LTR	ERV1	1	734	0	2
1674	2056	137	128	5	chr2	142753192	142753567	-99439962	+	MSTA	LTR	ERVL-MaLR	1	428	0	2
1806	16417	122	83	51	chr2	160066499	160069590	-82123939	-	MER4-int	LTR	ERV1	-30	6568	2474	2
1806	2184	157	77	15	chr2	160093919	160094320	-82099209	+	MSTA	LTR	ERVL-MaLR	1	428	0	2
1814	1486	218	24	104	chr2	161124193	161124607	-81068922	+	MLT1B	LTR	ERVL-MaLR	1	380	-10	2
1821	1969	240	37	35	chr2	162107385	162107903	-80085626	-	LTR40a	LTR	ERVL	0	519	1	2
1824	18356	172	21	24	chr2	162492892	162496239	-79697290	+	LTR25-int	LTR	ERV1	3850	7185	-3	2
1863	1478	273	78	43	chr2	167545609	167545804	-74647725	-	MER77B	LTR	ERVL	-173	765	520	2
1903	1245	122	36	9	chr2	172868729	172868944	-69324585	-	MSTB	LTR	ERVL-MaLR	0	426	206	2
1907	17796	235	88	87	chr2	173291778	173293993	-68899536	-	LTR25-int	LTR	ERV1	-2	7186	4961	2
1911	415	298	162	47	chr2	173826260	173826574	-68366955	+	LTR85a	LTR	Gypsy?	365	702	0	2
1921	1097	145	164	8	chr2	175153298	175153535	-67039994	-	Tigger3c	DNA	TcMar-Tigger	-1	601	321	2
1960	22892	113	46	17	chr2	180337386	180340770	-61852759	+	MER61-int	LTR	ERV1	1655	4863	-354	2
2001	287	56	0	0	chr2	185629745	185629781	-56563748	+	MER61-int	LTR	ERV1	3267	3302	-1915	2
2001	193	128	130	21	chr2	185629781	185629829	-56563700	+	AmnSINE1	SINE	5S-Deu-L2	238	291	-284	2
2001	287	56	0	0	chr2	185629745	185629781	-56563748	+	MER61-int	LTR	ERV1	3267	3302	-1915	2
2001	193	128	130	21	chr2	185629781	185629829	-56563700	+	AmnSINE1	SINE	5S-Deu-L2	238	291	-284	2
2021	12581	100	18	11	chr2	188238420	188239729	-53953800	+	MER41-int	LTR	ERV1	4620	5940	-6	2
2029	2060	157	91	5	chr2	189304353	189304744	-52888785	-	MSTA	LTR	ERVL-MaLR	0	428	1	2
2039	19400	53	28	8	chr2	190609689	190612152	-51581377	-	PABL_A-int	LTR	ERV1	0	5015	2500	2
2115	12075	111	16	10	chr2	200552950	200555166	-41638363	-	MER41-int	LTR	ERV1	-1114	6091	4096	2
2173	5701	107	22	19	chr2	208194124	208194972	-33998557	+	HERV35I-int	LTR	ERV1	5652	6502	-416	2
2253	2066	137	110	95	chr2	218676400	218676643	-23516886	-	MSTA	LTR	ERVL-MaLR	0	428	198	2
2254	22837	80	25	15	chr2	218794239	218796311	-23397218	-	MER61-int	LTR	ERV1	0	5217	3091	2
2261	2404	154	30	12	chr2	219714034	219714454	-22479075	+	MSTA	LTR	ERVL-MaLR	1	428	0	2
2261	2404	154	30	12	chr2	219714034	219714454	-22479075	+	MSTA	LTR	ERVL-MaLR	1	428	0	2
2281	13741	128	60	32	chr2	222413265	222416199	-19777330	+	MER4-int	LTR	ERV1	3881	8270	0	2
2294	18653	148	27	13	chr2	224104067	224107895	-18085634	-	ERVL-B4-int	LTR	ERVL	0	5714	1715	2
2322	2238	127	133	5	chr2	227673620	227673993	-14519536	+	MSTA	LTR	ERVL-MaLR	1	428	0	2
2328	15688	116	45	17	chr2	228535639	228538278	-13655251	+	MER4-int	LTR	ERV1	3881	6596	-2	2
2429	9035	112	37	41	chr2	241791234	241792001	-401528	+	MER4-int	LTR	ERV1	5431	6188	-410	2
2429	9035	112	37	41	chr2	241791234	241792001	-401528	+	MER4-int	LTR	ERV1	5431	6188	-410	2
2429	9035	112	37	41	chr2	241791234	241792001	-401528	+	MER4-int	LTR	ERV1	5431	6188	-410	2
610	1659	176	124	3	chr3	3335374	3335750	-194959809	+	MSTA	LTR	ERVL-MaLR	1	428	0	2
654	1424	221	88	39	chr3	9172402	9172525	-189123034	-	MLT1C	LTR	ERVL-MaLR	-343	124	2	2
692	15634	108	50	12	chr3	14024780	14027433	-184268126	-	MER4-int	LTR	ERV1	-5	6593	3837	2
744	11000	105	37	18	chr3	20962570	20963623	-177331936	+	MER4-int	LTR	ERV1	5522	6595	-3	2
754	2425	150	48	5	chr3	22231723	22232125	-176063434	+	MSTA	LTR	ERVL-MaLR	1	420	-8	2
829	30808	103	26	20	chr3	32055483	32056738	-166238821	+	MER41-int	LTR	ERV1	4668	5944	-2	2
854	5871	208	78	73	chr3	35324435	35325609	-162969950	-	HERV35I-int	LTR	ERV1	-795	6123	4745	2
926	17167	143	40	37	chr3	44768647	44773463	-153522096	-	MER61-int	LTR	ERV1	-2105	6015	193	2
926	17167	143	40	37	chr3	44768647	44773463	-153522096	-	MER61-int	LTR	ERV1	-2105	6015	193	2
968	2292	143	108	82	chr3	50309484	50309688	-147985871	+	MER4-int	LTR	ERV1	5027	5245	-1086	2
968	2292	143	108	82	chr3	50309484	50309688	-147985871	+	MER4-int	LTR	ERV1	5027	5245	-1086	2
980	20903	75	19	16	chr3	51843009	51844039	-146451520	-	MER61-int	LTR	ERV1	-1873	3344	2317	2
982	10035	129	33	60	chr3	52165066	52166322	-146129237	+	MER4-int	LTR	ERV1	5347	6548	-50	2
1004	13101	125	50	32	chr3	54978288	54982534	-143313025	-	MER41-int	LTR	ERV1	-2	5944	1	2
1048	22516	87	29	12	chr3	60777880	60780751	-137514808	+	MER61-int	LTR	ERV1	2290	5217	0	2
1057	2276	126	43	0	chr3	61926190	61926564	-136368995	+	MSTA	LTR	ERVL-MaLR	1	391	-37	2
1193	32951	67	21	2	chr3	79773346	79777503	-118518056	+	HERVE_a-int	LTR	ERV1	3	4239	-3608	2
1249	23603	104	35	15	chr3	87142115	87145807	-111149752	+	MER61-int	LTR	ERV1	1655	5217	0	2
1312	20520	123	25	11	chr3	95409354	95412197	-102883362	+	MER61-int	LTR	ERV1	1961	4822	-395	2
1324	9820	110	25	12	chr3	96886876	96888484	-101407075	-	L1PB1	LINE	L1	-4868	1995	357	2
1352	15629	116	32	33	chr3	100582416	100585873	-97709686	-	MER41-int	LTR	ERV1	-644	5302	2061	2
1352	15629	116	32	33	chr3	100582416	100585873	-97709686	-	MER41-int	LTR	ERV1	-644	5302	2061	2
1391	562	325	72	29	chr3	105718804	105719149	-92576410	+	MamRep605	LTR?	LTR?	435	795	-54	2
1417	2104	144	124	8	chr3	109157820	109158198	-89137361	-	MSTA	LTR	ERVL-MaLR	0	428	1	2
1417	2104	144	124	8	chr3	109157820	109158198	-89137361	-	MSTA	LTR	ERVL-MaLR	0	428	1	2
1417	2104	144	124	8	chr3	109157820	109158198	-89137361	-	MSTA	LTR	ERVL-MaLR	0	428	1	2
1456	11959	108	39	48	chr3	114259013	114261887	-84033672	-	MER41-int	LTR	ERV1	-2	5944	1092	2
1477	21728	152	101	57	chr3	117027735	117033411	-81262148	+	MER41-int	LTR	ERV1	1	5944	-2	2
1493	4107	115	35	3	chr3	119120340	119120985	-79174574	-	LTR9C	LTR	ERV1	0	666	1	2
1500	14542	74	38	12	chr3	119987333	119989361	-78306198	+	LTR19-int	LTR	ERV1	2761	4842	-744	2
1504	9960	122	18	16	chr3	120509478	120511327	-77784232	+	MER50-int	LTR	ERV1	4702	7197	-8	2
1504	9960	122	18	16	chr3	120509478	120511327	-77784232	+	MER50-int	LTR	ERV1	4702	7197	-8	2
1547	10352	171	27	32	chr3	126167923	126170497	-72125062	+	LTR25-int	LTR	ERV1	4463	6894	-524	2
1549	1850	179	55	141	chr3	126363216	126363691	-71931868	-	MSTB1	LTR	ERVL-MaLR	0	432	1	2
1549	1850	179	55	141	chr3	126363216	126363691	-71931868	-	MSTB1	LTR	ERVL-MaLR	0	432	1	2
1556	11385	122	66	25	chr3	127398416	127401714	-70893845	-	MER41-int	LTR	ERV1	-2	5944	1396	2
1577	60161	67	4	6	chr3	130141408	130149230	-68146329	-	HERVE-int	LTR	ERV1	-2	7811	3	2
1577	60161	67	4	6	chr3	130141408	130149230	-68146329	-	HERVE-int	LTR	ERV1	-2	7811	3	2
1656	2077	179	3	0	chr3	140503246	140503593	-57791966	+	Tigger3a	DNA	TcMar-Tigger	1	348	0	2
1659	1469	310	62	78	chr3	140850870	140851651	-57443908	-	MamGypLTR3a	LTR	Gypsy	-157	824	57	2
1672	1808	258	54	30	chr3	142487937	142488428	-55807131	+	LTR33	LTR	ERVL	6	508	-7	2
1734	15311	92	56	18	chr3	150691673	150694240	-47601319	+	MER4-int	LTR	ERV1	3918	6585	-13	2
1772	14457	129	46	30	chr3	155615917	155618650	-42676909	+	HERV35I-int	LTR	ERV1	3783	6561	-357	2
1783	2688	121	30	2	chr3	157042888	157043304	-41252255	+	MSTA	LTR	ERVL-MaLR	1	428	0	2
1814	19316	128	34	36	chr3	161147788	161148921	-37146638	+	MER41-int	LTR	ERV1	4782	5943	-3	2
1814	19316	128	34	36	chr3	161147788	161148921	-37146638	+	MER41-int	LTR	ERV1	4782	5943	-3	2
1814	2032	136	140	11	chr3	161152082	161152454	-37143105	-	MSTA	LTR	ERVL-MaLR	0	428	1	2
1826	21393	112	11	11	chr3	162667459	162670056	-35625503	+	MER61-int	LTR	ERV1	2170	4825	-392	2
1826	21393	112	11	11	chr3	162667459	162670056	-35625503	+	MER61-int	LTR	ERV1	2170	4825	-392	2
1839	15174	123	51	18	chr3	164466837	164469504	-33826055	+	MER4-int	LTR	ERV1	3837	6597	-1	2
1884	3913	130	43	20	chr3	170318916	170319486	-27976073	-	HUERS-P1-int	LTR	ERV1	-5133	813	129	2
1884	3913	130	43	20	chr3	170318916	170319486	-27976073	-	HUERS-P1-int	LTR	ERV1	-5133	813	129	2
1886	2358	118	110	16	chr3	170625365	170625752	-27669807	+	MSTA	LTR	ERVL-MaLR	1	428	0	2
1886	2358	118	110	16	chr3	170625365	170625752	-27669807	+	MSTA	LTR	ERVL-MaLR	1	428	0	2
1960	10125	121	21	12	chr3	180228973	180231217	-18064342	+	MER61-int	LTR	ERV1	959	3572	-1645	2
1965	17480	84	39	24	chr3	180897343	180897940	-17397619	+	MER61-int	LTR	ERV1	2971	3572	-1645	2
2031	3364	218	51	146	chr3	189554302	189555602	-8739957	-	MER52A	LTR	ERV1	-560	1195	46	2
2071	259	299	313	0	chr3	194775398	194775615	-3519944	+	LTR33	LTR	ERVL	55	344	-171	2
654	62788	72	1	5	chr4	9097916	9105755	-181108800	+	HERVE-int	LTR	ERV1	3	7812	-1	2
654	62788	72	1	5	chr4	9097916	9105755	-181108800	+	HERVE-int	LTR	ERV1	3	7812	-1	2
679	8070	148	75	56	chr4	12424600	12425702	-177788853	+	MER4-int	LTR	ERV1	5203	6357	-241	2
692	820	193	69	50	chr4	14135250	14135496	-176079059	-	MLT1C	LTR	ERVL-MaLR	-133	257	7	2
729	952	157	80	0	chr4	18908564	18908736	-171305819	+	MSTA	LTR	ERVL-MaLR	234	420	-8	2
764	11038	137	13	24	chr4	23573167	23575234	-166639321	-	MER61-int	LTR	ERV1	-2481	5056	2231	2
764	11038	137	13	24	chr4	23573167	23575234	-166639321	-	MER61-int	LTR	ERV1	-2481	5056	2231	2
913	15411	108	52	35	chr4	43076265	43078427	-147136128	-	MER4-int	LTR	ERV1	-1	6597	4388	2
918	1919	179	87	18	chr4	43706336	43706734	-146507821	-	MSTA	LTR	ERVL-MaLR	0	428	1	2
918	1919	179	87	18	chr4	43706336	43706734	-146507821	-	MSTA	LTR	ERVL-MaLR	0	428	1	2
926	11476	160	45	43	chr4	44774040	44777754	-145436801	+	MER50-int	LTR	ERV1	2402	7197	-8	2
941	3629	198	72	9	chr4	46767861	46768614	-143445941	-	LTR1E	LTR	ERV1	0	804	1	2
951	15753	105	34	32	chr4	48005415	48006630	-142207925	-	MER4-int	LTR	ERV1	-637	5961	4728	2
958	1042	260	87	40	chr4	48941844	48942249	-141272306	-	LTR16	LTR	ERVL	0	438	13	2
1042	13437	173	36	31	chr4	59995383	59999264	-130215291	-	MER41-int	LTR	ERV1	-1	6495	632	2
1042	13437	173	36	31	chr4	59995383	59999264	-130215291	-	MER41-int	LTR	ERV1	-1	6495	632	2
1048	300	255	125	67	chr4	60716410	60716620	-129497935	-	MER34B	LTR	ERV1	-3	562	339	2
1080	20030	94	34	15	chr4	64954428	64957440	-125257115	+	MER61-int	LTR	ERV1	1320	4387	-830	2
1105	17059	107	21	20	chr4	68262837	68265040	-121949515	+	MER41-int	LTR	ERV1	3723	5946	0	2
1108	13829	114	54	15	chr4	68556438	68558753	-121655802	+	MER4-int	LTR	ERV1	4173	6584	-14	2
1108	13829	114	54	15	chr4	68556438	68558753	-121655802	+	MER4-int	LTR	ERV1	4173	6584	-14	2
1108	13646	118	54	13	chr4	68658845	68661156	-121553399	+	MER4-int	LTR	ERV1	4173	6584	-14	2
1108	13646	118	54	13	chr4	68658845	68661156	-121553399	+	MER4-int	LTR	ERV1	4173	6584	-14	2
1117	11454	129	31	16	chr4	69770677	69772316	-120442239	+	MER41-int	LTR	ERV1	1977	5023	-923	2
1118	15474	118	50	20	chr4	69870433	69872814	-120341741	+	MER4-int	LTR	ERV1	4136	6596	-2	2
1150	7866	181	53	38	chr4	74063119	74064949	-116149606	+	MER4-int	LTR	ERV1	4741	6598	0	2
1152	36692	93	38	25	chr4	74434413	74439303	-115775252	-	HERV4_I-int	LTR	ERV1	-410	6129	1172	2
1160	7451	86	34	2	chr4	75374129	75375217	-114839338	+	MER41-int	LTR	ERV1	4821	5944	-2	2
1225	24755	92	31	14	chr4	83990298	83994056	-106220499	+	MER61-int	LTR	ERV1	1396	5217	0	2
1225	24755	92	31	14	chr4	83990298	83994056	-106220499	+	MER61-int	LTR	ERV1	1396	5217	0	2
1251	11901	101	35	18	chr4	87366156	87368035	-102846520	+	MER41-int	LTR	ERV1	2064	5758	-188	2
1333	26999	142	26	51	chr4	98161596	98163015	-92051540	+	HUERS-P1-int	LTR	ERV1	3726	5628	-635	2
1333	26999	142	26	51	chr4	98161596	98163015	-92051540	+	HUERS-P1-int	LTR	ERV1	3726	5628	-635	2
1339	18892	100	24	12	chr4	98844949	98847808	-91366747	-	MER41-int	LTR	ERV1	-3	5943	3050	2
1378	14810	119	48	35	chr4	103951422	103953321	-86261234	+	MER4-int	LTR	ERV1	4700	8270	0	2
1458	14964	124	57	22	chr4	114548686	114551369	-75663186	-	MER4-int	LTR	ERV1	-2	6596	3815	2
1466	15611	108	51	49	chr4	115544514	115546367	-74668188	-	MER4-int	LTR	ERV1	0	6598	4754	2
1551	4169	110	33	0	chr4	126714906	126715550	-63499005	-	LTR9C	LTR	ERV1	0	666	1	2
1576	4629	241	36	12	chr4	129900457	129901613	-60312942	+	MER83B-int	LTR	ERV1	4	1825	-7094	2
1584	9700	135	33	22	chr4	130997605	130999757	-59214798	+	MER61-int	LTR	ERV1	1413	4537	-478	2
1602	3941	113	23	38	chr4	133376692	133377161	-56837394	-	LTR9B	LTR	ERV1	-1	643	185	2
1602	3941	113	23	38	chr4	133376692	133377161	-56837394	-	LTR9B	LTR	ERV1	-1	643	185	2
1633	10889	135	42	31	chr4	137464930	137468996	-52745559	+	MER41-int	LTR	ERV1	1	5946	0	2
1673	19859	130	44	22	chr4	142657102	142659117	-47555438	+	MER61-int	LTR	ERV1	2219	5865	-1340	2
1676	11415	114	95	88	chr4	143093224	143095736	-47118819	+	MER4-int	LTR	ERV1	1798	5854	-744	2
1686	7684	185	33	3	chr4	144321677	144324761	-45889794	+	L1PA15	LINE	L1	496	3657	-3109	2
1774	15735	96	52	33	chr4	155847749	155850113	-34364442	+	MER4-int	LTR	ERV1	4158	6584	-14	3
1774	15735	96	52	33	chr4	155847749	155850113	-34364442	+	MER4-int	LTR	ERV1	4158	6584	-14	3
1786	8267	126	21	11	chr4	157523587	157525146	-32689409	-	MER61-int	LTR	ERV1	-1226	3991	2675	3
1786	8267	126	21	11	chr4	157523587	157525146	-32689409	-	MER61-int	LTR	ERV1	-1226	3991	2675	3
1786	1680	164	147	14	chr4	157535811	157535995	-32678560	+	MSTA	LTR	ERVL-MaLR	218	427	-1	3
1809	10586	114	56	20	chr4	160491508	160493238	-29721317	+	MER41-int	LTR	ERV1	4148	5943	-3	3
1847	9512	116	20	11	chr4	165470723	165472552	-24742003	-	MER50-int	LTR	ERV1	-8	7197	4713	3
1848	416	288	0	48	chr4	165616221	165616367	-24598188	+	MLT1E1A	LTR	ERVL-MaLR	1	139	-515	3
1853	24505	99	44	18	chr4	166199574	166203133	-24011422	+	MER61-int	LTR	ERV1	1560	5212	-5	3
1856	1845	191	82	13	chr4	166680204	166680602	-23533953	+	MSTA	LTR	ERVL-MaLR	1	428	0	3
1896	6968	116	26	8	chr4	171961162	171962228	-18252327	+	MER41-int	LTR	ERV1	4861	5946	0	3
1907	20701	123	35	24	chr4	173283657	173287132	-16927423	-	LTR25-int	LTR	ERV1	-941	6247	2729	3
1917	4725	88	18	3	chr4	174611634	174612297	-15602258	+	MER41-int	LTR	ERV1	4386	5058	-888	3
1949	1219	292	81	35	chr4	178804923	178805247	-11409308	-	MER34-int	LTR	ERV1	-6094	707	382	3
1956	13020	121	37	18	chr4	179774650	179778102	-10436453	+	PABL_A-int	LTR	ERV1	2186	5943	-3	3
1960	2424	159	28	5	chr4	180298667	180299083	-9915472	+	MSTA	LTR	ERVL-MaLR	3	428	0	3
1975	13240	137	46	35	chr4	182263932	182268471	-7946084	+	HUERS-P1-int	LTR	ERV1	1052	5945	-1	3
1998	16693	46	6	2	chr4	185325557	185327568	-4886987	-	LTR19-int	LTR	ERV1	-1220	4366	2345	3
628	26128	113	35	18	chr5	5694823	5699366	-175838893	+	MER61-int	LTR	ERV1	1	5216	-1	3
634	420	312	127	17	chr5	6536684	6537046	-175001213	-	LTR84a	LTR	ERVL	-1	756	349	3
655	21206	91	18	21	chr5	9271588	9277970	-172260289	+	L1PA7	LINE	L1	5	6468	-1	3
737	1959	157	122	8	chr5	20019377	20019756	-161518503	+	MSTA	LTR	ERVL-MaLR	1	428	0	3
743	1801	157	14	3	chr5	20796294	20796582	-160741677	+	MER50-int	LTR	ERV1	7	297	-6908	3
763	330	296	39	60	chr5	23338047	23338180	-158200079	+	MLT1J2	LTR	ERVL-MaLR	273	402	-46	3
766	4576	142	53	45	chr5	23825254	23825962	-157712297	-	Tigger3b	DNA	TcMar-Tigger	-228	1003	303	3
767	12972	95	26	13	chr5	23865227	23867155	-157671104	+	MER61-int	LTR	ERV1	1391	3343	-1874	3
847	1774	139	14	3	chr5	34407341	34407629	-147130630	-	MER50-int	LTR	ERV1	-6908	297	7	3
849	2233	151	72	17	chr5	34610113	34610517	-146927742	+	MSTA	LTR	ERVL-MaLR	1	428	0	3
980	15857	117	33	27	chr5	51777527	51779982	-129758277	-	MER41-int	LTR	ERV1	-159	5787	3300	3
1092	15254	106	55	15	chr5	66466837	66469187	-115069072	-	MER4-int	LTR	ERV1	-301	6297	3843	3
1094	346	310	26	0	chr5	66764296	66764409	-114773850	-	MLT1H2	LTR	ERVL-MaLR	-294	195	80	3
1099	2914	118	9	9	chr5	67422204	67422632	-114115627	-	MSTA	LTR	ERVL-MaLR	0	428	1	3
1119	2028	145	98	10	chr5	70053101	70053491	-111484768	-	MSTA	LTR	ERVL-MaLR	0	428	1	3
1126	2074	145	98	10	chr5	70928525	70928915	-110609344	-	MSTA	LTR	ERVL-MaLR	0	428	1	3
1159	12321	102	82	24	chr5	75296709	75299182	-106239077	+	MER4-int	LTR	ERV1	3969	6596	-2	3
1224	21262	170	75	67	chr5	83771604	83772489	-97765770	+	HERV35I-int	LTR	ERV1	5176	6043	-875	3
1224	21262	170	75	67	chr5	83771604	83772489	-97765770	+	HERV35I-int	LTR	ERV1	5176	6043	-875	3
1302	12614	108	19	9	chr5	94042604	94044576	-87493683	+	MER41-int	LTR	ERV1	2282	5944	-2	3
1302	12614	108	19	9	chr5	94042604	94044576	-87493683	+	MER41-int	LTR	ERV1	2282	5944	-2	3
1339	10302	192	67	62	chr5	98840794	98842787	-82695472	-	LTR25-int	LTR	ERV1	-789	6399	4153	3
1339	10302	192	67	62	chr5	98840794	98842787	-82695472	-	LTR25-int	LTR	ERV1	-789	6399	4153	3
1339	10302	192	67	62	chr5	98840794	98842787	-82695472	-	LTR25-int	LTR	ERV1	-789	6399	4153	3
1352	17228	102	15	10	chr5	100639366	100642138	-80896121	+	MER61-int	LTR	ERV1	2170	5216	-1	3
1366	1982	150	124	8	chr5	102479046	102479422	-79058837	+	MSTA	LTR	ERVL-MaLR	3	428	0	3
1430	14281	152	47	35	chr5	110827827	110830331	-70707928	+	MER41-int	LTR	ERV1	3476	7187	-1	3
1430	14281	152	47	35	chr5	110827827	110830331	-70707928	+	MER41-int	LTR	ERV1	3476	7187	-1	3
1436	19779	86	35	24	chr5	111663371	111666231	-69872028	-	MER61-int	LTR	ERV1	0	5217	2325	3
1460	18325	56	11	4	chr5	114723251	114725642	-66812617	+	LTR19-int	LTR	ERV1	1975	4381	-1205	3
1504	644	308	129	40	chr5	120510973	120511396	-61026863	-	MamRep605	LTR?	LTR?	-127	722	257	3
1538	15530	103	26	27	chr5	124963879	124966685	-56571574	+	MER61-int	LTR	ERV1	2216	6072	-1133	3
1546	3383	115	110	10	chr5	126057187	126057664	-55480595	-	LTR9C	LTR	ERV1	-138	528	2	3
1591	2228	135	16	165	chr5	131902453	131902655	-49635604	+	MSTA	LTR	ERVL-MaLR	289	428	0	3
1692	2285	158	25	18	chr5	145187448	145187848	-36350411	+	MSTA	LTR	ERVL-MaLR	1	403	-25	3
1692	2285	158	25	18	chr5	145187448	145187848	-36350411	+	MSTA	LTR	ERVL-MaLR	1	403	-25	3
1704	2391	149	47	2	chr5	146781859	146782268	-34755991	+	MSTA	LTR	ERVL-MaLR	1	428	0	3
1714	18675	112	29	14	chr5	148002691	148006327	-33531932	+	MER61-int	LTR	ERV1	2170	6072	-1133	3
1787	10114	157	28	37	chr5	157655745	157658510	-23879749	+	PABL_A-int	LTR	ERV1	1429	4589	-426	3
1819	479	307	17	28	chr5	161805333	161805514	-19732745	+	MLT1I	LTR	ERVL-MaLR	233	411	0	3
1834	2646	123	30	26	chr5	163769365	163769791	-17768468	-	MSTA	LTR	ERVL-MaLR	0	428	1	3
1919	2826	110	0	6	chr5	174974438	174974804	-6563455	-	THE1B	LTR	ERVL-MaLR	0	364	1	3
1922	2389	161	39	24	chr5	175337735	175338160	-6200099	+	MSTB1	LTR	ERVL-MaLR	1	432	0	3
1931	12916	101	56	28	chr5	176424872	176425470	-5112789	-	MER4-int	LTR	ERV1	-455	6143	5524	3
1951	11034	112	14	1	chr5	179053595	179055098	-2483161	-	HERVE_a-int	LTR	ERV1	-4457	3390	1868	3
1965	15867	171	27	37	chr5	180977140	180978256	-560003	-	LTR25-int	LTR	ERV1	-533	6885	4718	3
1967	11291	117	48	12	chr5	181144736	181145977	-392282	+	MER4-int	LTR	ERV1	4625	5911	-687	3
602	1848	230	77	63	chr6	2235903	2236414	-168569565	+	LTR40a	LTR	ERVL	1	519	0	3
718	17381	98	42	24	chr6	17561589	17563471	-153242508	-	MER4-int	LTR	ERV1	-5	6593	4667	3
773	16460	99	54	35	chr6	24669545	24670953	-146135026	-	MER4-int	LTR	ERV1	0	6598	5118	3
776	15475	98	54	19	chr6	25133411	25136073	-145669906	+	MER4-int	LTR	ERV1	3837	6596	-2	3
823	20850	116	9	17	chr6	31322320	31324281	-139481698	+	L1PA13	LINE	L1	2717	4646	-2935	3
857	1850	135	149	11	chr6	35757781	35758149	-135047830	+	MSTA	LTR	ERVL-MaLR	1	428	0	3
857	1850	135	149	11	chr6	35757781	35758149	-135047830	+	MSTA	LTR	ERVL-MaLR	1	428	0	3
872	2132	276	52	6	chr6	37715342	37715877	-133090102	-	MER115	DNA	hAT-Tip100	-131	562	2	3
941	2708	122	26	2	chr6	46707363	46707781	-124098198	+	MSTA	LTR	ERVL-MaLR	1	428	0	3
988	2026	182	34	21	chr6	52926556	52927154	-117878825	+	HERV3-int	LTR	ERV1	7117	7811	-2	3
988	2026	182	34	21	chr6	52926556	52927154	-117878825	+	HERV3-int	LTR	ERV1	7117	7811	-2	3
1118	18602	92	22	9	chr6	69890862	69893451	-100912528	-	MER61-int	LTR	ERV1	0	5217	2596	3
1143	1367	145	227	65	chr6	73145736	73146090	-97659889	-	MSTA	LTR	ERVL-MaLR	0	428	1	3
1157	1833	217	55	23	chr6	74996170	74996577	-95809402	+	MLT1C	LTR	ERVL-MaLR	37	464	-3	3
1157	1833	217	55	23	chr6	74996170	74996577	-95809402	+	MLT1C	LTR	ERVL-MaLR	37	464	-3	3
1165	23896	84	20	12	chr6	76028832	76030638	-94775341	+	MER61-int	LTR	ERV1	3001	4814	-403	3
1189	7380	96	23	6	chr6	79257701	79258797	-91547182	-	MER41-int	LTR	ERV1	0	5946	4831	3
1197	7303	101	29	7	chr6	80291194	80292242	-90513737	-	MER41-int	LTR	ERV1	-2	5944	4873	3
1214	14212	165	29	17	chr6	82486380	82490066	-88315913	+	MER41-int	LTR	ERV1	2615	7187	-1	3
1240	12011	105	55	12	chr6	85897131	85899200	-84906779	+	MER4-int	LTR	ERV1	4433	6596	-2	3
1252	2123	169	42	5	chr6	87470293	87470703	-83335276	-	MSTB	LTR	ERVL-MaLR	0	426	1	3
1252	2123	169	42	5	chr6	87470293	87470703	-83335276	-	MSTB	LTR	ERVL-MaLR	0	426	1	3
1263	26333	81	47	22	chr6	88970251	88972398	-81833581	+	MER61-int	LTR	ERV1	3036	5208	-9	3
1293	16667	106	42	20	chr6	92831271	92832877	-77973102	+	MER4-int	LTR	ERV1	4953	6584	-14	3
1314	10907	167	62	51	chr6	95639370	95642000	-75163979	+	MER4-int	LTR	ERV1	3445	6104	-494	3
1340	2648	122	28	0	chr6	99071563	99071982	-71733997	-	Tigger3c	DNA	TcMar-Tigger	-1	601	171	3
1481	15954	102	37	16	chr6	117474724	117476016	-53329963	-	MER41-int	LTR	ERV1	-675	5271	3924	3
1482	11456	113	83	59	chr6	117626277	117628292	-53177687	+	MER4-int	LTR	ERV1	3837	5896	-702	3
1512	14329	100	26	10	chr6	121632251	121634431	-49171548	-	MER4-int	LTR	ERV1	0	6598	4383	3
1605	367	412	21	44	chr6	133728295	133728592	-37077387	+	LTR104_Mam	LTR	Gypsy	1166	1455	-54	3
1635	9918	129	49	23	chr6	137655296	137655833	-33150146	+	MER61-int	LTR	ERV1	3010	3600	-1617	3
1649	2321	140	131	5	chr6	139565503	139565877	-31240102	-	MSTA	LTR	ERVL-MaLR	0	428	1	3
1672	11561	108	25	11	chr6	142583414	142585274	-28220705	+	MER41-int	LTR	ERV1	2542	5943	-3	3
1672	11561	108	25	11	chr6	142583414	142585274	-28220705	+	MER41-int	LTR	ERV1	2542	5943	-3	3
1701	6017	182	47	3	chr6	146288808	146289966	-24516013	+	Tigger3b	DNA	TcMar-Tigger	21	1231	0	3
1755	16937	99	35	33	chr6	153354612	153356809	-17449170	+	MER61-int	LTR	ERV1	2591	4779	-438	3
1755	8659	141	44	38	chr6	153411727	153413768	-17392211	-	MER41-int	LTR	ERV1	-1112	6093	2617	3
1755	8659	141	44	38	chr6	153411727	153413768	-17392211	-	MER41-int	LTR	ERV1	-1112	6093	2617	3
1755	15710	101	54	22	chr6	153442929	153443916	-17362063	-	MER4-int	LTR	ERV1	-52	6546	5527	3
1772	11389	124	13	29	chr6	155610107	155611216	-15194763	-	MER61-int	LTR	ERV1	-1227	3990	3181	3
1805	5714	128	52	2	chr6	159928527	159929426	-10876553	+	Tigger3b	DNA	TcMar-Tigger	1	946	-285	3
1807	12938	93	23	18	chr6	160235501	160237665	-10568314	+	MER41-int	LTR	ERV1	2955	5945	-1	3
1807	12938	93	23	18	chr6	160235501	160237665	-10568314	+	MER41-int	LTR	ERV1	2955	5945	-1	3
1811	4938	159	37	41	chr6	160797832	160799280	-10006699	+	PABL_A-int	LTR	ERV1	3565	5652	-611	3
1811	4938	159	37	41	chr6	160797832	160799280	-10006699	+	PABL_A-int	LTR	ERV1	3565	5652	-611	3
1811	4938	159	37	41	chr6	160797832	160799280	-10006699	+	PABL_A-int	LTR	ERV1	3565	5652	-611	3
1812	12119	124	55	17	chr6	160888236	160889218	-9916761	+	MER4-int	LTR	ERV1	5517	6596	-2	3
1812	12119	124	55	17	chr6	160888236	160889218	-9916761	+	MER4-int	LTR	ERV1	5517	6596	-2	3
1822	2148	175	63	5	chr6	162186564	162186967	-8619012	+	MSTA	LTR	ERVL-MaLR	1	428	0	3
1822	2148	175	63	5	chr6	162186564	162186967	-8619012	+	MSTA	LTR	ERVL-MaLR	1	428	0	3
1886	5206	102	75	38	chr6	170587908	170589068	-216911	-	MER4-int	LTR	ERV1	-2	6596	5609	3
624	2312	109	98	35	chr7	5149350	5149694	-154196279	+	MSTA	LTR	ERVL-MaLR	56	428	0	3
629	2008	120	109	6	chr7	5820578	5820922	-153525051	-	MSTA	LTR	ERVL-MaLR	0	428	45	3
638	63417	68	1	6	chr7	6950904	6958745	-152387228	-	HERVE-int	LTR	ERV1	-1	7812	3	3
638	63417	68	1	6	chr7	6950904	6958745	-152387228	-	HERVE-int	LTR	ERV1	-1	7812	3	3
639	13297	91	72	53	chr7	7107683	7109396	-152236577	+	MER4-int	LTR	ERV1	3924	5766	-832	3
639	194	229	146	28	chr7	7109396	7109468	-152236505	+	AmnSINE1	SINE	5S-Deu-L2	238	319	-256	3
658	22942	110	36	21	chr7	9663905	9667603	-149678370	-	MER61-int	LTR	ERV1	0	5217	1655	3
670	24069	90	53	18	chr7	11193735	11197496	-148148477	+	MER61-int	LTR	ERV1	1322	5217	0	3
748	23394	82	23	12	chr7	21451805	21452783	-137893190	-	MER50-int	LTR	ERV1	-996	6209	5225	3
94	31061	113	57	43	chr7	22806025	22808138	-136537835	+	MER61-int	LTR	ERV1	3039	5214	-3	3
958	20474	108	39	11	chr7	48891715	48894871	-110451102	+	MER61-int	LTR	ERV1	1972	5217	0	3
972	1753	172	133	11	chr7	50725094	50725469	-108620504	+	MSTA	LTR	ERVL-MaLR	1	428	0	3
999	29655	94	41	28	chr7	54388053	54390198	-104955775	-	PABL_A-int	LTR	ERV1	0	5015	2849	3
1001	7398	98	61	18	chr7	54630788	54632047	-104713926	+	MER4-int	LTR	ERV1	5283	6598	0	3
1011	1623	128	217	23	chr7	55898339	55898682	-103447291	-	MSTA	LTR	ERVL-MaLR	0	428	1	3
1074	12769	110	45	18	chr7	64198766	64200003	-95145970	-	MER41-int	LTR	ERV1	-545	5401	4137	3
1078	28756	109	42	45	chr7	64747560	64748686	-94597287	-	PABL_A-int	LTR	ERV1	-695	4320	3215	3
1180	7044	120	48	11	chr7	78010154	78011277	-81334696	+	MER61-int	LTR	ERV1	2827	3993	-1224	3
1180	7044	120	48	11	chr7	78010154	78011277	-81334696	+	MER61-int	LTR	ERV1	2827	3993	-1224	3
1215	1908	142	112	62	chr7	82615439	82615844	-76730129	-	MSTA	LTR	ERVL-MaLR	0	428	1	3
1397	12003	90	22	21	chr7	106456035	106457146	-52888827	-	MER41-int	LTR	ERV1	0	5946	4825	3
1397	12003	90	22	21	chr7	106456035	106457146	-52888827	-	MER41-int	LTR	ERV1	0	5946	4825	3
1404	17870	93	23	9	chr7	107381037	107382427	-51963546	+	MER61-int	LTR	ERV1	2063	3567	-1650	3
1451	16418	101	61	23	chr7	113618727	113620889	-45725084	-	MER4-int	LTR	ERV1	-526	6072	3835	3
1493	13527	124	54	26	chr7	119054941	119057635	-40288338	-	MER4-int	LTR	ERV1	0	6598	3837	3
1551	23150	101	27	8	chr7	126669365	126673006	-32672967	+	MER61-int	LTR	ERV1	1655	5215	-2	3
1578	19849	103	34	25	chr7	130259767	130261816	-29084157	+	MER61-int	LTR	ERV1	3076	5174	-43	3
1578	19849	103	34	25	chr7	130259767	130261816	-29084157	+	MER61-int	LTR	ERV1	3076	5174	-43	3
1611	34842	189	6	5	chr7	134551541	134557372	-24788601	+	HERVS71-int	LTR	ERV1	3073	8909	-69	3
1611	34842	189	6	5	chr7	134551541	134557372	-24788601	+	HERVS71-int	LTR	ERV1	3073	8909	-69	3
1611	5193	91	3	26	chr7	134586200	134586902	-24759071	+	HERV17-int	LTR	ERV1	2	687	-7939	3
1645	13591	109	28	20	chr7	139002575	139005742	-20340231	+	MER41-int	LTR	ERV1	1421	5944	-2	3
1725	11660	163	12	31	chr7	149533337	149535145	-9810828	+	LTR25-int	LTR	ERV1	5406	7187	-1	3
1725	11660	163	12	31	chr7	149533337	149535145	-9810828	+	LTR25-int	LTR	ERV1	5406	7187	-1	3
1734	1491	143	16	0	chr7	150714443	150714681	-8631292	+	MSTA	LTR	ERVL-MaLR	187	428	0	3
631	2187	124	63	0	chr8	6149483	6149854	-138988782	-	MSTA	LTR	ERVL-MaLR	0	428	33	3
672	4849	134	53	31	chr8	11529852	11530756	-133607880	-	HERV35I-int	LTR	ERV1	-745	6173	5115	3
700	19490	97	29	28	chr8	15166547	15169263	-129969373	+	MER61-int	LTR	ERV1	2492	5217	0	3
760	20797	60	12	8	chr8	23052585	23055435	-122083201	+	PABL_A-int	LTR	ERV1	2093	5015	0	3
842	2412	113	24	6	chr8	33691731	33692095	-111446541	+	MSTA	LTR	ERVL-MaLR	1	371	-57	3
913	12211	147	60	47	chr8	43107981	43109534	-102029102	-	MER41-int	LTR	ERV1	-728	5218	3661	3
914	19312	77	35	28	chr8	43136888	43137949	-102000687	+	MER61-int	LTR	ERV1	3064	4088	-1129	3
917	32303	186	8	4	chr8	43551849	43560707	-101577929	-	HERVS71-int	LTR	ERV1	-69	8909	4	3
944	2102	207	127	17	chr8	47056962	47057551	-98081085	-	LTR9C	LTR	ERV1	0	666	4	3
986	12419	155	34	24	chr8	52602705	52604827	-92533809	+	MER41-int	LTR	ERV1	3832	7187	-1	3
992	18691	122	25	25	chr8	53348447	53352761	-91785875	-	PABL_A-int	LTR	ERV1	0	5015	4	3
1010	18054	129	28	28	chr8	55724204	55726537	-89412099	-	MER41-int	LTR	ERV1	-14	5932	3598	3
1045	15828	108	81	35	chr8	60300598	60303541	-84835095	-	MER4-int	LTR	ERV1	0	8270	3916	3
1057	11269	127	46	25	chr8	61899274	61900745	-83237891	-	MER50-int	LTR	ERV1	-1158	6047	4537	3
1066	11385	100	22	21	chr8	63098157	63098937	-82039699	+	MER61-int	LTR	ERV1	2567	3344	-1873	3
1068	1058	256	214	49	chr8	63420648	63421098	-81717538	+	LTR45	LTR	ERV1	1	525	0	3
1107	12019	103	9	9	chr8	68509078	68511157	-76627479	-	MER61-int	LTR	ERV1	0	5217	3105	3
145	12152	138	17	27	chr8	75627652	75629774	-69508862	-	PABL_A-int	LTR	ERV1	-631	4384	2284	3
152	14912	129	41	35	chr8	82967965	82970494	-62168142	-	MER4-int	LTR	ERV1	-19	6579	4014	3
1235	4523	144	16	10	chr8	85239289	85239996	-59898640	+	MER50	LTR	ERV1	1	711	-23	3
1255	443	303	23	68	chr8	87842843	87843098	-57295538	+	L1ME3C	LINE	L1	5852	6060	-63	3
1267	17576	179	51	50	chr8	89403724	89407969	-55730667	+	HERV35I-int	LTR	ERV1	971	5987	-931	3
1267	17576	179	51	50	chr8	89403724	89407969	-55730667	+	HERV35I-int	LTR	ERV1	971	5987	-931	3
1358	2575	147	30	7	chr8	101333911	101334329	-43804307	+	MSTA	LTR	ERVL-MaLR	1	428	0	3
1433	15834	112	54	16	chr8	111232614	111235263	-33903373	+	MER4-int	LTR	ERV1	3843	6598	0	3
1433	15834	112	54	16	chr8	111232614	111235263	-33903373	+	MER4-int	LTR	ERV1	3843	6598	0	3
1440	1683	148	3	107	chr8	112134050	112134388	-33004248	+	AluSz	SINE	Alu	2	304	-8	3
1450	16498	86	26	15	chr8	113501979	113504770	-31633866	-	PABL_A-int	LTR	ERV1	0	5015	1862	3
1451	7180	139	20	5	chr8	113525315	113526463	-31612173	+	MER50-int	LTR	ERV1	5047	6211	-994	3
193	15302	148	31	27	chr8	126218794	126223153	-18915483	-	MER41-int	LTR	ERV1	-1	7187	609	3
1556	9760	181	27	4	chr8	127322262	127323874	-17814762	+	MSTB-int	LTR	ERVL-MaLR	1	1651	0	3
1593	26113	101	56	14	chr8	132150439	132154193	-12984443	+	MER61-int	LTR	ERV1	958	4818	-399	3
1629	509	336	102	60	chr8	136874763	136875250	-8263386	+	LTR16E1	LTR	ERVL	7	516	-22	3
1640	1854	207	30	82	chr8	138351163	138351653	-6786983	+	MLT1C	LTR	ERVL-MaLR	4	467	0	3
1673	13759	117	58	18	chr8	142643450	142645397	-2493239	-	MER4-int	LTR	ERV1	-711	5887	2416	4
1691	17963	56	11	1	chr8	145069857	145072029	-66607	-	HERVE-int	LTR	ERV1	-1	7812	5619	4
671	25518	129	54	34	chr9	11306455	11308733	-127085984	+	MER61-int	LTR	ERV1	2875	5215	-2	4
677	15710	114	52	17	chr9	12141902	12144552	-126250165	+	MER4-int	LTR	ERV1	3837	6584	-14	4
677	15710	114	52	17	chr9	12141902	12144552	-126250165	+	MER4-int	LTR	ERV1	3837	6584	-14	4
762	2078	172	75	15	chr9	23329110	23329499	-115065218	+	MSTA	LTR	ERVL-MaLR	15	428	0	4
810	21384	164	84	59	chr9	29549738	29554044	-108840673	+	MER41-int	LTR	ERV1	1503	5942	-4	4
816	5515	113	29	5	chr9	30301844	30303232	-108091485	+	L1PA12	LINE	L1	4744	6164	-4	4
825	13457	164	75	47	chr9	31464777	31467971	-106926746	-	MER41-int	LTR	ERV1	-2	5944	954	4
830	17239	109	15	11	chr9	32128252	32133068	-106261649	+	L1PA10	LINE	L1	2	4864	-1597	4
840	1664	192	112	40	chr9	33511587	33511984	-104882733	-	LTR32	LTR	ERVL	-7	450	22	4
1113	1192	277	64	35	chr9	69292082	69292477	-69102240	+	MLT1J	LTR	ERVL-MaLR	84	490	-22	4
1183	1136	213	18	9	chr9	78389055	78389273	-60005444	+	MLT1A0	LTR	ERVL-MaLR	146	365	0	4
1183	1136	213	18	9	chr9	78389055	78389273	-60005444	+	MLT1A0	LTR	ERVL-MaLR	146	365	0	4
1183	1136	213	18	9	chr9	78389055	78389273	-60005444	+	MLT1A0	LTR	ERVL-MaLR	146	365	0	4
1183	1136	213	18	9	chr9	78389055	78389273	-60005444	+	MLT1A0	LTR	ERVL-MaLR	146	365	0	4
1266	10371	166	36	35	chr9	89301130	89302293	-49092424	+	LTR25-int	LTR	ERV1	5204	6377	-811	4
1266	10371	166	36	35	chr9	89301130	89302293	-49092424	+	LTR25-int	LTR	ERV1	5204	6377	-811	4
1304	7941	64	18	12	chr9	94267075	94267859	-44126858	-	PABL_A-int	LTR	ERV1	-631	4384	3602	4
1312	15760	106	48	16	chr9	95324155	95326827	-43067890	-	MER4-int	LTR	ERV1	0	6598	3837	4
1312	15760	106	48	16	chr9	95324155	95326827	-43067890	-	MER4-int	LTR	ERV1	0	6598	3837	4
1418	1525	112	12	39	chr9	109302286	109302545	-29092172	-	MLT1B	LTR	ERVL-MaLR	-138	252	1	4
1483	2623	169	12	2	chr9	117798429	117798851	-20595866	-	MSTB	LTR	ERVL-MaLR	0	426	1	4
1503	3090	111	5	9	chr9	120347398	120347826	-18046891	+	MSTA	LTR	ERVL-MaLR	3	428	0	4
1539	2095	144	124	5	chr9	125088254	125088631	-13306086	+	MSTA	LTR	ERVL-MaLR	1	428	0	4
1551	2663	134	14	27	chr9	126739013	126739451	-11655266	+	MSTB1	LTR	ERVL-MaLR	1	432	0	4
1551	2663	134	14	27	chr9	126739013	126739451	-11655266	+	MSTB1	LTR	ERVL-MaLR	1	432	0	4
1615	2653	139	23	41	chr9	135052437	135052820	-3341897	+	MSTA	LTR	ERVL-MaLR	1	388	-40	4
586	303	268	31	47	chr10	230156	230194	-133567228	-	MER5A	DNA	hAT-Charlie	-29	160	124	3
610	1851	197	23	10	chr10	3303632	3304017	-130493405	-	MLT1B	LTR	ERVL-MaLR	0	390	1	3
624	26959	89	15	10	chr10	5169491	5173286	-128624136	-	LTR19-int	LTR	ERV1	-337	5249	1436	3
624	26959	89	15	10	chr10	5169491	5173286	-128624136	-	LTR19-int	LTR	ERV1	-337	5249	1436	3
625	14530	98	46	20	chr10	5263581	5265822	-128531600	-	MER4-int	LTR	ERV1	-459	6139	3837	3
643	2310	93	173	0	chr10	7679695	7680049	-126117373	-	MSTA	LTR	ERVL-MaLR	0	428	1	3
717	14251	104	60	26	chr10	17382565	17385066	-116412356	+	MER4-int	LTR	ERV1	3998	6592	-6	3
747	2139	175	59	8	chr10	21234215	21234601	-112562821	+	MSTB	LTR	ERVL-MaLR	20	426	0	4
753	1907	129	164	0	chr10	22084033	22084389	-111713033	-	MSTA	LTR	ERVL-MaLR	-2	426	1	4
818	1288	73	0	6	chr10	30586608	30586774	-103210648	-	MER41-int	LTR	ERV1	-944	5002	4838	4
825	2298	150	57	0	chr10	31544236	31544635	-102252787	+	MSTA	LTR	ERVL-MaLR	6	428	0	4
855	3701	120	17	9	chr10	35443546	35444125	-98353297	+	LTR10C	LTR	ERV1	1	529	-62	4
856	6364	157	60	6	chr10	35543399	35544560	-98252862	+	Tigger3b	DNA	TcMar-Tigger	3	1230	-1	4
856	6364	157	60	6	chr10	35543399	35544560	-98252862	+	Tigger3b	DNA	TcMar-Tigger	3	1230	-1	4
874	29521	186	5	2	chr10	37938752	37943892	-95853530	+	HERVS71-int	LTR	ERV1	3721	8909	-69	4
930	6759	58	8	16	chr10	45275931	45276700	-88520722	-	LTR19-int	LTR	ERV1	-1054	4532	3766	4
1140	1902	147	122	18	chr10	72808595	72808977	-60988445	-	MSTA	LTR	ERVL-MaLR	-1	427	1	4
1202	16376	96	40	18	chr10	80953486	80955434	-52841988	-	MER61-int	LTR	ERV1	-473	4744	2783	4
1254	19447	107	143	113	chr10	87799615	87802524	-45994898	+	MER4-int	LTR	ERV1	2556	5822	-776	5
1254	19447	107	143	113	chr10	87799615	87802524	-45994898	+	MER4-int	LTR	ERV1	2556	5822	-776	5
1274	17138	111	26	18	chr10	90412581	90415719	-43381703	+	MER61-int	LTR	ERV1	2201	6066	-1139	5
1372	1972	151	99	64	chr10	103224755	103224976	-30572446	-	MSTA	LTR	ERVL-MaLR	0	428	204	5
1374	5511	124	29	10	chr10	103528860	103529783	-30267639	-	MER41-int	LTR	ERV1	-367	5579	4639	5
1383	24159	91	35	18	chr10	104609110	104612862	-29184560	+	MER61-int	LTR	ERV1	1649	5217	0	5
1396	14750	126	62	29	chr10	106376484	106379554	-27417868	+	MER4-int	LTR	ERV1	1862	6536	-62	5
1410	14380	169	31	20	chr10	108245177	108250025	-25547397	+	MER41-int	LTR	ERV1	2170	5484	-462	5
1410	14380	169	31	20	chr10	108245177	108250025	-25547397	+	MER41-int	LTR	ERV1	2170	5484	-462	5
1421	10260	109	65	19	chr10	109636347	109636611	-24160811	+	MER4-int	LTR	ERV1	5527	5783	-815	5
1477	9740	213	86	72	chr10	116993315	116996952	-16800470	+	MER34B-int	LTR	ERV1	1153	5355	-1	5
1477	9740	213	86	72	chr10	116993315	116996952	-16800470	+	MER34B-int	LTR	ERV1	1153	5355	-1	5
1526	971	264	102	26	chr10	123421382	123421724	-10375698	+	LTR16	LTR	ERVL	66	436	-2	5
608	15487	96	46	20	chr11	3116875	3118164	-131968458	+	MER4-int	LTR	ERV1	5285	6598	0	5
611	41931	66	7	8	chr11	3474025	3479237	-131607385	-	HERVE-int	LTR	ERV1	-1	7812	2611	5
611	41931	66	7	8	chr11	3474025	3479237	-131607385	-	HERVE-int	LTR	ERV1	-1	7812	2611	5
645	8223	117	52	42	chr11	7970683	7971241	-127115381	-	MER4-int	LTR	ERV1	-903	5695	5120	5
699	3746	168	25	72	chr11	15013518	15013713	-120072909	-	HUERS-P1-int	LTR	ERV1	-630	5633	5425	5
724	958	212	33	45	chr11	18243815	18244062	-116842560	+	LTR41C	LTR	ERVL	1	244	-457	6
727	29779	115	34	55	chr11	18688780	18689592	-116397030	+	MER41-int	LTR	ERV1	4408	5192	-754	6
727	29779	115	34	55	chr11	18688780	18689592	-116397030	+	MER41-int	LTR	ERV1	4408	5192	-754	6
728	1939	164	101	54	chr11	18778431	18778838	-116307784	+	MSTA	LTR	ERVL-MaLR	1	428	0	6
779	2179	168	157	4	chr11	25468209	25468730	-109617892	-	HERVE-int	LTR	ERV1	-2	7811	7211	6
1031	2031	206	77	18	chr11	58487269	58487712	-76598910	+	MLT2B1	LTR	ERVL	1	471	-49	6
1032	13337	108	62	72	chr11	58717152	58719868	-76366754	-	MER4-int	LTR	ERV1	-3	8267	3916	6
1033	8765	125	44	23	chr11	58791839	58794337	-76292285	-	PABL_A-int	LTR	ERV1	0	6598	3271	6
1033	8765	125	44	23	chr11	58791839	58794337	-76292285	-	PABL_A-int	LTR	ERV1	0	6598	3271	6
1058	12778	101	42	23	chr11	62090794	62091236	-72995386	+	MER4-int	LTR	ERV1	5471	5907	-691	6
1102	63131	67	4	7	chr11	67845654	67853485	-67233137	-	HERVE-int	LTR	ERV1	-1	7812	3	6
1102	63131	67	4	7	chr11	67845654	67853485	-67233137	-	HERVE-int	LTR	ERV1	-1	7812	3	6
1132	63404	65	4	5	chr11	71741114	71748930	-63337692	+	HERVE-int	LTR	ERV1	3	7812	-1	6
1132	63404	65	4	5	chr11	71741114	71748930	-63337692	+	HERVE-int	LTR	ERV1	3	7812	-1	6
1176	11448	101	53	52	chr11	77582278	77583621	-57503001	+	MER4-int	LTR	ERV1	4519	5827	-771	6
1176	11448	101	53	52	chr11	77582278	77583621	-57503001	+	MER4-int	LTR	ERV1	4519	5827	-771	6
1211	1937	169	75	27	chr11	82105281	82105688	-52980934	-	MSTA	LTR	ERVL-MaLR	0	428	1	6
1249	8957	120	15	22	chr11	87088035	87088907	-47997715	-	MER61-int	LTR	ERV1	-1762	3455	2585	7
1281	1643	234	6	3	chr11	91282147	91282511	-43804111	+	MLT1A0	LTR	ERVL-MaLR	1	365	0	7
1308	18760	153	56	38	chr11	94815585	94819189	-40267433	+	MER4-int	LTR	ERV1	1015	6580	-18	7
1333	22866	98	27	10	chr11	98066198	98069044	-37017578	-	MER61-int	LTR	ERV1	-943	4274	1391	7
1338	23164	107	60	37	chr11	98759586	98761479	-36325143	+	MER61-int	LTR	ERV1	1320	3323	-1894	7
1552	12677	104	27	29	chr11	126846515	126848972	-8237650	+	MER41-int	LTR	ERV1	2709	5944	-2	7
1552	12677	104	27	29	chr11	126846515	126848972	-8237650	+	MER41-int	LTR	ERV1	2709	5944	-2	7
1605	1246	185	56	20	chr11	133736186	133736503	-1350119	-	MSTB	LTR	ERVL-MaLR	-12	420	7	7
1605	1246	185	56	20	chr11	133736186	133736503	-1350119	-	MSTB	LTR	ERVL-MaLR	-12	420	7	7
1605	2394	135	117	5	chr11	133771421	133771801	-1314821	+	MSTA	LTR	ERVL-MaLR	1	428	0	7
606	2303	163	54	0	chr12	2756692	2757097	-130518212	-	MSTA	LTR	ERVL-MaLR	0	428	1	7
648	62931	69	4	5	chr12	8282795	8290617	-124984692	-	HERVE-int	LTR	ERV1	-1	7812	3	7
648	62931	69	4	5	chr12	8282795	8290617	-124984692	-	HERVE-int	LTR	ERV1	-1	7812	3	7
654	3697	80	4	0	chr12	9140490	9141004	-124134305	-	LTR19-int	LTR	ERV1	-1205	4381	3866	7
658	24625	99	24	20	chr12	9636918	9638847	-123636462	-	MER61-int	LTR	ERV1	0	5217	3269	7
660	20237	97	11	10	chr12	9899328	9902230	-123373079	-	MER61-int	LTR	ERV1	-510	4707	1803	7
666	29469	103	37	19	chr12	10656654	10660474	-122614835	+	MER41-int	LTR	ERV1	2105	5944	-2	7
755	15417	98	54	36	chr12	22301334	22302657	-110972652	+	MER4-int	LTR	ERV1	5224	6596	-2	8
780	2387	173	24	5	chr12	25567484	25567902	-107707407	+	MSTB	LTR	ERVL-MaLR	1	426	0	8
896	3728	152	10	5	chr12	40851613	40852229	-92423080	-	LTR31	LTR	ERV1	0	619	1	8
920	12127	103	23	7	chr12	44030773	44032910	-89242399	+	MER41-int	LTR	ERV1	2079	5944	-2	8
920	12127	103	23	7	chr12	44030773	44032910	-89242399	+	MER41-int	LTR	ERV1	2079	5944	-2	8
942	14565	111	46	15	chr12	46855042	46857398	-86417911	-	MER4-int	LTR	ERV1	-285	6313	3878	8
972	12800	92	32	10	chr12	50769521	50770999	-82504310	+	MER41-int	LTR	ERV1	3130	5636	-310	8
972	12800	92	32	10	chr12	50769521	50770999	-82504310	+	MER41-int	LTR	ERV1	3130	5636	-310	8
1030	7102	97	26	14	chr12	58412924	58414002	-74861307	-	MER41-int	LTR	ERV1	0	5946	4856	8
1036	2027	149	122	8	chr12	59135713	59136092	-74139217	-	MSTA	LTR	ERVL-MaLR	0	428	1	8
1045	20167	108	29	16	chr12	60387969	60391284	-72884025	-	MER61-int	LTR	ERV1	-62	5155	1744	8
1053	5279	210	53	98	chr12	61355519	61357259	-71918050	-	MER52D	LTR	ERV1	-423	1700	44	8
1053	5279	210	53	98	chr12	61355519	61357259	-71918050	-	MER52D	LTR	ERV1	-423	1700	44	8
1120	15540	123	35	30	chr12	70157118	70158416	-63116893	+	MER4-int	LTR	ERV1	5265	6596	-2	8
1120	15540	123	35	30	chr12	70157118	70158416	-63116893	+	MER4-int	LTR	ERV1	5265	6596	-2	8
1296	5384	145	13	21	chr12	93250114	93250558	-40024751	-	HUERS-P1-int	LTR	ERV1	-426	5837	5398	9
1355	2405	163	19	30	chr12	101016125	101016556	-32258753	-	MSTB	LTR	ERVL-MaLR	0	426	1	9
1396	2096	128	51	13	chr12	106395237	106395616	-26879693	-	MSTA	LTR	ERVL-MaLR	-34	394	1	9
1508	2280	94	128	29	chr12	121049508	121049704	-12225605	+	MSTA	LTR	ERVL-MaLR	194	428	0	9
1508	2280	94	128	29	chr12	121049508	121049704	-12225605	+	MSTA	LTR	ERVL-MaLR	194	428	0	9
1508	2280	94	128	29	chr12	121049508	121049704	-12225605	+	MSTA	LTR	ERVL-MaLR	194	428	0	9
1539	7927	90	46	23	chr12	125060329	125061556	-8213753	-	MER4-int	LTR	ERV1	-45	6553	5282	9
1573	976	340	93	14	chr12	129579877	129580392	-3694917	-	LTR16E2	LTR	ERVL	-6	562	3	9
1574	1016	220	142	22	chr12	129715423	129715794	-3559515	+	LTR37A	LTR	ERV1	4	426	0	9
1586	15057	103	62	24	chr12	131319141	131321789	-1953520	-	MER4-int	LTR	ERV1	-2	6596	3840	9
825	2019	167	33	0	chr13	31553821	31554175	-82810153	-	MER47A	DNA	TcMar-Tigger	0	366	1	1
846	551	293	40	0	chr13	34292603	34292770	-80071558	-	ERVL-E-int	LTR	ERVL	-2422	3245	3072	1
926	2253	152	73	8	chr13	44739529	44739926	-69624402	-	MSTB	LTR	ERVL-MaLR	-1	425	1	1
926	2575	165	48	107	chr13	44799628	44800026	-69564302	-	LTR75_1	LTR	ERV1	-151	395	1	1
969	425	356	76	56	chr13	50368816	50369280	-63995048	+	L2c	LINE	L2	2910	3383	-4	1
975	9412	65	49	40	chr13	51131060	51132160	-63232168	+	MER41-int	LTR	ERV1	4574	5686	-260	1
1051	11775	111	21	29	chr13	61115185	61117124	-53247204	+	MER41-int	LTR	ERV1	2941	5696	-250	1
1055	25841	86	33	18	chr13	61666752	61670500	-52693828	-	MER61-int	LTR	ERV1	0	5217	1412	1
1073	16348	108	27	11	chr13	64052600	64055026	-50309302	-	MER61-int	LTR	ERV1	0	5217	2753	1
1105	21482	107	48	23	chr13	68257764	68261389	-46102939	+	MER61-int	LTR	ERV1	1411	5206	-11	1
[truncated: 6,918 more rows]
