# Supplementary material for: Sequence Motif Analysis of PRDM9 and Short Inverted Repeats Suggests Their Contribution to Human Microdeletion and Microduplication Syndromes
Source: MDPI journal article supplement (doi:10.3390/biomedinformatics3020018), 2023-04-01
Supplement: s1 [file s1 › Table S4.txt]

Names	total	elements
HJs PRDM9	1127	CLMP
		C10orf90
		PDCL3
		SALL1
		TMSB10
		UTY
		COPRS
		ZG16
		CHD9
		GRM2
		TMEM132E
		SORL1
		ABR
		DUSP4
		PSMG4
		SYT13
		CETN3
		CHST15
		CD82
		TP53TG3C
		EMX2
		MTMR14
		SEC23IP
		SDC2
		PDP1
		HABP4
		AGPS
		ADRA1A
		RTN4RL1
		HK3
		RBPMS
		SPATA19
		CHMP2B
		IRX3
		CYSTM1
		WAPL
		AHRR
		VRK2
		SGF29
		TBC1D3B
		PREX2
		GPATCH8
		GPR135
		JAK2
		USP9Y
		OTUD7A
		RAB11FIP4
		GGTLC2
		FAM49A
		XXYLT1
		FGF12
		ERMARD
		ICE1
		NCK2
		PSMD12
		SPATS2L
		EPB41L3
		OSTN
		ARID1B
		NIPA2
		GBX2
		MFSD14B
		SLC14A2
		ALAS1
		FARS2
		LRRFIP1
		TBPL2
		RPS6KA2
		PLPPR5
		GNLY
		SMOC2
		CCL23
		SLC12A7
		RBMY1A1
		ATP2C2
		CD276
		TUBB2B
		ESAM
		EPC2
		PAX6
		IPPK
		CLDN3
		RASGEF1B
		MAPKAPK3
		PAPD7
		NEO1
		LAT
		CD28
		GLIS3
		DNAJC5B
		PPP2R2A
		IQCF6
		CWC22
		C15orf39
		RBMY1E
		HRH1
		BHLHE40
		MTO1
		ADIRF
		ITGAX
		COL4A6
		NAB1
		IL10RA
		EIF1AY
		SULF1
		SLC39A10
		CDCA2
		FTCDNL1
		PUDP
		HCN4
		CD8B
		HELZ
		ADCY2
		SHTN1
		TP53TG3
		JAKMIP3
		LMCD1
		SARAF
		ATRNL1
		USP50
		RGPD3
		PDCD1LG2
		ZNF689
		PMS1
		RPL31
		GOLGA8R
		SORBS3
		GSE1
		SPRED2
		SLIT2
		POU3F3
		C2orf88
		ZNF804A
		MTX2
		KCNJ16
		C9orf3
		SYNM
		MYO1D
		SESTD1
		AOX1
		KTN1
		SYT4
		ARHGAP11B
		TPD52L3
		SLC38A11
		STARD7
		SDHA
		RCBTB2
		FANCD2
		AFF3
		ST8SIA5
		LPP
		CHST8
		NMB
		CHRDL1
		MEX3B
		C8A
		MMRN2
		NMS
		FAM20A
		FKBP7
		ARHGAP17
		TP53TG3E
		RTL1
		MECP2
		TOP3B
		ENSG00000259753
		BMPR1A
		TMEM127
		DSCAML1
		EML1
		GALNT13
		RAPH1
		CNTN4
		RAP1GAP2
		ARMC1
		HBEGF
		FZD2
		OPN4
		PIK3C3
		ANKRD28
		MED10
		WTIP
		ERMP1
		ARL4C
		LSG1
		GALR1
		SLC47A1
		KIFC1
		TM2D3
		CDH17
		ADGRL1
		ABCA8
		NPIPB11
		UBR5
		BTBD16
		SATB2
		SLC25A13
		ZNF516
		MPI
		IRX1
		MRPL35
		TNKS
		CDY1B
		PYDC2
		VCX
		PPP1R26
		TMEM40
		ELP3
		RFX8
		PELI1
		MUC4
		ARRDC4
		LEMD3
		PLEKHF2
		PRR14
		ZNF267
		SCGB2B2
		CSRNP3
		ZBTB14
		IRF4
		ITGAM
		TBC1D3F
		PRDM11
		VCX3B
		SEPT4
		TMEM150C
		PEX2
		TPRG1
		GLRX3
		HTR2B
		DNASE2
		USP31
		AKAP1
		SLC1A1
		IFNG
		OTOS
		CCL8
		SLC6A19
		KCNQ2
		MARCH6
		CCDC33
		COPS8
		UNC93A
		IQSEC1
		SNRPN
		ALX4
		EDEM1
		ZNF280B
		NPIPB13
		FAM210A
		FGD5
		KIF13B
		IL33
		PEMT
		ARHGAP6
		PTBP2
		DESI2
		PABPC1
		PPM1F
		DPY19L4
		FZD6
		GRM4
		SIX1
		LHFPL3
		CTSH
		MAP4K4
		DOCK3
		KCNJ5
		IGIP
		PRAME
		SNED1
		HIP1
		KRBOX4
		FAM58A
		TRIM25
		CDKN3
		ITPRIP
		FRG2B
		NDFIP1
		CHCHD4
		CDKAL1
		GATA4
		PPIAL4G
		NDN
		OR4F6
		ARNT2
		DLG1
		TECTA
		GNAL
		PEBP4
		SH3BP4
		PROP1
		G2E3
		NWD1
		CD2BP2
		C16orf54
		UNC5A
		RCL1
		B3GAT1
		RHOT1
		HERC2
		CAND1
		OR8D4
		COPS9
		KPNA2
		DDX53
		RASGRF1
		FOXI2
		ATAD1
		ATOH8
		SLC6A6
		OBP2A
		MPP4
		BARX2
		MBD5
		TMEM87B
		ZBTB18
		HSPA8
		TMED9
		RHOBTB2
		RABEP2
		IL5RA
		SPDYE5
		DGKD
		SERTAD2
		YWHAZ
		OPA1
		POC1A
		GNRH1
		CAV3
		ATG7
		GNS
		FDFT1
		MYL10
		IL21R
		HNF4G
		PSIP1
		SMCHD1
		TNFRSF19
		ROPN1L
		TSPYL5
		ORC5
		CERS3
		GFRA2
		HABP2
		REEP1
		BBX
		GALNT15
		USP40
		GSG1L
		CCDC174
		BUB3
		TCF7L1
		UBASH3B
		WDR61
		SIX6
		HDAC4
		MAPK1
		ATP9A
		HSD17B3
		FTO
		GNAZ
		ADAMTS15
		ZNF706
		PGAP1
		TYW5
		OPCML
		LRRC37B
		FEZ1
		GPR35
		EBF2
		UXS1
		KCNJ3
		EXTL3
		COPS3
		ROBO3
		FGF5
		NSMCE1
		DCPS
		TFPI
		ABCA9
		CCDC180
		TWIST2
		GABRB3
		MKI67
		IL4R
		SEC11A
		SPP2
		SPAG1
		KIAA1024
		PLGLB1
		EMILIN2
		PLPP3
		BUD13
		STXBP1
		METTL13
		FGD3
		CD47
		RAB1A
		CLDN1
		ICOS
		ABCC1
		AGXT
		UBE3A
		KLF13
		MORF4L1
		LOXHD1
		ZC3H15
		RPRM
		ZKSCAN2
		C2orf40
		ERCC6L2
		EVL
		ACSL4
		VCX2
		CDYL
		COBLL1
		SMNDC1
		FAN1
		REC114
		UBE2E3
		FBP2
		PRDX6
		CLDN4
		PIGZ
		LYSMD4
		PROK2
		UBE2F
		CYFIP1
		BPY2B
		LDLRAD4
		UHRF2
		LRRC17
		GPI
		NR0B1
		COIL
		RAB11FIP2
		DLL1
		ZNF407
		MAPT
		C8orf37
		POMZP3
		NPAP1
		MAP2K6
		ATP2A1
		YY1
		C14orf105
		ZNF80
		BNIP3
		CBLB
		NEMP2
		RAMP1
		CLDN23
		PDE8A
		PPP1R3B
		FHL2
		FGFR2
		DISP1
		IL22
		THOC1
		SMIM21
		AP5M1
		DIEXF
		CYP2E1
		PLEKHA1
		RBMY1J
		USP2
		PER2
		CXXC5
		LRRTM1
		GLI3
		PTCH1
		OSBPL6
		GRB14
		REG3G
		PBK
		FAF2
		PDE1A
		DCTN6
		EPHX2
		GPR26
		GPR31
		CPA6
		FAM92B
		THOC3
		RGPD4
		GLUD1
		ACRV1
		BDH1
		CBFB
		TUBB2A
		KIF2B
		SCARA5
		TNFSF4
		ACADSB
		BCL2L11
		SCPEP1
		PXDC1
		LOXL2
		LRRK1
		TEX44
		XPNPEP1
		CYP20A1
		ZSWIM2
		GOLGA8H
		SLC1A4
		ASIC2
		INTS9
		NEU4
		CACNG3
		EPG5
		PRKD1
		CALCRL
		USP34
		AQP12B
		ZNF367
		THBS2
		ETS1
		NBPF11
		CAB39
		NPPC
		ZEB2
		CYLD
		NAA30
		PDE11A
		APCDD1
		MSTN
		SLC26A5
		SRGAP3
		OAF
		CCDC146
		HNRNPA3
		SDR42E2
		RIMS2
		SYT14
		ZNHIT3
		RNF149
		LMX1B
		IRF8
		SPATA13
		LRRC28
		AGAP1
		NDUFA10
		CTNNA2
		FMNL2
		CAPN7
		CCL3
		ALKBH3
		NANOS1
		KDM3A
		MLPH
		FANK1
		NCAPG
		SLC35F4
		PRKCA
		KHDC1
		DNAJC10
		RIT2
		CYP11A1
		ABCC6
		SLC35G3
		LCORL
		GALNT3
		CPXM2
		COL4A5
		MSRB3
		PRSS51
		LRRN1
		PTCD3
		NFIA
		CACNG5
		UNC45B
		ZNF510
		TRIQK
		HES1
		CLDN16
		FGGY
		VGLL3
		C16orf45
		EXOC3
		ZNF385B
		ING5
		N4BP2L2
		KLHL36
		MARF1
		RFX3
		LCMT1
		SNX19
		DUSP5
		FCN1
		TIMM22
		BIRC7
		TOX3
		EXOC2
		BRK1
		DPYD
		COX10
		FANCC
		KCNQ5
		ZBTB20
		XPC
		PCSK6
		LONRF2
		ATP10A
		ATP6V1C1
		RBBP6
		HRH2
		CRABP1
		CDY2A
		GRIP1
		AMELX
		ATP2B2
		DLGAP1
		TYRP1
		TARSL2
		POLR1A
		TMPRSS4
		CD8A
		SUMF1
		NF1
		NRAP
		IGLL5
		PPCDC
		PARP4
		BEGAIN
		SC5D
		CEP164
		WIF1
		FLI1
		CCT6B
		MUC20
		RABL6
		NPIPA5
		LAMA1
		SETBP1
		C2orf69
		EEF2K
		NRXN1
		VWA3A
		ADAMTS17
		NDUFV2
		BLK
		PPP4R1
		TWSG1
		CD109
		UBE2QL1
		ATG4A
		FOXG1
		SYN2
		DACT2
		ENSG00000259680
		GRAMD1B
		ADGRE5
		CCL18
		NRN1
		F13A1
		XPO6
		FMR1
		ANKMY1
		ZDHHC7
		FAHD2B
		ADCYAP1
		PNMA2
		IRX4
		CHD7
		SLC6A1
		ADHFE1
		RTP2
		TMEM38A
		PAPOLG
		TIAM2
		CHD2
		C14orf37
		MELTF
		LPIN2
		PFDN1
		CLPTM1L
		NOX3
		D2HGDH
		FBLN2
		VCX3A
		TOM1L1
		RGS22
		WDR27
		TMEM200C
		CEP192
		FAM50B
		FSIP2
		ZNF720
		GPAM
		SLC35C1
		KIF1A
		NHS
		SLC9C2
		ACOXL
		PGPEP1L
		HS3ST2
		CACNG1
		TP53TG3D
		COL26A1
		C17orf78
		ST3GAL5
		FOXF2
		PTCHD1
		TSPAN17
		BNC2
		OMG
		GULP1
		COL12A1
		ABLIM1
		RYBP
		ACKR3
		HDLBP
		CHRNA7
		ACTR2
		ZNF519
		FAM174B
		TVP23C
		ELP4
		IL26
		IRS4
		FOXQ1
		KCNE1
		JAM3
		MYOM1
		CRY2
		MSL3
		NAPG
		CCDC141
		DPH3
		DFNB59
		SLC40A1
		RBMY1F
		FANCL
		USP10
		WDR75
		LY86
		DEGS2
		INTS8
		ZNF721
		SPACA3
		MERTK
		OLFM1
		RUNX1
		TSHZ2
		SNX31
		GRHL2
		TEKT3
		FAM69B
		DYRK2
		ZNF595
		BHLHE22
		PRPF4B
		SIM1
		ZFHX4
		BLID
		CHL1
		TIGIT
		REG1B
		UQCRB
		CACUL1
		TNK2
		ITPR1
		DPH6
		RRS1
		TAS2R1
		PCDHAC2
		NEUROD1
		CASP7
		AATF
		TMEM106A
		LHFPL4
		GOSR1
		BPY2
		B3GLCT
		MGMT
		BUB1
		RAB17
		SNX7
		BCL7C
		PSTPIP2
		NUP210
		FMR1NB
		PACRG
		TP53TG3F
		WDR11
		LRRTM4
		TIMM9
		OTX2
		GAL3ST2
		IQCA1
		ANOS1
		TBC1D30
		HCCS
		FAM173B
		IL1R2
		KDM4C
		TDRD12
		SLC7A9
		CA10
		IGF1R
		PURG
		SF3B1
		TMEM260
		IRX2
		MSI2
		TXNDC2
		FAM185A
		TNFRSF10B
		CDK5R1
		KCNIP4
		SLC47A2
		MTCL1
		LRRN3
		NIPA1
		ZFP64
		MSRA
		RAB12
		HSFY1
		XKR6
		DOCK5
		TMEM242
		METTL4
		NOG
		TCF7L2
		DAP
		COL6A3
		CLRN3
		STMN4
		RNF19A
		GMDS
		MAGEB4
		ASB7
		SGO2
		SCN2B
		RELN
		HS3ST4
		JUN
		QTRT2
		DMAC1
		CRISPLD2
		RUNDC3A
		OCA2
		DAAM1
		TNFRSF10D
		TRAF3IP1
		STK17B
		CNTN6
		PYDC1
		GPC1
		AKAIN1
		FYB2
		CRTAM
		ADAM12
		CSPG4
		AHSA2
		NBPF12
		PELI2
		PRKRA
		CLUH
		BAK1
		PCDHAC1
		PAPSS2
		SMC3
		NT5M
		MTRR
		YTHDF1
		C10orf120
		RPS4Y2
		QDPR
		TMEM98
		UGT1A10
		MEIS2
		ALCAM
		TRIM29
		ADRA2A
		ABRAXAS2
		ADAMTS16
		RANBP6
		ABI2
		IKZF3
		IMMT
		HLF
		TCF4
		CDY1
		NR2C2
		PAEP
		MLN
		SULT1A2
		SCN3A
		CFAP58
		PIEZO2
		ADRB1
		NTM
		VTI1A
		AMMECR1
		TTC30B
		DUSP14
		COL5A2
		RAB9B
		NAIP
		CFAP43
		CHST10
		THY1
		TBC1D8
		REPS2
		CCL4
		GABRG3
		MRPS9
		ANAPC1
		BSX
		CAND2
		RIMS1
		BCL6
		TRUB1
		L3MBTL4
		CEP68
		SCART1
		ASB1
		MCTP2
		YES1
		TSPAN14
		FILIP1
		SNURF
		HYAL2
		KIAA0556
		RBMY1D
		COLEC12
		NR2F2
		NUP35
		EI24
		PLPP4
		DOCK1
		NPAS2
		INPP5F
		MYBL1
		CDC27
		ARHGAP32
		NECTIN1
		SLC25A2
		TMED3
		MYL12B
		SLC22A23
		FLCN
		PRAG1
		HS3ST3B1
		CRH
		NHLRC2
		JAML
		VPREB1
		SUSD3
		ARL4D
		SH3BP5
		ACSBG1
		TBC1D21
		P3H2
		ENSG00000262633
		BPY2C
		TRNT1
		RAI2
		AFDN
		ANKRD44
		PDE7A
		DMRT2
		TERT
		KCMF1
		CPLX2
		GUCY2F
		ST3GAL4
		ZNF507
		ZNF169
		GRM7
		STS
		ALDH1A3
		TGIF1
		ZNF782
		PNLIPRP3
		PTPRM
		IGSF9B
		KIRREL3
		DOK2
		FSBP
		SPRY4
		PCTP
		GFRA1
		DAZ2
		ADPGK
		DLK1
		BAALC
		COX7C
		APC
		PMP22
		WFDC1
		SNAPC3
		IL18R1
		MCMBP
		REG3A
		SPATA8
		RALBP1
		FBXL13
		SLC17A5
		ACCSL
		TEX15
		ARL8B
		VGLL4
		RNF135
		MPZL2
		CTNND2
		ERI1
		RASSF3
		C17orf67
		KCTD15
		TCP10
		DAB1
		GDF6
		ZNF141
		SFR1
		CHST1
		C5orf38
		RIC1
		FOXC1
		LSM14A
		DNAH6
		HAO1
		TMEM237
		SDHAF3
		CTSV
		TBC1D28
		CACNG4
		SIMC1
		TAMM41
		PPP3CC
		VAPA
		DLX6
		ZNF236
		GSTO2
		RAF1
		ANKRD46
		SYNRG
		RNF112
		BZW1
		ZRANB1
		MYLK4
		CNNM4
		AGPAT4
		LAT2
		BMP4
		SPDYE16
		RGR
		ANO7
		SPDYE6
		SGCG
		RAB31
		DCAF16
		ABHD17C
		CCL2
		ZNF629
		TLDC1
		ECI2
		EEF1A1
		PDCD2
		MAST1
		IDH3A
		COPS7B
		NSUN2
		LGALSL
		NMUR1
		TMEM45B
		COTL1
		SACS
		SP100
		RAI1
		NPEPPS
		CCDC182
		NFIB
		T
		IQCF1
		DMBT1
		ANKRD30B
		ARRDC3
		PLCL1
		CHRNA4
		RAB40A
		WNT7A
		ZBTB9
		R3HCC1
		RPA1
		MTHFS
		CRBN
		TMEM164
		ST6GAL2
		POLN
		FGFR1OP
		MED28
		ABHD11
		ENSG00000249141
		B4GALT7
		MPDZ
		AAED1
		REL
		OXNAD1
		PCDHB1
		NCALD
		MLANA
		ARFGEF1
		ZNF286B
		SCAMP2
		RGMA
		SMARCA2
		FAM193B
		KDM5D
		NPS
		RBMY1B
		GMNC
		GOLGA6A
		SLC35G4
		CYP2J2
		ENSG00000266826
		SEMA4C
		TP63
		PEPD
		DAZ4
		PHF21A
		DACT1
		TP53TG3B
		RXFP2
PRDM9	1329	PNCK
		SAMD4A
		PKNOX2
		IRAK1
		CHD8
		SUMO1
		MYO9B
		RTN1
		ZAR1L
		TRIM74
		FER1L5
		SERPINF1
		STK25
		BRCA1
		SLK
		HIGD1B
		BAZ1B
		CD160
		GRK5
		PDCD4
		CIAO1
		PYY
		GPR55
		ZDHHC6
		RASA4B
		PPM1A
		PDZD3
		EMC8
		COX7A2
		CACNB1
		ASNSD1
		PRSS56
		SLC9A3
		CHMP7
		OVCA2
		RGS14
		C10orf99
		CAMSAP1
		ARID5A
		RBM6
		HDAC3
		DNAJC30
		FXYD2
		UIMC1
		OTOA
		SLC34A3
		CENPL
		PSD2
		NUGGC
		POLR3G
		HSPA2
		PIGG
		DPYSL4
		TSHZ1
		ICA1L
		DAND5
		TCTA
		NCF1
		NPIPB5
		NEURL3
		NPIPB7
		TRAIP
		CCAR2
		TYMS
		CPNE9
		RNF43
		LYZL6
		SPATA32
		ABHD16B
		CGRRF1
		LSMEM2
		SLC25A39
		STH
		STYXL1
		C16orf78
		NDUFB3
		FMNL1
		TBC1D3I
		NDE1
		ITGA10
		GSR
		UCKL1
		THAP4
		SCGB1C2
		FBXO34
		PCDH12
		SIGLEC15
		TRMT1
		CBWD1
		CKMT1B
		DUSP28
		CNTD1
		ENSG00000273167
		GPSM1
		EFL1
		THUMPD3
		ITGAD
		ARL17B
		CDHR4
		FARP2
		NKX3-1
		TMEM175
		PURA
		TBC1D3G
		ERBB2
		GTF2IRD2B
		LGALS3
		RBSN
		SEPT2
		VSIG10L2
		TTL
		SP140
		SCARA3
		PPP1R36
		RTEL1-TNFRSF6B
		PRDM10
		LRRC26
		SLC6A8
		CCNE2
		MC2R
		ABHD8
		SLC5A10
		PIWIL2
		PRKRIP1
		HTRA1
		KANSL3
		BARX1
		HDAC11
		NXNL1
		TCTE3
		NR2F6
		TMEM218
		TSPAN18
		AZIN1
		POLR2J3
		SLFN11
		C16orf58
		ADAP2
		ADAM8
		BCL7B
		MFSD14C
		CHIC1
		ACAP2
		SLC2A4RG
		MBP
		GJC1
		RPP25
		KLHL20
		CHURC1
		ELMOD3
		CNIH1
		IGSF6
		TUBGCP5
		TPPP
		BTD
		RFFL
		APOA4
		MARS2
		HSF5
		KIF22
		NINJ1
		SFXN4
		TIMP4
		PITPNC1
		MON1A
		ZBTB46
		FKBP6
		RELL2
		FAM92A
		XPO7
		ADAMTS7
		COLQ
		DRG2
		ASTL
		ZADH2
		COG7
		DMRT1
		COX5A
		WNK2
		SH2D6
		SLC25A37
		COL20A1
		OR10D3
		STRADB
		KCNT1
		SLC39A14
		ACACA
		ODF1
		CDK12
		PAFAH1B1
		DOCK8
		SPRN
		GNPDA1
		CHEK1
		PDE6D
		KIF18B
		NEFM
		STMN3
		CHD3
		BCAP31
		EFTUD2
		ARHGAP4
		NDUFAF6
		GOLGA6D
		GTPBP3
		C3orf20
		ATG4B
		EMC3
		RNF103
		CDR2
		OR1G1
		LLGL1
		ACCS
		HECW2
		TLNRD1
		PPP1R42
		AKAP10
		STC1
		KLHDC8B
		PLEKHA3
		SULT1A1
		ELN
		CLUL1
		FAM167A
		SYNJ2
		INPP1
		PCNX4
		SEZ6L2
		GUCY2D
		CIDEA
		ITM2C
		TCTEX1D2
		MCAM
		TNFSF18
		CALY
		RBL2
		NAGS
		OMA1
		TCF24
		UROS
		EGR3
		KCTD9
		PRRT3
		FBXL19
		TMEM100
		RNF165
		DNAH2
		SCLY
		TMEM67
		MST1R
		PTMA
		DUSP19
		PPP1R2
		UBXN8
		PRDX3
		ZDHHC11
		B3GALT4
		GPATCH1
		PAPD5
		SPDYE2B
		PCDH1
		DNAJA2
		ITGA2B
		AARSD1
		TATDN2
		SLC16A6
		NFIX
		ZBTB1
		MYO15A
		GDPD3
		GTF2IRD2
		TP53INP1
		TUBB6
		DDX6
		CORO1A
		NCBP2
		MRPS23
		SPTB
		PGAP3
		FMO5
		CEBPG
		FAH
		LGALS9C
		LYL1
		SERAC1
		NFATC2IP
		COL17A1
		UBA2
		HEXIM2
		C3orf18
		C18orf25
		GLB1L3
		ATP13A5
		MPP3
		RNF212
		CLDN20
		PLCD3
		PARP3
		CATSPERE
		UGP2
		TMEM150A
		CATSPER2
		VPS52
		ENSG00000261873
		TSR1
		HEMK1
		FBXO45
		CUX1
		ULK3
		ZBTB44
		RGPD8
		GTF2IRD1
		TMEM141
		COX4I1
		HSD11B1
		RGPD1
		PRSS36
		ZNF592
		ALS2CR12
		LRRC37A
		MFSD9
		ATG16L1
		RFLNB
		NF2
		POM121
		PCDHGA6
		CUTA
		UPK3BL1
		CLIC6
		PAK2
		TMEM270
		ITPR3
		H2AFY
		RXRB
		PIGX
		TACC2
		INPP5E
		LPO
		STK32C
		TOP3A
		ENSG00000272869
		UGT1A1
		FRY
		PCGF3
		BSN
		ACTR10
		APOBR
		GNAS
		CPLX3
		TMEM250
		SERPINB9
		DHRS7
		IL17RC
		GTF3C3
		DNAJC5
		ZNF484
		IP6K1
		DMRT3
		HYOU1
		PCBP4
		TNFRSF10A
		SLC35D2
		GHRL
		FNDC8
		ZNF395
		EPX
		WNT3
		DPPA5
		NTAN1
		MOB4
		LEMD2
		NOMO1
		TBC1D3E
		RBM44
		OR8D1
		IGLL1
		ALPP
		CHRNA2
		TTC21B
		STRC
		ZC3H6
		USP4
		TMEM25
		LAMB3
		CCL26
		LCN1
		MTHFD1
		ENSG00000283496
		CTSB
		AQP8
		CREBBP
		LMAN2L
		NSMF
		MAP1A
		CTXND1
		NEFL
		ANKHD1-EIF4EBP3
		LGALS9B
		TRIM35
		AP2B1
		UBE2Q2
		DPY19L3
		KAT8
		FGFR4
		DOCK4
		TBC1D3L
		DAG1
		ZFAND6
		LINC00672
		CHD1L
		OR8B12
		ENSG00000258864
		NRROS
		GCDH
		EEF1A2
		C3orf62
		RAB24
		DTX2
		C9orf129
		PPIL3
		HNRNPD
		SEC16A
		YWHAG
		MFSD7
		OR1D5
		RSPH14
		CDC14B
		C14orf39
		NGEF
		NEUROD2
		MRM1
		SAG
		FAM57A
		DHX8
		BOK
		TMEM136
		SRD5A1
		ENSG00000272410
		SLC37A2
		ANKHD1
		GPRIN1
		SLC38A3
		BRD7
		PRSS55
		DTYMK
		WDR53
		HELB
		VENTX
		SLC35E1
		APOD
		NRGN
		VAMP5
		ZNF423
		CHST7
		NKX6-2
		SLC43A2
		PMPCB
		SUZ12
		PDE6B
		MCMDC2
		GGCX
		SUSD4
		PDXDC1
		SBK1
		LRIT2
		ESCO2
		TEX50
		GOSR2
		TNFRSF13B
		VPS54
		PLGRKT
		C16orf87
		EPOP
		FAM53B
		TIRAP
		TMEM120A
		BNIP3L
		MESD
		RHPN2
		DOC2B
		LAP3
		ACP6
		PNPLA7
		ANO8
		STX1B
		CCDC187
		ADGRA1
		AFTPH
		SNRNP200
		RAD54L2
		FAM117B
		SREBF1
		PWWP2B
		PAGR1
		SCNN1G
		UBTF
		ARCN1
		ZBTB25
		SGK3
		C8orf74
		ADAM11
		MIEN1
		RNF123
		LPCAT1
		PCSK7
		GLT6D1
		PYCARD
		PPP1R7
		SCARF1
		SCN3B
		OAT
		SLFN14
		MYL4
		DPYSL2
		GK
		ALPK3
		PTPDC1
		DUSP7
		ACAD8
		TUSC5
		NSD2
		PSMA3
		GRK6
		MEOX1
		ATP5I
		RASL10B
		SULT1A4
		SRPRA
		YWHAE
		CREG2
		PNMT
		TEFM
		FOPNL
		MTHFSD
		CPLX1
		ANKAR
		EFHD1
		LCN12
		NPIPB8
		OR10G7
		PPARG
		RRP9
		PSMG2
		TOM1L2
		IL17RE
		CTF1
		EGFL7
		TIGD1
		IP6K3
		SLBP
		CDC37L1
		C2orf82
		CETN1
		SNAPC4
		STAC2
		SLC9A7
		CSK
		PRPF6
		AKTIP
		RHBDD2
		PPP2CB
		HR
		PCDHB4
		ZNF792
		ENSG00000258724
		NICN1
		TBC1D3C
		RAD51C
		OPRL1
		TULP4
		SNUPN
		NAPEPLD
		MTERF4
		PDCD2L
		DDA1
		SPECC1
		ABCG4
		IL1RAP
		MTMR10
		ZNF599
		ASPHD1
		RBM12B
		GABPB1
		CD3D
		TFRC
		LHPP
		AVPR2
		RP2
		ARAP3
		TMEM210
		SERPINF2
		ALDOA
		MB21D1
		SLC35G5
		MKRN2
		GRAMD1A
		SSNA1
		CCL24
		FBXO43
		PRLHR
		UBE4A
		FASTKD3
		ZNF276
		NSF
		KCNJ1
		ANKRD39
		TVP23B
		BPTF
		JKAMP
		MLLT6
		ADRA2B
		CBL
		C11orf94
		FBXW5
		MYO19
		HES6
		SRPK2
		ALDH3A1
		GRIN1
		ZNF302
		OR1A1
		SLC18A2
		TRPM1
		DNAJC2
		SIX4
		ZNF674
		CD19
		MAPK3
		APLP2
		PRR7
		TGOLN2
		ENSG00000179859
		EIF3C
		WDHD1
		SIDT2
		GRN
		ASB18
		ALPI
		TTLL3
		SALL4
		SPPL2C
		RNF214
		ARID4A
		CMBL
		FYTTD1
		AKAP5
		POU2F3
		C11orf63
		CTBP2
		TTN
		USHBP1
		TMEM219
		BCCIP
		ILKAP
		TMEM30A
		CRK
		COX6A2
		PPP1R1C
		NPTN
		CAPN10
		PNLIPRP1
		SIK3
		RPUSD4
		F2RL3
		WDR55
		ZNF30
		FREM1
		TDRD1
		ARL17A
		RETSAT
		RFTN2
		GGA2
		EVPLL
		RUBCN
		VHL
		C8orf44
		CDHR2
		ENSG00000270249
		NDUFS6
		LDB3
		UBAC1
		SLC6A11
		RPL19
		C2orf49
		EPN2
		PDLIM2
		ADAM7
		KNDC1
		GLRA4
		TP53AIP1
		PRKCB
		PDCD5
		SUPT4H1
		STARD5
		SLFN12
		TIAL1
		USP14
		NRARP
		B3GNT7
		CCDC43
		CDIPT
		KLHL30
		TNXB
		C1QL1
		PSMD11
		TLCD2
		ECEL1
		NQO2
		RPUSD3
		NOP58
		CCDC172
		PTPN2
		SLC3A1
		PTGER1
		COQ10B
		NFE2L2
		TOMM20L
		KIF25
		MTG1
		NOXA1
		ESPNL
		KCTD13
		FBXL20
		FAM120A
		SH2B1
		GTF2H5
		GPR62
		VAX1
		TAOK2
		SAT2
		CLIP2
		SLC9A2
		KDM6B
		SOST
		LCN9
		VIRMA
		GCH1
		DGKQ
		SCNN1B
		PPDPF
		HMBOX1
		FAM153C
		METTL16
		NDC80
		FAM213A
		NSUN5
		CEP72
		TMEM207
		MAPK1IP1L
		HRASLS
		TBC1D3
		QSOX2
		TMCO6
		BHLHA9
		CCL11
		HOXD8
		ATP5A1
		RMND5A
		CRHR1
		DRC3
		DUSP3
		HAUS1
		TECTB
		IRAK2
		SP110
		KIAA0513
		HIC1
		NELFA
		MYSM1
		CDON
		TRIM73
		ZC3H8
		ADAMTS8
		SPATA3
		TRAK2
		ARMC9
		TGFBRAP1
		BBS4
		MINPP1
		PRPF8
		NUDT19
		TMEM221
		GOLGA8K
		HEATR9
		DAXX
		RBM5
		UVSSA
		CRELD1
		SNCG
		ARL5C
		DDX43
		SLC9A4
		ESRP1
		NPIPB4
		ZDHHC21
		BICD2
		ALKBH5
		TAB3
		SOHLH1
		TRAF3IP3
		MTERF3
		NPIPB6
		ISLR2
		MBOAT4
		GABRA5
		GTF2E2
		CRYL1
		HIGD2B
		FZD3
		NMT1
		RND2
		RNMT
		SEMA3F
		G6PC
		POM121C
		LRRC27
		GAK
		ABHD14A
		MRPL36
		MKS1
		PLP1
		IFRD2
		ABCA5
		CPN2
		USP39
		ATXN2L
		PASK
		USP8
		ITGAL
		WDR73
		ARFGAP1
		ENSG00000261130
		UQCRC2
		MAEA
		RNPEPL1
		RDM1
		DARS2
		DPH1
		KANK1
		STT3A
		LRP3
		SOX7
		ADD3
		TPD52L2
		PTPRE
		PTK2B
		PKD1
		CHSY1
		TRPM8
		CDK15
		EXT2
		PNPLA4
		PDLIM7
		CIB2
		ARHGEF12
		RPP40
		MDH1
		RBM33
		THYN1
		MYO1C
		LRRC37A2
		HUS1B
		KCTD18
		LETM1
		NACC2
		NUPR1
		GRIK4
		ATP13A4
		SLC6A18
		BCL9L
		EFNB3
		IREB2
[truncated: 6,679 more rows]
